# Supplementary material
Source: publisher figshare collection journal article supplement (https://gsapubs.figshare.com/articles/dataset/_/24018912)
Supplement: Supplementary file 1 [file 1]

## Sheet: Sheet1
Table S7 Compilation whole-rock major (wt.%) and trace (ppm) element compositions from the Paleozoic magmatic rocks of northern Yili magmatic arc.
NO.	Location	Sample no	Lithology	SiO2	TiO2	Al2O3	FeO	Fe2O3	Fe2O3T	MnO	MgO	CaO	Na2O	K2O	P2O5	LOI	Total	Sc	V	Cr	Co	Ni	Ga	Rb	Sr	Cs	Ba	Y	Nb	Ta	Zr	Hf	Pb	Th	U	La	Ce	Pr	Nd	Sm	Eu	Gd	Tb	Dy	Ho	Er	Tm	Yb	Lu
470-450Ma magmatic rocks
Mafic rocks
21	Biezhentao range	XWQ31	Metagabbro	50.3	0.89	15	n.a.	n.a.	9.44	0.17	8.81	8.3	2.87	1.78	0.17	1.81	99.54	27.8	n.a.	432	34.6	139	n.a.	63	586	n.a.	629	22.9	7.94	0.42	101	3.09	8.38	0.7	0.27	24.9	56.8	8.04	32.9	5.97	1.68	5.15	0.77	4.31	0.88	2.43	0.36	2.35	0.37
22	Biezhentao range	XWQ32	Metagabbro	51.94	0.88	17.46	n.a.	n.a.	7.68	0.12	6.77	8.33	3.32	1.46	0.21	1.38	99.56	22.5	n.a.	338	28.5	92.3	n.a.	37.8	852	n.a.	686	16.6	6.89	0.39	117	3.17	9.77	1.13	0.59	21.2	44.4	6.05	24.5	4.51	1.24	3.99	0.59	3.2	0.64	1.79	0.26	1.71	0.27
23	Biezhentao range	XWQ33	Metagabbro	49.81	1	15.63	n.a.	n.a.	9.79	0.17	8.36	9.21	2.83	1.15	0.19	1.44	99.57	28.3	n.a.	435	33.1	128	n.a.	30.7	674	n.a.	434	24.7	8.27	0.4	109	3.19	7.92	0.79	0.29	26.1	60.4	8.68	36.4	6.78	1.72	5.74	0.86	4.76	0.95	2.68	0.39	2.57	0.39
24	Biezhentao range	XWQ34	Metagabbro	56.07	0.8	18.25	n.a.	n.a.	6.23	0.09	3.92	5.45	4.8	1.28	0.22	2.49	99.61	14.6	n.a.	70.8	16.7	24	n.a.	45.4	706	n.a.	421	13.5	6.24	0.38	139	3.54	10.6	5.32	0.39	36.5	65	7.27	26.3	4.06	1.14	3.8	0.5	2.64	0.53	1.45	0.21	1.38	0.21
25	Biezhentao range	XWQ35	Metagabbro	51.42	0.88	16.38	n.a.	n.a.	7.67	0.12	7.98	8.06	3.28	1.74	0.2	1.8	99.55	24.1	n.a.	388	31.8	108	n.a.	56.3	729	n.a.	729	15.6	7.54	0.44	121	3.36	7.64	1.45	0.4	23	46.4	5.81	22.4	4.04	1.19	3.66	0.53	3	0.61	1.71	0.24	1.65	0.26
26	Biezhentao range	XWQ36	Metagabbro	55.18	0.75	18.29	n.a.	n.a.	6.1	0.1	5.29	6.26	3.87	1.67	0.19	1.87	99.58	16.4	n.a.	207	21.8	75.1	n.a.	57.2	918	n.a.	692	13.8	5.92	0.31	149	3.79	9.11	1.75	0.46	21.8	44.2	5.73	22.7	3.96	1.18	3.45	0.49	2.66	0.54	1.45	0.22	1.5	0.23
27	Biezhentao range	XWQ37	Metagabbro	50.32	0.93	16.86	n.a.	n.a.	7.91	0.12	8	8.73	2.94	1.77	0.23	1.76	99.55	23.8	n.a.	260	33.1	113	n.a.	49.3	920	n.a.	714	13.2	5.14	0.31	88	2.75	6.89	0.71	0.21	17.5	37.2	5.18	22	4.11	1.28	3.45	0.49	2.68	0.52	1.39	0.2	1.3	0.19
28	Biezhentao range	XWQ38	Metagabbro	51.27	0.86	16.53	n.a.	n.a.	7.62	0.12	8.14	8.04	3.4	1.52	0.2	1.86	99.55	24.3	n.a.	388	32.2	111	n.a.	46.4	789	n.a.	550	15.8	7.13	0.44	102	2.93	7.19	1.42	0.52	22.1	46	5.65	22	4.05	1.17	3.62	0.53	3.04	0.64	1.73	0.25	1.66	0.26
43	Biezhentao range	02xw-22a	Amphibolite	51.84	0.84	18.96	n.a.	5.96	n.a.	0.16	2.68	4.68	2.16	7.98	0.24	4.59	100.08	11.47	93.5	23.8	8.47	4.92	24.37	291	708	n.a.	1551	15.77	20.5	1.526	215	5.13	17.98	16.87	2.97	48.5	92.5	9.89	33.9	5.46	1.31	4.45	0.514	3.01	0.574	1.651	0.245	1.751	0.279
44	Biezhentao range	02XW-20a	Amphibolite	61.16	0.77	17.03	n.a.	5.92	n.a.	0.11	2.28	5.43	4.3	2.25	0.23	0.92	100.42	11.82	80.6	23.6	12.59	7.04	21.1	68.9	747	n.a.	894	17.85	18.01	1.471	216	5.05	21.9	15.58	3.67	48.4	83.6	9.82	33.7	5.78	1.391	4.77	0.576	3.21	0.622	1.708	0.26	1.707	0.268
45	Biezhentao range	02XW-04b	Amphibolite	56.23	0.84	17.65	n.a.	7.17	n.a.	0.13	4.48	5.72	3.65	2.18	0.21	1.18	99.43	20.3	140.6	78.9	19.55	28.1	19.7	77.9	616	n.a.	598.7	11.94	8.48	0.566	100	2.39	11.84	2.304	0.7	21.2	40.5	4.88	18.62	3.55	1.088	3.03	0.409	2.38	0.457	1.245	0.176	1.182	0.186
46	Biezhentao range	881053-1	Amphibolite	49.71	1.28	18.16	n.a.	8.43113	n.a.	0.17	5.93	10.31	3.49	0.61	0.27	1.42	99.76	29.74	210	86.2	29	35.5	23.1	13.3	881	n.a.	376	26.4	10.6	0.595	47.3	1.79	10.03	2.32	0.82	24.4	54.8	7.88	32.2	6.77	1.67	5.64	0.838	5.05	0.996	2.76	0.407	2.66	0.391
47	Biezhentao range	881053-6	Amphibolite	55.87	0.87	18.8	4.53	2.12	n.a.	0.15	4.6	6.03	3.75	1.56	0.19	0.2	99.6	18.43	179.2	78.5	24.53	37.16	23.86	38.98	715	n.a.	538.7	16.99	9.14	0.553	96.4	2.474	9.09	3.71	1.232	20.73	42.3	5.11	20.98	4.136	1.263	3.83	0.561	3.073	0.617	1.711	0.238	1.552	0.227
48	Biezhentao range	881053-7	Amphibolite	47.8	0.93	17.66	6.27	2.43	n.a.	0.18	9.2	9.48	2.73	1	0.1	0.19	99.24	36	254	456	39.8	158.8	17.4	36.9	509	n.a.	223.4	18.7	7	0.431	54.4	1.795	6.71	1.472	0.401	11.52	26.4	3.71	17.19	3.83	1.22	3.76	0.612	3.42	0.712	1.85	0.262	1.66	0.258
Intermediate-acid rocks
1	Boluokenu range	QT1	Monzogranite	72.52	0.19	13.65	1.24	0.69	n.a.	0.05	0.38	1.18	3.64	4.26	0.05	1.5	99.35	1.92	6.53	3.68	2.42	2.83	16.5	136	153	4.84	660	12.3	10.8	0.91	177	4.78	20	19.8	2.6	36.9	63.8	6.77	22.4	3.94	0.75	2.37	0.49	2.22	0.45	1.51	0.21	1.45	0.24
2	Boluokenu range	QT2	Monzogranite	72.97	0.18	13.83	0.88	0.64	n.a.	0.04	0.27	1.17	4.13	3.97	0.05	1.36	99.49	1.75	5.72	4.55	1.17	3.04	16.5	130	137	4.11	530	10.1	10.3	1.08	137	3.99	16	16.9	2.88	30.7	51.1	5.51	18.3	2.87	0.69	2.16	0.4	1.89	0.41	1.35	0.21	1.35	0.21
3	Boluokenu range	QT3	Monzogranite	74.58	0.15	13.06	0.52	0.83	n.a.	0.02	0.27	0.61	3.52	4.31	0.04	1.26	99.17	1.7	4.05	9.68	1.02	5.3	16	140	98	3.85	421	8.3	11.2	1.09	142	4.02	13.7	18.3	1.46	30	53.9	5.58	17.9	2.65	0.5	2.13	0.38	1.63	0.3	1.05	0.15	0.94	0.18
4	Boluokenu range	QT4	Monzogranite	70.88	0.25	14.34	0.41	1.65	n.a.	0.06	0.31	1.6	4.28	3.8	0.08	1.83	99.49	2.39	10.4	5.42	1.73	3.53	17.6	129	177	3.64	540	13.3	12.3	1.37	183	5.26	12.9	17.2	2.98	33.5	59.6	6.3	21.3	3.4	0.85	2.66	0.46	2.5	0.51	1.68	0.23	1.82	0.27
5	Boluokenu range	QT5	Monzogranite	73.3	0.18	13.84	0.66	0.86	n.a.	0.04	0.23	1.06	4.25	3.98	0.05	1.18	99.63	1.35	6.02	6.63	1.42	3.66	17.3	133	131	2.98	553	11.3	10.3	1.03	137	4.2	17.4	14.7	3.23	26.3	45.6	5.03	16	2.63	0.61	2.15	0.41	2.14	0.41	1.35	0.18	1.42	0.23
6	Boluokenu range	QT6	Monzogranite	72.94	0.2	13.52	0.7	1.32	n.a.	0.04	0.3	1.22	3.68	4.16	0.06	1.6	99.74	1.77	6.78	4.28	1.63	2.71	16.9	154	141	3.96	470	14.2	12.9	1.42	147	4.35	16.7	16.5	3.43	26.1	48.1	4.8	16.6	2.76	0.69	2.63	0.44	2.55	0.51	1.71	0.25	1.92	0.28
7	Boluokenu range	QT7	Monzogranite	74.83	0.18	13.14	0.48	0.72	n.a.	0.05	0.32	1.22	3.74	4.08	0.04	0.9	99.7	3.13	12	8.11	1.64	4.1	15.7	217	92.4	6.3	192	14.6	16.5	1.59	103	3.35	21.8	27.4	3.73	25.9	45.5	4.65	15.4	2.62	0.53	1.95	0.44	2.23	0.51	1.7	0.25	2.12	0.35
8	Boluokenu range	QT8	Monzogranite	74.77	0.17	12.87	0.56	0.63	n.a.	0.05	0.33	0.93	3.66	4.41	0.04	1.12	99.54	2.96	12.1	7.04	1.52	3.89	15.4	213	105	3.88	271	16.2	23.2	2.42	118	4.28	18.5	28	5.88	28.9	50.5	5.04	16	2.57	0.45	2.21	0.41	2.47	0.54	1.77	0.31	2.52	0.47
9	Boluokenu range	QT9	Monzogranite	75.86	0.12	12.77	0.45	0.4	n.a.	0.04	0.18	0.8	3.51	4.75	0.02	0.87	99.77	2.97	6.27	4.33	0.88	2.47	15.9	232	55	3.79	127	13.8	21.5	2.61	102	4.27	22.4	27.7	7.13	26.3	45.3	4.59	14	2.2	0.31	1.77	0.36	1.93	0.43	1.65	0.27	2.16	0.37
15	Biezhentao range	L08WQ52	Quartz diorite	57.09	1.05	17.35	n.a.	n.a.	6.71	0.11	3.6	6.01	3.93	2.27	0.34	1.1	99.55	14.4	n.a.	73.7	17.8	19.4	n.a.	73.1	1301	n.a.	1138	19.4	14.8	0.61	226	5.65	16.4	14.1	2.71	66.7	110	12.2	44.3	6.9	1.86	6.12	0.78	3.9	0.74	2	0.29	1.91	0.3
16	Biezhentao range	L08WQ53	Quartz diorite	57.85	0.96	17.57	n.a.	n.a.	6.3	0.1	3.48	6.04	3.95	2.05	0.31	0.92	99.55	13.6	n.a.	65.7	16.6	20.4	n.a.	67.3	1356	n.a.	975	23.1	17.4	1.27	222	5.57	16.7	12.1	2.37	60.9	110	12.8	46.4	7.5	1.98	6.5	0.85	4.49	0.86	2.41	0.35	2.32	0.34
17	Biezhentao range	L08WQ63	Quartz diorite	62.49	0.62	17.06	n.a.	n.a.	4.87	0.1	2.12	5	3.86	2.44	0.21	0.76	99.54	9.56	n.a.	39.8	10.4	8.52	n.a.	83.1	977	n.a.	1017	12	11.8	0.95	176	4.77	23.5	15.2	3.09	47.2	73.1	7.8	27	4.12	1.24	3.66	0.46	2.29	0.44	1.22	0.18	1.24	0.2
18	Biezhentao range	L08WQ64	Quartz diorite	65.51	0.5	16.3	n.a.	n.a.	3.59	0.07	1.49	3.6	3.76	3.48	0.15	1.09	99.55	8.22	n.a.	50.8	7.47	6.71	n.a.	94.3	918	n.a.	1891	13.2	11.6	1.13	127	3.57	26.4	10.9	2.79	33.4	55.2	6.3	22.8	3.73	1.21	3.28	0.45	2.4	0.46	1.3	0.19	1.31	0.2
19	Biezhentao range	L08WQ55	Quartz diorite	58.31	1.07	17.55	n.a.	n.a.	6.54	0.09	3.8	3.21	4.44	3.19	0.33	1	99.55	13.3	n.a.	75	15.2	19.2	n.a.	138	763	n.a.	1404	23.7	20.6	1.58	219	5.59	17.5	15.2	2.51	67.8	123	14.1	50.7	7.8	2.1	7.05	0.87	4.54	0.88	2.44	0.36	2.42	0.36
20	Biezhentao range	L08WQ56	Quartz diorite	55.45	1.13	17.48	n.a.	n.a.	6.85	0.11	3.59	5.59	4.22	1.58	0.36	3.26	99.61	14.2	n.a.	73.8	17.7	21	n.a.	53	1166	n.a.	925	22.7	16.2	0.75	215	5.6	14.7	19.9	2.86	79.8	126	14.2	51.3	8.07	2.11	7.01	0.91	4.62	0.88	2.4	0.33	2.15	0.32
29	Biezhentao range	XWQ91	Granodiorite	63.38	0.5	19.45	n.a.	n.a.	2.98	0.05	1.57	3.21	5.71	1.89	0.1	0.7	99.54	4.51	n.a.	38.8	6	8.23	n.a.	142	542	n.a.	1069	3.59	5.53	0.34	77.6	2.12	21.8	4.59	0.74	24.7	45.5	4.98	16.2	1.96	0.75	1.63	0.17	0.7	0.12	0.35	0.05	0.34	0.06
30	Biezhentao range	XWQ92	Granodiorite	59.55	0.77	17.12	n.a.	n.a.	6.9	0.11	3.64	4.84	3.35	2.33	0.17	0.76	99.54	18.2	n.a.	43.4	15.3	13.6	n.a.	204	388	n.a.	622	22	8.35	0.41	126	3.4	10.1	11	0.49	32.6	68.5	8.33	31.1	5.71	1.27	4.84	0.77	4.38	0.88	2.37	0.34	2.15	0.32
31	Biezhentao range	XWQ93	Granodiorite	59.36	0.83	16.78	n.a.	n.a.	7.14	0.1	3.41	4.69	3.07	2.95	0.21	0.98	99.53	21.2	n.a.	54.2	16.7	13	n.a.	334	360	n.a.	853	24.3	9.25	0.43	195	5.04	13	4.86	0.7	21	46.5	6.12	25.3	5.58	1.31	4.89	0.83	4.76	0.97	2.54	0.37	2.34	0.34
32	Biezhentao range	XWQ94	Granodiorite	59.82	0.79	17.14	n.a.	n.a.	6.74	0.11	3.56	4.89	3.35	2.2	0.19	0.76	99.55	23.9	n.a.	46.5	20	16.2	n.a.	126	467	n.a.	771	24	9.29	0.36	167	4.26	11	2.28	0.39	13.7	33	4.75	21	5	1.32	4.7	0.77	4.49	0.92	2.46	0.35	2.21	0.33
33	Biezhentao range	XWQ95	Granodiorite	62.6	0.66	16.66	n.a.	n.a.	5.67	0.09	3.29	3.79	3.45	2.33	0.18	0.82	99.54	20.5	n.a.	70.1	15.1	26.9	n.a.	228	487	n.a.	928	20.8	8.21	0.36	211	5.61	16.1	8.95	0.74	36.6	70.5	8.72	32	5.77	1.33	5.12	0.73	3.91	0.78	2.05	0.29	1.8	0.27
34	Biezhentao range	L08WQ15	Fine-grained diorite	53.73	0.95	18.13	n.a.	n.a.	7.37	0.13	4.34	6.09	3.76	2.08	0.17	2.84	99.59	32.9	n.a.	58.9	28.6	22.9	n.a.	93.3	805	n.a.	584	26.2	11.7	0.71	27.8	1.52	13.9	4.89	2.01	23.3	51.8	6.81	27.3	5.3	1.51	5	0.8	4.8	0.99	2.69	0.4	2.63	0.41
35	Biezhentao range	L08WQ16	Fine-grained diorite	49.03	1.37	18.97	n.a.	n.a.	9.91	0.15	4.84	7.34	3.76	1.82	0.22	2.16	99.57	30	n.a.	41.8	35.3	22.5	n.a.	71.7	847	n.a.	647	26.9	11.5	0.71	96.7	2.81	12.6	2.34	0.64	25	51.6	6.67	27.1	5.41	1.7	5.26	0.84	5.05	1.04	2.89	0.41	2.68	0.4
36	Biezhentao range	L08WQ17	Fine-grained diorite	49.87	1.21	18.77	n.a.	n.a.	9.33	0.15	5.11	7.1	3.63	2.13	0.17	2.13	99.59	35.7	n.a.	45.6	35.9	23.7	n.a.	88.8	820	n.a.	723	28.3	13.3	0.84	127	3.43	13.3	1.94	0.8	21.6	50.2	6.88	28.3	5.75	1.64	5.35	0.87	5.21	1.08	3.05	0.44	2.95	0.44
37	Biezhentao range	L08WQ21	Quartz diorite	57.21	0.68	19.56	n.a.	n.a.	5.38	0.08	3	3.85	4.15	2.39	0.15	3.13	99.6	12.7	n.a.	66.1	22	26.7	n.a.	107	829	n.a.	1043	9.97	5.29	0.28	210	5.46	10.9	2.3	1.4	14.6	26.8	2.98	11.2	2.08	0.85	2.02	0.3	1.76	0.37	1.02	0.15	1.04	0.17
38	Biezhentao range	L08WQ22	Quartz diorite	57.68	0.56	20.51	n.a.	n.a.	4.55	0.08	2.53	4.8	4.45	2.38	0.14	1.88	99.55	12.9	n.a.	73	16.2	19.1	n.a.	100	1186	n.a.	1147	12.3	6.27	0.46	177	4.58	10.7	4.4	1.69	19.2	35.7	3.95	14.7	2.65	1.12	2.59	0.38	2.21	0.45	1.26	0.19	1.27	0.2
39	Biezhentao range	L08WQ23	Quartz diorite	59.51	0.42	20.11	n.a.	n.a.	3.66	0.06	2.21	4	4.9	2.13	0.11	2.49	99.6	9.8	n.a.	60.9	13.7	18.3	n.a.	104	1074	n.a.	799	8.21	3.25	0.18	127	3.25	9.8	2.7	0.93	21.8	33.3	3.19	11	1.78	0.83	1.76	0.26	1.44	0.31	0.84	0.12	0.8	0.14
40	Biezhentao range	L08WQ9	Muscotive-bearing granite	68.73	0.09	17.99	n.a.	n.a.	0.78	0.02	0.45	2.4	5.98	1.37	0.05	1.67	99.54	3.83	n.a.	37.7	1.24	5.06	n.a.	45.9	797	n.a.	397	2.31	1.73	0.15	58.8	1.67	9.47	0.54	0.18	1.67	3.2	0.4	1.58	0.33	0.18	0.32	0.06	0.35	0.08	0.22	0.04	0.25	0.04
41	Biezhentao range	L08WQ10	Muscotive-bearing granite	67.9	0.11	18.64	n.a.	n.a.	0.88	0.03	0.57	2.94	5.95	1.6	0.07	0.83	99.53	4.91	n.a.	42.8	2.19	8.17	n.a.	43.2	1059	n.a.	640	3.48	2.79	0.24	82.8	2.27	13.8	0.31	0.21	1.41	2.59	0.34	1.5	0.39	0.24	0.44	0.08	0.53	0.11	0.34	0.05	0.36	0.06
42	Biezhentao range	L08WQ11	Muscotive-bearing granite	72.38	0.07	16.27	n.a.	n.a.	0.57	0.02	0.34	1.86	5.37	1.53	0.02	1.12	99.54	5.04	n.a.	37.3	1.32	6.08	n.a.	51.3	892	n.a.	66	1.4	1.7	0.12	64.4	1.93	10.3	0.29	0.17	0.9	1.59	0.2	0.71	0.15	0.22	0.15	0.02	0.17	0.04	0.15	0.03	0.18	0.04
49	Biezhentao range	07-8d	Fine-grained foliated diorite	55.8	1.19	16.89	n.a.	n.a.	7.04	0.16	3.37	7.03	4.91	1.88	0.47	1.39	100.16	12.5	113	56	14.3	23..7	22.7	59.6	73	0.85	422	42.6	29.5	2.31	131	3.81	15.5	14.7	3.61	65.4	138	18.52	71.5	13.2	3.03	13.2	1.43	7.77	1.51	4.06	0.57	3.57	0.49
50	Biezhentao range	07-1a	Monzodiorite dyke	55	0.83	20.48	n.a.	n.a.	4.52	0.07	3.11	5.47	5.06	1.8	0.36	1.36	98.04	8.49	82	81	16.2	40.8	25	35	1112	2.72	785	10.9	9.3	0.44	130	2.94	16.5	8.86	1.03	55.8	96.7	9.94	32.2	4.32	1.37	2.98	0.42	2.07	0.41	1.15	0.16	1.02	0.16
51	Biezhentao range	07-1b	Enclave of a foliated gabbro	46.9	1.29	11.65	n.a.	n.a.	11.12	0.19	12.66	9.97	1.7	1.06	0.33	1.41	98.29	39.3	245	846	48.7	21.4	20	32.4	312	1.19	419	24.7	15	0.9	53.4	1.99	3.98	1.16	0.51	20.8	51.4	6.66	27.2	5.82	1.64	5.08	0.76	4.45	0.9	2.46	0.36	2.33	0.35
52	Biezhentao range	07-8c	Amphibolite	58.4	0.42	21.99	n.a.	n.a.	2.76	0.08	1.15	4.06	7.38	2.12	0.33	0.74	99.44	1.28	29.6	28.7	5.22	13.6	23.8	10.5	1009	0.4	1098	2.31	3.13	0.1	106	2.17	23.2	0.21	0.77	1.21	3.68	0.38	1.67	0.41	0.48	0.41	0.06	0.37	0.08	0.25	0.04	0.28	0.05
53	Biezhentao range	PM11-96-HQ2	Diorite	57.09	0.98	16.75	4.5	2.63	n.a.	0.11	4.29	6.29	3.45	1.05	0.25	2.38	99.77	n.a.	149	55.1	20.1	25.5	n.a.	41.7	692	2.9	316	16.8	10	0.79	188	4.9	9.84	4.25	0.61	30.1	58.2	6.43	23.2	4.62	1.21	4.06	0.6	3.22	0.62	1.71	0.26	1.7	0.25
54	Biezhentao range	PM11-102-HQ1	Diorite	50.19	1.13	15.81	5.62	3.25	n.a.	0.16	8.17	8.26	3.02	1.21	0.23	2.68	99.73	n.a.	237	304	35.6	130	n.a.	42.7	686	0.88	431	21.4	10.3	0.85	128	3.99	8.77	2.75	0.8	24.5	55.9	7.14	28.1	5.86	1.6	4.95	0.71	3.9	0.78	2.15	0.34	2.15	0.32
55	Biezhentao range	PM11-22-HQ1	Quartz diorite	59.39	0.94	17.04	3.62	2.54	n.a.	0.12	2.63	6.05	3.92	1.94	0.29	1.3	99.78	n.a.	108	18.1	14.3	13	n.a.	60	782	0.98	1050	19.4	15.8	1.45	218	5.97	17.6	13.7	2.87	42.5	88.2	9.87	35.9	6.11	1.95	5.34	0.82	4.16	0.8	2.19	0.34	2.09	0.34
56	Biezhentao range	PM11-22-HQ2	Quartz diorite	58.96	1	16.99	3.7	2.65	n.a.	0.12	2.69	6.04	3.89	2	0.3	1.42	99.76	n.a.	112	18.1	15.1	9.29	n.a.	36.7	761	0.92	1020	19.3	16.4	1.32	215	6	17.9	14.6	2.86	45.3	87.5	9.88	34.2	6.1	2.02	5.48	0.84	4.26	0.82	2.26	0.35	2.23	0.33
57	Biezhentao range	PM11-22-HQ3	Quartz diorite	59.89	0.93	16.74	3.55	2.42	n.a.	0.12	2.55	5.58	3.62	2.21	0.28	1.9	99.79	n.a.	105	17.5	13.5	8.92	n.a.	36.7	678	1.99	408	18.9	17.6	1.44	207	5.89	20.6	14.7	2.94	44.4	80.9	9.36	33.9	5.65	1.85	5.13	0.85	4.36	0.84	2.36	0.36	2.21	0.35
58	Biezhentao range	PM11-22-HQ4	Quartz diorite	61.91	0.84	16.4	3.12	2.04	n.a.	0.1	2.36	3.94	4.32	2.74	0.24	1.77	99.78	n.a.	83.8	18.4	12.4	9.08	n.a.	81.4	648	2.03	1240	17.4	16.8	1.32	214	5.76	19.9	16	3.16	46.2	81.8	9.37	33.1	5.42	1.9	4.73	0.74	3.54	0.68	1.78	0.26	1.65	0.26
59	Biezhentao range	D1073-YQ1	Quartz diorite	61.7	1	16.06	3.18	1.89	n.a.	0.09	2.75	4.96	3.69	2.73	0.27	1.46	99.78	n.a.	104	45.8	14.4	23.9	n.a.	99.8	960	4	1020	25.7	17.8	1.26	208	5.57	20.1	15.8	3.09	55.2	106	12.1	42.1	7.84	1.94	6.37	0.92	5.12	1	2.78	0.42	2.68	0.41
60	Biezhentao range	D1073-YQ2	Quartz diorite	60.24	1.04	16.72	3.2	2.11	n.a.	0.09	3.05	4.88	4.07	2.65	0.29	1.43	99.77	n.a.	114	52	15.8	29	n.a.	93.1	1120	2.36	1010	20.9	18	1.24	198	5.22	19.6	13.7	3.07	55.9	104	11.3	40.8	6.86	2.15	5.53	0.83	4.31	0.85	2.26	0.33	2.01	0.31
61	Biezhentao range	D1073-YQ3	Quartz diorite	60.06	1.06	16.36	3.38	2.06	n.a.	0.1	3.14	4.8	3.95	2.89	0.3	1.68	99.78	n.a.	115	53	15.9	20.7	n.a.	84.9	995	3.05	1100	20.1	17.7	0.17	186	4.97	18.2	14.3	3.05	57.7	102	11.3	40.2	6.72	2.05	5.45	0.83	4.13	0.79	2.16	0.33	2.05	0.31
62	Biezhentao range	D1073-YQ4	Quartz diorite	60.36	1.01	16.57	3.2	1.96	n.a.	0.09	2.96	4.65	4.05	3.01	0.28	1.64	99.78	n.a.	109	49.5	15.5	23.4	n.a.	98.1	1080	3.58	1270	19.8	17.1	1.14	192	5.06	18.2	13.2	3.12	56	101	10.9	39.3	6.6	2.13	5.29	0.79	3.89	0.76	2.12	0.3	1.9	0.29
63	Biezhentao range	PM18-22-YQ1	Diorite	50.38	1.04	16.58	6.25	2.59	n.a.	0.15	6.97	9.45	3.5	0.76	0.28	1.8	99.75	n.a.	278	153	28.7	44.8	n.a.	34.2	760	0.97	179	21.8	8.72	0.69	107	3.2	7.27	1.76	0.7	20.2	46.6	6.3	26.9	6.76	1.53	5.06	0.75	4.13	0.8	2.2	0.34	2.19	0.34
64	Biezhentao range	PM18-22-YQ2	Diorite	50.6	1.06	16.67	6	2.6	n.a.	0.14	6.86	9.28	3.58	0.82	0.28	1.93	99.82	n.a.	267	146	28.2	43.5	n.a.	25.4	789	0.98	198	22.8	7.68	0.57	99.6	2.88	6.91	1.84	0.55	20.2	45.8	6.2	26	5.52	1.44	5	0.72	4.03	0.81	2.22	0.32	2.06	0.31
65	Biezhentao range	PM18-63-YQ1	Quartz diorite	52.76	1.09	15.35	6.85	2.12	n.a.	0.18	6.95	7.72	1.99	1.75	0.16	2.86	99.78	n.a.	289	60.3	25.8	9.8	n.a.	82.2	347	1.86	372	34.9	13.4	0.96	116	3.31	7.75	3.36	0.77	27.4	64	8.47	33.7	6.94	1.48	6.37	1	6.07	1.24	3.57	0.54	3.51	0.54
66	Biezhentao range	PM18-63-YQ2	Quartz diorite	52.94	0.93	15.98	6.3	1.91	n.a.	0.17	6.42	7.67	2.46	2.12	0.13	2.74	99.77	n.a.	254	55.2	22.6	7.38	n.a.	90.4	360	1.86	441	32.3	12.1	0.85	111	3.18	9.58	2.27	0.67	22.1	55.3	7.42	30.5	6.62	1.42	6.05	0.99	5.83	1.2	3.39	0.52	3.3	0.5
67	Biezhentao range	PM18-63-YQ3	Quartz diorite	52.14	1.07	15.36	7.05	2.08	n.a.	0.18	7.27	7.87	2.07	1.74	0.14	2.79	99.76	n.a.	288	61.5	27.2	8.97	n.a.	74.4	356	1.77	360	36.7	13.2	0.93	103	3.15	7.79	2.6	0.75	25.7	54	8.54	34.4	7.34	1.58	6.87	1.12	6.73	1.38	3.9	0.61	4.05	0.6
420-380Ma magmatic rocks
Intermediate-acid rocks
1	Boluokenu range	KQ1	Monzogranite	75.82	0.19	12.35	0.2	0.81	n.a.	0.03	0.19	0.8	3.32	4.77	0.03	0.96	99.47	1.61	7.53	3.5	1.03	2.8	16.4	207	59.8	3.27	224	16.4	32.8	3.02	150	4.67	19	27.7	8.51	42.6	72	7.08	21.3	3.11	0.47	2.5	0.51	2.75	0.53	1.99	0.31	2.01	0.38
2	Boluokenu range	KQ2	Monzogranite	75.64	0.18	12.41	0.27	0.76	n.a.	0.03	0.21	0.64	3.33	4.75	0.03	1.11	99.36	2.02	7.95	4.35	1.17	2.83	17.3	214	54.6	3.7	233	16.4	35	4.06	123	4.39	22.4	30.4	7.29	46.4	77.6	7.69	22.9	3.72	0.52	2.85	0.51	2.9	0.56	2.08	0.34	2.54	0.39
3	Boluokenu range	KQ3	Monzogranite	75.82	0.19	12.44	0.34	0.67	n.a.	0.02	0.18	0.74	3.34	4.74	0.04	1.17	99.69	2.28	8.32	4.74	0.91	2.56	17.1	206	54.5	2.65	237	19	35.8	3.64	137	4.61	17.1	25	4.48	44.4	77.3	7.86	24.3	3.98	0.52	3.18	0.57	3.27	0.68	2.41	0.34	2.59	0.43
4	Boluokenu range	KQ4	Monzogranite	75.79	0.18	12.5	0.23	0.73	n.a.	0.03	0.2	0.64	3.32	4.93	0.04	0.92	99.51	2.05	7.8	6.46	1.02	3.67	16.6	201	54.4	2.89	241	18.8	34.8	3.6	139	4.34	23.4	40.2	8.39	39.4	64.7	7.18	22.9	3.63	0.46	2.78	0.54	3.04	0.63	2.29	0.35	2.76	0.4
5	Boluokenu range	KQ5	Monzogranite	75.75	0.2	12.31	0.23	0.82	n.a.	0.03	0.2	0.96	3.25	4.64	0.04	1.42	99.85	2.17	8.52	5.65	1.19	3.85	16.4	199	61.8	2.79	221	15.7	32.4	3.2	138	4.35	16.8	27.9	4.56	41.8	72.3	7.01	21.7	3.35	0.41	2.54	0.49	2.7	0.6	1.96	0.28	2.25	0.34
6	Boluokenu range	KQ6	Monzogranite	76.25	0.16	12.21	0.23	0.6	n.a.	0.03	0.16	0.73	3.12	4.79	0.03	1.21	99.52	2.07	5.83	11.4	0.98	5.93	15.8	198	42.2	2.55	205	16	32.2	3.31	116	4.22	16.1	22.9	5.39	41.3	69.7	6.93	20.8	3.03	0.45	2.52	0.49	2.71	0.55	1.96	0.28	2.34	0.35
7	Boluokenu range	KQ7	Monzogranite	75.18	0.21	12.67	0.34	0.83	n.a.	0.03	0.25	0.79	3.57	4.57	0.05	0.89	99.38	3.1	9.22	4.25	1.19	3.01	17	197	68.1	2.63	265	17.1	33.2	3.11	167	4.95	17	21.1	3.99	39.3	69.5	7.03	22	3.48	0.58	2.82	0.51	2.74	0.62	2.12	0.31	2.39	0.37
8	Boluokenu range	KQ8	Monzogranite	75.68	0.18	12.37	0.27	0.61	n.a.	0.04	0.18	1.02	2.95	4.87	0.03	1.62	99.82	1.97	7.7	9.47	0.81	5.01	17.2	215	47	2.69	248	16.5	36.6	3.68	107	3.74	16.8	29.3	3.63	40.3	71.3	7.04	21.2	3.65	0.52	2.9	0.5	2.6	0.57	2.11	0.32	2.37	0.39
9	Boluokenu range	KQ9	Monzogranite	75.37	0.2	12.5	0.27	0.78	n.a.	0.03	0.19	0.86	3.23	4.82	0.04	1.31	99.6	2.31	9.01	2.85	1.04	2.41	17.6	232	60.4	3.19	239	19.3	37.1	3.68	147	4.69	19.1	32.6	4.55	44.3	77.4	7.68	23.4	3.58	0.6	3.25	0.59	2.99	0.63	2.29	0.36	2.62	0.45
10	Boluokenu range	KQ10	Monzogranite	75.61	0.2	12.6	0.34	0.68	n.a.	0.03	0.22	0.8	3.32	4.7	0.04	1.22	99.76	2.12	8.38	3.01	0.98	2.36	16.6	197	57.5	2.44	237	15	30.9	2.88	123	3.89	15.4	25.8	4.28	39.7	68.7	6.66	20.4	3.1	0.48	2.59	0.49	2.35	0.57	1.87	0.28	2.17	0.32
11	Boluokenu range	TX2	K-feldspar granite	70.53	0.35	14.59	0.84	0.74	n.a.	0.03	0.73	1.46	3.35	5	0.08	2.03	99.73	4.35	29.2	6.98	3.15	5.06	18.8	251	232	5.99	523	31.8	26.5	2.86	218	6.22	14.8	35.6	5.92	80.1	142	14.8	48.5	7.51	1.16	6.6	1.19	6.06	1.22	4.18	0.52	3.75	0.59
12	Boluokenu range	TX3	K-feldspar granite	70.46	0.39	14.59	0.99	1.24	n.a.	0.04	0.86	1.19	3.22	4.9	0.08	2.27	100.23	5.08	34.5	9.18	3.87	6.47	20.3	242	233	5.25	458	32.3	29.3	2.98	236	7.03	17.4	50.1	9.2	56.8	109	12	39.3	7.19	1.2	6.11	1.13	6.28	1.22	3.98	0.53	3.72	0.56
13	Boluokenu range	TX4	K-feldspar granite	71.95	0.34	14.58	0.92	0.51	n.a.	0.03	0.67	1	3.6	4.84	0.07	1.43	99.94	4.16	30.9	7.96	5.32	6.29	19.5	220	254	3.48	483	29	26.3	2.84	211	6.13	27.2	44.4	10.1	70.6	132	14.6	47.9	8.08	1.2	6.74	1.15	5.6	1.09	3.34	0.46	3.27	0.51
14	Boluokenu range	TX5	K-feldspar granite	72.35	0.3	13.74	1.1	0.79	n.a.	0.03	0.54	1.31	3.12	5.22	0.06	1.2	99.76	4.38	23.3	5.97	2.8	5.03	18.6	271	173	3.45	384	34.2	29.1	3.83	165	5.52	24	54.7	9.67	55	102	11.3	38	7.2	0.97	6.22	1.13	6.16	1.21	4.03	0.54	4.03	0.6
15	Boluokenu range	TX6	K-feldspar granite	71.86	0.33	14.17	0.77	1.15	n.a.	0.03	0.58	1.22	3.19	5.18	0.07	1.29	99.84	4.79	28.9	5.82	3.62	5.05	18.5	236	243	3.92	435	29.9	27.1	3.22	199	6.28	25.8	47.8	9.43	65.2	121	13.3	42.7	7.48	1.01	5.94	1.12	5.86	1.12	3.74	0.52	3.53	0.54
16	Boluokenu range	TX7	K-feldspar granite	72.63	0.29	13.73	0.66	1.03	n.a.	0.03	0.53	1.37	3.05	5.28	0.05	1.13	99.78	4.81	21.4	5.11	2.64	4.82	18.2	275	166	3.37	375	34.6	29.1	3.74	227	7.05	23.8	54.6	9.8	83.5	152	15.8	50.2	8.15	1	6.57	1.27	6.16	1.27	4.26	0.59	4.06	0.63
17	Boluokenu range	TX8	K-feldspar granite	70.32	0.33	14.37	1.02	1.14	n.a.	0.04	0.64	1.65	3.19	5.17	0.07	1.61	99.55	5.49	29.8	17.2	4	9.66	18.4	242	252	4.06	459	28.9	23.3	2.68	210	6.66	25.6	47.3	7.52	46.5	86.2	9.71	32.8	6.16	1.05	5.55	0.96	5.35	1.06	3.42	0.49	3.35	0.5
18	Boluokenu range	TX9	K-feldspar granite	72.28	0.32	13.83	0.88	1.07	n.a.	0.03	0.65	1.31	3.14	5.03	0.07	1.29	99.9	4.91	27.2	4.74	2.25	3.7	17.8	253	155	3.35	340	34.5	27.6	4.22	183	6.12	23.4	65.1	15.9	68.8	129	13.9	47.2	8.53	1.01	7.1	1.27	6.56	1.29	4.09	0.6	4.36	0.62
19	Biezhentao range	C14BL60	Monzogranites	76.1	0.05	12.75	n.a.	n.a.	1.06	0.01	0.12	0.64	4.28	3.85	0.02	0.43	99.3	6.84	4.08	6.57	0.82	1.79	23.8	206	68.1	1.22	109	84.2	33.3	2.1	123	5.47	24.6	26	2.68	8.51	20	2.55	11.4	4.57	0.13	6.43	1.7	13.1	3.07	9.61	1.6	10.7	1.51
20	Biezhentao range	C14BL61	Monzogranites	76.8	0.02	12.95	n.a.	n.a.	0.82	0.01	0.04	0.43	5.88	2.06	0.01	0.44	99.5	5.42	2.37	4.39	0.526	1.74	23.8	127	60.7	1.48	43.9	59.6	40.5	3.25	77.4	4.83	13.6	19	3.27	4.29	11	1.39	5.5	2.35	0.02	3.42	1.01	8.28	2	6.66	1.26	8.88	1.28
21	Biezhentao range	C14BL62	Monzogranites	77.9	0.04	12.5	n.a.	n.a.	0.16	0.01	0.02	0.43	4.4	3.92	0.02	0.22	99.6	4.77	2.87	6.36	0.186	2.07	20.3	219	34.2	4.3	85	72.3	27.99	3.14	110	5.21	22.1	21.4	1.98	8.04	17.5	2.59	11.7	4.47	0.12	6.21	1.59	11.9	2.65	8.37	1.41	9.29	1.34
22	Biezhentao range	C14BL63	Monzogranites	75.9	0.06	13	n.a.	n.a.	1.25	0.01	0.11	0.46	5.15	3.03	0.02	0.45	99.4	5.77	4.25	5.92	1.83	1.53	22.4	156	53.1	3.12	84.2	67.3	29.25	2.9	117	5.54	20.1	24.5	2.77	10.9	20.1	3.1	12.7	4.39	0.12	5.41	1.44	10.6	2.6	8.22	1.48	10.4	1.46
23	Biezhentao range	LMSW1-H1	Granodiorite porphyry	63.33	0.51	16.12	0.46	n.a.	2.12	0.07	1.81	5.93	4.58	1.75	0.18	2.92	99.78	6	45	20	5	7	19.7	68.7	830	7.31	218	19	5.9	0.5	142	4.4	8	6.6	1.79	13.8	32.2	4.11	15.5	3.48	0.95	3.06	0.59	3.3	0.73	2.08	0.37	2.01	0.33
24	Biezhentao range	LMSW1-H2	Granodiorite porphyry	62.6	0.52	16.48	0.29	n.a.	2.32	0.06	1.69	6.68	4.69	1.56	0.15	2.07	99.11	9	60	30	5	11	20.8	69.8	788	7.5	203	20.1	8.7	0.6	194	5.5	6	6.71	2.1	16.1	40.9	5.28	20.4	4.69	1.11	4.42	0.8	4.27	0.91	2.64	0.45	2.65	0.41
25	Biezhentao range	LMSW1-H3	Granodiorite porphyry	63.38	0.48	16.63	0.44	n.a.	2.47	0.06	1.97	6.38	4.76	1.75	0.17	2.05	100.54	8	47	50	4	9	19.7	64.1	837	7.35	159.5	18.5	7.8	0.6	154	4.7	4	6.33	2.72	17.3	42.6	5.41	20.9	4.95	1.07	4.53	0.89	4.93	1.05	3.01	0.48	2.92	0.48
26	Biezhentao range	LMSW1-H4	Granodiorite porphyry	64.29	0.42	16.24	0.38	n.a.	2.35	0.05	1.91	5.67	4.81	1.84	0.13	1.88	99.97	5	36	30	4	6	18.9	59.5	469	2.88	174	14.2	6	0.5	127	4.2	9	7.27	1.77	15	35	4.29	15.5	3.21	1.02	2.65	0.51	2.4	0.56	1.55	0.27	1.47	0.24
27	Biezhentao range	LMSW1-H5	Granodiorite porphyry	64.12	0.47	14.91	0.47	n.a.	2.15	0.04	1.62	6.19	3.88	1.91	0.08	3.73	99.57	5	30	50	5	6	17.3	50.5	648	4.22	133.5	14	5.7	0.6	107	3.8	4	7.12	2.17	14.1	31.4	3.81	13.6	3.06	0.76	2.35	0.47	2.4	0.59	1.5	0.27	1.62	0.3
28	Biezhentao range	LMSW1-H6	Granodiorite porphyry	65.22	0.35	16.48	0.31	n.a.	2.71	0.04	1.98	5.53	4.04	1.48	0.08	1.89	100.11	8	43	50	5	8	19.4	68.3	834	8.31	198.5	19.6	7.7	0.6	156	4.6	6	6.87	2.35	16.7	41.4	5.11	19.6	4.58	0.99	4.53	0.8	4.61	0.96	2.76	0.5	2.6	0.4
29	Biezhentao range	LMSW2-H1	Granite porphyry	64.93	0.4	15.33	0.35	n.a.	2.02	0.06	1.65	5.97	4.59	1.82	0.11	2.14	99.37	6	32	30	6	6	19.4	62.7	629	5.54	215.6	17.9	6.8	0.6	128	4.1	6	7.01	1.86	16.3	37.4	4.51	16.7	3.65	0.88	3.27	0.61	3.26	0.72	2.01	0.34	2.01	0.33
30	Biezhentao range	LMSW2-H2	Granite porphyry	66.48	0.34	15.42	0.41	n.a.	2.62	0.06	2.18	5.06	4.8	2.08	0.09	1.53	101.07	5	32	10	8	4	24.7	68.1	239	1.81	43.9	18.1	6.1	0.5	118	3.5	4	6.92	1.39	15.4	32.2	3.87	14	2.88	0.87	2.55	0.45	2.51	0.55	1.59	0.25	1.56	0.26
31	Biezhentao range	LMSW2-H3	Granite porphyry	66.83	0.42	15.21	0.53	n.a.	2.08	0.05	1.74	4.32	5.38	1.82	0.09	1.22	99.69	5	29	20	6	4	19	76.3	742	7.65	297	19.9	6.7	0.6	108	3.6	6	7.1	1.25	16.1	35.6	4.18	14.9	3.12	0.76	2.66	0.53	2.61	0.6	1.58	0.28	1.49	0.26
32	Biezhentao range	LMSW2-H4	Granite porphyry	67.09	0.32	15.47	0.52	n.a.	2.62	0.05	1.91	4.22	4.96	2.09	0.09	1.03	100.37	5	24	20	5	4	17	78.6	558	4.91	351	18.9	6.6	0.6	115	3.5	8	7.15	1.84	18.4	43	4.98	17.7	3.46	0.72	3.24	0.54	3.14	0.67	1.88	0.31	2.01	0.32
33	Biezhentao range	LMSW2-H5	Granite porphyry	64.58	0.41	15.52	0.31	n.a.	3.05	0.11	1.86	5.53	4.77	1.44	0.09	2.48	100.15	5	29	20	9	6	18.6	83.1	300	3.24	221	22.3	6.5	0.6	129	3.7	5	7.68	1.31	19.3	40.1	4.45	16.2	3.3	0.72	2.94	0.54	2.86	0.63	1.72	0.31	1.91	0.3
34	Biezhentao range	LMSW2-H6	Granite porphyry	67.47	0.51	15.45	0.65	n.a.	2.36	0.05	1.86	3.63	4.75	2.5	0.09	1.22	100.54	5	36	20	6	3	18.3	81.4	765	5.77	372	22.2	6.5	0.6	134	4	6	7.39	1.73	17.1	36.4	4.17	15.4	3.45	0.75	3	0.54	2.86	0.64	1.78	0.29	1.85	0.3
35	Biezhentao range	LM1-7	Quartz monzodiorite	63.5	0.31	17.19	2.04	0.93	n.a.	0.03	1.45	6.14	3.45	2.62	0.1	1.56	99.33	5.93	29.1	7.17	4.58	6.38	17.96	70	553	5.63	251	15.17	5.48	0.44	116.38	3.43	n.a.	6.9	0.89	37.34	66.6	7.5	25.36	3.83	0.89	3.29	0.49	2.74	0.55	1.49	0.24	1.62	0.26
36	Biezhentao range	LM2-2	Quartz monzodiorite	63.62	0.44	18.34	1.61	0.6	n.a.	0.04	1.77	4.58	3.78	3.67	0.11	1.78	100.3	4.95	32.7	8.16	5.44	6.39	18.42	121	615	3.67	397	12.9	4.5	0.41	75.68	2.55	n.a.	3.74	0.71	12.63	24.41	3.04	11.59	2.43	0.87	2.25	0.38	2.19	0.45	1.19	0.2	1.3	0.22
37	Biezhentao range	LM2-3	Quartz monzodiorite	59.77	0.39	18.77	1.61	0.49	n.a.	0.03	1.49	3.94	6.09	2.78	0.1	4.09	99.57	4.82	30.9	8.71	3.8	6.06	15.78	81	363	1.62	275	15.43	5	0.47	117.3	3.3	n.a.	3.93	0.52	12.48	25.8	3.35	13.22	2.72	0.46	2.59	0.45	2.68	0.54	1.54	0.26	1.69	0.29
38	Biezhentao range	LM2-4	Quartz monzodiorite	63.94	0.4	17.56	1.83	0	n.a.	0.04	1.74	5.01	3.85	3.28	0.12	1.67	99.45	5.65	31.2	9.52	4.38	7.01	17.19	99	605	2.11	366	16.63	4.59	0.39	83.84	2.89	n.a.	4.12	0.74	12.22	27.11	3.59	14.25	2.94	0.84	2.84	0.49	2.91	0.58	1.56	0.26	1.7	0.27
39	Biezhentao range	LM2-5	Quartz monzodiorite	63.92	0.45	18.25	1.38	0.43	n.a.	0.04	1.85	5.22	3.45	2.97	0.11	1.66	99.74	5.38	32.3	9.07	4.12	6.98	18.51	102	755	2.81	294	15.39	5.12	0.45	91.09	3.11	n.a.	4.27	0.78	13.89	31.28	4.02	15.25	2.95	0.93	2.79	0.45	2.68	0.54	1.48	0.25	1.65	0.26
40	Biezhentao range	LM1-4	Quartz mica dioritic porphyry	67	0.43	16.38	0.74	0.19	n.a.	0.02	1.94	3.22	2.99	3.91	0.13	3.48	100.44	6.12	41.1	7.62	1.2	4.3	19.81	117	533	20.62	366	18.24	6.57	0.59	133.42	3.94	n.a.	7.04	1.58	20.69	43.22	5.56	21.54	4.02	0.85	3.41	0.56	3.25	0.64	1.74	0.3	1.87	0.3
41	Biezhentao range	LM1-5	Quartz mica dioritic porphyry	68.11	0.41	16.38	1.24	1.5	n.a.	0.02	1.61	1.58	3.33	3.35	0.13	2.09	99.73	5.89	43.3	11.25	6.53	10.44	20.16	122	687	20.86	298	16.9	6.39	0.57	129.54	3.82	n.a.	5.55	1.14	12.43	24.36	3.43	13.49	2.94	0.98	2.69	0.47	2.77	0.58	1.59	0.28	1.81	0.29
42	Biezhentao range	LM1-6	Quartz mica dioritic porphyry	67.6	0.42	16.3	0.79	0.27	n.a.	0.02	1.82	3.38	3.62	3.48	0.13	1.51	99.34	6.24	41	9.98	1.81	14.4	19.38	104	808	9.32	383	17.46	6.88	0.59	135.15	3.95	n.a.	7.36	1.48	19.18	41.2	5.34	20.67	3.95	0.97	3.43	0.55	3.09	0.61	1.66	0.27	1.82	0.28
43	Biezhentao range	LM1-8	Quartz mica dioritic porphyry	69.4	0.29	16.01	1.49	0.83	n.a.	0.02	1.18	2.55	3.59	2.51	0.1	1.61	99.57	4.68	25.6	5.17	4.07	5.56	19.89	71	504	4.67	263	15.58	6.97	0.74	118.22	3.85	n.a.	6.57	0.99	16.55	31.81	3.75	13.61	2.67	0.71	2.5	0.44	2.59	0.53	1.5	0.25	1.74	0.27
44	Biezhentao range	LM1-9	Quartz mica dioritic porphyry	69.88	0.28	16.13	1.2	0.9	n.a.	0.02	1.12	3.01	3.86	1.99	0.09	1.64	100.12	4.88	27.3	4.72	3.57	5.45	19.71	58	518	3.59	216	17.58	6.89	0.72	115.57	3.85	n.a.	6.98	1.11	15.72	31.71	3.88	14.61	2.9	0.72	2.73	0.49	2.93	0.61	1.68	0.29	1.95	0.31
45	Biezhentao range	LM1-11	Quartz mica dioritic porphyry	68.48	0.33	16.46	1.5	0.65	n.a.	0.02	1.37	2.39	3.67	2.84	0.1	1.77	99.59	5.16	30.5	4.81	4.44	7.42	19.48	84	584	5.72	372	18.86	8.5	0.69	134.54	4.01	n.a.	8.2	1.08	25.21	48.06	5.63	20.6	3.83	0.83	3.46	0.56	3.23	0.66	1.78	0.29	1.98	0.32
46	Biezhentao range	LM1-1	Granodiorite porphyry	69.26	0.27	16.16	1.48	0.58	n.a.	0.02	1.24	2.02	3.72	2.77	0.1	1.78	99.41	4.4	24.3	2.36	3.31	3.7	17.6	98	396	9.22	397	17.4	7.25	0.7	124.54	3.83	n.a.	7.04	1.42	16.36	32.09	3.92	14.61	2.82	0.74	2.76	0.47	2.88	0.58	1.62	0.28	1.85	0.3
47	Biezhentao range	LM1-2	Granodiorite porphyry	68.78	0.31	16.67	1.04	0.47	n.a.	0.01	1.28	3.54	3.16	2.93	0.1	1.38	99.67	5.34	28.9	6.44	3.34	5.7	18.36	80	522	5.07	385	18.3	7.85	0.71	127.3	3.89	n.a.	7.9	1.4	18.76	36.66	4.34	16.12	3.22	0.84	3.06	0.51	3.09	0.62	1.71	0.3	1.96	0.33
48	Biezhentao range	LM1-3	Granodiorite porphyry	67.97	0.42	16.45	1.04	0.77	n.a.	0.02	1.92	1.64	2.77	4.51	0.14	2.41	100.08	6.35	41.7	6.26	4.58	6.05	20.82	133	495	27.74	428	17.14	6.46	0.58	134.54	3.98	n.a.	7.16	1.76	19.71	41.98	5.44	20.78	3.95	0.84	3.38	0.54	3.13	0.6	1.65	0.27	1.83	0.29
49	Biezhentao range	LM1-10	Granodiorite porphyry	69.92	0.29	16.15	0.76	0.31	n.a.	0.01	1.11	3.89	3.89	2.5	0.09	1.15	100.06	4.81	22.2	2.81	1.88	4.56	18.65	68	616	6.7	238	16.47	6.96	0.69	117.71	3.74	n.a.	6.36	1.06	9.51	22.51	3.23	12.76	2.8	0.66	2.59	0.46	2.75	0.55	1.57	0.27	1.8	0.28
50	Biezhentao range	LM2-1	Granodiorite porphyry	69.11	0.27	15.98	1.53	0.58	n.a.	0.02	1.16	2.23	3.05	3.53	0.08	2.25	99.81	4.07	23	4.9	4.26	4.53	16.56	113	322	3.03	385	18.72	5.7	0.54	104.96	3.31	n.a.	6.45	1.11	18.96	36.85	4.54	16.97	3.42	0.67	3.08	0.55	3.24	0.65	1.75	0.31	2	0.32
51	Biezhentao range	D18-01	Granodiorite porphyry	67.55	0.29	15.71	1.11	n.a.	1.18	0.06	1.13	2.82	2.57	6.28	0.1	1.72	99.38	5.22	27.1	38.6	2.45	17.2	16.9	170	489	11.1	534	16	7.36	0.76	122	3.36	162	8.11	1.73	17.82	37.16	4.29	16.13	3.3	0.65	3.03	0.46	2.92	0.61	1.76	0.26	1.75	0.26
52	Biezhentao range	D19-01	Granodiorite porphyry	61.13	0.34	18.13	1.23	n.a.	1.61	0.05	1.28	3.52	5.43	4.57	0.09	3.64	99.76	4.75	33	16.1	2.85	12	14.9	135	449	6.19	986	17.3	7.63	0.61	106	2.58	13.14	8.51	1.56	20.24	41.52	4.88	18.27	3.79	0.74	3.33	0.52	3.16	0.63	1.86	0.27	1.81	0.28
53	Biezhentao range	D19-02	Granodiorite porphyry	68.54	0.31	15.31	1.81	n.a.	2.23	0.05	1.35	1.65	2.74	5.13	0.1	1.9	99.28	5.1	23	14.5	3.89	8.45	16.7	171	441	8.32	397	19.6	9.72	0.92	113	3.14	28.07	8.94	1.87	18.84	39.43	4.72	17.94	3.77	0.71	3.57	0.59	3.62	0.73	2.13	0.33	2.06	0.32
54	Boluokenu range	YM2-1	Andesite	61.75	0.87	17.1	n.a.	n.a.	6.42	0.11	2.08	4.86	3.5	1.67	0.12	n.a.	98.48	n.a.	n.a.	n.a.	n.a.	n.a.	n.a.	50.96	308.1	n.a.	355.7	14.62	7.74	0.32	283.1	7.62	n.a.	5.94	n.a.	21.29	41.84	5.46	21.17	4.1	1.25	4.24	0.71	4.38	0.9	1.6	0.27	2.81	0.42
55	Boluokenu range	YM4	Andesite	61.09	0.88	17.16	n.a.	n.a.	6.37	0.09	2.19	5.31	3.72	1.78	0.12	n.a.	98.71	n.a.	n.a.	n.a.	n.a.	n.a.	n.a.	24.59	320	n.a.	320	22.2	7.76	0.76	297.6	7.68	n.a.	6.05	n.a.	19.57	41.37	5.31	21.97	4.28	1.31	4.34	0.73	4.69	0.93	2.62	0.41	3.06	0.46
56	Boluokenu range	JX1-1	Andesite	62.69	0.95	17.29	n.a.	n.a.	5.69	0.07	1.35	5.75	3.23	1.65	0.13	n.a.	98.8	n.a.	n.a.	n.a.	n.a.	n.a.	n.a.	35.67	204.5	n.a.	334.2	24.19	8.07	0.6	315.3	8	n.a.	5.75	n.a.	18.61	42.46	5.25	21.8	4.48	1.3	4.15	0.74	4.65	0.91	2.74	0.44	3	0.42
57	Boluokenu range	JX3-1	Andesite	62.49	0.8	17.28	n.a.	n.a.	6.04	0.09	1.38	4.19	4.15	1.76	0.13	n.a.	98.31	n.a.	n.a.	n.a.	n.a.	n.a.	n.a.	26.94	265.7	n.a.	430.9	22.69	8.24	0.63	311.4	8.19	n.a.	6.1	n.a.	18.92	38.18	5.49	20.94	4.5	1.32	4.38	0.75	4.7	1	2.72	0.42	2.96	0.47
58	Biezhentao range	D20-01	Tonalite porphyry	67.62	0.33	16.07	1.81	n.a.	2.15	0.05	1.36	2.12	3.23	4.45	0.1	1.66	99.11	5.11	27.7	11	5.07	5.9	18	160	639	9.8	423	15.1	6.94	0.66	123	3.22	24.95	7.12	1.69	16.8	35.59	4.23	16.33	3.29	0.73	3.05	0.47	2.84	0.57	1.65	0.25	1.62	0.24
59	Biezhentao range	D20-02	Tonalite porphyry	67.43	0.35	16.13	1.97	n.a.	2.21	0.05	1.36	3.58	4.76	1.97	0.13	1.5	99.4	5.27	23.4	9.27	4.38	5.6	16.4	58.1	372	3.45	186	14.5	26.9	1.64	117	3.09	5.08	6.88	1.27	15.51	33.27	3.97	15.43	3.18	0.74	2.93	0.45	2.7	0.56	1.6	0.25	1.53	0.24
60	Biezhentao range	TS35-3	Rhyolite	68.1	0.76	12.7	n.a.	4.63	n.a.	0.08	1.62	4.8	2.66	1.43	0.16	2.49	99.57	n.a.	n.a.	33	n.a.	n.a.	18.15	70	241	2.7	270	30.4	16.2	1.16	191.5	5.5	19.1	12.4	3.5	31.1	68.1	7.64	29.5	5.93	1.34	5.8	0.85	4.97	1	2.93	0.42	2.75	0.4
61	Biezhentao range	TS35-4	Andesite tuff	61	1	13.6	n.a.	5.61	n.a.	0.1	2.99	4.41	2.01	2.71	0.24	5.54	99.25	n.a.	n.a.	11	n.a.	n.a.	15.85	113	105.5	23	340	24.7	12	1	160.5	4.5	17.4	8	3.3	21.9	50.4	5.46	21.6	4.55	1.2	4.72	0.71	4.2	0.84	2.5	0.36	2.41	0.36
62	Biezhentao range	TS35-5	Andesite tuff	61.5	0.58	18.75	n.a.	3.39	n.a.	0.08	4.81	0.58	1.8	3.11	0.1	5.27	100.1	n.a.	n.a.	3	n.a.	n.a.	23.9	61.5	38.2	26.8	440	26.9	16.3	1.42	293	9	22.3	9.6	1.2	19.1	50.4	6	24.3	5.18	1.25	5.42	0.83	5.1	1.05	3.3	0.5	3.42	0.53
63	Biezhentao range	TS35-6	Andesite tuff	61.5	0.56	18.05	n.a.	3.2	n.a.	0.09	4.79	0.48	2.09	3.17	0.08	5.2	99.34	n.a.	n.a.	3	n.a.	n.a.	21.8	62.7	35.7	32.3	460	32.4	16.7	1.36	296	8.8	25.8	8.7	1.3	15.4	39.8	4.51	18.9	4.63	1.2	5.5	0.92	5.72	1.2	3.76	0.56	3.76	0.6
64	Biezhentao range	TS35-7	Basaltic trachyandesite	53.5	0.78	15.25	n.a.	6.52	n.a.	0.1	4.09	5.71	3.74	1.36	0.17	7.05	101.15	n.a.	n.a.	62	n.a.	n.a.	19.1	57.7	230	3.52	70	21.8	6.7	0.51	150.5	4.1	11.1	5.5	1.4	18.3	41.4	4.63	18.4	3.99	1.1	4.12	0.61	3.64	0.73	2.21	0.31	2.1	0.32
380-350Ma magmatic rocks
Mafic rocks
44	Boluokenu range	QE01	Gabbro diorite	54.41	1.02	15.84	n.a.	n.a.	6.9357	0.16	6.97	7.1	2.43	1.76	0.18	2.2	100.04	31.1	204	202	34.5	57.8	19	73	313	2.3	763	25.7	6.4	0.54	138	3.56	2.3	3.8	0.96	12	28.7	3.98	16.88	4.03	1.13	4.18	0.72	4.62	0.97	2.66	0.44	2.85	0.48
45	Boluokenu range	QE03	Gabbro diorite	51.58	1.03	16.02	n.a.	n.a.	7.1347	0.16	8.3	8.14	2.22	1.47	0.13	2.12	99.41	30.2	189	270	37.9	74.5	15.9	66	290	3.8	656	26.8	4.4	0.33	123	3.19	2.3	1.9	0.43	9.5	22.8	3.24	14.67	3.81	1.14	4.09	0.75	4.87	1.03	2.81	0.46	3.02	0.49
46	Boluokenu range	QE05	Gabbro diorite	55.06	0.99	16.66	n.a.	n.a.	6.8548	0.13	6.33	8.35	2.21	0.64	0.15	1.73	99.75	25.7	178	156	33.4	58.8	18.5	30	293	2.5	559	27.5	6	0.46	146	3.82	2.4	3.7	0.91	12.4	28.5	3.99	16.97	4.14	1.24	4.43	0.79	5.13	1.06	2.85	0.48	3.16	0.5
47	Boluokenu range	QE21	Gabbro diorite	53.28	0.97	15.51	n.a.	n.a.	6.7158	0.15	7.33	7.93	2.69	1.41	0.17	2.13	99.34	31.1	197	241	35.2	60.9	17.6	61	309	2.9	401	25.9	5.6	0.43	132	3.31	2.2	3.2	0.83	12.7	28.7	3.96	16.92	4.05	1.19	4.12	0.75	4.73	0.96	2.72	0.45	2.93	0.49
48	Boluokenu range	QE24	Gabbro diorite	54.04	0.97	18.8	n.a.	n.a.	4.956	0.09	5.08	6.75	3.52	1.7	0.15	2.15	99.43	24.7	164	85	23.5	59.4	19.3	77	522	6	758	25.5	5.2	0.42	131	3.45	3.2	3.2	0.81	11	24.5	3.46	14.75	3.53	1.01	3.88	0.71	4.49	0.94	2.62	0.43	2.87	0.46
49	Boluokenu range	QE26	Gabbro diorite	54.52	0.99	15.77	n.a.	n.a.	6.5311	0.15	7.04	6.75	2.51	1.29	0.17	2.29	99.32	30.2	194	215	32.9	56.7	18	63	287	3.8	351	26.8	6	0.45	138	3.44	2.9	3.7	0.93	13.2	29.4	4.1	17.23	4.11	1.22	4.22	0.76	4.81	1.01	2.77	0.46	3.08	0.49
50	Boluokenu range	KXX17	Gabbro diorite	52.26	1.06	18.11	n.a.	n.a.	8	0.12	4.62	9.6	3.02	0.97	0.15	2.08	99.99	27.9	281	n.a.	28.4	n.a.	n.a.	43.1	372	n.a.	206	26.6	4.86	0.348	194	5.08	5.39	2.89	1.06	12.5	27.4	3.42	15.4	3.74	1.16	3.78	0.751	4.5	0.984	2.9	0.487	2.95	0.46
51	Boluokenu range	KXX18	Gabbro diorite	52.58	1.11	18.13	n.a.	n.a.	8.06	0.12	4.59	9.6	2.97	0.77	0.15	1.92	100	27.5	290	n.a.	29.9	n.a.	n.a.	33.6	365	n.a.	175	24.6	4.48	0.345	159	4.23	5.22	2.66	1.07	11.3	25.1	3.28	14.4	3.23	1.17	3.41	0.679	4.62	0.861	2.76	0.464	2.65	0.408
52	Boluokenu range	KXX22	Gabbro diorite	52.73	0.85	17.69	n.a.	n.a.	7.79	0.1	5.04	8.69	3.01	1.24	0.13	2.74	100.01	28.3	234	n.a.	27.5	n.a.	n.a.	59	369	n.a.	258	22.3	3.87	0.321	155	4.35	4.43	2.76	0.718	10.2	22.1	2.83	12.5	2.78	1.05	3.04	0.598	4.13	0.778	2.6	0.34	2.62	0.361
53	Boluokenu range	KXX58	Gabbro diorite	54.26	0.989	17.05	n.a.	n.a.	8.31	0.126	5.42	9.2	3.09	0.986	0.162	0.28	99.873	31	226	n.a.	31.2	n.a.	n.a.	34.5	370	n.a.	192	23	5.81	0.392	187	3.83	7.22	2.72	0.75	12.8	27	3.5	15.4	3.57	1.07	3.27	0.689	4.15	0.793	2.34	0.402	2.57	0.396
54	Boluokenu range	KXX59	Gabbro diorite	52.94	1.04	18.26	n.a.	n.a.	8.1	0.113	4.39	9.96	3.06	0.789	0.14	1.08	99.872	29.6	275	n.a.	29	n.a.	n.a.	31.5	368	n.a.	180	20.9	5.18	0.356	172	3.67	6.17	2.64	0.793	11.5	24.3	3.14	13.8	3.23	1.04	2.99	0.637	3.84	0.735	2.13	0.371	2.41	0.37
55	Boluokenu range	KXX05	Gabbro diorite	52.31	1.07	15.07	n.a.	n.a.	7.86	0.12	9.8	7.63	2.36	1.77	0.15	1.85	99.99	29.6	204	n.a.	34.8	n.a.	n.a.	100	278	n.a.	550	31.4	4.35	0.359	241	6.59	1.36	3.06	1.1	11.1	25	3.52	15.9	3.97	1.45	4.12	0.946	5.45	1.14	3.55	0.511	3.55	0.518
56	Boluokenu range	KXX06	Gabbro diorite	51.77	1.11	15.34	n.a.	n.a.	8.41	0.14	8.86	7.54	2.61	1.87	0.17	2.17	99.99	29.6	216	n.a.	30.6	n.a.	n.a.	94	350	n.a.	1383	34.1	4.63	0.371	262	6.93	1.17	3.35	0.804	11.3	25.8	3.59	16.3	4.02	1.65	4.73	0.974	6.17	1.21	3.66	0.569	3.54	0.577
57	Boluokenu range	KXX07	Gabbro diorite	52.05	1.12	15.2	n.a.	n.a.	8.53	0.14	8.92	7.37	2.52	1.83	0.17	2.14	99.99	32.2	215	n.a.	31.5	n.a.	n.a.	97.6	362	n.a.	1370	36.4	4.77	0.382	274	6.33	1.29	3.42	1.2	12.7	28.4	3.88	16.7	4.33	1.59	4.81	0.99	6.13	1.24	4.06	0.619	3.79	0.634
58	Boluokenu range	KXX08	Gabbro diorite	51.28	1.07	14.73	n.a.	n.a.	8.16	0.11	10.12	6.4	2.67	2.1	0.17	3.2	100.01	31.9	211	n.a.	32.4	n.a.	n.a.	119	349	n.a.	748	30.4	4.31	0.338	251	6.18	2.42	3.05	1.27	10.4	23.9	3.39	15.1	3.6	1.29	4.2	0.835	5.72	1.1	3.44	0.538	3.47	0.538
59	Boluokenu range	KXX36	Gabbro diorite	50.98	1.14	15.4	n.a.	n.a.	9.07	0.13	8.91	6.64	3.12	1.45	0.17	2.97	99.98	30.3	211	n.a.	39.7	n.a.	n.a.	63.7	345	n.a.	844	33.5	4.8	0.403	257	6.76	1.65	3.44	0.905	12.6	29.4	3.84	17	4.04	1.47	4.51	1	5.88	1.23	3.9	0.594	3.62	0.579
60	Boluokenu range	KXX80	Gabbro diorite	54.19	1.17	18.58	n.a.	n.a.	8.11	0.119	4.14	6.25	3.27	1.97	0.169	1.88	99.848	27.5	205	n.a.	27	n.a.	n.a.	81.9	363	n.a.	1384	30.5	6.08	0.409	254	5.34	11.1	3.14	0.869	14.7	31.8	4.25	18.4	4.35	1.17	4.1	0.891	5.53	1.06	3.11	0.541	3.48	0.536
328	Boluokenu range	TWE-4	Basaltic andesite	51.75	0.8	15.77	n.a.	n.a.	7.41	0.11	7.4	9.11	2.34	0.76	0.11	4.33	99.89	33.7	209	n.a.	37.1	94.9	16.1	27.2	282	2.53	145	30.3	3.42	0.414	216	5.17	6.43	3.04	1.04	11.1	23.8	3.18	12.9	3.6	1.12	3.42	0.786	5.22	1.07	3.08	0.489	3.32	0.564
329	Boluokenu range	TWE-5	Basaltic andesite	52.42	0.75	15.58	n.a.	n.a.	7.77	0.1	7.66	8.6	2.24	0.67	0.11	3.97	99.87	33.4	197	n.a.	37.7	97.3	15.9	22.3	269	2.95	132	27.8	3.27	0.366	202	4.8	6.38	2.81	1.03	9.81	22.2	2.76	13.4	3.19	1.02	3.15	0.781	4.84	1.09	3.12	0.454	3.14	0.485
330	Boluokenu range	TWE-6	Basaltic andesite	51.54	0.83	15.26	n.a.	n.a.	7.3	0.11	6.91	9.41	2.4	0.79	0.12	5.2	99.87	33.4	186	n.a.	36	94.5	15.8	26.5	259	2.57	163	32.5	3.46	0.365	238	5.78	7.71	3.31	1.06	12	26.5	3.31	15.1	3.46	1.11	3.96	0.892	5.6	1.1	3.47	0.549	3.62	0.515
331	Boluokenu range	TWE-7	Basaltic andesite	51.87	0.79	15.46	n.a.	n.a.	7.75	0.11	7.74	8.93	2.32	0.71	0.11	4.19	99.98	34	208	n.a.	40.3	104	16.4	25.7	283	3.5	150	30.6	3.37	0.345	209	5.46	6.8	3.02	0.983	11	24.1	3.07	13.5	3.61	1.07	3.64	0.831	5.13	1.12	3.11	0.51	3.69	0.539
Intermediate-acid rocks
1	Boluokenu range	g3	Monzogranite	73.28	0.26	13.67	0.31	0.99	n.a.	0.11	0.54	0.56	3.98	4.62	0.08	0.32	98.72	3.37	0.83	2.63	0.22	1.38	15.3	209	24.8	4.24	232	26.1	25.3	2.32	108	4.58	18.3	26.2	3.71	45.9	88.9	9.87	34.9	6.07	0.34	5.76	0.91	5.12	0.98	2.87	0.46	2.85	0.46
2	Boluokenu range	g4	Monzogranite	67.59	0.52	15.28	1.65	1.5	n.a.	0.06	1.12	2.15	4.05	3.78	0.14	0.88	98.72	8.9	40.8	2.71	4.43	2.24	20.4	148	233	7.84	817	35.2	27	2.25	321	8.94	15.7	21.5	3.1	41.8	83.9	9.37	34.6	6.58	1.41	6.46	1.04	6.13	1.25	3.72	0.61	3.82	0.66
3	Boluokenu range	g5	Monzogranite	67.19	0.56	15.76	1.87	1.7	n.a.	0.08	1.21	2.54	4.06	3.74	0.16	0.69	99.56	8.2	41.1	5.67	4.98	3.93	18.6	133	375	7.15	1037	31.1	22.3	1.75	276	7.64	12.7	17.3	2.39	35.5	72.7	8.1	30.6	6.17	1.33	6.07	0.96	5.73	1.14	3.38	0.55	3.31	0.55
4	Boluokenu range	g6	Monzogranite	77.41	0.09	12.28	0.2	0.48	n.a.	0.02	0.11	0.41	3.2	5.12	0.01	0.46	99.79	3.07	1	4.35	0.24	2.44	13.8	223	23.6	4.02	222	22.7	25.5	2.33	118	4.98	14.3	26.4	3.94	36.5	73.5	7.82	26.9	4.62	0.29	4.45	0.69	4	0.82	2.42	0.37	2.32	0.38
5	Boluokenu range	g7	Monzogranite	77.86	0.1	12.37	0.13	0.49	n.a.	0.01	0.13	0.27	3.07	5.26	0.01	0.34	100.04	3.07	1.17	6.41	0.19	3.6	14.6	235	21.1	3.98	246	26	28.4	2.72	122	5.08	14.7	30	5	50.9	93.5	11	37.6	6.17	0.37	5.58	0.81	4.73	0.9	2.68	0.42	2.51	0.42
6	Boluokenu range	g8	Monzogranite	77.54	0.1	12.35	0.11	0.63	n.a.	0.01	0.14	0.3	3.13	5.12	0.01	0.37	99.81	3.66	1	1.28	0.22	0.62	14	224	26.1	3.97	277	19.2	26.3	2.55	115	4.83	13.3	25.9	7.95	11.5	23.7	2.7	9.94	2.3	0.28	2.59	0.55	3.54	0.75	2.34	0.37	2.44	0.41
7	Boluokenu range	g9	Monzogranite	71.68	0.23	14.91	0.47	0.88	n.a.	0.02	0.3	0.28	3.43	6.45	0.04	0.52	99.21	3.11	7.05	4.04	1.86	2.32	14.7	215	98.9	4.32	2145	19.5	17.3	1.49	252	7.49	18.8	18.3	7.8	35.9	63.3	7.38	25.9	4.91	1.13	4.12	0.6	3.4	0.68	2.01	0.33	2.05	0.34
8	Boluokenu range	wl-06	Quartz diorite	66.29	0.73	15.17	2.66	1.78	n.a.	0.08	1.59	3.35	3.85	3.18	0.15	0.66	99.49	10.8	74.3	9.19	10.3	9.38	18.6	126	262	7.31	379	30.5	10.6	1.01	295	8.27	17.9	17.8	3.07	28.4	62	7.45	29.3	5.83	1.2	6.03	0.96	5.4	1.1	3.18	0.51	3.17	0.51
9	Boluokenu range	wl-07	Quartz diorite	65.16	0.79	16	2.1	2.38	n.a.	0.09	1.75	3.06	4.73	2.62	0.18	1.32	100.18	13.3	88.3	9.21	9.9	6.33	19.8	99.7	346	6.24	353	28.9	7.41	0.65	296	7.97	20.2	11.1	2.27	22.9	50.5	6.51	27.1	5.56	1.51	5.82	0.91	5.13	1.05	3.09	0.48	2.94	0.47
10	Boluokenu range	wl-08	Quartz diorite	66.26	0.75	15.24	2.96	1.53	n.a.	0.08	1.64	3.62	3.84	3.32	0.15	0.51	99.9	11.2	79	17.5	10.8	12.4	19.1	161	243	9.91	402	31.2	11.1	1.02	340	9.75	17.6	17.8	2.98	28.1	60.8	7.43	30	6.04	1.25	6.16	0.97	5.51	1.12	3.32	0.52	3.19	0.54
11	Boluokenu range	wl-09	Quartz diorite	60.53	0.86	15.97	4.28	1.6	n.a.	0.1	3.16	5.69	3.56	1.99	0.15	1.21	99.1	16.8	131	40.8	19.2	23.2	19.5	89.4	312	3.77	420	26	8.3	0.7	557	14.8	14.1	10.1	1.37	20.9	45.3	5.61	22.7	4.79	1.34	5.18	0.82	4.7	0.97	2.88	0.45	2.83	0.47
12	Boluokenu range	wl-11	Quartz diorite	64.76	0.76	15.2	2.57	2.18	n.a.	0.09	1.74	3.4	4.24	2.98	0.16	1.04	99.12	12.7	84.6	11.7	11.1	9.39	19.1	122	302	4.39	392	33.1	10.8	0.97	309	8.77	19.1	16.4	2.83	29.7	63.4	7.98	31.5	6.4	1.33	6.65	1.04	5.89	1.2	3.52	0.54	3.34	0.56
13	Boluokenu range	9-2	Monzogranite	73.73	0.23	13.01	0.23	0.52	n.a.	0.02	0.16	1.6	1.96	5.79	0.04	2.2	99.49	2.23	10.7	6.64	0.67	4.1	17.7	226	55	4.77	291	28.4	33.6	3.88	180	6.02	12.1	33	3.87	41.9	79.8	8.88	30.2	5.17	0.53	5.03	0.79	4.68	0.93	2.75	0.45	2.77	0.47
14	Boluokenu range	9-3	Monzogranite	73.55	0.25	13.63	0.5	0.74	n.a.	0.06	0.52	0.68	3.95	4.54	0.07	0.74	99.23	2.21	14.3	10.8	1.52	6.08	16.8	153	181	5.59	614	17.3	29.1	2.75	189	5.47	19.5	19.7	3.26	36.2	65.2	6.55	21.1	3.4	0.59	2.93	0.48	2.78	0.57	1.76	0.3	2.08	0.37
15	Boluokenu range	9-4	Monzogranite	74.38	0.24	13.95	0.63	0.84	n.a.	0.03	0.4	0.63	4.02	4.58	0.07	0.71	100.48	1.86	12.2	2.01	1.56	1.39	16.1	161	162	3.64	659	17.3	31	3.12	176	5.44	16.5	22.5	3.35	41.2	73.5	7.49	23.8	3.84	0.62	3.14	0.51	3.02	0.63	2.02	0.35	2.39	0.41
16	Boluokenu range	9-5	Monzogranite	73.83	0.25	13.6	0.63	0.08	n.a.	0.08	0.36	1.09	3.88	4.92	0.07	1	99.79	1.84	12.1	7.92	1.44	5.09	16.4	158	106	2.89	672	18.5	32.7	3.26	187	5.63	44.7	23.5	3.16	38.8	69.7	6.94	22.7	3.52	0.52	2.98	0.48	2.88	0.6	1.93	0.32	2.16	0.39
17	Boluokenu range	9-6	Monzogranite	72.37	0.27	13.81	0.59	0.08	n.a.	0.1	0.49	1.54	3.64	5.05	0.08	1.69	99.71	2.12	13.3	9.57	1.47	5.36	15.8	162	77.3	3.86	581	16.4	28.7	2.78	199	5.7	28	22	2.98	47.7	85.3	8.6	27.5	3.91	0.53	3.27	0.47	2.72	0.55	1.72	0.3	1.99	0.36
18	Boluokenu range	9-7	Monzogranite	72.02	0.28	13.39	0.25	0.47	n.a.	0.15	0.49	2.01	3.59	4.84	0.08	2.12	99.69	2.41	13.1	1.82	1.16	1.97	15.1	151	90.4	3.26	859	17.8	31.9	3.01	210	6.06	78.3	21.5	5.34	27.4	53.3	5.09	16.5	3.01	0.45	2.82	0.47	2.76	0.58	1.84	0.31	2.11	0.37
19	Boluokenu range	9-8	Monzogranite	76.32	0.09	12.04	0.4	0.42	n.a.	0.02	0.13	0.36	3.41	5.02	0.02	0.77	99	2.13	11.2	1.01	1.76	1.16	15.6	145	154	3.4	577	15.3	27.4	2.56	159	4.6	32.9	19.9	2.89	33.5	58.8	6.15	20.2	3.21	0.56	2.79	0.43	2.6	0.52	1.59	0.28	1.92	0.33
20	Biezhentao range	WQ2	Biotite monzodiorite	64.56	0.89	14.09	n.a.	n.a.	7.21	0.11	1.14	3.08	2.33	4.02	0.28	1.83	99.54	18.2	n.a.	n.a.	n.a.	n.a.	n.a.	178	163	4.76	503	53.5	13.7	1.17	533	13.2	17.5	17.6	3.88	40.2	87.7	11.3	44.8	10.5	1.91	10.3	1.74	10.5	2.17	5.89	0.89	5.76	0.91
21	Biezhentao range	WQ4	Biotite monzodiorite	70.06	0.59	14.06	n.a.	n.a.	3.99	0.06	0.71	2.38	3.3	4.05	0.12	0.62	99.94	10.2	n.a.	n.a.	n.a.	n.a.	n.a.	189	149	6.48	629	42.3	11.2	1.11	350	9.87	21	16.2	3.57	33.8	71.1	8.97	34.5	7.84	1.26	7.74	1.33	7.84	1.67	4.56	0.7	7.55	0.7
22	Biezhentao range	WQ5	Diorite	52.1	2.46	14.96	n.a.	n.a.	10.92	0.19	4.95	6.81	4.65	1.56	0.24	1.47	100.31	29.4	n.a.	n.a.	n.a.	n.a.	n.a.	71.3	434	6.11	348	37.5	8.28	0.76	186	5.21	10.6	5.22	1.56	16.1	36.4	5.11	22.3	6.08	1.82	6.61	1.16	7.21	1.55	4.1	0.64	4.06	0.63
23	Biezhentao range	WQ6	Biotite monzodiorite	59.96	1.42	14.43	n.a.	n.a.	10.59	0.16	2.02	3.92	1.83	2.9	0.49	1.65	99.37	24.9	n.a.	n.a.	n.a.	n.a.	n.a.	159	307	16.4	468	50.9	14.1	1.27	569	14.8	17.2	14.1	4.22	35.6	79.2	10.5	43.2	10.4	2.36	10.2	1.72	10.3	2.2	6.02	0.87	5.58	0.91
24	Biezhentao range	C14BL50	Monzogranites	74.1	0.17	13.05	n.a.	n.a.	1.82	0.03	0.36	1.32	3.75	3.81	0.04	0.63	99.1	4.56	11	9.38	1.81	2.95	18.4	80.7	114	1.15	142	41.8	14.58	1.2	181	5.33	18.9	15.4	1.69	17.9	34.6	4.62	18.4	4.36	0.38	4.75	1.08	7.12	1.58	4.72	0.743	4.83	0.7
25	Biezhentao range	C14BL51	Monzogranites	74.1	0.16	13.3	n.a.	n.a.	1.41	0.02	0.29	0.81	3.47	4.78	0.03	0.61	99	4.5	10.2	6.04	1.45	1.69	16.9	118	82.9	2.12	216	23	11.52	1.01	166	4.88	18.6	23.5	4.76	18.1	34.3	4.65	18.6	4.13	0.42	3.83	0.708	4.34	0.893	2.55	0.401	2.62	0.357
26	Biezhentao range	C14BL52	Monzogranites	74.1	0.15	13.4	n.a.	n.a.	1.62	0.03	0.28	0.98	3.53	4.82	0.03	0.57	99.5	5.06	10.1	9.21	1.48	2.12	17.8	123	85.7	2.17	174	38.3	12.24	0.92	146	4.43	18.1	17.7	2.25	17.1	31.9	4.35	17.3	4.54	0.41	5.2	1.08	7.35	1.63	4.74	0.722	4.58	0.655
27	Biezhentao range	C14BL53	Monzogranites	74.1	0.19	13.15	n.a.	n.a.	1.87	0.03	0.47	1.03	3.6	3.96	0.05	0.8	99.3	6.82	11.7	6.44	2.25	2.84	20.9	135	120	2.2	287	63.7	17.1	1.49	184	5.65	22.8	29.9	2.93	30.4	68	7.35	29.7	6.8	0.59	7.55	1.6	10.3	2.28	6.83	1.08	6.97	1.01
28	Biezhentao range	06XJ-017	Granodiorite	66.85	0.31	16.59	2.45	n.a.	n.a.	0.02	1.28	2.57	3.5	4.05	0.03	1.56	99.48	0.721	25.59	11.87	4.409	9.217	13.74	92.34	308.3	4.561	234.9	10.57	4.761	0.456	67.37	1.982	2.907	3.129	1.095	9.948	22.24	2.831	10.6	2.082	0.435	1.935	0.326	1.914	0.388	1.122	0.175	1.207	0.184
29	Biezhentao range	06XJ-16	Granodiorite	67.86	0.3	16.67	1.22	n.a.	n.a.	0.01	0.88	0.47	2.49	7.53	0.06	1.96	99.6	4.132	19.75	20.34	1.355	5.443	15.24	219.8	444.7	13.94	509.4	13.72	6.258	0.606	123	3.226	5.96	8.087	1.091	17.79	37.7	4.58	16.37	3.061	0.517	2.355	0.403	2.267	0.49	1.386	0.205	1.417	0.225
31	Biezhentao range	06XJ-19-1	Diorite	58.3	1.21	16.25	5.91	n.a.	n.a.	0.06	3.38	2.72	3.32	3.35	0.27	4.43	99.84	10.49	99.07	23.33	13.94	20.2	18.8	110.6	257.8	4.255	328	24.44	12.36	0.813	227.7	5.638	10.96	10.4	2.112	33.81	73.95	8.945	33.24	6.005	0.933	5.171	0.803	4.572	0.87	2.423	0.346	2.159	0.329
32	Biezhentao range	06XJ-19-2	Diorite	55.89	1.4	16.88	6.5	n.a.	n.a.	0.07	3.73	3.02	2.61	3.61	0.31	5.45	100.19	13.27	130	32.16	16.57	21.62	19.21	135.7	131.9	5.758	296.9	23.16	13.32	0.866	242.8	5.767	6.741	9.632	1.782	33.92	72.14	8.954	33.48	6.054	0.959	5.031	0.803	4.24	0.84	2.238	0.323	2.074	0.318
33	Biezhentao range	06XJ-20	Plagioclase granite	69.46	0.25	16.04	0.84	n.a.	n.a.	0.02	0.75	2	4.79	4.54	0.05	1.19	100.03	2.744	25.32	11.36	0.68	6.908	13.63	102.5	382.7	3.495	432.5	16.8	8.11	0.784	108.9	2.992	3.796	7.615	1.789	10.24	26.76	3.716	14.69	3.013	0.502	2.624	0.446	2.631	0.55	1.572	0.234	1.604	0.255
34	Biezhentao range	06XJ-21-1	Plagioclase granite	68.33	0.3	17.06	1.9	n.a.	n.a.	0.01	1.37	0.84	4.24	3.56	0.05	2.16	100.04	2.613	26	10.95	3.224	9.691	17.5	108.7	358.6	6.327	336.9	12.76	6.427	0.554	92.96	2.591	8.562	6.875	0.954	14.72	31.03	3.919	14.62	2.747	0.435	2.253	0.366	2.057	0.431	1.224	0.191	1.263	0.196
35	Biezhentao range	06XJ-22	Granodiorite	59.7	0.38	19.75	2.56	n.a.	n.a.	0.02	1.69	1.77	6.52	3.62	0.1	2.94	99.34	3.685	42.88	6.737	3.604	7.313	16.71	127.5	401.2	7.819	346.5	13.94	5.414	0.488	129.9	3.556	7.013	6.316	1.216	18.05	38.11	4.845	17.64	3.071	0.611	2.585	0.401	2.293	0.499	1.398	0.227	1.478	0.239
36	Biezhentao range	06XJ-23-1	Plagioclase granite	68.23	0.34	16.47	2.8	n.a.	n.a.	0.05	1.16	2.63	4.06	2.14	0.04	1.85	100.09	2.586	38.03	7.647	5.495	7.055	16.57	67.34	436	2.276	352.9	15.26	6.201	0.591	107.6	3.164	5.795	7.094	1	18.99	38.11	4.608	17.1	3.12	0.656	2.65	0.47	2.548	0.521	1.471	0.227	1.533	0.237
37	Biezhentao range	06XJ-23-2	Plagioclase granite	67.25	0.34	16.46	3.05	n.a.	n.a.	0.05	1.23	2.84	4.33	1.78	0.04	1.74	99.44	2.813	30.95	28.96	4.918	8.429	16.15	56.33	371.5	4.145	256.9	14.51	6.295	0.573	102.4	3.094	6.044	6.88	1.28	17.76	36.82	4.426	16.29	2.938	0.689	2.663	0.415	2.55	0.506	1.453	0.236	1.555	0.248
38	Boluokenu range	T10	Granitic porphyry	75.36	0.24	12.78	n.a.	n.a.	1.21	0.007	0.19	0.28	4.19	4.46	0.02	1.12	99.857	2.36	18.7	n.a.	1.69	3.74	11.4	155	177	2.58	715	11.2	16.5	1.46	174	4.56	11.5	8.99	2.43	28.6	49.2	4.96	16.6	2.42	0.665	1.91	0.365	1.86	0.358	1.17	0.196	1.39	0.233
39	Boluokenu range	T11	Granitic porphyry	75.27	0.24	13.05	n.a.	n.a.	1.07	0.009	0.11	0.21	3.41	5.55	0.04	0.91	99.869	2.17	21.9	n.a.	1.99	2.81	11.9	184	186	2.88	827	12.1	17.1	1.56	187	4.95	12.4	9.35	3.34	30.4	51.9	5.14	17.9	3	0.626	2.12	0.365	2.23	0.388	1.3	0.23	1.55	0.225
40	Boluokenu range	T12	Granitic porphyry	77.11	0.22	12.35	n.a.	n.a.	0.66	0.015	0.11	0.18	2.86	5.58	0.03	0.74	99.855	2.16	20.8	n.a.	0.911	2.61	9.82	166	136	2.19	806	10.5	16.8	1.41	159	4.27	7.98	8.43	2.42	27.4	45.5	4.54	15.2	2.21	0.572	1.87	0.291	1.73	0.324	1.16	0.222	1.39	0.223
41	Boluokenu range	T13	Granitic porphyry	75.85	0.22	12.94	n.a.	n.a.	0.83	0.008	0.11	0.2	3.03	5.72	0.04	0.92	99.868	1.92	20.3	n.a.	1.96	3.67	9.66	165	131	2.08	701	9.77	15.3	1.38	144	3.91	11.1	8.05	2.51	25	44.9	4.19	14.1	2.05	0.549	1.44	0.262	1.47	0.345	1.03	0.187	1.19	0.238
42	Boluokenu range	T14	Granitic porphyry	77.15	0.22	12.24	n.a.	n.a.	0.41	0.007	0.09	0.12	1.39	7.66	0.03	0.53	99.847	2.25	29.9	n.a.	1.03	1.93	9.91	252	139	3.09	898	10.4	16.7	1.4	153	4.06	8.6	8.97	2.65	28.5	48.3	4.74	16	2.49	0.574	1.87	0.368	1.81	0.34	1.11	0.207	1.37	0.25
43	Boluokenu range	T15	Granitic porphyry	73.5	0.25	14.36	n.a.	n.a.	0.79	0.008	0.37	0.51	2.74	5.73	0.03	1.59	99.878	2.91	49.2	n.a.	1.34	2.57	15.8	197	159	4.63	839	12.8	17.7	1.59	168	4.74	7.45	9.3	2.86	30.3	50.1	5.03	16.8	2.57	0.62	1.9	0.334	2.07	0.42	1.39	0.247	1.77	0.268
61	Boluokenu range	KXX02	Granodiorite	65.77	0.47	15.9	n.a.	n.a.	3.97	0.071	2.17	4.12	3.72	2.42	0.12	1.18	99.911	9.58	79.4	n.a.	12	n.a.	n.a.	87.1	391	n.a.	544	22.2	7.56	0.693	108	3.75	9.98	10.1	1.36	22	42.7	4.85	18.7	3.68	1.05	3.12	0.646	3.91	0.721	2.34	0.352	2.52	0.409
62	Boluokenu range	KXX34	Granodiorite	65.9	0.48	15.47	n.a.	n.a.	3.94	0.071	2.3	2.9	4.17	2.58	0.12	2.06	99.991	9.84	65.5	n.a.	12.3	n.a.	n.a.	113	263	n.a.	470	20.8	7.4	0.767	65	2.47	9.19	9.01	1.41	21.4	40.5	4.53	17.4	3.03	0.914	3.22	0.624	3.78	0.724	2.21	0.357	2.29	0.37
63	Boluokenu range	KXX35	Granodiorite	65.78	0.48	15.78	n.a.	n.a.	3.9	0.072	2.21	3.88	3.66	2.44	0.12	1.67	99.992	9.38	67.4	n.a.	11.3	n.a.	n.a.	84.6	372	n.a.	493	21.4	7.6	0.747	86.9	3.26	13.4	9.16	1.42	20.1	39.3	4.47	17	2.98	0.942	3.05	0.643	4.15	0.738	2.36	0.368	2.51	0.453
64	Boluokenu range	KXX37	Granodiorite	64.66	0.49	15.86	n.a.	n.a.	4.09	0.078	2.37	4.22	4.05	2.06	0.11	2	99.988	10.5	71.1	n.a.	12.7	n.a.	n.a.	78.5	336	n.a.	465	22.4	8.03	0.692	60.2	2.45	11.4	8.02	1.25	20.4	40.1	4.79	17.9	3.75	0.991	3.75	0.703	3.76	0.775	2.32	0.396	2.56	0.312
65	Boluokenu range	QE07	Granodiorite	66.56	0.48	16.18	n.a.	n.a.	2.5313	0.06	2.24	4.04	2.96	2.32	0.11	1.69	100.18	9.6	64	52	12.2	27.4	19.5	81	373	2	483	17.1	8.3	0.73	142	6.09	9.8	7.6	0.82	19.7	38.7	4.69	17	3.39	0.94	3.17	0.51	3.03	0.6	1.65	0.28	1.93	0.3
66	Boluokenu range	QE08	Granodiorite	66.1	0.48	15.96	n.a.	n.a.	2.7508	0.07	2.31	4.15	2.97	2.32	0.11	1.29	99.43	9.5	64	51	11.8	24.3	18.7	83	337	3.3	407	18.5	8.4	0.78	148	6.23	11.9	7.2	2.21	20.5	39.2	4.65	17.51	3.4	0.91	3.15	0.51	3.06	0.62	1.69	0.29	1.89	0.3
67	Boluokenu range	QE09	Granodiorite	65.4	0.48	16.3	n.a.	n.a.	2.4771	0.06	2.23	4.1	3.16	2.37	0.11	1.63	99.39	9.2	65	47	11.7	23.9	19.3	86	375	2.2	491	17.7	8.2	0.76	149	6.34	10.1	7.3	0.83	20.5	39.2	4.65	17.51	3.4	0.91	3.15	0.51	3.06	0.62	1.69	0.29	1.89	0.3
68	Boluokenu range	QE10	Granodiorite	66.17	0.47	16.15	n.a.	n.a.	2.596	0.05	2.16	3.68	2.91	2.61	0.11	1.57	99.35	9.7	62	41	11.7	22.7	19.8	100	356	3.3	616	18.6	8.3	0.76	145	5.68	10.5	8.2	1.13	18.8	39.6	4.59	17.32	3.42	0.91	3.26	0.54	3.22	0.64	1.82	0.3	2.06	0.32
69	Boluokenu range	QE11	Granodiorite	66.74	0.5	16.21	n.a.	n.a.	2.674	0.06	2.13	3.11	2.98	2.25	0.13	1.66	99.39	9.1	65	44	11.4	22.1	18.9	89	317	3.3	401	17.9	8.5	0.88	148	6.03	10.9	8	1.18	21.1	40.7	4.74	17.19	3.37	0.86	3.24	0.52	3.08	0.63	1.71	0.3	1.98	0.33
70	Boluokenu range	QE12	Granodiorite	66.06	0.49	16.32	n.a.	n.a.	2.6086	0.06	2.21	3.91	2.93	2.22	0.12	1.9	99.83	9.2	66	43	11.6	22	19.1	81	371	2.4	497	17.3	8.2	0.71	151	5.83	8.9	7.6	0.92	21.8	40.8	4.88	17.64	3.41	0.93	3.17	0.52	3.04	0.61	1.64	0.27	1.85	0.29
71	Boluokenu range	QE13	Granodiorite	65.68	0.51	16.14	n.a.	n.a.	2.8496	0.06	2.29	3.92	2.97	2.3	0.12	1.84	99.58	9.7	69	43	12.3	23	19.1	84	351	3.2	459	17.6	8.6	0.71	152	5.53	9.1	7.6	1.1	18.9	38.1	4.55	16.98	3.34	0.89	3.14	0.52	3	0.61	1.71	0.28	1.85	0.3
72	Boluokenu range	QE14	Granodiorite	64.95	0.52	16.56	n.a.	n.a.	2.8826	0.06	2.28	4.43	2.95	2.17	0.12	1.58	99.41	9.8	67	42	12.4	22	19.2	80	353	2.7	456	18.8	8.5	0.68	159	5.67	9.1	7	0.97	19	37.4	4.63	17.28	3.53	0.93	3.33	0.55	3.22	0.65	1.8	0.3	1.99	0.33
73	Boluokenu range	QE15	Granodiorite	67.56	0.44	15.93	n.a.	n.a.	2.3101	0.06	1.83	2.87	2.92	2.7	0.11	1.77	99.38	7.9	55	38	10.2	18.4	18.3	99	336	4.9	535	17.1	8.2	0.71	144	4.92	10.3	8.2	1.14	20.2	40.2	4.75	17.25	3.39	0.88	3.05	0.52	2.93	0.58	1.64	0.28	1.84	0.29
74	Boluokenu range	QE16	Granodiorite	67.87	0.43	15.88	n.a.	n.a.	2.745	0.06	1.79	3.21	2.77	2.57	0.11	1.59	99.36	7.7	54	40	10	18.4	18.4	92	315	2.9	570	16.4	8.5	0.84	148	4.99	11.2	9	1.19	19.1	38.2	4.4	16.03	3.09	0.86	2.87	0.47	2.84	0.58	1.6	0.28	1.84	0.3
75	Boluokenu range	QE17	Granodiorite	67	0.44	15.65	n.a.	n.a.	2.3219	0.05	1.87	3.39	3.2	2.46	0.11	1.97	99.45	8.3	56	36	10.5	19.1	18.6	95	319	2.9	503	17.4	8.3	0.72	152	4.35	10.7	8.8	1.32	22.1	42.4	4.89	17.98	3.4	0.84	3.1	0.5	2.95	0.61	1.7	0.28	1.94	0.32
76	Boluokenu range	KXX12	Quartz diorite	65.63	0.44	15.62	n.a.	n.a.	3.84	0.032	1.89	3.07	4.2	2.93	0.11	2.21	99.972	8.72	67.2	n.a.	15.8	n.a.	n.a.	151	345	n.a.	570	20.2	7.52	0.716	124	4.02	8.63	9.43	1.82	19.4	37.2	4.2	16.3	3.05	0.95	2.85	0.562	3.38	0.659	1.95	0.342	2.16	0.32
77	Boluokenu range	KXX29	Quartz diorite	66.17	0.43	15.55	n.a.	n.a.	3.65	0.031	1.89	2.82	4.19	2.98	0.1	2.19	100.001	9.21	74.4	n.a.	14.9	n.a.	n.a.	162	377	n.a.	585	21.3	8.05	0.769	152	5.05	9.87	10.3	2.01	19.1	37	4.21	16.3	3.39	0.968	3.08	0.608	3.65	0.698	2.12	0.374	2.75	0.384
78	Boluokenu range	KXX30	Quartz diorite	64.63	0.46	15.58	n.a.	n.a.	4	0.038	2	3.34	4.41	2.77	0.12	2.61	99.958	8.76	70.5	n.a.	12.7	n.a.	n.a.	134	250	n.a.	520	21.7	7.56	0.73	130	4.31	8.2	8.87	2.3	21.9	42	4.86	18.9	3.57	0.958	3.19	0.564	3.74	0.733	2.03	0.348	2.31	0.377
79	Boluokenu range	KXX31	Quartz diorite	65.65	0.44	15.37	n.a.	n.a.	3.82	0.034	1.92	2.88	4.03	3	0.11	2.76	100.014	7.71	64.3	n.a.	13.2	n.a.	n.a.	143	334	n.a.	517	18	7.31	0.67	131	3.94	7.89	8.5	1.63	19.2	37	4.07	15.8	3.42	0.835	2.94	0.572	3.16	0.612	2.01	0.326	2.06	0.319
80	Boluokenu range	KXX32	Quartz diorite	65.59	0.42	15.66	n.a.	n.a.	3.67	0.033	1.88	3	4.27	2.91	0.11	2.46	100.003	6.88	62.2	n.a.	13.1	n.a.	n.a.	135	340	n.a.	487	16.2	7	0.614	132	3.79	6.91	8.16	1.52	15.9	32.7	3.45	13.7	2.48	0.778	2.33	0.48	2.97	0.595	1.69	0.261	1.92	0.271
81	Boluokenu range	16A‐72	Quartz diorite porphyry	64.22	0.76	15.56	n.a.	n.a.	5.52	0.08	2.61	4.71	3.46	2.94	0.14	1.52	100	14.7	104	34.9	30.3	17.6	18.5	127	274	4.94	318	30.7	8.88	0.83	328	8.39	14.8	17.4	2.8	24.3	55	6.47	25.7	5.55	1.12	5.31	0.84	5.14	1.05	3.08	0.46	3	0.45
82	Boluokenu range	16A‐74	Quartz diorite porphyry	65.83	0.73	15.52	n.a.	n.a.	5.04	0.08	1.66	3.63	4.03	3.32	0.16	1.15	100	11.4	74.2	10.7	33.4	8.08	18.9	139	263	7.04	391	33.1	11	1.08	326	8.47	20.1	17.8	3	28.1	62.3	7.25	28.7	6.07	1.22	5.8	0.91	5.59	1.14	3.37	0.51	3.34	0.5
83	Boluokenu range	16A‐76	Quartz diorite porphyry	64.01	0.76	15.89	n.a.	n.a.	5.65	0.09	2.59	4.37	3.85	2.63	0.15	1.4	99.99	14.3	101	31	30.8	16.5	19	96.1	312	4.5	351	31.5	9.23	0.89	308	8.05	17.7	16.2	2.21	25.6	56.4	6.65	26.5	5.66	1.14	5.47	0.87	5.3	1.08	3.19	0.47	3.12	0.47
84	Boluokenu range	16A‐83	Quartz diorite porphyry	64.1	0.81	15.98	n.a.	n.a.	5.81	0.09	2.07	4.11	4.01	2.84	0.17	1.1	99.99	13.2	93.6	15.2	38	10.8	19.8	108	295	5.68	375	33.3	11.1	1.07	290	7.39	17.2	15.3	2.09	26.9	60.3	7.02	28.3	6.09	1.28	5.91	0.92	5.69	1.15	3.38	0.5	3.27	0.49
85	Boluokenu range	16A‐84	Quartz diorite porphyry	62.53	0.72	16.09	n.a.	n.a.	5.71	0.08	2.64	4.7	4.54	2.84	0.14	2.26	99.99	14.6	113	36.7	28.2	18	18.2	122	181	2.73	255	29.1	8.25	0.79	272	7.02	14.2	13.4	2.82	24.9	52.3	6.05	24.3	5.16	1.17	5.06	0.79	4.91	0.99	2.93	0.44	2.88	0.43
86	Boluokenu range	16A‐78	Pyroxene diorite porphyry	56.31	0.8	16.76	n.a.	n.a.	7.88	0.12	5.21	7.18	4.28	1.31	0.15	1.98	100	26.6	163	96.5	35.7	34.1	18.3	45	475	3.88	133	19.7	3.01	0.29	118	3.15	7.02	3.72	0.91	10.8	27.3	3.52	15.6	3.74	1.08	3.67	0.57	3.47	0.7	2.01	0.29	1.89	0.28
87	Boluokenu range	16A‐79	Pyroxene diorite porphyry	58.71	1.1	16.69	n.a.	n.a.	7.64	0.1	3.76	5.31	3.53	2.95	0.21	2.17	100	22	175	52	29.5	24.7	17.8	114	333	6.51	394	31.2	7.28	0.66	244	6.27	10	10.1	3.14	22	50.7	6.23	26.1	5.89	1.3	5.77	0.91	5.48	1.1	3.17	0.46	2.98	0.44
88	Boluokenu range	16A‐80	Pyroxene diorite porphyry	61.07	0.92	15.75	n.a.	n.a.	6.96	0.1	3.4	5.51	3.4	2.69	0.18	1.27	99.98	19.8	158	51.4	28.2	22.1	17.7	105	341	5.35	306	30.1	7.21	0.65	222	5.75	14.6	9.26	2.97	21.6	48.3	5.86	24.3	5.43	1.15	5.34	0.85	5.17	1.04	3.04	0.45	2.9	0.43
99	Boluokenu range	12KKQ-1	K-granite	72.23	0.26	13.3	n.a.	n.a.	1.33	0.04	0.47	0.93	3.53	4.87	0.07	0.06	98.1	n.a.	15.31	2.01	223.9	15.28	17.07	189.05	164.08	n.a.	635.7	21.06	32.37	3.28	82.21	5.86	24.61	25.37	3.36	30.99	67.82	7.41	27.01	4.59	0.81	4.72	0.62	3.82	0.73	2.3	0.36	2.59	0.39
100	Boluokenu range	12KKQ-3	K-granite	70.49	0.25	13.87	n.a.	n.a.	0.56	0.05	0.46	1.95	3.93	4.5	0.08	0.11	96.26	n.a.	15.25	1.96	216.7	15.26	17.14	154.95	198.88	n.a.	523.6	21.09	34.48	3.22	68.01	5.57	22.1	29.39	7.07	37.48	78.03	7.89	28.36	4.8	0.81	5	0.64	3.91	0.75	2.31	0.35	2.54	0.38
101	Boluokenu range	PD03-1	K-granite	65.65	0.57	14.52	n.a.	n.a.	1.61	0.08	1.11	3.85	3.43	5.16	0.14	0.14	96.27	n.a.	43.75	2.65	103.4	8.33	18.67	195.25	260.78	n.a.	691.5	34.15	26.89	2.76	65.49	4.34	16.1	19.11	4.62	19.95	53.96	6.9	29.66	6.47	1.29	6.62	1.02	6.53	1.27	3.82	0.56	3.87	0.55
102	Boluokenu range	ZK126-1-01-1	K-granite	68.9	0.48	14.37	n.a.	n.a.	2.35	0.07	0.91	2.01	2.93	5.22	0.12	0.08	97.44	n.a.	16.01	1.58	158.3	11.23	15.48	142.35	108.68	n.a.	605.9	19.2	39.22	3.48	80.8	5.55	22.3	29.14	10.39	27.17	62.58	6.85	25.35	4.33	0.78	4.31	0.58	3.59	0.69	2.25	0.35	2.61	0.41
103	Boluokenu range	ZK126-1-01-6	K-granite	67.25	0.49	14.15	n.a.	n.a.	3.24	0.09	1.17	2.32	4.55	4.73	0.14	0.12	98.23	n.a.	35.19	6.2	96.61	7.6	19.12	201.45	151.28	n.a.	653.8	35.86	36.27	2.72	140.47	6.04	17.75	36.81	10.94	38.16	84.82	9.29	36.61	7.7	1.21	8.12	1.21	7.6	1.43	4.09	0.57	3.72	0.52
104	Boluokenu range	ZK126-1-01-7	K-granite	71.69	0.27	13.57	n.a.	n.a.	1.13	0.06	0.64	1.57	4.63	4.13	0.11	0.14	97.94	n.a.	39.38	4.67	134	10.53	20.46	184.35	173.58	n.a.	584.9	35.58	35.83	2.97	142.27	6.76	22.34	31.93	5.46	30.76	69.32	7.74	30.84	6.6	1.19	7.03	1.09	7.07	1.36	4.02	0.57	3.74	0.53
105	Boluokenu range	1501-2	Diorite	60.54	0.91	16.33	n.a.	n.a.	6.37	0.11	2.14	5.08	3.62	2.7	0.25	0.05	98.11	n.a.	94.14	4.52	115.7	9.72	22.49	88.86	342.18	n.a.	660.5	28.52	22.82	1.95	35.4	3.29	14.85	13.34	4.99	30.44	68.27	7.65	31.48	6.48	1.98	6.84	0.98	5.88	1.14	3.31	0.47	3.12	0.46
106	Boluokenu range	1501-3	Diorite	61.22	0.89	17.22	n.a.	n.a.	6.3	0.12	2.1	4.96	3.55	2.79	0.23	0.03	99.42	n.a.	89.34	4.51	92.07	8.25	21.45	82.94	336.18	n.a.	737.5	28.1	22.39	1.86	32.49	2.78	12.49	11.51	4.74	27.2	62.51	7.34	31.06	6.51	2.01	6.77	0.97	5.96	1.12	3.28	0.46	3.11	0.45
107	Boluokenu range	1501-4	Diorite	61.26	0.88	16.07	n.a.	n.a.	6.03	0.13	2.05	4.51	3.53	3.07	0.24	0.07	97.85	n.a.	88.13	4.23	121.2	9.57	21.5	92.54	341.08	n.a.	813.5	28.74	23.64	2.02	37.53	3.54	25.15	14.06	3.8	44.21	96.98	9.38	36.25	6.86	1.97	7.5	1.01	6.17	1.16	3.37	0.47	3.13	0.47
108	Boluokenu range	1501-5	Diorite	57.98	0.89	15.59	n.a.	n.a.	6.23	0.12	2.11	4.82	3.32	2.68	0.25	0.07	94.06	n.a.	87.4	4.14	120.3	9.36	21.39	92.57	341.18	n.a.	812	28.76	23.76	2	38.03	3.49	25.04	14.04	3.8	45.75	97.9	9.37	36.33	6.82	1.92	7.37	0.99	6.08	1.13	3.35	0.47	3.12	0.47
109	Boluokenu range	1501-6	Diorite	59.1	0.91	16.4	n.a.	n.a.	6.44	0.13	2.18	4.65	3.52	2.97	0.25	0.04	96.6	n.a.	92.41	4.29	118.4	9.05	21.71	89.45	327.38	n.a.	750.7	28.62	24.26	2.01	33.79	3.33	16.25	12.78	3.74	38.37	79.31	8.42	33.89	6.62	2	7.08	0.97	6.12	1.13	3.33	0.47	3.14	0.46
110	Boluokenu range	NLKC14-1	Granodiorite	74.32	0.17	12.85	0.190308	1.07841	1.41	0.03	0.2	1.13	3.99	4.35	0.05	1.4	n.a.	3	<8	n.a.	1.1	<20	13.4	123.5	63.5	1.4	379	22.1	27	2.2	138	4.2	8.9	19.8	3.1	42.5	75	7.4	24.4	4.09	0.36	3.56	0.64	3.67	0.74	2.2	0.36	2.41	0.38
111	Boluokenu range	NLKC14-2	Granodiorite	73.57	0.17	12.82	0.207854	1.17784	1.54	0.03	0.26	1.39	3.81	4.32	0.05	1.9	n.a.	4	<8	n.a.	1.1	<20	13.4	123.9	66.4	1.4	411	23.7	27.7	2.3	148.8	4.4	5.7	17.6	3.6	42.2	78.9	7.63	25.8	4.32	0.4	3.88	0.65	3.77	0.76	2.35	0.36	2.55	0.35
112	Boluokenu range	NLKC14-3	Granodiorite	75.93	0.11	12.35	0.129571	0.734237	0.96	0.03	0.16	0.67	3.78	4.73	0.03	1.1	n.a.	2	11	n.a.	0.9	<20	11.9	136.5	55.4	1.9	350	17.3	18.6	1.9	100.6	3.3	6.8	14.5	2.6	32.5	57.7	6.03	19.3	3.22	0.38	2.97	0.48	2.73	0.58	1.64	0.28	1.91	0.3
113	Boluokenu range	NLKC14-4	Granodiorite	72.88	0.18	12.96	0.217302	1.23138	1.61	0.05	0.27	1.8	4.06	4.19	0.05	1.8	n.a.	3	8	n.a.	1.5	<20	13.4	133.9	94.4	2.3	416	26.3	27.6	1.9	150.7	4.2	10.2	22	5	43.4	77.2	7.75	24.2	4.42	0.44	3.95	0.66	3.89	0.87	2.42	0.4	2.59	0.4
114	Boluokenu range	NLKC14-5	Granodiorite	73.89	0.24	13.68	0.273989	1.5526	2.03	0.02	0.43	0.53	2.81	4.62	0.07	1.5	n.a.	5	15	n.a.	2.1	<20	18.7	179	44.4	4.1	458	28.6	34.3	2.3	223.7	6.3	3.6	27.1	4	62	112.6	10.84	35.4	5.76	0.6	5.26	0.81	4.92	1.01	2.74	0.47	3.33	0.51
115	Boluokenu range	NLKC14-6	Granodiorite	73.71	0.18	12.08	0.183559	1.04017	1.36	0.04	0.29	2.31	3.91	3.78	0.06	2.1	n.a.	3	11	n.a.	1.4	<20	11.9	107.7	82.2	1.6	431	20.1	24.6	2.2	149.5	4.3	7.6	18.2	2.6	40.7	69.7	7.1	23.6	4.31	0.53	3.76	0.59	3.32	0.67	1.9	0.31	1.96	0.33
116	Boluokenu range	NLKC14-7	Granodiorite	73.2	0.15	12.27	0.129571	0.734237	0.96	0.05	0.13	2.53	3.28	4.44	0.04	2.8	n.a.	3	8	n.a.	1	<20	12.5	131	64	1.7	478	19.2	17.2	1.5	123.2	3.6	2.6	14	2.7	42.6	77.6	7.62	23.6	3.92	0.49	3.53	0.53	3.07	0.63	1.9	0.3	2.08	0.32
117	Boluokenu range	NLKC14-8	Granodiorite	76.82	0.09	12.58	0.125522	0.711292	0.93	0.02	0.13	0.37	3.88	4.45	0.02	0.6	n.a.	2	<8	n.a.	0.6	<20	11.7	125.8	68	1.8	420	17.2	21.7	1.7	90.7	2.8	3.8	19.1	1.8	27.6	57.2	5.3	17.1	3	0.27	2.95	0.48	2.93	0.51	1.73	0.3	2.04	0.33
118	Boluokenu range	NLKC14-9	Granodiorite	74.07	0.16	13.41	0.183559	1.04017	1.36	0.04	0.31	0.6	3.92	4.87	0.05	1.1	n.a.	3	<8	n.a.	1.1	<20	13.1	151.6	94.1	2.3	538	17.8	22	2.4	131.6	3.9	7.4	13.4	4.4	37.9	70.2	6.46	21.1	3.25	0.46	3	0.48	3	0.57	1.72	0.27	1.92	0.29
119	Boluokenu range	NLKC14-10	Granodiorite	77.26	0.09	12.25	0.0877305	0.49714	0.65	0.02	0.12	0.48	3.97	3.97	0.02	1	n.a.	2	<8	n.a.	0.2	<20	9.7	112.8	69.3	1.6	395	14.6	18.5	1.9	93.7	3	4.3	13.7	2.3	28.4	46.8	4.95	16	2.91	0.22	2.69	0.43	2.53	0.46	1.52	0.25	1.63	0.29
120	Boluokenu range	JHA14-01	Granodiorite	68.8	0.42	14.91	0.498039	2.82222	3.69	0.08	1.2	2.36	3.85	3.41	0.1	1	n.a.	8	50	n.a.	6.3	<20	17.4	142.2	222.2	5.5	410	27.5	14.2	1.3	230.2	6.1	19	20.9	3.3	35.2	68.4	7.26	28.8	5.24	0.94	4.98	0.75	4.81	0.93	2.7	0.43	2.85	0.47
121	Boluokenu range	JHA14-02	Granodiorite	68.53	0.39	15.08	0.471045	2.66926	3.49	0.08	1.08	2.63	4.02	3.43	0.1	1	n.a.	8	45	n.a.	5.4	<20	17.4	141.4	213	5.8	443	26.2	13.7	1.5	242.2	6.4	23.8	19.6	2.7	35.5	73.1	7.28	27.4	5.21	0.97	4.99	0.79	4.76	0.94	2.87	0.44	2.89	0.45
122	Boluokenu range	JHA14-03	Granodiorite	68.79	0.39	15.11	0.454849	2.57748	3.37	0.07	1.03	2.43	4.04	3.61	0.1	0.9	n.a.	7	46	n.a.	5.1	<20	18.6	162.4	247.4	7.1	436	27.5	14.5	1.4	239.5	6.4	18.4	19.7	2.8	34.2	67	7.14	25.8	4.75	0.88	4.86	0.82	4.65	1.01	2.63	0.45	3.05	0.44
123	Boluokenu range	JHA14-04	Granodiorite	68.28	0.42	15.06	0.481843	2.73044	3.57	0.07	1.01	2.61	3.96	3.44	0.1	1.3	n.a.	8	48	n.a.	5.6	<20	18.1	148.8	175.4	5.9	435	25.9	13.9	1.4	220.9	6.3	24.1	19.2	2.7	39.7	69.8	7.24	26.9	4.77	0.88	4.95	0.75	4.25	0.92	2.58	0.41	2.91	0.44
124	Boluokenu range	JHA14-05	Granodiorite	69.52	0.36	14.79	0.415708	2.35568	3.08	0.06	0.95	1.79	3.93	3.76	0.09	1.5	n.a.	7	39	n.a.	5.5	<20	17.6	156.6	224.5	6.4	456	26.3	14.4	1.6	211.6	6.1	11.7	18.7	3	35.5	69.1	7.01	23.8	4.29	0.84	4.66	0.72	4.44	0.83	2.54	0.46	2.94	0.48
125	Boluokenu range	JHA14-06	Granodiorite	69.97	0.31	14.64	0.368468	2.08799	2.73	0.06	0.82	1.73	4.19	3.74	0.08	1.5	n.a.	6	38	n.a.	4.8	<20	15.7	155.6	187.7	6.1	482	24.5	12.9	1.4	207	6	9.9	19.2	3.1	42.3	81.5	7.83	26.4	4.74	0.8	4.44	0.71	4.18	0.87	2.55	0.42	2.84	0.46
126	Boluokenu range	JHA14-07	Granodiorite	69.66	0.33	14.79	0.380615	2.15682	2.82	0.06	0.84	1.93	3.9	3.69	0.09	1.7	n.a.	6	37	n.a.	4.5	<20	17.4	154.1	208.5	5.9	457	24.8	13.4	1.4	204.1	6.2	9.1	19.5	3.1	40.2	74.2	7.59	26.5	4.77	0.77	4.42	0.71	4.04	0.87	2.63	0.4	2.79	0.4
127	Boluokenu range	JHA14-08	Granodiorite	68.6	0.43	14.79	0.491291	2.78398	3.64	0.07	1.13	2.94	3.68	3.47	0.11	1	n.a.	8	52	n.a.	5.5	<20	16.4	135.6	199.7	6.8	426	21.5	11.4	1.1	217.9	5.9	10.3	13.4	2.7	29.3	54.5	5.76	21.2	4.13	0.77	4	0.63	3.92	0.8	2.29	0.36	2.19	0.37
128	Boluokenu range	JHA14-09	Granodiorite	68.97	0.41	14.67	0.452149	2.56218	3.35	0.07	1.04	2.78	3.76	3.22	0.1	1.5	n.a.	6	49	n.a.	5.9	<20	16.8	130	189.6	5.5	360	22.1	14	1.9	193.2	5.6	9.9	17.8	3.6	26.3	49.2	5.28	19.3	3.72	0.71	3.58	0.6	3.48	0.74	2.2	0.39	2.63	0.41
129	Boluokenu range	JHA14-10	Granodiorite	68.38	0.38	15.48	0.431904	2.44746	3.2	0.07	1.03	2.87	4.01	3.51	0.1	0.8	n.a.	7	49	n.a.	5.6	<20	16.1	148.4	215.9	6	419	21.5	12.4	1.2	183.7	5.1	9.4	16	2.5	24	44.6	4.89	18.6	3.56	0.84	3.53	0.62	3.52	0.75	2.29	0.36	2.58	0.43
130	Boluokenu range	JHA14-11	Granodiorite	68.49	0.39	15.14	0.4508	2.55453	3.34	0.06	1.06	2.47	3.74	3.6	0.1	1.4	n.a.	7	45	n.a.	5.5	<20	17.6	158.5	217.3	6.4	378	23	12.7	1.5	220.2	6.5	9.6	18.8	4.4	21.5	41.2	4.62	19	3.62	0.69	3.72	0.64	3.66	0.81	2.42	0.4	2.71	0.42
131	Boluokenu range	JHA14-12	Granodiorite	69.44	0.41	14.59	0.466996	2.64631	3.46	0.07	1.06	2.67	3.5	3.57	0.11	0.9	n.a.	6	48	n.a.	5.9	<20	15.7	146.4	218.6	5.5	417	20.7	11.6	0.7	217.4	5.6	9.8	20.4	2.9	26.3	50.6	5.11	20.4	3.64	0.79	3.47	0.56	3.08	0.72	1.98	0.3	2.22	0.33
132	Boluokenu range	13XTS-253	Biotitemonzogranite	65.65	0.53	15.8	n.a.	n.a.	4.13	0.06	1.46	3.14	4.04	3.59	0.17	1.59	100.16	6.78	65.3	5.76	49	5.63	19.4	123	370	2.11	451	18.9	30.2	1.98	201	4.84	10.3	20.2	3.8	43.4	76.1	7.82	26.3	4.54	1.07	3.99	0.56	3.16	0.63	1.82	0.28	1.97	0.31
133	Boluokenu range	13XTS-254	Biotitemonzogranite	67.16	0.46	15.38	n.a.	n.a.	3.58	0.08	1.33	3.15	3.95	3.72	0.14	0.57	99.52	6.41	57.2	8.78	52.1	7.85	18.8	145	322	5.15	405	21.7	32.9	2.83	192	4.81	15.1	22.9	4.3	37.8	68	7.23	24.6	4.73	1.03	4.01	0.58	3.44	0.69	2.06	0.32	2.27	0.35
134	Boluokenu range	13XTS-256	Biotitemonzogranite	66.82	0.51	15.46	n.a.	n.a.	3.98	0.06	1.35	2.92	3.91	3.64	0.17	1.58	100.4	6.33	62.4	6.77	40.5	5.68	19.1	114	393	2.29	468	22.3	34.1	2.64	202	4.9	10.3	20.6	3.49	41	74.2	7.85	26.7	4.96	1.1	4.25	0.61	3.54	0.72	2.09	0.32	2.28	0.35
135	Boluokenu range	13XTS-260	Biotitemonzogranite	66.4	0.5	15.23	n.a.	n.a.	4	0.1	1.43	2.92	4.01	3.8	0.16	1.14	99.69	6.99	63.1	6.63	33.8	5.74	18.9	134	331	2.45	498	19.7	33.5	2.49	210	5.21	12.6	23.5	3.68	43.7	76.1	7.62	25.5	4.32	1.01	3.93	0.55	3.23	0.64	1.91	0.3	2.14	0.35
136	Boluokenu range	13XTS-75	Monzogranite	69.76	0.35	14.71	n.a.	n.a.	3.13	0.06	0.93	2.21	3.87	3.67	0.09	1	99.78	6.59	35.4	4.68	53.9	4.79	17.6	142	199	6.71	468	27.6	13.9	1.27	219	5.57	19.4	18.3	2.87	36.8	72.5	7.78	27.6	5.09	0.85	4.73	0.71	4.42	0.91	2.7	0.41	2.73	0.41
137	Boluokenu range	13XTS-80	Monzogranite	68.66	0.4	14.83	n.a.	n.a.	3.6	0.07	1.08	2.32	3.88	3.55	0.1	1.03	99.52	7.68	43.2	8.14	38.2	6.04	18.3	160	213	6.37	436	28.8	15.7	1.4	261	6.56	22.5	18.8	3.19	31.6	62.6	6.93	25.4	4.96	0.88	4.63	0.74	4.61	0.95	2.85	0.42	2.85	0.44
138	Boluokenu range	13XTS-86	Monzogranite	69.68	0.37	14.65	n.a.	n.a.	3.22	0.06	0.89	2.45	3.82	3.78	0.09	0.53	99.54	6.83	40	5.64	45.7	4.97	17.7	169	168	8.41	449	27.1	14.2	1.35	245	6.04	16.2	19.6	5.08	43.3	82.5	8.56	29.5	5.23	0.87	4.78	0.72	4.42	0.9	2.67	0.4	2.71	0.41
139	Boluokenu range	ZKL4-404-1	Monzogranite	64	0.49	15.1	n.a.	n.a.	3.57	0.07	1.86	4.31	2.8	3.19	0.1	0.61	96.1	n.a.	65.1	11	94.6	15.1	n.a.	128	208	n.a.	383	n.a.	20.2	2.01	48.3	1.98	12.7	18.5	4.88	38.8	66.6	7.34	25.9	4.58	0.909	4.31	0.791	4.49	0.86	2.53	0.464	2.98	0.421
140	Boluokenu range	ZKL4-404-2	Monzogranite	62.38	0.54	15.01	n.a.	n.a.	4.14	0.07	2	4.6	2.82	2.66	0.11	0.73	95.06	n.a.	94.7	15.5	104	13.7	n.a.	126	243	n.a.	632	n.a.	27.2	2.59	71	2.69	13.6	23.7	5.8	38.3	72.4	8.06	30	5.48	1.05	4.91	0.926	5.23	1.08	3.12	0.558	3.55	0.52
141	Boluokenu range	ZKL4-404-3	Monzogranite	60.87	0.51	14.92	n.a.	n.a.	4.01	0.07	1.94	4.27	2.81	2.67	0.1	0.56	92.72	n.a.	83.6	13.7	91.3	11.9	n.a.	130	232	n.a.	730	n.a.	23.4	2.28	65.1	2.55	12.8	22.1	4.58	47.3	81.4	8.5	29.5	5.14	1.04	4.86	0.851	4.75	0.959	2.72	0.485	3.2	0.476
142	Boluokenu range	16KK-39-2	Syenogranite	71.26	0.34	14.22	n.a.	n.a.	2.5	0.04	0.62	0.51	3.68	3.39	0.07	1.11	97.74	n.a.	25.2	2.61	96.6	6.63	n.a.	177	127	n.a.	543	n.a.	16.7	1.56	109	4.23	19.4	26.2	2.95	28.5	53.1	6.04	22.8	4.36	0.947	3.87	0.727	4.12	0.804	2.34	0.378	2.65	0.37
143	Boluokenu range	16KK-39-3	Syenogranite	67.71	0.37	13.85	n.a.	n.a.	2.22	0.03	0.55	0.58	3.59	3.54	0.08	1.19	93.7	n.a.	28.6	2.63	97	6.82	n.a.	178	159	n.a.	836	n.a.	17.8	1.57	109	3.89	21	23.3	2.83	35.1	70	7.92	29.7	5.94	0.807	5.24	0.988	5.57	1.07	3.18	0.599	3.97	0.549
144	Boluokenu range	16KK-39-4	Syenogranite	69.75	0.33	13.92	n.a.	n.a.	1.85	0.03	0.47	0.65	3.64	4.01	0.07	0.96	95.69	n.a.	24.4	2.7	94.2	6.68	n.a.	199	169	n.a.	1024	n.a.	15.2	1.49	89.3	3.37	23.3	21.3	2.85	34	67.1	7.97	30.4	5.93	1.02	5.39	0.985	5.77	1.15	3.3	0.613	4.05	0.552
145	Boluokenu range	16KK-39-5	Syenogranite	69.74	0.32	13.86	n.a.	n.a.	1.82	0.04	0.56	0.72	3.64	3.95	0.07	0.9	95.62	n.a.	23.8	2.3	105	8.23	n.a.	191	153	n.a.	948	n.a.	13.9	1.43	70.8	2.79	18.8	21.9	3.29	30.5	59.5	7.08	26.5	5.2	1.06	4.62	0.874	4.86	0.974	2.8	0.524	3.55	0.483
146	Boluokenu range	HL-ZK502-11	Monzogranite	69.8	0.32	13.51	n.a.	n.a.	2.73	0.05	1.36	2.42	3.76	3.95	0.08	2.21	100.2	n.a.	49.63	11.29	218.47	18.45	n.a.	149.75	157.09	n.a.	404.92	n.a.	22.68	2.92	701	6.46	14.59	35.84	7.77	41.36	80.96	8.17	27.57	4.9	0.92	5.31	0.77	4.28	0.88	2.61	0.4	2.98	0.44
147	Boluokenu range	HL-ZK502-29	Monzogranite	73.3	0.07	11.78	n.a.	n.a.	0.58	0.02	0.09	132	3.18	6.06	0.02	1.08	97.51	n.a.	5.58	2.5	291.37	19.53	n.a.	288.95	72.47	n.a.	231.92	n.a.	27.69	3.74	105.3	8.58	13.83	31.22	10.83	43.54	81.98	7.83	24.29	4.05	0.34	4.59	0.67	3.96	0.85	2.65	0.44	3.33	0.49
148	Boluokenu range	HL-ZK1502-6	Monzogranite	66.97	0.06	10.78	n.a.	n.a.	2.1	0.11	3.25	2.06	2.19	4.55	0.02	2.82	94.91	n.a.	n.a.	n.a.	n.a.	n.a.	n.a.	n.a.	n.a.	n.a.	n.a.	n.a.	n.a.	n.a.	n.a.	n.a.	n.a.	n.a.	n.a.	n.a.	n.a.	n.a.	n.a.	n.a.	n.a.	n.a.	n.a.	n.a.	n.a.	n.a.	n.a.	n.a.	n.a.
149	Boluokenu range	HL-ZK1502-8	Monzogranite	75.27	0.06	11.54	n.a.	n.a.	0.41	0.05	1.3	138	3.62	4.26	0.02	1.64	99.53	n.a.	2.93	0.69	124.97	7.27	n.a.	176.05	52.66	n.a.	297.22	n.a.	24.66	2.51	88.17	5.59	10.01	41.12	7.11	31.25	68.3	7.19	24.55	4.94	0.29	5.28	0.86	5	1.02	3.02	0.45	3.08	0.39
150	Boluokenu range	HL-ZK1502-49	Monzogranite	70.97	0.3	14.14	n.a.	n.a.	2.8	0.05	0.92	2.99	3.53	3.47	0.1	1.61	100.88	n.a.	4.6	1.75	316.47	19.79	n.a.	175.55	76.75	n.a.	335.72	n.a.	22.85	3.33	71.49	8.39	4.79	38.95	5.78	35.08	69.16	6.52	20.03	3.54	0.26	3.98	0.62	3.71	0.81	2.56	0.42	3.03	0.41
151	Boluokenu range	12MZK2407-11	Granodiorite	64.37	0.67	15.96	n.a.	n.a.	4.99	0.08	2.36	4.54	3.44	2.75	0.15	0.89	100.19	n.a.	49.27	6.56	256.77	18.45	n.a.	145.95	222.49	n.a.	403.92	n.a.	18.98	2.26	62.89	6.65	14.89	22.43	5.19	38.92	71.41	6.99	22.96	3.87	0.9	4.26	0.59	3.31	0.67	1.96	0.3	2.21	0.33
152	Boluokenu range	12MZK2407-47	Granodiorite	65.74	0.6	15.04	n.a.	n.a.	4.21	0.07	1.79	3.25	4.18	3.71	0.13	1.56	100.29	n.a.	109.3	36.1	95.44	20.06	n.a.	154.37	314.12	n.a.	460	n.a.	24.11	2.66	84.59	5.05	0.6	23.48	7.23	39.79	85.18	9.79	37.01	7.37	1.74	8.55	1.17	6.82	1.35	3.93	0.58	3.95	0.6
153	Boluokenu range	12MZK3602-2	Granodiorite	66.37	0.6	15.09	n.a.	n.a.	4.19	0.09	1.14	1.88	2.9	4.47	0.13	2.89	99.74	n.a.	83.13	25.31	105.88	15.91	n.a.	190.07	247.02	n.a.	565.5	n.a.	25.92	2.73	214.74	8.97	0.65	48.81	9.61	53.23	110.67	12.17	43.83	8.28	1.52	9.78	1.3	7.48	1.48	4.34	0.65	4.29	0.65
154	Boluokenu range	12MZK3602-6	Granodiorite	65.78	0.56	15.08	n.a.	n.a.	3.7	0.12	U9	3.54	3.17	3.76	0.13	2.41	99.44	n.a.	74.27	21.01	90.51	13.49	n.a.	305.27	179.92	n.a.	499.6	n.a.	23.74	2.42	216.54	8.92	0.61	44.33	9.11	67.23	136.57	14.62	51.17	9.04	1.34	10.66	1.31	7.33	1.4	4.11	0.6	4.08	0.61
155	Boluokenu range	12MZK3204-13	Granodiorite	65.45	0.62	15.39	n.a.	n.a.	4.42	0.07	1.96	3.4	3.26	3.54	0.13	1.3	99.54	n.a.	76.14	18.63	113.58	14.44	n.a.	191.77	253.82	n.a.	516.7	n.a.	22.04	1.88	198.34	7.67	0.48	36.95	6.86	49.86	101.57	10.88	37.88	6.74	1.33	8.08	1	5.64	1.09	3.23	0.47	3.16	0.48
156	Boluokenu range	12MZK3204-14	Granodiorite	64.18	0.63	15.07	n.a.	n.a.	480	0.06	2.07	2.86	4.14	3.92	0.14	1.85	99.73	n.a.	82.06	22.72	114.28	16.19	n.a.	191.27	292.12	n.a.	513	n.a.	25.68	2.07	176.24	6.96	0.54	38.72	8.99	56.04	114.57	12.21	42.99	7.89	1.37	9.37	1.2	6.79	1.3	3.81	0.56	3.66	0.54
157	Boluokenu range	K3-1	Syenogranite	70.42	0.3	15.52	n.a.	n.a.	2.06	0.04	0.71	2.3	4.45	2.96	0.09	0.53	99.38	n.a.	23.8	3.11	3	2.13	41.6	64.3	442	n.a.	434	9.77	9.67	0.72	129	3.72	11.88	5.52	1.09	16.15	30.94	3.75	14.32	2.74	0.75	2.55	0.31	1.89	0.34	1.02	0.12	0.96	0.12
158	Boluokenu range	K3-2	Syenogranite	68.79	0.32	15.44	n.a.	n.a.	1.99	0.03	0.77	2.72	3.8	2.61	0.1	3.47	100.04	n.a.	23.7	1.11	2.69	1.21	37.5	66.8	266	n.a.	391	8.04	7.4	0.49	133	3.69	4.78	3.31	0.92	13.96	27.76	3.28	12.56	2.37	0.73	2.17	0.25	1.53	0.27	0.85	0.09	0.8	0.1
159	Boluokenu range	K3-3	Syenogranite	71.15	0.27	15.92	n.a.	n.a.	1.87	0.03	0.63	1.99	4.79	2.68	0.09	1.01	100.43	n.a.	17.1	3.02	2.54	2.2	35.4	66	385	n.a.	364	9.58	8.04	0.64	108	3.24	12.43	4.16	1.14	13.05	26.4	3.04	11.87	2.34	0.62	2.29	0.3	1.83	0.32	1.01	0.12	0.94	0.12
160	Boluokenu range	K2-5	Monzogranite	67.35	0.4	15.25	n.a.	n.a.	3.39	0.04	1.32	3.14	3.12	4.15	0.08	1.06	99.3	n.a.	50.4	7.99	6.74	5.05	32.1	165	196	n.a.	282	15.6	20.6	1.98	124	3.75	11.93	17.2	3.58	20.93	39.13	4.28	15.4	2.92	0.78	3.08	0.43	2.69	0.53	1.68	0.24	1.83	0.27
161	Boluokenu range	K1-1	Granodiorite	63.05	0.58	16.83	n.a.	n.a.	4.75	0.07	1.99	4.1	3.51	3.07	0.12	1.37	99.44	n.a.	76	12.4	10.9	7.83	39.2	104	287	n.a.	375	18.1	21.2	1.58	174	4.75	10.77	11	1.82	27.37	50.36	5.52	20.28	3.92	1.05	4.01	0.53	3.34	0.66	1.99	0.27	1.99	0.29
162	Boluokenu range	K1-4	Granodiorite	63.86	0.64	16.66	n.a.	n.a.	5.12	0.09	2.12	4.44	3.27	3.09	0.12	1.3	100.71	n.a.	83.4	11.8	11.7	7.59	39.7	108	255	n.a.	377	21.6	24.2	1.7	183	4.93	12.57	12.4	2.16	26.38	51.45	5.84	21.91	4.33	1.09	4.64	0.63	4.04	0.77	2.35	0.33	2.31	0.34
163	Boluokenu range	K1-5	Granodiorite	63.58	0.63	17.17	n.a.	n.a.	4.71	0.08	2.07	4.36	3.21	3.07	0.12	1.24	100.24	n.a.	77.5	11.1	10.7	7.19	35.8	112	253	n.a.	322	19.5	22.8	1.48	167	4.51	10.87	13.5	2.14	27.99	51.51	5.78	21.47	4.13	1.06	4.27	0.59	3.66	0.71	2.13	0.29	2.09	0.3
164	Boluokenu range	K1-6	Granodiorite	63.56	0.61	16.03	n.a.	n.a.	4.87	0.08	2.03	4.28	3.21	3.35	0.12	0.83	98.97	n.a.	77.1	10.8	11.4	7.55	40.9	122	233	n.a.	397	22.1	25.2	1.88	193	5.24	12.58	14.7	2.8	21.83	43.82	5.21	20.37	4.31	1.06	4.49	0.63	3.99	0.78	2.38	0.33	2.43	0.35
165	Boluokenu range	K1-7	Granodiorite	63.93	0.61	16.11	n.a.	n.a.	4.81	0.08	2	4.17	3.18	3.49	0.11	0.87	99.36	n.a.	77.2	11.5	11.1	7.44	42	122	228	n.a.	424	19.6	22.2	1.56	173	4.73	12.27	12.4	1.81	30.67	56.71	6.03	21.96	4.16	1.05	4.29	0.59	3.63	0.69	2.11	0.29	2.09	0.31
166	Boluokenu range	K1-11	Granodiorite	63.41	0.6	16.92	n.a.	n.a.	4.56	0.07	1.92	4.35	3.38	3.19	0.11	1.5	100.01	n.a.	72.7	10	10.7	7.06	43.5	114	282	n.a.	436	18.7	23.4	1.8	174	4.79	11.97	13.2	2.58	31.18	57.12	6.15	21.66	4.02	1.1	4.21	0.56	3.45	0.67	2.04	0.28	2.03	0.3
167	Boluokenu range	K1-12	Granodiorite	64.46	0.61	16.7	n.a.	n.a.	4.54	0.07	2.17	4.23	3.41	3.01	0.11	1.08	100.39	n.a.	77.8	12.4	11.1	8.12	37.5	86.5	257	n.a.	357	18.2	19.3	1.18	174	4.61	10.84	10	1.96	22.19	41.42	5.02	19.07	3.81	1.05	3.95	0.55	3.41	0.67	2.04	0.27	1.94	0.28
168	Boluokenu range	kksl1	Granodiorite	65.92	0.47	15.74	n.a.	n.a.	3.9	0.07	1.71	2.13	3.93	3.81	0.1	2.32	100.1	n.a.	59	9.77	8.3	5.84	40.3	127	276	n.a.	448	18.4	23.2	2.77	160	4.87	24.48	15.8	2.18	21.78	41.6	4.8	17.64	3.45	0.91	3.62	0.54	3.28	0.67	2.05	0.29	2.19	0.33
169	Boluokenu range	kksl2	Granodiorite	64.55	0.55	15.58	n.a.	n.a.	4.43	0.07	2.01	1.81	3.82	3.78	0.11	3.15	99.86	n.a.	66.9	12.6	9.33	7.12	39	137	157	n.a.	408	18.8	21.2	1.81	176	5.03	4.94	15.8	2.3	27.83	52.86	5.9	21.46	4.17	0.99	4.13	0.58	3.64	0.71	2.15	0.3	2.16	0.31
170	Boluokenu range	kksl3	Granodiorite	64.55	0.59	15.93	n.a.	n.a.	4.54	0.07	1.79	3.51	3.37	3.65	0.11	1.31	99.42	n.a.	71.1	10.7	9.15	6.34	41.2	118	259	n.a.	414	19.6	25.6	1.77	188	4.99	12.32	15.5	1.98	29.59	53.34	5.8	21.29	4.06	1.04	4.32	0.58	3.61	0.72	2.14	0.29	2.13	0.32
171	Boluokenu range	kksl4	Monzogranite	66.97	0.44	15.71	n.a.	n.a.	3.48	0.06	1.26	3.12	3.41	3.54	0.09	1.27	99.35	n.a.	45.7	6.97	6.98	4.64	40.7	124	269	n.a.	406	20.1	32.1	2.46	199	5.63	14.27	16	2.89	34.17	60.2	6.6	22.99	4.12	0.97	4.28	0.58	3.65	0.72	2.24	0.31	2.22	0.33
172	Boluokenu range	kksl5	Monzogranite	67.94	0.51	14.41	n.a.	n.a.	4.28	0.08	1.59	1.92	3.38	3.82	0.1	1.7	99.73	n.a.	55	8.6	8.21	5.02	37.4	143	206	n.a.	376	30.1	38.6	3.4	220	6.39	13.2	20.6	3.94	36.73	71.82	7.92	28.27	5.62	0.85	5.75	0.83	5.3	1.05	3.24	0.47	3.37	0.5
173	Boluokenu range	kksl6	Monzogranite	63.3	0.61	16.38	n.a.	n.a.	4.7	0.08	2.11	4.29	3.29	3.2	0.12	1.44	99.52	n.a.	76.5	11.5	10.3	7.14	39.8	106	266	n.a.	387	20.1	22.3	1.55	168	4.67	10.82	15.8	2.94	31.68	56.15	6.33	22.99	4.32	1.07	4.36	0.6	3.7	0.73	2.19	0.3	2.17	0.32
174	Boluokenu range	kksl7	Monzogranite	69.16	0.37	14.69	n.a.	n.a.	3.05	0.06	1.16	2.78	3.01	4.03	0.08	1.17	99.56	n.a.	41.5	7.08	5.1	4.33	37.2	150	227	n.a.	390	20	20.4	2.02	166	4.96	13.33	19.2	3.35	25.43	56.74	5.72	20.33	4.01	0.85	4.03	0.54	3.49	0.69	2.19	0.31	2.32	0.35
175	Boluokenu range	kksl8	Syenogranite	67.28	0.41	15.97	n.a.	n.a.	3.37	0.05	1.38	2.21	3.31	4.02	0.09	1.89	99.98	n.a.	48.7	7.65	7.13	4.55	40.1	162	256	n.a.	414	15.9	19.3	1.61	153	4.42	12.8	16.4	2.08	30.64	53.52	5.64	19.32	3.46	0.91	3.51	0.46	2.93	0.56	1.77	0.24	1.78	0.26
176	Boluokenu range	kksl9	Syenogranite	66.26	0.49	16.36	n.a.	n.a.	3.96	0.06	1.52	3.44	3.42	3.42	0.1	1.25	100.28	n.a.	55.2	8.19	7.92	5.25	40.1	126	267	n.a.	399	18.1	23.2	1.79	172	4.76	13.71	13.3	1.8	28.78	51.72	5.79	20.47	3.81	0.98	3.86	0.52	3.21	0.64	1.96	0.27	1.97	0.3
177	Boluokenu range	PM8-1	Diorite porphyry	61.94	0.5	16.27	n.a.	n.a.	5.212	0.18	1.82	3.06	3.31	3.05	0.18	3.72	99.23	n.a.	n.a.	n.a.	n.a.	n.a.	n.a.	136	236	n.a.	418	18.3	12.3	1.16	122	4.64	n.a.	10.8	3.38	29.3	56.7	6.11	22.6	4.22	1.33	4.5	0.62	3.58	0.68	1.94	0.33	2.26	0.32
178	Boluokenu range	PM8-2	Diorite porphyry	58.27	0.44	17.95	n.a.	n.a.	5.11198	0.15	1.63	4.64	1.82	3.89	0.16	5.9	99.95	n.a.	n.a.	n.a.	n.a.	n.a.	n.a.	205	118	n.a.	279	19.5	12.2	1.1	136	4.53	n.a.	10.5	2.89	27.6	53.6	5.84	21.7	4.04	0.98	4.23	0.61	3.69	0.74	2.12	0.36	2.45	0.34
183	Boluokenu range	PM2-2	Monzogranite	64.83	0.52	14.8	n.a.	n.a.	4.34518	0.08	1.81	3.49	3.69	3.76	0.17	1.83	99.32	n.a.	n.a.	n.a.	n.a.	n.a.	n.a.	164	249	n.a.	452	30.7	27.8	2.44	103	5.5	n.a.	25.12	2.92	41.95	80.34	9.25	33.16	6.15	1.06	5.24	1.01	5.18	1.09	2.93	0.56	3.47	0.47
184	Boluokenu range	PM2-8	Monzogranite	65.35	0.54	14.74	n.a.	n.a.	4.41186	0.08	1.84	2.89	3.57	3.89	0.17	1.8	99.28	n.a.	n.a.	n.a.	n.a.	n.a.	n.a.	162	252	n.a.	441	30.71	28.6	2.43	143	6.18	n.a.	25.26	3.13	40.75	82.9	9.37	33.03	6.03	0.98	5.13	0.98	5.06	1.07	2.91	0.58	3.63	0.49
185	Boluokenu range	PM2-9	Monzogranite	65.45	0.52	14.79	n.a.	n.a.	4.22294	0.07	1.66	3.36	3.6	3.87	0.17	1.72	99.43	n.a.	n.a.	n.a.	n.a.	n.a.	n.a.	187	239	n.a.	437	30.33	29	2.74	150	6.7	n.a.	25.26	3.32	40.26	79.86	8.88	31.43	5.87	1	5.01	0.96	4.91	1.06	2.89	0.56	3.53	0.49
186	Boluokenu range	PM3-1	Monzogranite	63.87	0.48	13.63	n.a.	n.a.	4.15626	0.11	1.97	4.13	2.98	3.99	0.14	3.88	99.33	n.a.	n.a.	n.a.	n.a.	n.a.	n.a.	154	110	n.a.	540	24.32	25.82	2.27	108	5.46	n.a.	25.02	3.11	33.23	64.49	7.49	27.39	5.01	0.92	4.15	0.78	3.97	0.85	2.35	0.46	2.88	0.4
187	Boluokenu range	PM3-2	Monzogranite	63.35	0.54	15.58	n.a.	n.a.	4.60078	0.09	1.77	2.45	3.33	4.53	0.16	3.13	99.53	n.a.	n.a.	n.a.	n.a.	n.a.	n.a.	193	139	n.a.	510	32.39	30.64	2.91	87.2	4.49	n.a.	23.38	3.7	38.56	74.94	8.86	32.29	6.25	0.9	5.25	1.04	5.42	1.15	3.09	0.61	3.71	0.5
188	Boluokenu range	PM6-2	Monzogranite	71.15	0.35	13.73	n.a.	n.a.	2.77825	0.07	0.64	1.6	4.41	3.92	0.11	1.05	99.81	n.a.	n.a.	n.a.	n.a.	n.a.	n.a.	161	125	n.a.	582	28.69	15.23	1.34	158	7.77	n.a.	18.09	2.49	37.84	73.64	8.38	30.91	5.76	0.9	4.92	0.95	4.96	1.02	2.71	0.53	3.17	0.43
189	Boluokenu range	PM9-1	Monzogranite	69.26	0.34	14.21	n.a.	n.a.	3.02274	0.07	0.8	1.63	4.15	4.08	0.1	1.4	99.06	n.a.	n.a.	n.a.	n.a.	n.a.	n.a.	166	160	n.a.	395	29.6	16.54	1.49	113	6.36	n.a.	21.08	2.14	37.41	70.03	7.86	28.09	5.34	0.77	4.61	0.92	4.92	1.05	2.84	0.56	3.48	0.47
190	Boluokenu range	AM-B1	Monzogranite	71.35	0.26	12.74	n.a.	n.a.	1.8781	0.01	0.49	1.19	3.97	4.22	0.07	1.81	97.99	n.a.	n.a.	n.a.	n.a.	n.a.	n.a.	188	116	n.a.	524	22.65	26.59	3.51	160	5.55	n.a.	25.85	2.77	57.49	101.5	10.3	34.47	5.6	0.75	5.07	0.82	4.47	0.92	2.63	0.5	3.09	0.49
191	Boluokenu range	AM-B2	Monzogranite	70.72	0.29	14.08	n.a.	n.a.	2.38929	0.01	0.69	1.37	3.36	4.84	0.08	2.22	100.05	n.a.	n.a.	n.a.	n.a.	n.a.	n.a.	201	210	n.a.	471	19.56	25.7	3.09	142	4.99	n.a.	24.14	2.12	46.6	87.1	8.84	31.02	4.94	0.75	4.46	0.76	3.9	0.79	1.28	0.44	2.73	0.43
192	Boluokenu range	AM-B3	Monzogranite	71.56	0.26	13.2	n.a.	n.a.	2.10036	0.02	0.54	1.2	3.75	4.58	0.07	1.74	99.02	n.a.	n.a.	n.a.	n.a.	n.a.	n.a.	225	198	n.a.	371	31.81	34.7	4.84	229	6.22	n.a.	27.5	3.47	44.75	85.98	8.94	30.83	5.71	0.73	5.41	0.99	5.65	1.17	3.33	0.67	4.01	0.63
193	Boluokenu range	AM-B58	Monzogranite	69.31	0.3	13.71	n.a.	n.a.	2.48931	0.02	0.72	1.63	3.82	4.26	0.08	2.12	98.46	n.a.	n.a.	n.a.	n.a.	n.a.	n.a.	212	241	n.a.	452	25.45	24.23	3	137	4.73	n.a.	26.03	2.64	40.3	78.79	8.3	29.13	5.21	0.79	4.72	0.82	4.65	0.94	2.73	0.52	3.2	0.51
194	Boluokenu range	kk-zk001-7	Monzogranite	67.47	0.17	12.46	n.a.	n.a.	1.30022	0.06	1.15	2.73	3.07	6.08	0.06	1.92	96.47	n.a.	n.a.	n.a.	n.a.	n.a.	n.a.	300	390	n.a.	573	14.44	8.13	1.18	109	3.97	n.a.	30.51	14.03	121.7	183.6	18.07	57.06	8.34	1.17	7.28	0.91	3.79	0.63	1.64	0.26	1.63	0.25
195	Boluokenu range	kk-zk001-8	Monzogranite	69.12	0.25	13.04	n.a.	n.a.	2.24483	0.02	0.76	2.19	4.53	4.01	0.07	2.11	98.34	n.a.	n.a.	n.a.	n.a.	n.a.	n.a.	376	376	n.a.	294	57.59	43.96	5.69	110	5.42	n.a.	42.41	7.56	118.8	146.8	15.51	49.64	8.76	0.74	8.7	1.57	9.46	1.96	5.92	1.11	7.12	1.1
196	Boluokenu range	PM6-1	Aplite	76.17	0.08	12.49	n.a.	n.a.	0.722345	0.02	0.06	0.39	3.81	5.35	0.02	0.4	99.52	n.a.	n.a.	n.a.	n.a.	n.a.	n.a.	307	43.2	n.a.	76.2	30.3	19	1.8	106	7.37	n.a.	54.3	6.56	63.9	117	11.6	37	5.98	0.22	6.42	0.92	5.58	1.15	3.5	0.63	4.36	0.59
197	Boluokenu range	PM10-1	Syenogranite	73.91	0.09	12.68	n.a.	n.a.	1.12241	0.04	0.18	2.16	2.92	4.21	0.02	2.45	99.78	n.a.	n.a.	n.a.	n.a.	n.a.	n.a.	217	41.7	n.a.	209	41.98	25.26	3.29	135	8.63	n.a.	45.44	9.24	51.8	97.24	11.21	38.07	6.91	0.2	5.91	1.2	6.69	1.45	4.2	0.89	5.86	0.8
198	Boluokenu range	PM11-2	Syenogranite	75.24	0.13	12.31	n.a.	n.a.	1.05573	0.02	0.24	0.69	3.32	5.29	0.03	0.97	99.3	n.a.	n.a.	n.a.	n.a.	n.a.	n.a.	173	75.5	n.a.	566	22.13	17.19	2.42	103	7.66	n.a.	30.17	4.22	39.76	72.53	8.2	27.44	4.47	0.43	3.65	0.67	3.54	0.76	123	0.48	3.18	0.45
199	Boluokenu range	PM14-1	Syenogranite	69.56	0.29	14.49	n.a.	n.a.	2.4782	0.04	0.48	1.85	4.07	4.39	0.09	2.21	99.95	n.a.	n.a.	n.a.	n.a.	n.a.	n.a.	194	81.9	n.a.	531	18.74	12.54	1.38	72.9	5.03	n.a.	17.1	2.09	27.78	50.9	5.67	20.11	3.72	0.67	3.2	0.61	3.23	0.68	1.84	0.37	2.32	0.31
200	Boluokenu range	12KKPM-14	Syenogranite	75.67	0.11	12.18	n.a.	n.a.	0.700119	0.02	0.25	1.32	3.14	5.65	0.02	0.98	100.03	n.a.	n.a.	n.a.	n.a.	n.a.	n.a.	217	126	n.a.	654	19.81	23.19	3.66	91.5	6.06	n.a.	43.84	5.48	29.97	59.65	5.88	18.58	3.14	0.38	3.57	0.48	3.11	0.66	2.58	0.39	3.11	0.5
201	Boluokenu range	12KKPM-15	Syenogranite	76.8	0.05	12.02	n.a.	n.a.	0.455633	0.01	0.12	0.51	2.95	5.98	0.01	0.59	99.5	n.a.	n.a.	n.a.	n.a.	n.a.	n.a.	284	87.7	n.a.	164	15.55	20.9	2.94	72.9	6.16	n.a.	38.49	4.87	19.74	38.99	3.86	11.45	1.41	0.13	2.73	0.4	2.63	0.55	2.08	0.3	1.34	0.38
202	Boluokenu range	12KKPM-17	Syenogranite	75.62	0.1	12.34	n.a.	n.a.	0.700119	0.02	0.25	1.32	3.12	5.59	0.02	0.84	99.94	n.a.	n.a.	n.a.	n.a.	n.a.	n.a.	210	202	n.a.	501	10.75	12.18	1.57	65.1	4.23	n.a.	36.72	3.25	44.32	74.97	6.69	20.17	1.79	0.85	3.4	0.37	2.11	0.4	1.41	0.19	1.42	0.22
203	Boluokenu range	12KK-20	Syenogranite	68.39	0.38	14.15	n.a.	n.a.	2.95606	0.04	1.24	1.62	3.85	4.37	0.1	2.54	99.64	n.a.	n.a.	n.a.	n.a.	n.a.	n.a.	195	151	n.a.	497	21.23	19.75	2.17	104	4.92	n.a.	27.69	2.72	35.89	73.38	7.82	28.18	5.1	1.01	5.48	0.7	4.27	0.81	2.88	0.38	2.74	0.41
204	Boluokenu range	12KK-21	Syenogranite	67.61	0.35	14.2	n.a.	n.a.	2.75602	0.04	1.14	1.67	4.78	4.2	0.09	2.69	99.52	n.a.	n.a.	n.a.	n.a.	n.a.	n.a.	198	146	n.a.	469	21.57	18.08	104	113	5.16	n.a.	26.63	2.76	32.38	66.35	7.08	25.49	4.65	0.97	5.11	0.69	4.27	0.82	2.91	0.38	2.76	0.41
205	Boluokenu range	12KK-22	Syenogranite	68.21	0.39	14.83	n.a.	n.a.	3.01162	0.06	1.14	2.01	3.54	4.19	0.1	2.07	99.55	n.a.	n.a.	n.a.	n.a.	n.a.	n.a.	175	244	n.a.	585	24.41	19.38	2.04	107	5.16	n.a.	27.44	2.76	35.23	73.39	7.75	28	5.17	1.04	5.74	0.77	4.71	0.9	3.14	0.41	2.97	0.43
206	Boluokenu range	12KK-23	Syenogranite	68.3	0.39	14.98	n.a.	n.a.	3.11164	0.06	1.36	1.38	3.86	4.28	0.1	2.37	100.19	n.a.	n.a.	n.a.	n.a.	n.a.	n.a.	191	198	n.a.	521	21.74	18.44	1.63	100	4.38	n.a.	25.88	2.16	37.23	75.73	7.88	27.99	4.98	0.92	5.56	0.72	4.33	0.83	2.85	0.36	2.54	0.38
207	Boluokenu range	12KK-24	Syenogranite	69.44	0.38	14.65	n.a.	n.a.	3.05607	0.06	1.07	2.13	3.43	4.09	0.1	1.75	100.15	n.a.	n.a.	n.a.	n.a.	n.a.	n.a.	177	268	n.a.	696	26.3	20.38	2.14	122	5.71	n.a.	29.89	2.99	37.36	78.73	8.27	29.89	5.61	1.11	6.2	0.84	5.13	0.98	3.41	0.45	3.22	0.48
208	Boluokenu range	12KK-25	Syenogranite	68.87	0.36	14.56	n.a.	n.a.	2.86715	0.06	1.04	1.87	3.76	4.2	0.1	1.73	99.4	n.a.	n.a.	n.a.	n.a.	n.a.	n.a.	169	238	n.a.	613	22.3	17.56	1.93	103	4.76	n.a.	26.72	2.48	31.1	69	7.09	25.53	4.81	0.99	5.32	0.72	4.34	0.83	1.9	0.38	2.71	0.4
209	Boluokenu range	KKG1	Quartz-diorite	67.32	0.67	15.1	n.a.	n.a.	4.63412	0.07	1.85	3.67	3.81	1.3	0.16	1.84	99.96	9.67	n.a.	n.a.	n.a.	n.a.	n.a.	55.6	263	2.71	513	45	41.6	3.07	208	6.25	n.a.	24.1	4.72	38.9	86.9	9.87	37.3	7.76	1.41	7.88	1.25	8.05	1.61	4.97	0.814	4.95	0.7
210	Boluokenu range	KKG2	Quartz-diorite	67.6	0.62	14.77	n.a.	n.a.	4.85638	0.07	1.77	4.61	3.59	0.99	0.15	1.42	99.95	8.74	n.a.	n.a.	n.a.	n.a.	n.a.	51.2	215	2.52	499	47.2	39.9	3.03	201	6	n.a.	27.7	5.62	41.9	86.8	10.2	39	8.3	1.32	7.91	1.37	8.04	1.66	5.32	0.781	5.3	0.759
211	Boluokenu range	KKG3	Quartz-diorite	66.48	0.65	14.88	n.a.	n.a.	5.68986	0.08	1.9	4	3.46	1.5	0.15	1.74	99.96	9.78	n.a.	n.a.	n.a.	n.a.	n.a.	56.9	230	2.23	614	51	43.2	3.25	244	7.76	n.a.	26.9	6.02	48.8	96.4	11.5	44.5	8.99	1.53	8.64	1.57	8.71	1.73	5.73	0.806	5.76	0.868
212	Boluokenu range	KKG4	Quartz-diorite	67.23	0.63	14.66	n.a.	n.a.	5.3898	0.07	1.84	4.43	3.4	1.15	0.15	1.55	99.96	9.68	n.a.	n.a.	n.a.	n.a.	n.a.	68.1	198	3.71	481	45.6	42.6	3.34	280	8.17	n.a.	27.2	7.46	49.9	98.6	11.7	42.7	8.59	1.42	7.76	1.46	8.02	1.64	5.31	0.838	5.55	0.778
213	Boluokenu range	KKG5	Quartz-diorite	67.13	0.56	14.13	n.a.	n.a.	6.60112	0.07	1.4	4.42	3.41	1.03	0.13	1.73	99.95	8.01	n.a.	n.a.	n.a.	n.a.	n.a.	48.5	274	1.92	206	38.4	29.1	2.61	261	7.8	n.a.	22	5.5	36.6	72.2	8.63	34	7.32	1.28	7.06	1.19	6.86	1.29	4.28	0.672	4.3	0.641
214	Boluokenu range	KKG6	Quartz-diorite	68.17	0.6	14.85	n.a.	n.a.	4.46743	0.08	1.65	3.98	3.88	1.29	0.14	1.32	99.98	9.03	n.a.	n.a.	n.a.	n.a.	n.a.	59.3	262	2.26	275	37.8	30.7	2.48	273	7.97	n.a.	23.1	5.28	43.1	90	10.3	39.5	7.69	1.34	6.93	1.2	7.42	1.33	4.17	0.602	3.99	0.624
215	Boluokenu range	15KK-9	Granodiorite	69.31	0.31	14.96	n.a.	n.a.	1.87	0.04	0.66	2.08	4.3	2.46	0.09	2.29	98.37	n.a.	27.7	2.8	143	9.3	19.8	57.2	596	n.a.	495	11	7.2	0.8	50.6	1.9	10.6	4.1	1	17.5	34.9	4	15.7	2.8	0.7	2.4	0.4	2	0.4	1	0.2	1	0.1
216	Boluokenu range	15KK-10	Granodiorite	66.74	0.29	14.92	n.a.	n.a.	1.75	0.04	0.67	2.05	4.34	2.33	0.08	2.21	95.42	n.a.	24.1	2.5	128	9.2	18.5	52.7	548	n.a.	450	9.6	6.8	0.7	44.5	1.8	8.2	3.7	0.8	14	26.9	3.3	13.5	2.6	0.7	2.1	0.4	1.9	0.3	0.9	0.2	0.9	0.1
217	Boluokenu range	15KK-11	Granodiorite	70.34	0.31	15.09	n.a.	n.a.	1.87	0.05	0.71	2.07	4.62	2.42	0.09	1.86	99.41	n.a.	28.4	2.9	155	10.2	20.5	54.8	746	n.a.	506	11.1	7.5	0.8	51.3	2	11.3	4	0.9	18	34.9	4.2	16.7	2.9	0.8	2.4	0.4	2	0.4	1	0.2	1.1	0.1
218	Boluokenu range	15KK-12	Granodiorite	67.98	0.3	14.78	n.a.	n.a.	1.82	0.04	0.65	2	4.41	2.46	0.08	1.83	96.35	n.a.	27.9	3	136	9.4	19.8	52.5	675	n.a.	474	11	7.3	0.7	52.4	1.9	10.8	4.2	0.9	19.6	38.8	4.6	17.5	3	0.8	2.6	0.4	2	0.3	1	0.2	1	0.1
219	Boluokenu range	15KK-13	Granodiorite	69.75	0.31	15.15	n.a.	n.a.	1.88	0.04	0.7	1.76	4.54	2.53	0.09	1.6	98.34	n.a.	26.9	3	145	10.7	19.4	51.9	711	n.a.	515	10.3	7.3	0.7	47.1	1.8	13.1	3.9	0.9	15.9	32.6	3.7	14.8	2.7	0.7	2.2	0.4	1.9	0.4	1	0.2	1	0.1
220	Boluokenu range	15KK-14	Granodiorite	68.14	0.3	14.8	n.a.	n.a.	1.81	0.03	0.64	1.85	4.58	2.51	0.08	2.03	96.78	n.a.	24.9	2.4	108	8.5	18.3	46.8	533	n.a.	437	9.7	6.7	0.7	46.5	1.8	10	3.7	0.9	16.2	31.7	3.7	14.4	2.7	0.7	2.2	0.4	1.7	0.3	0.9	0.2	0.9	0.1
221	Boluokenu range	PM4-1	Granodiorite	67.98	0.35	15.25	n.a.	n.a.	2.84	0.05	0.77	2.57	4.05	3.57	0.15	1.5	99.08	n.a.	24.9	5.1	162.1	11.9	18	141.1	302.5	n.a.	539.7	20.7	15.9	1.5	108.3	5.8	18.4	14.1	1.6	31.3	60.3	6.7	23.8	4.4	0.9	3.7	0.7	3.6	0.7	1.9	0.4	2.3	0.3
222	Boluokenu range	PM5-1	Granodiorite	59.64	0.58	16.6	n.a.	n.a.	5.01	0.09	2.26	3.31	2.42	5.16	0.16	4.05	99.28	n.a.	76	21.4	104.5	15.9	19.6	233.1	117.2	n.a.	563.9	33	30.1	2.4	97.8	4.8	17.7	23.9	3.7	46.8	88.1	10.3	36.6	6.8	1.1	5.8	1.1	5.5	1.2	3	0.6	3.6	0.5
223	Boluokenu range	kk-zk001-9	Granodiorite	68.49	0.4	14.97	n.a.	n.a.	1.05	0.06	1.19	6.28	5.05	2.35	0.16	1.39	101.39	n.a.	26.3	10	86.8	7.1	21.8	243.3	188.7	n.a.	133.4	60.7	50	4.8	98.3	5.2	18.5	31.9	13.1	58.5	122.4	13.9	49.7	9.7	1	9.4	1.7	10.6	2.2	6.4	1.2	7.2	1.1
224	Boluokenu range	12KK-26	Granodiorite	69.16	0.26	15.13	n.a.	n.a.	1.57	0.03	0.66	3.37	8.28	0.92	0.1	0.73	100.22	n.a.	22	2.2	152.5	9.7	20.9	26.6	603.4	n.a.	313.9	10.3	7.9	0.8	45.8	3.2	5	4.6	1.3	17.5	36.9	4.3	16.4	3.2	0.9	3.2	0.4	2.3	0.4	1.3	0.2	1.1	0.2
225	Boluokenu range	12KK-27	Granodiorite	70.49	0.3	15.54	n.a.	n.a.	1.73	0.03	0.75	3.51	5.25	0.86	0.11	0.78	99.36	n.a.	23.7	2.1	161.7	10.4	21.4	30.7	606.3	n.a.	308.5	10.8	9.9	0.9	50	3.4	4.6	5.1	1.5	19.4	40.9	4.7	18.4	3.5	0.9	3.5	0.4	2.4	0.4	1.4	0.2	1.1	0.2
226	Boluokenu range	12KK-28	Granodiorite	70.15	0.29	16.06	n.a.	n.a.	1.13	0.03	0.77	3.8	5.39	0.83	0.13	0.84	99.41	n.a.	8.3	1.9	198.7	12.6	21.8	28.2	639	n.a.	253.8	11	8.3	0.8	50.4	3.8	4.4	5	0.7	17.1	36.8	4.3	17.2	3.3	0.9	3.4	0.4	2.4	0.4	1.4	0.2	1.1	0.2
227	Boluokenu range	12KK-29	Granodiorite	69.71	0.29	16.17	n.a.	n.a.	1.97	0.03	0.74	3.4	5.62	0.95	0.06	0.74	99.67	n.a.	31.1	4.3	169.3	11	22	30.6	664.5	n.a.	335.8	11.7	8.2	0.7	48.1	3.4	4.9	4.6	0.7	18.7	39.2	4.6	17.9	3.5	0.9	3.5	0.4	2.5	0.5	1.5	0.2	1.2	0.2
228	Boluokenu range	12KK-30	Granodiorite	72.39	0.27	13.49	n.a.	n.a.	1.92	0.05	1.13	2.88	3.27	3.19	0.06	1.48	100.13	n.a.	36.3	4.5	177.6	12.4	19.2	132.5	326.8	n.a.	474	30.6	24.9	2.7	131.6	6.1	5.5	27.5	5.3	45.4	87.7	8.9	31.2	5.6	0.9	6.4	0.9	5.6	1.1	3.8	0.5	3.7	0.5
229	Boluokenu range	16KK-20	Granodiorite	66.48	0.48	15.11	n.a.	n.a.	3.99	0.06	1.74	4.07	3.16	2.44	0.12	0.89	98.52	n.a.	66.8	12.5	92.4	11	19.8	99.2	295	n.a.	586	28.2	18.7	2.1	93.8	3.3	13.7	16.1	3.5	34.3	62.3	7	25.5	4.7	1	4.3	0.8	4.5	0.9	2.6	0.5	3.1	0.5
230	Boluokenu range	16KK-21	Granodiorite	62.34	0.51	15.69	n.a.	n.a.	4.51	0.07	1.88	4.16	2.98	2.45	0.13	0.99	95.69	n.a.	72.4	10.5	82.8	10.4	20	121	341	n.a.	488	25.6	18.1	1.5	87	2.9	9.1	10.6	1.3	24.6	47.4	5.6	22.2	4.5	1	3.9	0.8	4.1	0.9	2.5	0.4	2.8	0.4
231	Boluokenu range	16KK-22	Granodiorite	66.6	0.51	15.32	n.a.	n.a.	4.29	0.07	1.81	4.27	3.23	2.49	0.13	0.84	99.57	n.a.	76	10.8	125	13.1	20.2	102	300	n.a.	431	27.4	19	1.8	81.1	2.8	12.1	14.9	3.7	34.5	61.7	6.8	25.7	4.8	1	4.3	0.8	4.4	0.9	2.5	0.5	3	0.4
232	Boluokenu range	16KK-23	Granodiorite	64.35	0.51	15.52	n.a.	n.a.	4.53	0.08	1.82	4.12	3.29	2.61	0.13	1.03	97.98	n.a.	68.8	10.3	90.3	11.6	20.1	116	337	n.a.	649	25.3	17.4	1.4	87	2.8	12.7	12.7	2.5	30.3	56.8	6.5	24.5	4.5	1.1	4.2	0.8	4.2	0.8	2.4	0.4	2.8	0.4
233	Boluokenu range	16KK-24	Granodiorite	62.1	0.5	15.45	n.a.	n.a.	4.57	0.07	1.9	4.11	2.93	2.59	0.12	1.23	95.59	n.a.	72.7	10.4	115	12	19.9	125	335	n.a.	577	26.7	17	1.4	86.8	2.8	8.7	12.5	1.3	40.1	71.4	7.7	27.8	5	1.1	4.6	0.8	4.5	0.9	2.5	0.4	2.9	0.4
234	Boluokenu range	16KK-25	Granodiorite	64.37	0.54	15.62	n.a.	n.a.	4.8	0.08	1.9	4.41	2.94	2.59	0.13	1.01	98.39	n.a.	66.8	10.2	83.5	9.8	17.8	103	279	n.a.	482	23.4	16.9	1.4	64.3	2.3	8.6	10	1.1	28.5	53.1	6	22.8	4.4	0.9	3.9	0.7	4.1	0.8	2.3	0.4	2.7	0.4
235	Boluokenu range	Kb1	Granodiorite	65.46	0.54	15.54	n.a.	n.a.	4.03	0.19	1.54	3.99	4.42	2.08	0.15	1.99	99.93	n.a.	n.a.	n.a.	n.a.	n.a.	n.a.	98.9	536	4.51	3308	48.3	32.8	2.6	228	7.2	n.a.	26.9	5.6	48	100	12.1	42.4	7.6	2.8	8.3	1.29	7.4	1.5	4.8	0.8	5.2	0.8
236	Boluokenu range	Kb2	Granodiorite	67.04	0.46	15.34	n.a.	n.a.	3.83	0.07	1.57	3.32	3.38	3.55	0.11	1.32	99.99	n.a.	n.a.	n.a.	n.a.	n.a.	n.a.	141	285	8.04	507	24.9	20.1	2	150	5.1	n.a.	20.4	2.8	38.9	66.9	7.3	24.4	4.5	1.1	4.3	0.8	4.4	0.8	2.8	0.4	2.9	0.4
237	Boluokenu range	Kb3	Granodiorite	63.62	0.63	16.4	n.a.	n.a.	3.01	0.07	2.26	5.23	4.06	2.82	0.14	1.71	99.95	n.a.	n.a.	n.a.	n.a.	n.a.	n.a.	89.2	357	6.55	477	29	20.3	1.8	88.5	3.1	n.a.	13.1	3.5	39.1	76.5	8.6	30.8	5.8	1.5	5.2	0.9	4.9	1	3.1	0.5	3.4	0.5
238	Boluokenu range	Kb4	Granodiorite	66.76	0.41	14.69	n.a.	n.a.	3.85	0.07	1.23	4.1	2.87	3.92	0.1	1.95	99.95	n.a.	n.a.	n.a.	n.a.	n.a.	n.a.	180	218	4.16	644	24.6	19.7	1.9	124	4	n.a.	20.6	3.5	41.7	72	7.7	27.2	4.2	1.2	4.1	0.7	4.3	0.8	2.5	0.4	2.6	0.5
239	Boluokenu range	Kb5	Granodiorite	64.83	0.59	16.29	n.a.	n.a.	4.16	0.09	2.4	4.08	4.58	1.53	0.14	1.27	99.96	n.a.	n.a.	n.a.	n.a.	n.a.	n.a.	44.3	317	5.52	330	28.7	21.6	2	103	3.6	n.a.	16.4	3.3	46.1	80.1	8.2	28.5	5.7	1	5.2	0.9	4.8	0.9	3.2	0.5	3.1	0.5
240	Boluokenu range	Hb1	Granodiorite	65.61	0.52	15.32	n.a.	n.a.	4.58	0.07	1.85	3.03	3.57	3.55	0.13	1.76	99.99	n.a.	n.a.	n.a.	n.a.	n.a.	n.a.	136	281	5.88	483	34.3	31.2	2.8	208	6.7	n.a.	22.5	3.2	40.6	78.9	8.7	31.9	6.2	1.2	6	1	6.2	1.2	3.8	0.6	4.1	0.6
241	Boluokenu range	Hb2	Granodiorite	63.9	0.54	15.68	n.a.	n.a.	4.73	0.07	2.05	2.57	2.66	4.14	0.12	3.5	99.96	n.a.	n.a.	n.a.	n.a.	n.a.	n.a.	203	164	4.63	432	31.9	32.5	3	195	6.2	n.a.	23	3.2	44.7	79.5	9.3	32.3	5.7	1.1	5.6	0.9	5.9	1	3.5	0.5	3.6	0.6
242	Boluokenu range	Hb3	Granodiorite	65.17	0.51	15.41	n.a.	n.a.	4.52	0.08	1.71	3.4	3.91	3.35	0.12	1.78	99.96	n.a.	n.a.	n.a.	n.a.	n.a.	n.a.	159	383	2.95	1699	40.3	36.4	3.8	187	5.9	n.a.	26.9	5.1	38	75.7	8.9	33.8	6.9	2	6.5	1.2	6.9	1.3	4.3	0.7	4.8	0.7
243	Boluokenu range	Hb4	Granodiorite	67.84	0.25	14.86	n.a.	n.a.	3.66	0.06	1.14	2.45	3.88	4.26	0.09	1.49	99.98	n.a.	n.a.	n.a.	n.a.	n.a.	n.a.	158	578	11.1	5311	35.4	34.2	2.9	252	7.3	n.a.	26.3	3.7	54.1	98.2	11.1	37.3	6.6	3.7	7.1	1	5.9	1.2	3.9	0.6	4	0.6
244	Boluokenu range	Hb5	Granodiorite	65.83	0.45	15.56	n.a.	n.a.	4.64	0.07	1.78	3.56	3.38	3.35	0.13	1.21	99.96	n.a.	n.a.	n.a.	n.a.	n.a.	n.a.	127	577	3.05	4662	35.9	30.2	2.5	192	5.8	n.a.	20.3	2.1	36.8	70.8	8.4	31.4	6.5	3.7	6.4	1	6.3	1.2	3.8	0.6	3.8	0.6
245	Boluokenu range	D3-01	Porphyry monzonite	76.55	0.41	7.19	n.a.	n.a.	2.72	0.1	2.41	3.39	2.36	0.73	0.19	1.94	97.99	n.a.	62.9	76.7	11	30.8	10.9	32.6	67.6	n.a.	85.4	17.3	16.4	0.7	99.9	2.4	20	5.9	1.9	16.9	34.5	4.1	16.4	3.5	1	3.3	0.5	3.1	0.6	1.8	0.3	1.6	0.2
246	Boluokenu range	D7-3	Porphyry monzonite	65.76	0.54	14.97	n.a.	n.a.	2.38	0.08	1.91	3.71	3.4	4.44	0.13	1.7	99.02	n.a.	69.3	20.1	7.4	30	20.3	217.2	147	n.a.	599	17.3	19.2	1.1	142.6	3.3	43.4	8.9	2.5	20.7	43.2	4.9	19.2	3.9	1.2	3.6	0.5	3.1	0.6	1.8	0.3	1.7	0.3
247	Boluokenu range	D8-01	Porphyry monzonite	70.21	0.32	14.54	n.a.	n.a.	1.97	0.08	1.91	2.36	3.06	4.04	0.09	0.86	99.44	n.a.	28.6	13.1	5.5	6	19.4	114.6	244.1	n.a.	431	19.3	19.3	2.1	141.2	3.5	20.2	14.3	5.6	23.1	53	5.3	19.3	3.9	0.9	3.6	0.6	3.5	0.7	2.1	0.3	2.1	0.3
248	Boluokenu range	D9-02	Porphyry monzonite	70.31	0.35	14.08	n.a.	n.a.	2.31	0.07	1.28	0.52	2.83	4.57	0.11	1.58	98.01	n.a.	36.5	12.9	7.3	6	20.6	146.4	152.1	n.a.	600	20.7	24.1	1.6	132.7	3.3	14.1	13.2	2.8	31.2	57.9	6.7	24.1	4.6	0.9	4.1	0.6	3.9	0.8	2.2	0.3	2.2	0.3
249	Boluokenu range	D10-01	Porphyry monzonite	69.03	0.35	14.51	n.a.	n.a.	2.96	0.08	0.93	2.29	3.19	4.11	0.12	1.5	99.07	n.a.	29.2	11.2	5.3	5.1	23.2	114	270.5	n.a.	508	29.6	33.4	2.2	207.8	4.7	21.6	13.9	3	40.3	80.7	9.1	33.4	6.7	1.2	6	0.9	5.5	1	3	0.5	2.9	0.4
250	Boluokenu range	D12-01	Porphyry monzonite	69.43	0.41	13.7	n.a.	n.a.	2.18	0.1	1.3	2.04	2.84	5.12	0.12	1.22	98.46	n.a.	47.8	14.2	5.3	6	17.9	132.3	373.9	n.a.	501	26.6	25.5	1.3	183.5	4.1	375.2	11.3	2.3	28.3	59.3	6.8	25.5	5.7	1.4	5	0.8	4.6	0.9	2.5	0.4	2.3	0.3
251	Boluokenu range	D14-01	Porphyry monzonite	69.91	0.36	14.13	n.a.	n.a.	1.77	0.07	1.09	2.11	2.75	5.36	0.1	1	98.65	n.a.	37.6	21.2	5.2	14.3	20.9	175.7	357	n.a.	607	18.6	20.5	1.6	181.4	4.1	21.4	15.2	2.3	25.9	49.8	5.6	20.5	4	1.1	3.6	0.6	3.3	0.6	2	0.3	2	0.3
252	Boluokenu range	LLK-1	Porphyry monzonite	67.55	0.37	15.29	n.a.	n.a.	2.05	0.08	0.85	2.33	2.86	5.38	0.14	2.02	98.92	n.a.	27.1	9.2	4.9	4.6	22.3	184.7	301.7	n.a.	635	28.5	34.7	2.2	235.6	5.7	19.5	16.7	1.6	43.1	84.7	9.4	34.7	6.5	1.4	5.9	0.9	5.4	1.1	3	0.5	3	0.4
253	Boluokenu range	LLK-7	Porphyry monzonite	58.49	0.62	16.3	n.a.	n.a.	3.36	0.11	1.68	4.3	3.07	3.41	0.2	6.82	98.36	n.a.	64.5	8.5	5.3	5.9	23.2	189.4	190.6	n.a.	172	20.7	24.5	1.2	180.7	4.1	13.8	5.5	1.9	29.2	56.5	6.4	24.5	4.8	1.1	4.4	0.7	3.9	0.8	2.2	0.3	2.2	0.3
254	Boluokenu range	LLK-15	Porphyry monzonite	69.96	0.24	13.59	n.a.	n.a.	1.31	0.06	0.54	2.57	2.66	4.7	0.11	3.06	98.8	n.a.	17.9	13.3	4.7	6.2	17.3	164	190	n.a.	471	16.9	18.5	1.7	99.2	2.9	14.6	9.5	2.1	22	43.4	5	18.5	3.7	0.9	3.4	0.5	3.2	0.6	1.8	0.3	1.7	0.2
255	Boluokenu range	LLK-9	Granodiorite	58.67	0.51	12.65	n.a.	n.a.	4.19	0.15	1.89	5.21	2.07	2.89	0.14	8.58	96.95	n.a.	69.2	11.8	22.6	9.5	20.1	149	281	n.a.	238	23.1	22	1.4	125.4	3	40.4	5.8	1.9	22	47.6	5.7	22	4.5	1	4.3	0.7	4.3	0.9	2.5	0.4	2.3	0.3
256	Boluokenu range	LLK-12	Granodiorite	66.64	0.32	14.73	n.a.	n.a.	0.82	0.07	0.58	4.15	2.32	4.03	0.13	4.76	98.55	n.a.	24.6	8	2	3	19.1	166.5	186.9	n.a.	353	22.4	25.2	1.7	162.5	4	9.7	13.3	2	30.8	60	6.8	25.2	5	1.1	4.5	0.7	4.1	0.8	2.4	0.4	2.3	0.3
257	Boluokenu range	LLK-13	Granodiorite	61.97	0.65	16.63	n.a.	n.a.	4.62	0.13	2.02	2.88	3.87	2.9	0.19	2.54	98.4	n.a.	72.1	35.7	10	7.3	23.8	120.9	435	n.a.	489	20.5	23.5	1.1	164	3.7	19.8	6.2	2.6	26.5	52.7	6.1	23.5	4.5	1.2	4.3	0.6	3.8	0.8	2.2	0.3	2.1	0.3
258	Boluokenu range	10HL-9	Monzogranite	77.1	0.08	11.8	n.a.	n.a.	0.72	0.01	0.08	0.51	5.3	2.88	n.a.	0.7	99.22	1	n.a.	1	n.a.	n.a.	12.9	216	52.9	3.1	140	13.4	18.9	3.65	81.3	3.2	n.a.	42.5	6.3	32.9	58	5.2	15.7	2.3	0.2	1.7	0.3	1.8	0.4	1.5	0.3	1.9	0.3
259	Boluokenu range	11HL-70	Monzogranite	76.6	0.08	12.45	n.a.	n.a.	0.91	0.01	0.1	0.47	5.19	3.23	n.a.	1.45	100.55	1.3	n.a.	1	n.a.	n.a.	15.3	249	56.2	5.42	120	15.5	24.6	3.34	92.6	3.3	n.a.	47.1	8.4	28.3	50.4	4.6	14.6	2.5	0.2	2.1	0.4	2.4	0.5	1.8	0.3	2.2	0.4
260	Boluokenu range	11HL-71	Monzogranite	77.2	0.1	11.9	n.a.	n.a.	1.16	0.04	0.18	0.76	5.52	2.12	0.01	1.2	100.35	1.3	n.a.	2	n.a.	n.a.	14.3	284	44.4	7.15	160	17.7	24	3.76	78.4	3.1	n.a.	41	6.1	30.5	51.8	4.6	15.2	2.6	0.3	2.3	0.4	2.7	0.6	1.9	0.4	2.3	0.4
261	Boluokenu range	HLGT-09-1	Monzogranite	77.3	0.08	12.1	n.a.	n.a.	0.74	0.01	0.11	0.53	5.51	2.93	n.a.	0.63	99.94	n.a.	n.a.	n.a.	n.a.	n.a.	14.2	250	49.6	3.69	143	17.4	19.8	3.9	90	4.2	n.a.	48.4	6.86	37.2	65.9	6.1	17.2	2.4	0.2	2.1	0.4	2.2	0.5	1.6	0.3	2.4	0.4
262	Boluokenu range	HLGT-09-2	Monzogranite	77.6	0.08	12.1	n.a.	n.a.	0.74	n.a.	0.11	0.47	5.29	3.01	n.a.	0.49	99.89	n.a.	n.a.	n.a.	n.a.	n.a.	14.3	239	54.1	3.46	139.5	17.4	20	4	97	4.2	n.a.	50	6.95	44.3	77.8	7.2	19.8	2.7	0.2	2.2	0.4	2.2	0.5	1.6	0.3	2.4	0.4
263	Boluokenu range	11HL-29	Granodiorite	64.5	0.44	17.15	n.a.	n.a.	1.17	0.13	2.08	5.22	1.81	5.06	0.1	1.53	99.33	8.1	n.a.	7	n.a.	n.a.	18.55	66.8	502	4.18	210	18.8	20.3	1.49	46.1	1.6	n.a.	14.8	3.4	35.9	67.8	6.4	22.1	3.9	0.8	3.4	0.5	3.2	0.7	2	0.3	2	0.3
264	Boluokenu range	11HL-30	Granodiorite	64.4	0.51	16.95	n.a.	n.a.	1.27	0.14	2.36	5.51	2.25	4.57	0.11	1.83	100.05	9	n.a.	8	n.a.	n.a.	18.55	74.9	508	4.59	260	22.3	21.6	1.72	49	1.7	n.a.	17.1	3.7	39.8	77	7.4	25.8	4.7	1	4	0.6	3.9	0.8	2.3	0.4	2.3	0.4
265	Boluokenu range	HLGT-08	Granodiorite	65.7	0.54	15.7	n.a.	n.a.	4.15	0.08	1.88	2.58	2.96	4.24	0.12	1.87	99.82	n.a.	n.a.	n.a.	n.a.	n.a.	21.2	110	261	4.73	457	29.1	23.4	2.5	198	6.1	n.a.	26.4	4.3	61	108	10.5	33.7	5.5	1	5	0.9	4.7	1	2.8	0.4	3.1	0.5
266	Boluokenu range	HLGT-09	Granodiorite	61.6	0.64	16.2	n.a.	n.a.	5.32	0.09	2.29	4.23	2.68	3.83	0.14	2.27	99.45	10.7	n.a.	8	n.a.	n.a.	21.1	95.8	292	4.52	360	22.2	18.3	1.35	64	2.1	n.a.	12.9	2.1	31.7	58.3	6	22.9	4.6	1.1	4.2	0.7	4.1	0.8	2.4	0.4	2.1	0.4
267	Boluokenu range	11HL-18-1	Diorite	59.3	0.82	16.55	n.a.	n.a.	6.76	0.15	2.46	4.86	2.99	4.04	0.18	1.46	99.77	13.3	n.a.	5	n.a.	n.a.	22.8	82.4	350	4.09	460	31.2	21.1	1.36	77.1	2.5	n.a.	11.9	2.5	31.8	64.6	7.2	29.4	6.5	1.5	6.1	1	5.9	1.2	3.4	0.5	3	0.5
268	Boluokenu range	11HL-18-2	Diorite	57.4	0.8	16.55	n.a.	n.a.	5.55	0.1	3.31	8.18	1.86	3.32	0.15	3.23	100.65	15.4	n.a.	22	n.a.	n.a.	19.6	56.8	410	4.38	310	22	13.3	0.87	51.8	1.7	n.a.	7.4	1.8	23.2	43.8	4.6	18.7	3.9	1.2	4	0.7	4.1	0.8	2.5	0.4	2.2	0.3
269	Boluokenu range	HL-1	Granodiorite	64.04	0.58	16.48	n.a.	n.a.	4.6	0.07	2.08	4.4	3.58	2.46	0.13	1.54	100	8.87	74.6	10.25	10.12	6.2	19.6	93	301	n.a.	399	21.63	17.91	1.54	167	4.49	9	12.87	3.52	35.74	67.74	7.06	24.75	4.43	1.07	4.09	0.65	3.53	0.75	2.03	0.32	2.15	0.31
270	Boluokenu range	HL-2	Granodiorite	65.7	0.61	16.87	n.a.	n.a.	2.77	0.06	2.52	3.29	4.77	1.09	0.13	1.95	99.8	7.82	68.4	10.48	6.91	4.7	20.2	35	366	n.a.	238	18.87	18.08	1.69	216	5.65	10.6	16.07	3.32	31.91	58.4	5.92	20.68	3.59	0.89	3.33	0.56	3.17	0.66	1.89	0.3	2.05	0.29
271	Boluokenu range	HL-3	Granodiorite	62.71	0.69	17.11	n.a.	n.a.	4.84	0.07	2.31	4.64	3.86	1.8	0.16	1.5	99.76	9.77	80.1	9.88	11.53	7.3	19.8	48	418	n.a.	344	19.95	13.01	1.02	187	4.75	7.5	8.99	2.65	19.63	39.89	4.69	18.59	3.84	1.19	3.64	0.58	3.32	0.67	1.99	0.28	1.97	0.29
272	Boluokenu range	HL-4	Granodiorite	61.62	0.76	16.05	n.a.	n.a.	6.2	0.1	2.79	4.91	3.58	1.98	0.17	1.43	99.64	13.94	103.7	14.3	13.72	7.5	20.4	65	316	n.a.	327	31.41	20.12	1.36	232	5.93	9.4	14.88	3.21	42.79	83.26	9.01	32.96	6.3	1.21	6.03	0.91	5.44	1.09	3.05	0.46	3.1	0.46
273	Boluokenu range	HL-5	Granodiorite	68.3	0.41	14.84	n.a.	n.a.	3.62	0.04	1.4	2.84	3.18	3.73	0.09	1.45	99.95	6.32	50.7	7.2	7	3.6	17.1	123	219	n.a.	385	21.35	18.43	2.04	179	5.04	10.5	20.79	6.34	31.84	59.98	6.18	21.12	3.86	0.78	3.44	0.58	3.38	0.71	2.11	0.33	2.36	0.36
274	Boluokenu range	HL-6	Granodiorite	65.88	0.46	15.77	n.a.	n.a.	3.68	0.05	1.52	3.8	3.77	2.61	0.11	1.45	99.15	6.81	49.7	6.47	6.53	4.2	18	90	290	n.a.	307	21.41	16.17	1.73	162	4.54	12	16.04	3.14	25.76	52.78	5.83	20.87	3.89	0.95	3.66	0.59	3.46	0.71	2.07	0.33	2.31	0.34
275	Boluokenu range	C14JH24	K-feldspar granite	70	0.42	13.9	n.a.	n.a.	3.59	0.08	1.09	1.8	3.69	3.78	0.09	1.12	99.6	10.69	53.3	20	7	6.85	18.5	143	187	6.22	415	29.3	14.76	0.86	273	6.32	23.3	18.3	2.63	35.4	68.3	7.46	28	5.03	0.73	4.77	0.827	4.6	0.949	2.82	0.435	2.67	0.426
276	Boluokenu range	C14JH25	K-feldspar granite	69.6	0.39	14.6	n.a.	n.a.	3.49	0.07	1.02	2.14	3.97	3.7	0.09	0.85	99.9	9.66	52.2	14.1	6.38	6.21	20	149	185	6.36	405	31.4	13.68	0.76	272	6.38	21.3	18.9	2.68	43.4	77.6	8.71	30.9	5.45	0.79	4.96	0.846	4.67	0.972	2.97	0.441	2.89	0.438
277	Boluokenu range	C14JH26	K-feldspar granite	70	0.39	14.5	n.a.	n.a.	3.24	0.07	0.97	2.09	3.99	3.65	0.09	0.93	99.9	9.48	48.6	9.83	6.57	4.27	19.2	150	185	5.76	402	29.8	14.94	0.96	252	5.93	23.2	20.6	3.5	38.1	72	8.16	29.2	5.18	0.77	4.69	0.809	4.45	0.962	2.82	0.429	2.74	0.414
278	Boluokenu range	C14JH27	Granodiorite	71.3	0.35	13.95	n.a.	n.a.	2.84	0.05	0.75	1.28	3.49	4.69	0.07	0.93	99.7	8.94	36.1	13.6	5.18	3.75	17.9	175	177	8.25	517	28.2	14.13	0.85	244	6.03	25.5	15.8	3.67	24.4	47.4	5.79	22.2	4.39	0.69	4.24	0.715	4.26	0.885	2.75	0.41	2.64	0.402
279	Boluokenu range	C14JH29	Granodiorite	62.6	0.52	16.1	n.a.	n.a.	5.33	0.16	1.98	2.6	4.2	2.8	0.14	2.67	99.1	10.38	81.2	14.3	6.23	5.47	20.8	110	258	8.51	569	21.1	14.67	0.87	184	4.04	25.4	10.7	4.44	25.3	46	5.22	20.2	3.68	0.9	3.38	0.592	3.3	0.685	1.99	0.293	1.99	0.287
280	Boluokenu range	C14JH30	Granodiorite	63.7	0.5	16.1	n.a.	n.a.	4.32	0.1	1.92	2	3.55	3.73	0.13	2.96	99	10.21	78.5	14.3	7.73	4.23	20.3	163	229	13.2	583	19.3	14.58	0.92	166	3.85	14.1	13.2	6.27	27.5	50	5.53	21.1	3.45	0.81	3.2	0.519	2.91	0.589	1.76	0.277	1.81	0.283
281	Boluokenu range	C14JH31	Granodiorite	63.1	0.52	15.95	n.a.	n.a.	4.65	0.14	1.92	3.02	4.04	2.98	0.14	2.63	99.1	11.65	81.3	16.3	6.28	7.34	20.1	116	431	9.78	580	20.8	14.58	0.87	187	4.12	10.5	12	3.08	25.5	49.3	5.4	21.4	3.75	0.91	3.35	0.571	3.13	0.643	1.84	0.292	1.86	0.29
282	Boluokenu range	C14JH32	Granodiorite	64.1	0.56	15.9	n.a.	n.a.	5.21	0.13	2.07	2.38	3.91	3	0.15	2.45	99.9	11.53	86.5	19.4	8.06	6.63	21.6	127	280	14.9	594	22.5	16.56	0.96	182	4.12	14.7	12.9	6.05	28.8	49.9	6	21.9	3.96	0.94	3.66	0.625	3.56	0.715	2.1	0.326	2.09	0.32
283	Boluokenu range	C14JH34	Monzogranite	69.4	0.42	14.25	n.a.	n.a.	3.32	0.07	0.71	1.74	3.82	3.9	0.09	1.21	98.9	11.73	45.8	11.5	5.42	4.16	20.7	170	154	6.4	523	32	18.09	0.73	249	6.52	25.3	24.6	3.49	38	73.5	8.58	34	5.7	0.78	5.28	0.887	4.77	1.05	3.05	0.47	3.11	0.47
284	Boluokenu range	C14JH35	Monzogranite	70.7	0.3	14.2	n.a.	n.a.	2.63	0.06	0.57	1.63	3.72	4.17	0.07	2.01	100.1	8.2	30.2	9.42	4.47	3.87	18.5	188	95.9	9.26	385	24.9	13.05	0.85	203	4.89	83.4	21.6	2.53	36.9	67.7	7.33	26.5	4.36	0.64	4	0.687	3.79	0.782	2.43	0.374	2.53	0.4
285	Boluokenu range	C14JH36	Monzogranite	70.2	0.41	14.5	n.a.	n.a.	3.39	0.06	0.82	1.7	4.24	3.32	0.09	1.62	100.4	9.32	46.6	12	6.3	5.06	19.2	146	156	11.3	249	30.4	17.19	1.02	243	5.63	21.6	25.5	3.99	30.5	57.4	6.29	23.8	4.22	0.75	4.45	0.762	4.41	0.916	2.82	0.438	2.85	0.429
286	Boluokenu range	C14JH37	Monzogranite	71	0.34	14	n.a.	n.a.	2.83	0.06	0.65	1.58	4	3.96	0.08	0.96	99.5	8.79	37.4	13.8	4.98	3.45	19.1	168	159	8.37	398	31.9	14.76	0.94	222	5.26	23.8	21.4	2.51	33.5	63.8	7.57	27.6	5.07	0.73	5.11	0.819	4.81	0.977	3.13	0.461	3.13	0.483
287	Boluokenu range	YM10-1	Rhyolite	72.5	0.26	13.1	n.a.	n.a.	2.64	0.03	0.45	0.7	0.41	5.38	0.05	3.95	99.47	n.a.	n.a.	n.a.	n.a.	n.a.	n.a.	177	36	7.32	828	26.2	15.9	1.19	157	4.35	12.99	11.7	2.15	36.2	91.4	7.64	27	4.79	0.72	3.93	0.62	3.64	0.8	2.29	0.34	2.34	0.35
288	Boluokenu range	YM11	Rhyolite	70.6	0.25	12.2	n.a.	n.a.	2.72	0.05	0.62	2.11	0.11	5.1	0.06	4.81	98.63	n.a.	n.a.	n.a.	n.a.	n.a.	n.a.	164	47	6.12	798	23.3	15.9	1.14	185	4.52	15.47	11	1.99	32.4	80.4	6.21	20.5	3.88	0.65	3.5	0.56	3.27	0.75	2.13	0.34	2.27	0.36
289	Boluokenu range	YM20	Rhyolite	71.3	0.25	14.2	n.a.	n.a.	1.45	0.05	0.06	0.91	2.96	4.78	0.05	2.55	98.56	n.a.	n.a.	n.a.	n.a.	n.a.	n.a.	147	77	9.46	741	20	31.5	2.74	169	4.54	16.53	19.3	3.22	39.6	92.4	7.27	23.2	3.61	0.56	2.99	0.48	2.75	0.61	1.84	0.28	2.02	0.32
290	Boluokenu range	YM21	Rhyolite	74.1	0.24	13.1	n.a.	n.a.	1.36	0.04	0.11	0.5	2.41	4.42	0.04	2.34	98.66	n.a.	n.a.	n.a.	n.a.	n.a.	n.a.	146	51	9.99	631	16.7	29.4	2.52	175	4.46	12.87	19.1	2.73	37.6	87.2	6.67	21.1	3.27	0.62	2.84	0.43	2.25	0.5	1.55	0.24	1.67	0.25
291	Boluokenu range	YM09	Andesite	56.9	0.97	16.1	n.a.	n.a.	6.52	0.13	4.12	5.31	4.14	1.53	0.12	3.23	99.07	n.a.	n.a.	n.a.	n.a.	n.a.	n.a.	43.5	342	7.12	382	20	10.9	0.6	126	2.89	6.61	3.37	1.22	10.3	31	3.01	12.5	3.12	1.01	3.12	0.56	3.41	0.76	2.11	0.3	1.95	0.3
292	Boluokenu range	YM10	Andesite	54.8	0.93	15.3	n.a.	n.a.	8.2	0.17	4.59	5.47	3.58	0.58	0.14	4.7	98.46	n.a.	n.a.	n.a.	n.a.	n.a.	n.a.	16.7	589	1.82	347	22	6.12	0.46	127	3.27	6.8	3.41	1.29	11.3	32.7	3.12	12.9	3.09	0.95	3.5	0.6	3.46	0.77	2.04	0.32	1.98	0.29
293	Boluokenu range	YM13	Andesite	55.1	0.61	12.7	n.a.	n.a.	4.86	0.1	3.66	8.4	2.77	1.07	0.15	10.5	99.92	n.a.	n.a.	n.a.	n.a.	n.a.	n.a.	42.2	475	5.85	858	20.2	6.22	0.45	123	3.18	5.98	3.57	1.34	21	51	4.39	16.4	3.49	1.02	3.41	0.55	3.32	0.73	2.13	0.3	1.7	0.25
294	Boluokenu range	YM14	Andesite	55	0.75	15.4	n.a.	n.a.	7.56	0.11	5.98	7.38	3.09	1.58	0.16	3.18	100.19	n.a.	n.a.	n.a.	n.a.	n.a.	n.a.	109	204	3.02	365	24.4	14.5	0.97	137	3.62	7.69	8.02	0.86	16	42	3.79	14.8	3.32	1	3.23	0.51	2.92	0.63	1.8	0.25	1.61	0.21
295	Boluokenu range	YM-19	Andesite	57.8	0.84	16.8	n.a.	n.a.	6.97	0.09	3.54	3.06	6.55	0.5	0.16	4.78	101.09	n.a.	n.a.	n.a.	11.19	n.a.	n.a.	89.7	71	3.64	394	22.2	15	0.97	132	3.41	9.91	6.83	0.91	13.3	37.1	3.44	14.4	3.23	0.96	3.2	0.56	3.36	0.72	1.94	0.28	1.85	0.26
296	Boluokenu range	AX44	Andesite	56.1	0.86	17.1	n.a.	n.a.	7.18	0.07	4.49	6.67	2.42	0.88	0.17	3.79	99.73	n.a.	n.a.	n.a.	n.a.	n.a.	n.a.	28.6	326	3.25	178	20.3	5.91	0.45	126	3.22	8.49	3.32	0.96	13.1	37.6	3.54	14.5	3.23	0.99	3.15	0.55	3.15	0.71	1.9	0.27	1.84	0.26
297	Boluokenu range	AX45	Andesite	55.6	0.81	15.8	n.a.	n.a.	7.1	0.1	4.79	5.12	3.13	1.69	0.16	5.03	99.33	n.a.	n.a.	n.a.	n.a.	n.a.	n.a.	57.3	341	2.84	340	20.7	6.19	0.46	127	3.21	9.63	3.66	1.02	13.5	38.6	3.59	14.5	3.31	0.99	3.26	0.52	3.19	0.69	1.96	0.29	1.77	0.25
298	Boluokenu range	AX47	Andesite	54.8	0.95	18.2	n.a.	n.a.	8.05	0.09	2.84	6.02	3.13	1.4	0.2	3.43	99.11	n.a.	n.a.	n.a.	n.a.	n.a.	n.a.	37.4	366	1.99	322	21.2	12.4	0.72	183	4.26	7.39	3.84	1.06	16.6	43.7	3.91	16.2	3.63	1.19	3.32	0.58	3.36	0.72	2.02	0.29	1.84	0.27
303	Boluokenu range	AX-1	Andesite	62.88	0.68	17.08	n.a.	n.a.	4.23	0.078	2.03	2.46	2.23	1.78	0.14	6.28	99.868	15.5	123	n.a.	16.6	27.7	21.1	79.5	153	10.8	653	21.5	9.9	0.872	237	6.42	7.09	7.12	1.89	23.2	45.9	5.37	21.4	4.34	1.21	4.11	0.742	4.31	0.79	2.33	0.379	2.39	0.363
304	Boluokenu range	AX-2	Andesite	60.47	0.7	16.12	n.a.	n.a.	4.99	0.06	3.47	3.65	2.97	1.21	0.15	6.11	99.9	16.4	150	n.a.	14.8	28.7	21.8	47.2	221	11.7	333	20.7	10.1	0.894	134	4.04	7.58	6.32	2.92	21.3	41.2	4.97	19.6	4.06	1.11	3.68	0.71	4.1	0.74	2.1	0.372	2.23	0.383
305	Boluokenu range	AX-3	Andesite	60.07	0.67	16.12	n.a.	n.a.	4.92	0.091	3.17	4.76	2.7	0.97	0.14	6.3	99.911	14.6	125	n.a.	12	27.7	19.5	37.3	241	8.77	273	20	9.59	0.874	208	5.49	5.64	6.6	1.77	21.5	41.5	4.82	19.2	3.66	0.955	3.63	0.68	3.93	0.747	2.19	0.41	2.27	0.361
306	Boluokenu range	AX-4	Andesite	60.74	0.67	16.21	n.a.	n.a.	4.79	0.079	3.33	3.31	2.22	1.38	0.14	7.05	99.919	13.3	115	n.a.	12.5	23.6	19.5	58.3	147	9.85	190	19.5	9.96	0.915	214	5.68	5.31	6.47	1.72	22.2	42	5.06	20.8	4.18	1.15	3.86	0.681	3.85	0.711	2.1	0.398	2.21	0.348
307	Boluokenu range	AX-5	Andesite	59.23	0.66	16.15	n.a.	n.a.	4.91	0.09	3.56	3.99	2	1.44	0.14	7.74	99.91	13	118	n.a.	16.3	23.9	18.1	60.3	157	10.8	165	21	9.11	0.785	205	5.64	5.17	6.25	1.9	22.8	44.8	5.18	21.4	4.25	1.12	4.13	0.735	4.02	0.735	2.11	0.344	2.24	0.338
308	Boluokenu range	WT809	Andesite	55.41	0.77	14.59	n.a.	n.a.	7.54	0.07	9.72	2.18	2.57	0.72	0.09	6.42	100.08	20.4	120	n.a.	33.1	276	14	36.4	81.7	n.a.	59.4	15	4.34	0.36	105	2.71	8.9	3.18	0.9	10.9	22.9	2.73	10.3	2.21	0.75	2.27	0.4	2.6	0.52	1.41	0.25	1.56	0.27
309	Boluokenu range	WT810	Andesite	60.32	0.6	12.3	n.a.	n.a.	6.29	0.08	8.05	3.13	1.65	0.98	0.08	6.7	100.17	13	99.4	n.a.	24.9	171	12.9	53.8	64.1	n.a.	74.7	14.5	4.59	0.38	88.3	2.39	9.66	4.13	1.12	11.6	24.2	2.84	10.6	2.23	0.66	2.18	0.38	2.4	0.49	1.29	0.23	1.41	0.23
310	Boluokenu range	WT818	Andesite	57.93	0.72	15.19	n.a.	n.a.	5.36	0.06	7.65	4.9	2.54	1.76	0.08	3.36	99.56	17	117	n.a.	26.6	182	16.1	59.4	297	n.a.	295	17.4	6.02	0.54	128	3.58	12.2	5.5	1.58	11.3	24.8	3.07	12.2	2.77	0.93	2.85	0.47	3.02	0.6	1.62	0.27	1.66	0.28
311	Boluokenu range	WT819	Andesite	56.23	0.74	15.26	n.a.	n.a.	7.26	0.07	8.47	4.38	2.65	1.45	0.06	3.92	100.49	15.3	118	n.a.	27.2	183	16.1	29.5	294	n.a.	287	17.2	5.74	0.47	114	3.08	11.4	5.11	1.37	11.5	23.4	2.86	11.1	2.52	0.93	2.67	0.46	2.84	0.59	1.64	0.26	1.69	0.26
312	Boluokenu range	WT821	Andesite	60.1	0.68	14.28	n.a.	n.a.	5.38	0.07	6.78	5.88	2.26	0.66	0.07	3.2	99.34	17.4	114	n.a.	26.4	186	15.1	14.2	317	n.a.	198	16.6	5.35	0.44	109	2.91	8.47	4.94	1.23	11.1	24.6	2.95	11.6	2.54	0.87	2.64	0.43	2.75	0.57	1.55	0.25	1.64	0.26
313	Boluokenu range	WT825	Andesite	66.09	0.51	15.67	n.a.	n.a.	4.23	0.04	2.71	0.72	5.17	2.79	0.04	2.02	99.99	7.25	79.3	n.a.	12.2	78.6	14.7	105	371	n.a.	474	14.3	9.53	0.81	95	2.74	16.02	6.62	1.78	12.5	25.4	3.04	10.8	2.28	0.58	2.07	0.37	2.29	0.47	1.35	0.22	1.46	0.24
314	Boluokenu range	AX50	Andesite	57.5	0.82	16	n.a.	n.a.	7.36	0.1	5.55	1.94	5.81	1.74	0.16	4.51	101.49	n.a.	n.a.	n.a.	14.15	n.a.	n.a.	59.8	249	1.42	435	21.9	5.45	0.48	130	3.4	9.16	4.38	0.92	14	39	3.55	14.2	3.17	0.99	3.2	0.52	3.12	0.7	1.97	0.29	1.81	0.28
315	Boluokenu range	AX43	Andesite	59.4	0.68	14	n.a.	n.a.	5.24	0.06	3.08	4.99	1.2	2.85	0.22	8.37	100.09	n.a.	n.a.	n.a.	12.41	n.a.	n.a.	21.9	242	7.69	158	22.7	5.22	0.43	120	3.2	16.77	3.99	2.4	23.8	63.8	5.63	21.7	4.36	0.98	3.9	0.62	3.63	0.76	2.32	0.32	2.25	0.31
316	Boluokenu range	AX46	Andesite	57	0.68	10.9	n.a.	n.a.	4.84	0.06	3.45	7.11	0.99	2.22	0.19	10.72	98.16	n.a.	n.a.	n.a.	11.18	n.a.	n.a.	45.5	103	9.79	148	22	12.3	0.78	130	3.1	16.06	4.67	2.41	22	56.5	5.1	19	3.84	0.9	3.41	0.55	3.09	0.68	2.03	0.28	1.79	0.26
317	Boluokenu range	AX03	Andesite	56.59	0.87	17.08	n.a.	n.a.	7.1	0.09	4.56	6.98	2.64	0.85	0.18	3.08	100.02	25.2	177	n.a.	19.4	21.2	18.5	24.2	353	2.14	214	20.5	6.84	0.51	122	3.64	8.94	3.75	1.06	15.8	33.1	4.21	17.1	3.83	1.07	3.84	0.6	3.61	0.77	2.14	0.33	2.08	0.3
318	Boluokenu range	AX04	Andesite	56.01	0.88	17.21	n.a.	n.a.	7.15	0.08	4.04	7.21	2.76	0.64	0.18	3.95	100.11	25.1	253	n.a.	20.3	21	19	18.5	387	4.12	198	21.7	6.96	0.51	125	3.65	8.83	3.72	1.09	15.6	33.1	4.23	17.5	3.98	1.08	3.95	0.61	3.78	0.81	2.23	0.34	2.12	0.32
319	Boluokenu range	AX14	Andesite	53.3	0.95	18.22	n.a.	n.a.	8.06	0.08	3.36	7.21	3.09	1.08	0.23	4.11	99.69	20.4	158	n.a.	21.4	9.2	20.2	27	365	2.76	289	21.3	13.3	0.62	171	3.94	7.97	4.04	1.07	19.6	40.4	5.06	19.8	4.17	1.23	4.28	0.61	3.74	0.78	2.15	0.33	2.02	0.31
320	Boluokenu range	XJ-325	Andesite	53.42	0.84	16.54	n.a.	n.a.	8.21	0.12	3.13	6.83	3.05	0.6	0.16	8.29	101.19	23.49	130.4	n.a.	18.69	21.45	17.07	24.08	194.8	n.a.	575.6	19.29	5.976	0.437	124.7	3.437	n.a.	4.016	1.04	14.73	32.35	3.938	15.99	3.7	0.99	3.874	0.62	3.551	0.709	2.04	0.316	2.108	0.335
321	Boluokenu range	XJ-326	Andesite	54.04	0.85	16.78	n.a.	n.a.	7.21	0.13	3.4	7.99	2.8	0.52	0.16	7.79	101.67	24.05	180.3	n.a.	20.47	22.84	18。26	22.9	201.9	n.a.	180.4	21.09	6.396	0.446	134.5	3.521	n.a.	4.128	1.14	15.17	34.03	4.202	17.42	3.878	1.053	3.998	0.642	3.769	0.746	2.086	0.322	2.212	0.366
322	Boluokenu range	XJ-327	Andesite	53.18	0.94	17.2	n.a.	n.a.	7.94	0.13	5.98	3.32	5.21	0.22	0.18	5.96	100.26	27.27	22.9	n.a.	26.23	33.06	23	5.84	124.4	n.a.	26.37	23.3	8.115	0.576	165.2	4.16	n.a.	5.895	1.56	18.67	41.36	5.078	20.14	4.389	1.232	4.641	0.707	4.176	0.858	2.339	0.364	2.403	0.394
323	Boluokenu range	XJ-328	Andesite	55.19	1.21	16.55	n.a.	n.a.	7.52	0.12	4.43	6.97	3.21	2.24	0.25	2.23	99.92	22.58	197.3	n.a.	21.56	41.01	19.09	86.8	463.3	n.a.	353.8	30.77	10.35	0.701	220.2	5.405	n.a.	7.989	1.99	23.11	50.95	6.22	25.38	5.507	1.307	5.682	0.904	5.268	1.06	2.922	0.437	2.951	0.481
324	Boluokenu range	XJ-329	Andesite	59.21	0.9	16.32	n.a.	n.a.	5.58	0.1	3.3	3.51	3.32	2.97	0.18	4.42	99.81	16.74	129.8	n.a.	16.95	32.13	19.01	126	194.2	n.a.	538.4	26.19	11.11	0.874	209	5.744	n.a.	10.87	3.12	27.55	58.06	6.757	26.29	5.571	1.169	5.267	0.839	4.875	0.988	2.685	0.417	2.639	0.426
325	Boluokenu range	XJ-335	Rhyolite	68.81	0.44	15.71	n.a.	n.a.	3.12	0.13	0.36	1.46	3.88	4.12	0.12	2.09	100.24	3.55	18.59	n.a.	4.17	2.52	18.83	142.2	145.5	n.a.	638.4	26.9	34.39	2.34	208.8	5.825	n.a.	23.85	4.15	49.49	93.61	10.19	35.51	6.021	1.181	4.922	0.807	4.623	0.916	2.609	0.4	2.813	0.475
326	Boluokenu range	XJ-335-1	Rhyolite	67.42	0.38	14.15	n.a.	n.a.	1.91	0.19	0.41	5.06	1.55	3.49	0.11	5.98	100.65	2.98	21.31	n.a.	2.22	4.62	17.4	141.2	86.66	n.a.	99.68	25.31	31.53	2.087	189.8	5.012	n.a.	20.39	4.92	41.37	81.05	8.941	31.35	5.839	1.422	5.164	0.817	4.31	0.816	2.336	0.353	2.393	0.388
327	Boluokenu range	XJ-336	Rhyolite	68.83	0.43	15.62	n.a.	n.a.	2.52	0.11	0.36	1.75	4.24	3.16	0.1	2.51	99.63	3.02	15.8	n.a.	3.54	4.75	18.75	111.4	128.5	n.a.	441.5	29.24	32.51	2.193	210.8	5.577	n.a.	22.23	4.51	50.25	95.04	10.36	36.66	6.225	1.164	5.132	0.834	4.694	0.952	2.685	0.426	2.941	0.493
332	Boluokenu range	TWE-1	Andesite	58.04	0.8	15.98	n.a.	n.a.	6.14	0.12	4.59	6.09	3.44	0.97	0.17	3.54	99.88	18.6	154	n.a.	25.6	57.5	20	25.7	452	3.16	216	31.9	8.55	0.659	267	7.29	7.98	4.94	1.35	20.2	41	5	21	4.41	1.24	4.4	1	5.45	1.24	3.25	0.49	3.36	0.54
333	Boluokenu range	TWE-2	Andesite	62.15	0.6	15.63	n.a.	n.a.	4.74	0.074	3.52	3.96	3.99	1.85	0.14	3.24	99.894	10.4	81.6	n.a.	15.7	39.7	16.3	51	472	4.1	296	25.8	8.77	0.666	147	4.52	6.96	4.77	1.22	19.6	39.7	4.8	18.9	4.17	1.01	3.9	0.792	4.55	0.911	2.45	0.398	2.52	0.354
334	Boluokenu range	TWE-3	Andesite	57.97	0.81	15.85	n.a.	n.a.	6.32	0.12	5	5.71	3.41	1.03	0.16	3.49	99.87	19.1	137	n.a.	26.2	61.7	19.2	29	436	2.64	210	30.9	8.62	0.708	254	6.64	6.58	4.9	1.3	19.8	40.3	5.01	20.6	4.72	1.14	4.56	0.953	5.3	1.21	3.08	0.498	3.24	0.557
335	Boluokenu range	NM11-21	Andesite	67.18	0.32	15.74	2.25	n.a.	5.83	0.06	0.44	2.16	4.51	3.17	0.07	2.91	101.73	11.1	18.9	7.38	3.31	3.24	21.8	126	185	3.66	745	49.1	56.2	3.64	892	22.6	52.9	16.4	5.5	57.4	103	11.9	47.9	8.35	2.29	7.75	1.46	8.63	1.74	5.26	0.87	6.17	0.96
336	Boluokenu range	NM11-28	Andesite	53.33	1.06	15.39	5.1	n.a.	12.34	0.19	2.11	6.76	5.08	2.32	0.32	6.44	104	12.6	87.4	8.1	13.9	10.4	19.5	56.1	253	1.65	1102	39.4	45.4	3.02	721	17	8.51	11.6	6.16	39.3	74.4	9.1	35.8	6.77	2.26	6.97	1.34	6.82	1.45	4.18	0.62	4.37	0.68
337	Boluokenu range	NM11-30	Andesite	55.18	0.99	15.65	3.95	n.a.	9.54	0.28	2.48	6.65	4.64	1.39	0.31	7.09	101.06	11.6	71.9	6.88	7.02	9.73	20	47.2	269	3.89	201	35.5	45	3.09	732	17	12.4	11.8	6.64	43.3	81.9	9.37	35.7	6.57	1.85	5.96	1.16	6.64	1.24	4.03	0.64	4.21	0.6
338	Boluokenu range	NM11-37	Andesite	58.14	1.11	17.15	4.4	n.a.	12.53	0.14	2.26	4.85	3.86	3.54	0.34	0.81	108.32	14.5	95.5	6.97	15.3	10.1	25.5	93.5	487	4.25	907	47.6	61.3	4.1	888	21.6	14.4	16.1	5.16	53.6	99.5	12	45.6	8.6	2.37	8.28	1.56	8.64	1.72	5.05	0.81	5.51	0.86
339	Boluokenu range	NM11-69	Andesite	56.7	1.16	17.03	4.9	n.a.	13.45	0.2	2.49	4.59	3.8	3.7	0.34	1.81	108.36	15.3	113	7.96	17.4	10.7	23.9	102	588	4.3	1158	42.5	44.3	2.78	770	18.4	25	11.6	6.76	44.5	83.7	10.3	40.6	7.6	2.34	7.38	1.37	7.37	1.48	4.69	0.71	5.03	0.68
340	Boluokenu range	NM11-86	Andesite	54.45	1.38	19.71	4.75	n.a.	11.69	0.1	2.22	2.83	4.93	3.14	0.4	4.25	105.6	16.4	118	7.48	5.92	5.68	25.3	95.9	248	5.25	706	42.7	54.8	3.61	853	20.7	1.94	13.8	3.34	51.4	94.9	11.2	43.9	8.47	1.99	7.62	1.4	7.63	1.52	4.74	0.82	4.86	0.74
341	Boluokenu range	NM11-88	Andesite	58.43	1.03	16.61	4.4	n.a.	11.48	0.15	2.03	5.37	3.43	2.94	0.31	2.92	106.18	12.6	105	9.8	13.7	9.66	18.8	84.7	412	3.31	551	31.8	29.7	2.28	548	13.9	22.9	10.3	3.8	31.4	59.2	6.96	27.8	5.25	1.84	5.54	1.01	5.9	1.12	3.19	0.55	3.88	0.59
342	Boluokenu range	NK-37	Dacite	65.87	0.483	14.54	1.16	n.a.	4.05	0.072	0.948	3.34	2.17	3.49	0.13	4.9	96.253	n.a.	n.a.	4.14	n.a.	2.7	n.a.	156	130	6.31	177	35.3	33.2	2.84	149	3.96	13.1	19.5	4.2	48.7	91.7	10.1	35.5	6.37	1.06	5.72	1.06	5.67	1.16	3.46	0.591	3.93	0.544
343	Boluokenu range	NK-38	Dacite	66.41	0.456	13.71	1.49	n.a.	3.76	0.065	0.659	4.1	2.15	3.33	0.125	5.16	96.255	n.a.	n.a.	4.39	n.a.	2.87	n.a.	152	288	6.25	580	33	32.1	2.7	129	3.6	22.2	18.6	4.26	46.6	88.2	9.47	33.6	6.07	1.06	5.48	1.01	5.53	1.11	3.37	0.571	3.85	0.557
344	Boluokenu range	NK-39	Dacite	66.73	0.474	14.39	1.06	n.a.	3.76	0.063	0.712	3.13	2.36	3.75	0.131	4.41	96.56	n.a.	n.a.	4.12	n.a.	2.53	n.a.	172	136	8.33	378	34.5	32.3	2.77	129	3.61	14.9	19.5	4.3	49.5	95.1	10.2	36.2	6.46	1.08	5.69	1.03	5.41	1.14	3.42	0.586	3.96	0.549
345	Boluokenu range	NK-40	Dacite	66.65	0.479	14.37	1.79	n.a.	3.42	0.068	0.733	3.54	2.17	3.55	0.13	4.89	96.9	n.a.	n.a.	4.79	n.a.	2.73	n.a.	163	134	7.56	212	36.2	33.3	2.84	131	3.62	20.7	19.4	4.63	48.4	91.4	9.96	35.5	6.51	1.17	5.85	1.06	5.73	1.18	3.55	0.608	3.91	0.559
346	Boluokenu range	NK-41	Dacite	67.31	0.496	14.62	0.92	n.a.	4.06	0.05	0.652	2.47	2.47	3.61	0.128	4.06	96.786	n.a.	n.a.	4.59	n.a.	2.54	n.a.	172	139	8.45	209	36.5	36.7	3.13	139	3.88	15.8	20.4	5.1	49.2	94.4	10.3	36.2	6.6	1.13	5.92	1.07	5.84	1.17	3.66	0.606	4.08	0.588
350-320Ma magmatic rocks
Mafic rocks
77	Awulale range	10CG29-1	Diorite	51.318	1.08	17.11	n.a.	n.a.	9.79	0.16	4.98	9.75	3.28	0.38	0.13	1.41801	99.396	36.6943	375.939	44.5206	22.3821	20.89	16.8978	8.97356	502.592	0.609365	122.125	17.8212	2.661	0.212696	60.5142	1.79426	2.7999	2.25832	0.467746	8.92685	20.4489	2.78812	12.9699	3.42778	1.19237	3.78518	0.624098	3.86641	0.803742	2.37386	0.371248	2.35822	0.356719
78	Awulale range	10CG29-3	Diorite	49.976	1.16	17.14	n.a.	n.a.	11.38	0.17	5.37	10.1	2.96	0.24	0.15	0.799041	99.445	39.62	378.62	45.444	22.836	15.9192	18.144	2.104	518	0.23122	118.72	16.212	2.3076	0.16915	35.72	1.15394	2.484	0.93566	0.2453	6.802	16.198	2.314	11.328	3.1	1.29536	3.538	0.5775	3.61	0.742	2.188	0.33902	2.1	0.31773
79	Awulale range	10CG29-4	Diorite	50.22	1.09	17.25	n.a.	n.a.	10.85	0.16	4.94	9.27	3.27	0.39	0.13	1.97763	99.5476	36.9	406.56	43.827	24.09	20.0552	17.1885	9.222	550.2	0.79596	150.68	17.622	2.5974	0.179647	63.54	1.84972	3.1968	1.837	0.3784	8.524	19.726	2.688	12.83	3.442	1.17128	3.8	0.62874	3.89	0.8042	2.372	0.37026	2.2995	0.35217
83	Awulale range	BG082-4	Basalt	54.43	0.8	19.5	n.a.	n.a.	10.83	0.13	3.46	1.52	5.83	3.38	0.13	2.4	102.41	n.a.	245	18.62	27.64	5.37	19.78	97.53	291	n.a.	1401	19.32	2.54	0.17	62.95	2.06	1.72	1.58	0.42	18.65	38.6	4.84	20.49	4.61	1.85	4.35	0.68	3.93	0.89	2.28	0.34	2.07	0.33
84	Awulale range	BG083-4	Basalt	53.29	0.91	19.19	n.a.	n.a.	12.6	0.18	4.06	0.82	5.61	3.21	0.14	3.01	103.02	n.a.	363	6.04	27.24	1.5	20.26	68.4	88.59	n.a.	861	18.31	2.76	0.18	63.99	1.88	1.46	1.77	0.7	2.12	5.32	0.81	4.89	2.33	0.92	2.99	0.56	3.52	0.73	2.12	0.32	1.99	0.32
85	Awulale range	BG08-10	Basalt	48.18	0.8	18.42	n.a.	n.a.	16.02	0.33	6.8	1.94	3.72	3.61	0.19	4.83	104.84	n.a.	276	67.04	37.91	32.73	17.95	77.3	86.92	n.a.	1108	14.32	2.02	0.13	53.36	1.6	4.73	1.86	0.57	5.94	12.74	2.01	9.11	2.69	1	2.83	0.52	2.99	0.61	1.66	0.23	1.45	0.23
86	Awulale range	BG08-17	Basalt	53.18	0.83	20.44	n.a.	n.a.	8.21	1.31	4.58	3.27	4.41	3.64	0.15	3.37	103.39	n.a.	241	28.12	28.84	14.8	19.89	111	355	n.a.	2320	15.73	2.42	0.17	59.71	1.86	16.81	1.7	0.48	6.98	16.18	2.38	10.61	2.77	1.02	2.86	0.51	3.08	0.67	1.85	0.27	1.77	0.3
87	Awulale range	BG08-8B	Basalt	50.59	0.8	19.33	n.a.	n.a.	9.65	1.51	7.39	2.29	3.12	5.16	0.16	3.82	103.82	n.a.	260	50.6	48.8	22.5	19.5	119	360	n.a.	4259	15	2.09	0.14	55.1	1.61	5.33	2.01	0.67	9.74	22	3.19	14.5	3.27	1.46	3.15	0.51	2.91	0.62	1.72	0.26	1.64	0.26
88	Awulale range	BG7-1Cu	Basalt	54.36	0.78	19.27	n.a.	n.a.	10.2	0.6	4.03	2.45	4.64	3.53	0.14	3.77	103.77	n.a.	234	23.91	23.49	9.64	18.23	132	235	6.35	1117	16.37	2.16	0.18	54.84	1.88	5.76	1.8	0.57	5.93	14.42	2.14	9.84	2.55	0.85	2.82	0.49	3.31	0.7	2	0.3	1.9	0.29
89	Awulale range	BG7-2Cu	Basalt	52.91	0.76	18.98	n.a.	n.a.	11.05	0.66	4.35	2.75	5.26	3.15	0.14	4.19	104.2	n.a.	225	27.28	25.52	9.74	17.9	107	218	3.62	1081	16.24	2.09	0.17	52.92	1.75	5.73	1.69	0.48	6.01	14.07	2.07	9.36	2.53	0.69	2.82	0.5	3.23	0.69	1.99	0.29	1.87	0.31
90	Awulale range	BG7-3Cu	Basalt	54.57	0.79	19.18	n.a.	n.a.	10.16	0.59	4.03	2.35	4.64	3.55	0.14	3.87	103.87	n.a.	229	23.32	23.17	9.67	17.61	130	220	5.47	1070	16.4	2.2	0.18	55.11	1.83	3.13	1.78	0.53	6.19	15.27	2.31	10.12	2.55	0.87	2.85	0.51	3.19	0.69	1.94	0.28	1.81	0.29
91	Awulale range	BG8	Basalt	47.49	0.72	16.85	n.a.	n.a.	15.41	0.46	7.54	4.14	1.76	5.48	0.15	6.34	106.34	n.a.	216	214	37.9	55.1	15.4	181	93.4	4.16	1571	15.8	1.49	0.12	42.7	1.45	2.51	1.82	0.57	8.92	20.4	2.96	12.9	3.46	1.22	3.52	0.59	3.36	0.65	1.7	0.23	1.47	0.22
92	Awulale range	BG9	Basalt	49.36	0.82	17.35	n.a.	n.a.	14.33	0.79	7.97	1.24	5.09	2.87	0.19	3.24	103.25	n.a.	319	90	46.1	37.1	16.4	43.4	65.3	1.94	537	13.8	1.82	0.13	50.4	1.55	2.51	1.69	0.55	4.28	10.8	1.68	7.65	2.18	0.56	2.36	0.44	2.65	0.55	1.59	0.23	1.56	0.24
93	Awulale range	BG7-1K	Basalt	56.88	0.7	16.33	n.a.	n.a.	11.83	0.16	1.71	4.34	0.84	7.06	0.15	5.18	105.18	n.a.	219	131	26.1	27.5	14.8	287	41.2	6.1	1410	11.8	1.61	0.13	45.1	1.45	2.68	1.87	0.56	4.41	9.79	1.47	6.68	1.95	0.69	2.21	0.39	2.33	0.48	1.36	0.19	1.26	0.2
94	Awulale range	BG7-2K	Basalt	51.7	0.72	16.58	n.a.	n.a.	17.25	0.26	4.04	2.44	1.08	5.77	0.15	4.8	104.79	n.a.	230	140	23.9	38.1	14.2	218	53.1	5.11	1518	12.5	1.71	0.13	46.2	1.52	2.8	1.91	0.54	3.54	8.39	1.26	5.79	1.76	0.46	2.11	0.37	2.34	0.52	1.48	0.21	1.44	0.22
95	Awulale range	11BG01-1	Basalt	57.83	0.76	15.31	n.a.	n.a.	11.45	0.25	4.61	2.94	1.46	5.2	0.17	4.87	104.85	n.a.	219	119.9	26	35.2	14.7	175	49	2.09	1164	22.4	4.02	0.32	131.6	3.41	2.97	6.63	1.94	5.79	16	2.78	13.3	4.05	1.3	3.9	0.73	4.2	0.86	2.31	0.34	2.17	0.35
96	Awulale range	11BG07-1	Basalt	49.58	0.78	20.35	n.a.	n.a.	14.82	0.32	5.49	0.58	2.02	5.9	0.15	4.81	104.8	n.a.	241	57.91	35.52	18.22	18.23	231	77.46	5.36	1821	15.09	2.32	0.18	59.7	1.69	3.39	1.45	0.44	2.3	5.99	0.94	4.76	1.53	0.56	1.87	0.38	2.55	0.6	1.78	0.27	1.83	0.3
97	Awulale range	11BG07-2	Basalt	48.58	0.75	20.33	n.a.	n.a.	15.74	0.34	5.65	0.59	1.99	5.88	0.16	4.79	104.8	n.a.	231	43.35	36.54	17.49	18.06	214	71.33	4.89	1706	14.24	2.33	0.18	56.2	1.6	1.71	1.38	0.43	2.05	5.39	0.86	4.24	1.43	0.52	1.75	0.36	2.4	0.56	1.68	0.26	1.69	0.28
98	Awulale range	11BG07-3	Basalt	51.82	0.74	19.58	n.a.	n.a.	13.97	0.27	5.45	0.56	2.11	5.35	0.15	4.96	104.96	n.a.	237	55.37	32.57	23.19	17.56	214	82.51	6.17	1501	14.83	2.27	0.17	56.7	1.58	3.29	1.41	0.41	6.3	14.5	1.97	8.59	1.93	0.57	2.09	0.38	2.47	0.57	1.71	0.26	1.7	0.28
99	Awulale range	11BG08-1	Basalt	53.68	0.8	19.81	n.a.	n.a.	10.33	0.5	3.92	1.98	5.3	3.48	0.19	3.53	103.52	n.a.	183	14.78	22.83	6.841	18.59	114	200	2.25	1408	19.72	1.87	0.13	47.3	1.4	3.19	0.77	0.25	5.48	13.3	2.08	10.2	2.77	1.07	3.05	0.55	3.46	0.77	2.16	0.32	2.09	0.34
100	Awulale range	11BG11-1	Basalt	52	0.76	20.54	n.a.	n.a.	9.38	1.48	4.43	3.26	4.42	3.57	0.16	3.93	103.93	n.a.	247	34.9	24.98	13.74	19.36	127	344.8	2.71	2138	16.76	2.33	0.18	58.4	1.68	5	1.45	0.45	7.46	17.3	2.37	10.3	2.55	0.99	2.83	0.49	3.05	0.67	1.89	0.28	1.83	0.3
101	Awulale range	11BG13-1	Basalt	52.59	0.68	17.82	n.a.	n.a.	11.21	0.52	5.5	3.27	4.56	3.68	0.17	4.72	104.72	n.a.	250	83.23	27.82	31.98	14.09	107.5	117.2	0.59	1117	15.79	1.82	0.13	48.4	1.34	8.5	1.5	0.37	11.52	24.9	3.21	14.4	3.32	1.27	3.33	0.54	3.07	0.62	1.66	0.24	1.57	0.24
102	Awulale range	11BG14-1	Basalt	53.65	0.79	20.09	n.a.	n.a.	10.09	0.44	3.36	2.52	5.15	3.71	0.19	3.8	103.79	n.a.	192	32.03	23	10.51	19.65	129.5	212.8	2.42	1185	19.8	1.91	0.14	48	1.44	3.52	0.77	0.24	5.05	13	2.04	10.1	2.8	1.08	3.07	0.55	3.54	0.76	2.12	0.32	2.09	0.34
103	Awulale range	S-3	Basaltic andesite	53.73	1.67	18.05	n.a.	n.a.	10.88	0.17	3.87	7.13	2.5	1.53	0.45	0.51	100.49	n.a.	n.a.	n.a.	n.a.	n.a.	n.a.	192.45	59.79	1.41	1402.16	23.33	8.78	0.59	191.73	5.62	n.a.	8.5	2.42	15.83	38.69	4.95	20.51	4.35	1.07	4.36	0.7	4.26	0.93	2.86	0.44	2.94	0.49
104	Awulale range	S-1	Basaltic andesite	52.5	0.63	15.72	n.a.	n.a.	12.36	0.26	4.06	6.14	3.02	2.88	0.15	2.13	99.85	n.a.	n.a.	n.a.	n.a.	n.a.	n.a.	12.24	150	0.41	307.3	51	3.73	0.33	108.7	3.17	n.a.	3.7	1.37	14.49	24.9	3.3	12.98	3.12	0.91	3.53	0.71	3.62	0.9	2.4	0.35	2.3	0.38
105	Awulale range	S-2	Basaltic andesite	53.27	0.86	18.29	n.a.	n.a.	9.63	0.25	3.08	7.27	2.58	3.12	0.23	1.36	99.94	n.a.	n.a.	n.a.	n.a.	n.a.	n.a.	68.18	76.84	1.25	685.1	42.34	2.89	0.25	78.76	2.15	n.a.	1.45	0.51	8.07	15.39	2.24	8.58	2.12	0.81	2.39	0.5	2.49	0.69	1.94	0.31	1.91	0.35
106	Awulale range	S-4	Basaltic andesite	54.9	1.45	18.51	n.a.	n.a.	11.29	0.13	3.22	3.8	4.63	1.91	0.17	0.88	100.89	n.a.	n.a.	n.a.	n.a.	n.a.	n.a.	143.64	60.27	0.62	479.67	87.23	15.53	1	479.67	13.02	n.a.	10.37	3.18	30.91	77.42	10.23	43.99	10.74	2.84	11.57	1.91	12.2	2.59	7.81	1.18	7.98	1.28
107	Awulale range	S-6	Basaltic andesite	56.33	0.62	17.28	n.a.	n.a.	10.14	0.1	2.93	3.15	2.93	5.15	3.67	2.94	0.15	n.a.	n.a.	n.a.	n.a.	n.a.	n.a.	46.66	139.3	4.9	297.6	18.57	5.89	0.43	127.4	3.69	n.a.	4.21	1.63	13.64	27.82	3.94	14.96	3.41	1.06	3.25	0.7	3.44	0.91	2.35	0.39	2.31	0.44
119	Awulale range	H-801-1	Basalt	49.97	1.16	18.87	n.a.	n.a.	6.29	0.42	4.97	7.82	4.77	1.36	0.22	4.38785	100.238	n.a.	n.a.	n.a.	n.a.	n.a.	n.a.	8.64993	326.719	1.17471	294.048	11.7772	6.20806	0.461431	116.342	3.444	n.a.	0.87579	3.76188	10.1421	43.2837	4.82925	19.5944	4.13069	1.40581	4.54146	0.78945	4.71473	1.0398	2.84685	0.407194	2.64427	0.400325
120	Awulale range	H-801-3	Basalt	51.3	1.02	18.27	n.a.	n.a.	10.34	0.13	4.67	2.58	7.33	0.34	0.13	3.92635	100.036	n.a.	n.a.	n.a.	n.a.	n.a.	n.a.	9.91332	90.6818	1.20723	35.039	4.82028	2.59206	0.202988	66.8873	2.12293	n.a.	1.06379	0.904449	6.92864	14.8007	1.88704	7.64541	1.48841	0.507474	1.41366	0.222922	1.31909	0.30634	0.941538	0.151834	1.11598	0.192898
121	Awulale range	H-NX-1	Basalt	51.92	1.29	19.93	n.a.	n.a.	6.42	0.54	2.88	3.18	6.2	2.23	0.22	5.18312	99.9931	n.a.	n.a.	n.a.	n.a.	n.a.	n.a.	53.9392	138.17	2.37982	313.682	19.4061	6.56255	0.507601	134.143	3.94264	n.a.	4.69104	6.93635	17.0317	43.0221	5.69212	20.2988	3.87931	1.56701	4.45613	0.739667	4.37476	0.993666	2.73806	0.405376	2.71161	0.415954
122	Awulale range	H-NXZr-2	Basalt	49.54	1.17	15.86	n.a.	n.a.	8.4	0.13	5.26	8.11	3.26	1.4	0.41	4.48837	98.0284	n.a.	n.a.	n.a.	n.a.	n.a.	n.a.	48.64	705.7	3.83	216	14.57	9.35	0.44	171	3.07	n.a.	0.81	0.58	15.14	39.94	4.74	20.33	4.17	1.29	3.95	0.56	3.1	0.63	1.78	0.25	1.36	0.22
123	Awulale range	H-NX-3	Basaltic andesite	47.92	1.18	19.3	n.a.	n.a.	10.16	0.34	4.57	7.68	3.78	1.28	0.23	3.76876	100.209	n.a.	n.a.	n.a.	n.a.	n.a.	n.a.	64.6403	566.994	5.29531	409.54	23.1642	3.71093	0.24637	92.1444	2.19569	n.a.	2.66727	0.758476	10.9004	26.2117	3.48988	17.3966	4.4334	1.6411	4.97451	0.785708	4.82407	0.964306	2.76	0.42	2.27	0.393419
124	Awulale range	b-III-4	Basaltic andesite	52.64	1.25	17.39	n.a.	n.a.	9.78	0.27	4.52	2.14	6.62	2.27	0.22	3.48622	100.586	n.a.	n.a.	n.a.	n.a.	n.a.	n.a.	40.8246	170.506	2.66234	215.895	20.9432	5.97807	0.539607	130.627	3.85531	n.a.	5.30668	2.19303	11.7607	27.6663	3.65168	15.128	3.81149	1.10777	4.16571	0.770767	4.23561	1.00734	2.76233	0.400983	2.56421	0.391324
125	Awulale range	H-NX-22	Basaltic andesite	48.39	0.91	16.46	n.a.	n.a.	10.47	0.5	7.86	6.29	2.49	1.21	0.15	5.10716	99.8372	n.a.	n.a.	n.a.	n.a.	n.a.	n.a.	93.2331	277.832	8.1767	385.267	19.2092	3.06242	0.212448	68.2152	1.81337	n.a.	2.42873	0.622362	11.1083	24.309	3.15886	14.9179	3.7638	1.48709	4.43375	0.73	4.3	0.96	2.65	0.432877	2.34	0.407923
126	Awulale range	14-5	Basaltic andesite	48.49	1	20.53	n.a.	n.a.	10.5	0.52	5.07	1.9	5.07	2.03	0.2	4.86069	100.171	n.a.	n.a.	n.a.	n.a.	n.a.	n.a.	134.11	294.53	4.5	2164.35	21.23	6.02	0.4	118.13	2.9	n.a.	4.71	1.54	12.68	30.3	3.57	17.03	4.01	1.58	4.62	0.7	4.37	0.89	2.56	0.39	2.14	0.35
127	Awulale range	H-nx-5	Basaltic andesite	50.31	1.04	18.27	n.a.	n.a.	3.82	0.29	4.25	11.88	4.32	1.01	0.18	4.90937	100.279	n.a.	n.a.	n.a.	n.a.	n.a.	n.a.	55.06	367.7	1.17	235.3	25.51	7.48	0.53	123.1	3.57	n.a.	5.56	6.03	16.86	48.47	6.78	26.04	5.36	1.78	6.03	0.98	5.77	1.25	3.45	0.49	3.28	0.5
128	Awulale range	H-NX-2	Basaltic andesite	50.39	1.12	18.48	n.a.	n.a.	8.31	0.33	5.42	6.44	4.15	2.09	0.19	3.75667	100.677	n.a.	n.a.	n.a.	n.a.	n.a.	n.a.	12.304	217.192	1.23233	500.609	18.9262	5.17403	0.407954	108.71	3.23161	n.a.	2.75312	9.81668	10.9637	32.6701	3.89162	14.9338	3.46534	1.4852	4.53683	0.792063	4.8494	1.07063	2.89078	0.41486	2.73466	0.41969
129	Awulale range	H-nx-4	Basaltic andesite	50.49	1.23	18.15	n.a.	n.a.	9.27	0.56	3.85	3.58	6.64	1.14	0.21	5.28225	100.402	n.a.	n.a.	n.a.	n.a.	n.a.	n.a.	20.03	234.1	3.19	226.3	27.72	6.58	0.46	124.2	3.68	n.a.	4.42	7.75	17.43	47.74	6.22	25.76	6.09	1.95	7.03	1.15	6.6	1.4	3.78	0.53	3.4	0.51
133	Awulale range	TS140	Basaltic Trachyandesite	54.4	0.96	17.79	n.a.	n.a.	9.11212	0.16	3.75	4.11	3.88	2.32	0.39	2.64	98.92	n.a.	n.a.	n.a.	n.a.	n.a.	n.a.	71.44	477	2.01	611	21.39	5.44	0.59	140.6	3.58	n.a.	6.53	1.78	19.19	42.75	5.86	22.64	5.64	1.09	4.83	0.75	4.31	0.86	2.46	0.36	2.26	0.36
134	Awulale range	TS200	Basaltic Trachyandesite	55.68	0.72	17.19	n.a.	n.a.	7.26049	0.23	4.93	2.62	5.28	3.68	0.27	3.07	100.64	n.a.	n.a.	n.a.	n.a.	n.a.	n.a.	177.5	192.9	2.48	532	22.47	6.62	0.76	205.4	5.59	n.a.	11.16	3.26	16.82	41.75	5.55	22.42	5.49	1.18	4.67	0.7	4.21	0.85	2.36	0.36	2.5	0.41
159	Awulale range	Zb377	Basalt	53.35	0.92	15.05	n.a.	n.a.	5.77957	0.15	6.86	11.7	3.68	0.7	0.21	1.26	99.6596	n.a.	235	324	13.4	74.2	18.9	45.9	343	1.28	98.9	28.7	4.59	0.38	146	4.29	3.29	5	3.35	7.69	24.6	3.83	19	4.92	1.3	5.29	0.8	5.28	1.1	3.04	0.48	3.29	0.45
160	Awulale range	Zb404	Basalt	52.7	0.74	13.14	n.a.	n.a.	6.92535	0.15	9.54	11.44	2.68	0.88	0.14	1.81	100.145	n.a.	235	806	15	145	15.7	40.5	210	0.45	186	23.8	3.83	0.37	113	3.71	5.15	11.7	6.42	5.89	21.1	3.4	16.5	4.2	1.11	4.24	0.69	4.4	0.93	2.56	0.42	2.98	0.42
161	Awulale range	Zb422	Basalt	46.97	1.17	14.2	n.a.	n.a.	8.95992	0.15	7.75	9.52	2.12	3.9	0.95	3.39	99.0799	n.a.	277	282	31.1	79.4	19.5	111	825	1.43	1747	27.6	4.35	0.26	200	5.68	11.2	9.52	3.24	46.1	105	13.6	62.1	13.2	3.62	11.3	1.3	6.16	1.05	2.59	0.34	2.16	0.3
162	Awulale range	Zb430	Basalt	46.54	1.44	15.87	n.a.	n.a.	10.9637	0.34	9.79	8.81	2.47	0.74	0.3	2.46	99.7237	n.a.	280	316	60.1	191	22.2	50.3	279	2.22	241	24.5	3.97	0.29	114	2.99	12.5	0.76	0.3	10.9	27.5	3.82	18	4.38	1.36	4.89	0.73	4.58	0.92	2.47	0.4	2.49	0.33
163	Awulale range	Zb431	Basalt	53.52	0.87	17.29	n.a.	n.a.	11.5822	0.17	4.53	1.8	6.24	1.86	0.2	2.31	100.372	n.a.	249	18.4	8.82	17.2	25.7	68.7	136	0.64	557	29.8	5.46	0.39	111	3.43	2.1	2.74	2.19	10.9	23.3	3	14.2	4.18	1.15	5.53	0.88	5.55	1.14	2.97	0.44	2.98	0.37
164	Awulale range	Zb440	Basalt	50.98	0.85	16.93	n.a.	n.a.	15.3273	0.09	4	0.74	4.28	4.81	0.14	1.5	99.6473	n.a.	220	5.88	11.3	13.9	17.4	82.8	77.3	0.88	856	17.4	3.71	0.27	81.1	2.51	5.49	0.82	0.34	3.57	9.86	1.14	5.9	1.63	0.4	2.23	0.37	2.56	0.63	1.78	0.3	2.1	0.3
165	Awulale range	Z-6	Basalt	45.82	0.88	16.11	n.a.	n.a.	11.45	0.18	8.1	10.12	2.74	1.8	0.47	1.89	99.56	n.a.	n.a.	n.a.	n.a.	n.a.	n.a.	41.23	418.36	6.23	129.35	27.89	4.15	0.32	129.36	3.21	n.a.	0.97	0.34	16.45	38.15	5.68	18.29	5.57	1.27	6.13	0.81	5.24	1.02	3.21	0.37	2.47	0.39
166	Awulale range	Z-7	Basalt	47.98	0.86	16.08	n.a.	n.a.	9.89	0.24	7.27	9.83	2.57	1.87	0.36	2.54	99.49	n.a.	n.a.	n.a.	n.a.	n.a.	n.a.	92.34	436.17	1.17	451.74	23.64	8.73	0.47	227.57	4.03	n.a.	1.87	0.51	27.37	61.33	7.18	29.78	6.21	1.78	7.01	0.87	5.02	0.87	2.47	0.41	2.07	0.31
167	Awulale range	Z-8	Basalt	48.91	0.3	6.31	n.a.	n.a.	12.87	0.28	8.37	18.24	2.14	0.11	0.09	2.04	99.66	n.a.	n.a.	n.a.	n.a.	n.a.	n.a.	11.34	614.87	4.13	8.94	13.67	3.17	0.24	43.74	0.82	n.a.	0.54	4.31	3.57	7.84	1.03	4.57	1.34	0.3	1.74	0.31	1.67	0.19	1.03	0.13	1.03	0.21
168	Awulale range	Z-9	Basalt	49.74	0.39	12.45	n.a.	n.a.	7.53	3.64	5.43	13.64	3.41	0.71	0.14	2.63	99.71	n.a.	n.a.	n.a.	n.a.	n.a.	n.a.	23.64	24.68	0.27	54.74	17.24	3.04	0.19	51.67	1.46	n.a.	2.04	3.31	3.01	9.03	1.43	6.18	1.74	0.37	2.41	0.37	2.47	0.54	1.77	0.27	2.34	0.37
169	Awulale range	Z-10	Trachy basalt	49.82	0.34	18.01	n.a.	n.a.	8.47	0.11	5.07	10.87	3.89	1.08	0.05	2.35	100.06	n.a.	n.a.	n.a.	n.a.	n.a.	n.a.	27.38	451.37	0.78	118.47	16.37	1.82	0.07	33.17	0.81	n.a.	0.41	3.85	2.54	5.01	0.76	3.21	1.17	0.31	1.61	0.23	1.69	0.41	1.26	0.19	1.23	0.21
170	Awulale range	Z-11	Trachy basalt	50.87	0.73	13.77	n.a.	n.a.	10.35	0.17	7.21	10.04	3.59	1.47	0.11	1.66	99.97	n.a.	n.a.	n.a.	n.a.	n.a.	n.a.	112.36	313.24	0.67	531.24	30.12	4.23	0.24	82.14	2.31	n.a.	4.12	10.08	23.65	51.32	6.31	24.65	6.12	1.44	6.78	0.87	5.33	0.94	2.87	0.39	2.89	0.41
Intermediate-acid rocks
1	Yilianhabierga range	HX1	Biotite granite	75.93	0.27	12.17	0.99	0.83	n.a.	0.04	0.33	0.67	2.99	5.02	0.05	0.65	99.94	5.78	11.2	5.1	1.67	3.16	17.8	186	72	7.98	186	62.1	14.1	2	280	9.29	30.9	11.6	4.32	29.3	75.4	10.7	47.3	12.9	0.74	13.3	2.45	14.6	2.86	8.4	1.06	7.04	1.03
2	Yilianhabierga range	HX2	Biotite granite	68.52	0.56	15.09	2.32	0.64	n.a.	0.05	1.01	1.64	3.37	5.4	0.18	1.12	99.9	9.89	36.2	8.79	5.89	4.79	19.8	208	196	3.72	867	44.5	14.9	1.76	337	8.6	28.7	24.4	4.04	75.5	149	16.8	59.3	11	1.55	9.34	1.7	8.97	1.73	5.38	0.7	4.46	0.68
3	Yilianhabierga range	HX3	Biotite granite	73.72	0.21	13.15	0.88	0.76	n.a.	0.03	0.3	0.64	2.59	6.87	0.05	0.52	99.72	4.59	8.81	5.49	1.37	2.89	15.9	216	59.5	7.46	227	52	10.1	1.33	147	5.48	34.6	17.6	4.51	50.8	104	13.9	55.7	12.4	0.61	11.7	2.2	13.1	2.56	7.49	0.97	5.89	0.86
4	Yilianhabierga range	HX4	Biotite granite	66.93	0.6	15.33	2.68	1.25	n.a.	0.08	0.85	2.22	3.69	4.64	0.16	0.79	99.22	9.89	31.8	11.4	5.89	6.34	20.1	189	156	12.7	698	34.3	13.7	1.37	331	9.15	30.8	13.6	3.39	45.4	92.4	10.9	41.3	8.04	1.62	7.49	1.4	7.57	1.52	4.41	0.57	3.54	0.56
5	Yilianhabierga range	HX5	Biotite granite	67.78	0.87	13.32	4.01	1.43	n.a.	0.1	1.18	2.34	3.27	2.94	0.22	1.46	98.92	12.2	48.6	8.55	8.64	5.15	21.8	105	186	5.81	562	60.5	21.3	2.16	505	12.9	25.5	15.9	4.52	57.5	114	14	54.9	12.3	1.72	11.5	2.15	12.5	2.45	7.62	1	6.69	0.99
6	Yilianhabierga range	HX6	Biotite granite	68.81	0.65	14.72	3	0.87	n.a.	0.08	0.91	0.96	4.48	3.97	0.16	1.31	99.92	6.86	34.2	8.31	6.34	5.22	21.1	172	135	5.33	550	50.9	17.4	1.93	384	10.4	26.9	15.4	3.42	29.1	58.7	8.14	34	8.26	1.76	8.63	1.52	8.87	1.93	6.47	0.9	6.13	0.9
7	Yilianhabierga range	HX7	Biotite granite	73.7	0.2	14.14	1.1	0.27	n.a.	0.03	0.37	1.41	3.49	4.75	0.06	0.54	100.06	3.59	10.4	5.64	1.83	2.73	20	279	89.6	18	347	26	14	1.82	152	4.96	37.9	29.4	8.1	40.2	77.6	9.34	32.5	6.93	0.77	5.51	1.06	5.33	1	3.02	0.41	2.69	0.38
8	Yilianhabierga range	HX8	Biotite granite	72.67	0.24	14.1	1.38	0.25	n.a.	0.03	0.47	1.47	3.46	4.68	0.07	0.54	99.36	4.97	13.4	11.3	2.34	3.83	19.1	208	123	16.5	436	21.7	12.2	1.54	191	5.92	36.3	34.7	8.59	49.4	95.2	11	39.9	7.42	0.98	6.23	0.99	4.77	0.84	2.57	0.32	2.22	0.34
9	Yilianhabierga range	HX9	Biotite granite	73.63	0.21	14.05	1.06	0.4	n.a.	0.03	0.38	1.17	3.78	4.47	0.06	0.64	99.88	4.31	9.34	5.66	1.65	2.71	17.3	221	90.1	11.1	324	21.8	13.5	3.01	141	5.16	38.6	27.7	6.09	38.8	71.7	8.43	29.8	5.87	0.73	5.18	0.9	4.83	0.98	2.93	0.39	2.77	0.41
10	Yilianhabierga range	HX10	Biotite granite	73.58	0.21	14.03	1.06	0.36	n.a.	0.03	0.37	1.42	3.58	4.56	0.06	0.42	99.68	3.91	10.8	13.8	1.88	5.95	20.5	284	87.4	24.7	392	29.9	15.7	3.07	161	5.01	38.5	31.3	8.02	42.7	83	9.68	34.5	7.05	0.7	6.15	1.12	6.01	1.18	3.43	0.48	3.12	0.43
11	Yilianhabierga range	HX11	Biotite granite	73.27	0.23	14.07	1.13	0.42	n.a.	0.03	0.42	1.5	3.47	4.62	0.07	0.64	99.87	3.68	12.5	7.54	2.1	3.78	19.7	279	102	21.5	464	24.1	11.9	1.64	181	5.5	38.8	34.3	6.86	48.9	95.8	11.1	39.7	7.64	0.9	6.04	1.04	5.18	0.93	2.98	0.39	2.53	0.38
12	Yilianhabierga range	HX12	Biotite granite	73.49	0.23	14.07	1.35	0.15	n.a.	0.03	0.42	1.49	3.47	4.57	0.07	0.58	99.92	3.89	12	4.65	2.02	2.93	18.4	253	105	15.8	425	24.8	11.9	1.62	172	5.2	37.7	34.5	6.04	47.6	91.3	10.6	38	7.24	0.94	6	1.07	5.2	0.99	3.06	0.4	2.65	0.38
13	Boluokenu range	06XJ-34	Granitic porphyry	75.32	0.5	13.16	n.a.	n.a.	2.47	0.01	0.33	0.19	2.15	4.49	0.04	1.73	100.39	5.66	61.2	n.a.	4.31	9.02	13.4	180	94	4.6	471	18.2	11.3	0.98	205	5.09	12.6	9.33	4	23.6	46.7	5.48	19.9	3.55	0.79	3.07	0.5	3.09	0.65	1.96	0.3	2.1	0.32
14	Boluokenu range	06XJ-35	Granitic porphyry	72.68	0.49	13.37	n.a.	n.a.	2.82	0	0.2	0.07	2.13	6.42	0.04	1.75	99.97	5.59	45.2	n.a.	3.44	6.27	11.8	226	106	4.65	749	17.6	11.3	1.02	210	5.44	12.6	10.3	3.25	22.9	45	5.23	19.2	3.63	1.57	2.97	0.51	3.16	0.65	1.99	0.3	2.09	0.35
15	Boluokenu range	06XJ-38	Granitic porphyry	74.93	0.5	12.94	n.a.	n.a.	2.66	0.01	0.31	0.19	2.08	4.57	0.04	1.67	99.89	5.67	67.8	n.a.	3.18	5.05	13.8	177	85	4.44	462	17.1	11.4	0.99	197	4.91	9.31	9.76	3.56	22.6	43.7	5.09	17.8	3.32	0.68	2.75	0.47	2.96	0.67	1.89	0.3	2.05	0.33
16	Boluokenu range	06XJ-40	Granitic porphyry	73.28	0.26	13.68	n.a.	n.a.	2.19	0.01	0.1	0.17	4.18	5.04	0.03	1.01	99.95	2.29	14.4	n.a.	2.45	4.96	10.5	159	132	1.93	793	11.8	17.8	1.51	162	3.98	10.4	9.32	3.09	30.3	52.1	5.49	17.3	2.74	0.61	2.11	0.33	1.97	0.41	1.21	0.2	1.41	0.23
17	Boluokenu range	06XJ-41	Granitic porphyry	73.66	0.26	13.83	n.a.	n.a.	2.06	0.02	0.17	0.25	3.4	4.86	0.06	1.17	99.71	2.37	19.6	n.a.	1.78	3.93	11.5	166	155	2.76	866	11.1	18.5	1.54	167	4	10.2	9.64	4	30.2	52.8	5.64	17.7	2.66	0.53	2.02	0.32	1.91	0.41	1.21	0.21	1.37	0.23
18	Boluokenu range	KXX15	Diorite porphyry	55.2	2.08	15.32	n.a.	n.a.	8.22	0.092	4.05	4.84	4.61	1.67	0.17	3.77	100.022	16.5	192	n.a.	27.4	n.a.	n.a.	75.3	233	n.a.	269	22.8	7.63	0.56	258	7.19	8.62	4.06	1.87	13.3	32	4.58	23.3	5.7	1.73	4.77	0.935	4.7	0.763	2.3	0.322	2.11	0.284
19	Boluokenu range	KXX16	Diorite porphyry	56.12	1.14	17.23	n.a.	n.a.	7.54	0.09	3.32	7.23	3.28	1.75	0.22	2.07	99.99	24.7	237	n.a.	22.8	n.a.	n.a.	86.7	397	n.a.	345	40.9	8.47	0.677	82	3.05	8.77	6.51	1.19	20.9	44.9	5.71	24.6	5.9	1.48	5.69	1.21	6.92	1.42	4.53	0.678	4.27	0.63
20	Boluokenu range	KXX25	Diorite porphyry	56.15	2.2	14.47	n.a.	n.a.	9.1	0.1	5.08	4.58	3.6	2.07	0.15	2.51	100.01	15.2	197	n.a.	38.1	n.a.	n.a.	129	383	n.a.	355	24.9	7.91	0.733	279	8.28	4.14	5.72	2.49	23	49.5	6.52	28.4	6.17	1.86	5.34	0.947	5.28	0.803	2.47	0.296	2.41	0.347
21	Boluokenu range	KXX55	Diorite porphyry	55.75	2.07	15.01	n.a.	n.a.	8.34	0.105	4.18	5.84	4.72	1.61	0.167	2.07	99.862	18.1	205	n.a.	28.7	n.a.	n.a.	81	307	n.a.	285	22	9.28	0.642	262	6.31	12.4	3.88	1.36	14.5	35.6	5.46	25.5	5.93	1.76	4.71	0.908	4.64	0.766	2.08	0.323	2.02	0.297
22	Boluokenu range	CN-H1	Granodiorite	78.62	0.08	11.9	0.9	n.a.	2.18	0.02	0.12	0.16	2.45	4.99	0.03	0.44	101.45	2.83	5.11	6.9	0.87	3.53	11.3	219	79.4	3.81	685	22.1	41.5	6.33	229	9.57	18.2	35.3	6.72	24	46	5.21	19.5	3.64	0.57	3.26	0.66	3.87	0.87	2.79	0.53	3.7	0.57
23	Boluokenu range	CN-H3	Granodiorite	78.59	0.08	11.98	0.65	n.a.	1.89	0.01	0.12	0.13	2.94	4.51	0.02	0.42	100.92	2.83	7.36	8.54	0.83	3.56	12.7	209	79.2	3.55	663	21.9	44.5	6.81	222	9.81	14.1	35.3	5.88	28.4	54.6	6.38	22.6	4.29	0.62	3.46	0.68	4.14	0.87	2.68	0.52	3.97	0.62
24	Boluokenu range	HMG14-1	Granodiorite	66.59	0.55	15.37	0.531782	3.01343	3.94	0.08	1.19	2.23	4	3.94	0.15	1.7	n.a.	9	47	n.a.	5.6	<20	17.3	140.3	286.4	5.6	683	30.7	21.7	2.7	252.4	7	8.7	19.9	2.8	54.2	100.9	10.36	35.2	6.44	1.27	5.88	0.92	5.14	1.08	3.08	0.49	3.22	0.48
25	Boluokenu range	HMG14-2	Granodiorite	64.85	0.63	16.05	0.573623	3.25053	4.25	0.07	1.26	2.83	4.15	3.59	0.19	1.9	n.a.	11	45	n.a.	5	<20	18.8	137.8	233.6	6.1	595	33.7	24.6	1.6	297.9	7.5	9.3	15.7	2.7	44.8	92.4	9.6	34.2	6.68	1.25	6.57	1.06	6.18	1.3	3.53	0.6	3.71	0.57
26	Boluokenu range	HMG14-3	Granodiorite	77.01	0.09	12.48	0.101228	0.573623	0.75	0.02	0.07	0.3	3.27	5.33	0.02	0.5	n.a.	4	<8	n.a.	<0.2	<20	14	227.7	27	3.2	249	28.5	25.3	1.8	126.3	4.7	6.9	26.8	4.4	48.3	93.7	9.85	33	5.85	0.36	5.35	0.85	4.95	1.02	3.06	0.45	3.34	0.51
27	Boluokenu range	HMG14-4	Granodiorite	77.07	0.09	12.39	0.0958287	0.543029	0.71	0.01	0.06	0.3	3.25	5.26	0.02	0.7	n.a.	3	<8	n.a.	0.4	<20	13.6	227.7	29.2	3.7	263	29.1	27	2.4	118.7	4.5	7.1	26.3	4.4	45.2	92.7	9.21	29.7	5.85	0.36	5.25	0.87	5.16	1.03	3.14	0.49	3.34	0.49
28	Boluokenu range	HMG14-5	Granodiorite	68.6	0.48	15.09	0.441352	2.50099	3.27	0.07	0.98	1.95	3.7	4.21	0.14	1.3	n.a.	7	32	n.a.	3.8	<20	16.8	142.1	222.7	8.4	781	28.5	20.4	1.8	245.5	6.4	8.9	17.8	2.2	32.4	63	6.71	24.2	4.84	1.14	4.66	0.77	4.48	0.97	2.93	0.43	2.89	0.46
29	Boluokenu range	HMG14-6	Granodiorite	67.55	0.53	15.46	0.492641	2.79163	3.65	0.07	1.11	2.68	3.78	3.82	0.14	1	n.a.	8	45	n.a.	5	<20	17.6	136.1	249.9	4.4	558	27.3	20.4	1.8	250.7	6.3	6.6	16.3	2.5	37.7	74.4	7.97	28.7	5.45	1.14	5.09	0.84	4.78	1	2.94	0.44	2.93	0.45
30	Boluokenu range	HMG14-7	Granodiorite	66.64	0.55	15.7	0.527733	2.99049	3.91	0.09	1.21	3.09	4.08	3.7	0.16	0.7	n.a.	9	45	n.a.	5.2	<20	17.9	134.3	229.7	5.2	518	28.7	21.5	1.4	261.7	6.8	10	31.8	2.8	27.6	54.2	6.35	24.7	5.46	1.16	5.62	0.9	5.36	1.05	3.05	0.51	3.39	0.49
31	Boluokenu range	HMG14-8	Granodiorite	66.46	0.56	15.91	0.515585	2.92165	3.82	0.07	1.22	3.04	4.09	3.47	0.16	1	n.a.	8	46	n.a.	5.5	<20	17.9	116.9	284.4	4.9	537	29.1	21.9	1.8	274.7	6.9	10.8	14.9	2.3	31.9	64.7	6.98	25.4	5.35	1.17	5.31	0.85	4.86	1.01	2.88	0.46	2.99	0.49
32	Boluokenu range	HMG14-9	Granodiorite	66.99	0.52	15.51	0.461597	2.61572	3.42	0.05	1.1	2.98	3.92	3.81	0.14	1.3	n.a.	8	46	n.a.	4.4	<20	17.4	136.7	244	4.5	537	29.7	21.7	1.6	253.4	7	9.6	14.1	2.6	25.1	51.1	5.94	22.9	5.2	1.18	5.3	0.9	5.26	1.08	3.2	0.49	3.43	0.52
33	Boluokenu range	HMG14-10	Granodiorite	67.82	0.49	15.42	0.468346	2.65396	3.47	0.06	1.04	2.89	3.81	3.77	0.15	0.9	n.a.	7	48	n.a.	5	<20	17.1	146	223.3	4.4	538	27.2	20.4	1.6	254.4	6.5	6.2	15.6	2.9	21.7	46.5	5.13	20.1	4.47	1.07	4.64	0.76	4.53	0.89	2.76	0.43	2.75	0.47
34	Boluokenu range	DMZ14-1	Granodiorite	72.67	0.3	13.75	0.380615	2.15682	2.82	0.06	0.46	0.82	5.17	2.59	0.11	1.1	n.a.	9	16	n.a.	2.3	<20	13.6	60.5	146.8	1.1	564	25.8	7.2	0.7	175.1	4.6	0.6	5.3	1.2	18.6	36.6	4.13	16.3	3.77	0.96	3.99	0.68	4.51	0.94	2.78	0.43	3.1	0.5
35	Boluokenu range	DMZ14-2	Granodiorite porphyry	71.78	0.32	13.99	0.354971	2.0115	2.63	0.08	0.64	1.44	4.87	2.7	0.1	1.3	n.a.	10	19	n.a.	1.6	<20	13.8	55	221.9	2.3	731	27.8	6.9	0.7	183	4.8	0.5	4.9	1.1	22.7	46.2	5.28	21.2	4.32	1.02	4.42	0.75	4.51	0.97	3.18	0.47	3.09	0.47
36	Boluokenu range	DMZ14-3	Granodiorite porphyry	71.73	0.32	13.75	0.329327	1.86619	2.44	0.08	0.57	2.16	5.27	1.83	0.12	1.6	n.a.	10	19	n.a.	1.9	<20	12.9	38.7	205.8	0.6	410	27.2	6.9	0.5	179.5	4.6	0.7	5.6	1	23	40.9	4.77	18.6	4.36	0.91	4.31	0.69	4.34	0.95	3.01	0.48	3.2	0.54
37	Boluokenu range	DMZ14-4	Granodiorite porphyry	71.47	0.35	13.73	0.430554	2.43981	3.19	0.07	0.54	1.14	5.46	2.21	0.11	1.6	n.a.	10	23	n.a.	2.4	<20	12.6	48	129.8	0.8	465	26	7.2	0.6	168.7	4.1	0.5	4.2	0.6	23.8	47	5.3	21	4.29	0.85	4.23	0.71	4.39	0.89	2.89	0.44	2.87	0.48
38	Boluokenu range	DMZ14-5	Granodiorite porphyry	72.35	0.32	13.9	0.367118	2.08034	2.72	0.07	0.52	1.26	5.34	2.36	0.11	0.9	n.a.	10	26	n.a.	2.3	<20	13.1	49.2	158.4	0.9	475	28.1	7	0.4	165.9	4.5	0.6	5.4	1.1	25.2	49.6	5.35	20.9	4.32	0.95	4.51	0.79	4.86	1.02	3.04	0.46	3.33	0.53
39	Boluokenu range	DMZ14-6	Granodiorite porphyry	71.34	0.32	13.92	0.373867	2.11858	2.77	0.08	0.61	1.81	4.98	2.33	0.1	1.6	n.a.	10	16	n.a.	2.5	<20	14	54.1	198.1	0.8	506	24.7	6.2	0.5	167.7	4.6	0.7	4.4	1	20.6	42.5	4.87	19.5	3.97	1.04	4.06	0.7	4.42	0.91	2.82	0.41	2.92	0.49
40	Boluokenu range	DMZ14-7	Granodiorite porphyry	71.47	0.32	13.7	0.363069	2.05739	2.69	0.07	0.49	1.96	5.51	1.95	0.11	1.6	n.a.	10	17	n.a.	2.1	<20	12.5	39.8	189.5	1	432	27.7	7.1	0.8	173.4	4.7	0.6	4.8	0.9	23.7	46.5	5.21	19.9	4.19	0.99	4.49	0.77	4.61	0.97	3.07	0.46	3.24	0.53
41	Boluokenu range	DMZ14-8	Granodiorite porphyry	72.64	0.31	13.54	0.291535	1.65203	2.16	0.07	0.5	1.89	5.67	1.52	0.1	1.4	n.a.	10	18	n.a.	2	<20	11.7	30.9	202.5	0.6	375	24.3	5.9	0.5	152.8	4.2	0.8	4.5	1.1	20.6	42.7	4.85	18.5	4.28	1	3.9	0.67	4.04	0.89	2.64	0.41	2.95	0.48
42	Boluokenu range	DMZ14-9	Granodiorite porphyry	72.11	0.31	13.89	0.36037	2.0421	2.67	0.06	0.53	1.29	5.57	2.06	0.1	1.2	n.a.	9	17	n.a.	2.4	<20	12.9	43.2	183.1	1.3	463	25.7	6.4	0.5	163	4.1	0.3	4.5	0.9	21	41.8	4.87	18.1	3.93	0.93	4.11	0.69	4.43	0.9	2.82	0.44	2.96	0.5
43	Boluokenu range	DMZ14-10	Granodiorite porphyry	72.22	0.3	13.15	0.419757	2.37862	3.11	0.07	0.53	1.52	4.92	2.44	0.11	1.5	n.a.	9	13	n.a.	2.2	<20	12	51	141.3	0.8	501	23.5	6.5	0.4	164.3	4.4	0.6	4.8	1	20.6	42.2	4.69	17.3	3.71	0.74	3.79	0.64	3.88	0.82	2.54	0.38	2.73	0.45
44	Boluokenu range	QA-11-1	Andesite	59.69	0.588	16.08	3.74	n.a.	5.56	0.078	3.55	2.84	5.48	1.7	0.146	4.26	99.452	n.a.	n.a.	185	n.a.	68.6	n.a.	48.3	312	2.53	581	36.4	14.6	1.15	181	5.19	11.7	12.1	2.77	37.3	75.6	8.95	35	6.94	1.59	6.09	1.21	6.35	1.34	3.88	0.632	4.22	0.578
45	Boluokenu range	QA-11-2	Andesite	60.1	0.596	15.97	4.78	n.a.	5.86	0.086	3.61	2.52	5.42	1.6	0.143	4.06	100.685	n.a.	n.a.	195	n.a.	70.4	n.a.	46.2	319	2.84	549	36.3	14.1	1.12	183	5.13	12	11.8	2.66	41.1	79	9.35	36.2	7.11	1.67	6.35	1.22	6.38	1.3	3.75	0.621	4.16	0.563
46	Boluokenu range	QA-11-3	Andesite	58.3	0.623	16.45	4.65	n.a.	5.89	0.085	3.84	2.99	5.67	1.51	0.149	4.44	100.157	n.a.	n.a.	181	n.a.	69.2	n.a.	42.9	316	2.04	528	37.4	14.5	1.14	188	5.31	12.1	12.1	2.9	36.5	71.1	8.51	33.7	6.73	1.6	5.95	1.17	6.37	1.33	4.03	0.668	4.47	0.613
47	Boluokenu range	QA-19	Andesite	54.41	0.889	17.99	3.28	n.a.	8.05	0.131	4.19	7.91	3.08	1.01	0.133	2.11	101.073	n.a.	n.a.	17.3	n.a.	7.43	n.a.	35.4	306	1.67	210	24	4.54	0.384	114	3.01	8.55	3.41	1.03	13.6	28.3	3.67	15.4	3.59	1.15	3.37	0.728	4.14	0.877	2.58	0.417	2.81	0.392
48	Boluokenu range	QA-23-1	Andesite	53.28	0.907	18.22	3.86	n.a.	7.19	0.136	2.38	8.61	3.43	1.24	0.226	4.37	99.479	n.a.	n.a.	8.83	n.a.	6.38	n.a.	35.4	458	2.88	335	23.7	12.8	0.793	195	4.56	8.41	4.21	1.15	21.2	41.3	5.15	21.3	4.51	1.47	4.01	0.795	4.2	0.86	2.51	0.397	2.62	0.38
49	Boluokenu range	QA-23-2	Andesite	54.55	0.915	18.27	4.34	n.a.	7.25	0.11	2.5	7.5	3.4	1.28	0.221	3.91	100.336	n.a.	n.a.	8.72	n.a.	6.09	n.a.	36.4	433	4.27	332	22.2	12.9	0.827	198	4.59	8.02	4.41	1.2	21	41.5	5.19	20.8	4.42	1.44	3.9	0.784	4.06	0.82	2.42	0.393	2.61	0.362
50	Boluokenu range	QA-26-1	Andesite	54.24	0.909	18.17	4.82	n.a.	8.12	0.12	3.95	4.39	4.9	0.663	0.219	4.28	100.501	n.a.	n.a.	8.78	n.a.	5.8	n.a.	20.4	402	7.05	163	22.7	11.9	0.716	185	4.08	8.01	3.72	1.08	18.2	36.9	4.7	19.1	4.06	1.33	3.57	0.735	3.87	0.807	2.29	0.365	2.45	0.336
51	Boluokenu range	QA-26-2	Andesite	52.33	0.896	17.97	5.37	n.a.	9.58	0.14	4.01	4.74	4.91	0.588	0.216	4.58	100.75	n.a.	n.a.	6.87	n.a.	6.61	n.a.	19.9	360	7.18	156	24.6	12.2	0.721	193	4.24	7.42	3.91	1.11	19	37.6	4.8	20.1	4.26	1.36	3.76	0.772	4.06	0.839	2.43	0.381	2.52	0.357
52	Boluokenu range	QA-32-1	Andesite	55.03	0.844	16.92	1.32	n.a.	8.16	0.102	3.52	3.76	5.96	1.25	0.179	4.23	97.045	n.a.	n.a.	65	n.a.	19.2	n.a.	32.4	560	3.23	595	23	6.2	0.476	134	3.45	9.17	3.75	1.06	15	32	4.14	17.1	3.99	1.24	3.57	0.786	4.22	0.828	2.43	0.402	2.51	0.362
53	Boluokenu range	QA-32-2	Andesite	51.95	0.767	15.74	0.65	n.a.	7.04	0.114	4.14	6.71	4.85	0.341	0.159	7.89	92.461	n.a.	n.a.	71.4	n.a.	20	n.a.	13	384	3.77	77.9	21.6	5.63	0.432	122	3.08	7.87	3.36	0.968	17.3	35.1	4.76	19.8	4.2	1.24	3.58	0.684	3.54	0.737	2.14	0.342	2.39	0.332
54	Boluokenu range	QA-32-3	Andesite	54.94	0.793	16.38	0.79	n.a.	7.2	0.105	3.95	4.6	5.37	0.628	0.169	5.85	94.925	n.a.	n.a.	69.2	n.a.	20.4	n.a.	18.9	472	4.36	266	23.2	6.07	0.457	132	3.27	8.49	3.62	0.975	16.8	34	4.4	17.9	3.76	1.12	3.3	0.703	3.7	0.799	2.28	0.38	2.46	0.359
55	Boluokenu range	QA-32-4	Andesite	54.5	0.759	16.03	0.49	n.a.	6.15	0.105	4.92	5.06	4.85	0.473	0.157	6.97	93.494	n.a.	n.a.	61.4	n.a.	19.7	n.a.	12.9	438	3.09	671	21.7	6.56	0.496	127	3.15	6.55	4.08	0.866	16.2	34.2	4.44	19	4.05	1.1	3.64	0.696	3.61	0.736	2.18	0.37	2.35	0.328
56	Boluokenu range	HJ-6	Dacite	60.84	0.61	16.27	1.31	n.a.	4.58	0.128	2.26	3.44	6.17	1.45	0.262	3.96	97.32	n.a.	n.a.	9.82	n.a.	8.57	n.a.	51.3	767	5.86	363	20.4	15.3	1.07	142	3.46	21.5	3.34	1.21	24.3	47.6	5.99	24.2	4.72	1.48	3.98	0.71	3.53	0.678	2	0.305	2.05	0.297
57	Boluokenu range	HJ-7	Dacite	62.54	0.579	16.23	1.15	n.a.	4.86	0.098	1.8	2.63	6.58	1.2	0.253	3.2	97.92	n.a.	n.a.	8.46	n.a.	8.23	n.a.	46.3	581	4.45	219	17.6	15	1.06	138	3.39	24.3	3.47	1.16	21.5	43.4	5.41	21.7	4.22	1.26	3.46	0.626	3.18	0.607	1.76	0.289	1.86	0.264
58	Boluokenu range	HJ-8	Dacite	62.69	0.58	15.92	1.04	n.a.	4.93	0.098	1.58	2.97	6.62	1.08	0.248	3.24	97.756	n.a.	n.a.	9.27	n.a.	8.31	n.a.	39.5	729	5.03	246	18.2	14.8	1.05	138	3.38	26.1	3.35	1.09	22.5	43.6	5.4	21.9	4.17	1.29	3.53	0.658	3.22	0.63	1.8	0.283	1.83	0.266
59	Boluokenu range	HJ-9	Dacite	62.57	0.589	15.9	1.04	n.a.	4.71	0.105	1.73	2.89	6.05	1.76	0.244	3.43	97.588	n.a.	n.a.	8.75	n.a.	8.35	n.a.	54.1	570	4.57	406	16.7	14.1	0.991	128	3.16	29	3.23	1.09	20.2	40.5	4.93	19.7	3.7	1.15	3.22	0.58	3.07	0.574	1.69	0.265	1.71	0.249
60	Boluokenu range	HJ-14	Dacite	63.23	0.611	16.56	1.77	n.a.	4.4	0.092	1.13	2.14	4.98	3.53	0.27	2.99	98.713	n.a.	n.a.	10.3	n.a.	7.81	n.a.	112	521	5.84	638	16.9	17.1	1.18	119	2.96	17.5	3.93	1.14	23.6	45.7	5.6	22	4.19	1.15	3.49	0.609	2.99	0.592	1.66	0.265	1.69	0.231
61	Boluokenu range	HJ-15	Dacite	62.37	0.602	16.65	1.25	n.a.	4.26	0.109	0.791	2.98	5.33	3.1	0.268	3.46	97.71	n.a.	n.a.	10.1	n.a.	9.47	n.a.	96.8	619	5.7	755	18.4	17.3	1.17	115	2.96	12.7	3.71	1.34	24.2	48	5.83	23.5	4.4	1.24	3.66	0.653	3.25	0.623	1.82	0.278	1.76	0.257
62	Boluokenu range	HJ-16	Dacite	62.93	0.609	16.48	1.34	n.a.	4.92	0.088	0.852	2.24	5.29	3.67	0.267	2.62	98.686	n.a.	n.a.	10.2	n.a.	10.3	n.a.	100	372	4.95	793	15.7	17	1.14	104	2.73	16.9	3.68	1.1	23.7	46.7	5.68	22.2	4.1	1.05	3.42	0.583	2.89	0.551	1.58	0.249	1.63	0.228
63	Boluokenu range	HJ-17	Dacite	63.38	0.594	16.42	1.52	n.a.	4.15	0.082	1.19	2.55	5.63	2.98	0.261	2.7	98.757	n.a.	n.a.	12.3	n.a.	8.59	n.a.	85.6	491	2.83	743	18.6	18.9	1.32	112	2.83	11	3.8	1.17	26.1	50.4	6.12	23.9	4.57	1.36	3.91	0.682	3.29	0.62	1.73	0.254	1.71	0.246
64	Boluokenu range	HJ-32	Dacite	72.46	0.45	14.32	1.19	n.a.	2.08	0.025	0.362	0.303	4.56	4.18	0.085	1.16	100.015	n.a.	n.a.	2.75	n.a.	1.38	n.a.	115	118	1.87	792	36.8	12.6	0.901	258	6.15	14.8	10	2.79	30.3	62.3	7.78	31	6.27	1.43	5.32	1.04	5.91	1.25	3.76	0.641	4.15	0.625
65	Boluokenu range	HJ-33	Dacite	73.46	0.403	13.56	1.01	n.a.	2.3	0.028	0.367	0.33	4.28	3.95	0.072	1.15	99.76	n.a.	n.a.	2.19	n.a.	0.881	n.a.	109	115	1.83	789	36.2	11.9	0.845	253	6.02	13.5	9.71	2.68	30.2	61.9	7.81	30.8	6.28	1.43	5.23	1.03	5.67	1.22	3.72	0.61	4.07	0.606
66	Boluokenu range	HJ-34	Dacite	76.09	0.379	12.34	0.97	n.a.	1.87	0.036	0.239	0.383	3.94	3.7	0.073	0.93	100.02	n.a.	n.a.	2.31	n.a.	0.919	n.a.	102	117	1.77	780	34.3	11.2	0.796	238	5.71	18.2	9.31	2.47	42.9	78.9	9.42	36.6	7.04	1.56	6.14	1.11	5.89	1.2	3.56	0.582	3.91	0.573
67	Boluokenu range	HJ-35	Dacite	69.38	0.427	13.65	1.97	n.a.	2.28	0.051	0.295	2.9	4.79	3.2	0.077	2.91	99.02	n.a.	n.a.	2.44	n.a.	1.44	n.a.	78.7	126	1.46	577	38.5	11.9	0.852	255	6.08	18.4	9.69	2.56	38	74	9.06	35.9	7.14	1.66	6.03	1.16	6.31	1.27	3.87	0.65	4.27	0.614
68	Boluokenu range	NK-56	Dacite	63.67	0.34	16.61	1.3	n.a.	2.49	0.078	0.645	3.88	3.48	3.11	0.097	5.55	95.7	n.a.	n.a.	11.8	n.a.	7.53	n.a.	95.1	282	4.63	595	11.9	15.1	1	65	1.75	5.68	5.07	1.28	21.8	37.5	4.11	14.4	2.63	0.749	2.19	0.382	1.91	0.376	1.16	0.189	1.28	0.189
69	Boluokenu range	NK-57	Dacite	64.91	0.337	16.4	1.05	n.a.	2.34	0.071	0.541	3.54	3.51	3.05	0.1	5.13	95.849	n.a.	n.a.	11.8	n.a.	6.96	n.a.	89.6	254	4.39	604	10.9	14.2	0.93	61.7	1.62	4.41	4.85	1.3	21.5	36.6	4.02	14.2	2.47	0.728	2.08	0.353	1.81	0.353	1.06	0.172	1.17	0.161
70	Boluokenu range	NK-58	Dacite	62.59	0.315	15.66	1.43	n.a.	3	0.096	0.599	5.04	3.37	2.85	0.096	6.35	95.046	n.a.	n.a.	11.9	n.a.	9.5	n.a.	89.5	296	4.58	592	12	14.1	0.93	59.4	1.61	6.02	4.89	1.37	21.5	37.3	4.09	14.7	2.76	0.851	2.4	0.397	2.09	0.392	1.16	0.187	1.22	0.18
71	Boluokenu range	NK-59	Dacite	64.64	0.327	16.28	1.06	n.a.	2.49	0.069	0.537	3.76	3.5	3.03	0.096	5.2	95.789	n.a.	n.a.	11.8	n.a.	7.72	n.a.	90.2	266	4.46	602	11.3	14.3	0.937	59.7	1.59	4.94	4.82	1.31	21.8	37.6	4.16	15	2.56	0.782	2.17	0.368	1.95	0.37	1.1	0.178	1.18	0.162
72	Boluokenu range	NK-60	Dacite	65.01	0.358	17.08	0.97	n.a.	2.37	0.076	0.544	2.98	3.71	3.26	0.104	4.45	96.462	n.a.	n.a.	14.2	n.a.	6.92	n.a.	103	280	4.32	745	12.5	16.9	1.1	70.2	1.93	6.18	5.56	1.67	24.1	41.8	4.59	16.5	2.83	0.827	2.53	0.402	2.12	0.41	1.23	0.199	1.34	0.19
73	Boluokenu range	06XJ-30	Andesite	63.85	0.48	15.9	n.a.	n.a.	3.77	0.05	2.51	0.7	2.04	5.92	0.08	3.99	99.29	8.23	75.9	n.a.	11.4	35.9	17.6	231	235	8.81	368	9.86	5.83	0.471	149	3.66	6.36	4.96	1.5	13.6	27.4	3.19	11.5	2.18	0.601	1.86	0.3	1.7	0.366	1.07	0.167	1.12	0.175
74	Boluokenu range	06XJ-31	Andesite	62.02	0.67	16.01	n.a.	n.a.	5.03	3.79	3.79	0.98	4.87	2.17	0.08	3.75	103.16	10.9	72.4	n.a.	16.2	37.1	18.7	86.1	354	5.72	345	12.2	6.92	0.559	176	4.19	7.45	4.76	1.36	12.7	28.1	3.42	12.8	2.71	0.736	2.34	0.368	2.06	0.445	1.25	0.183	1.24	0.199
75	Boluokenu range	06XJ-32	Andesite	58.94	0.81	15.39	n.a.	n.a.	5.91	6.59	6.59	2.51	4.63	6.23	0.11	3.72	111.43	17	94.7	n.a.	22.9	126	16.8	53.6	686	8.11	299	14.3	9.07	0.705	159	3.61	8.2	4.75	1.13	13.4	27.6	3.33	12.6	2.74	0.884	2.56	0.428	2.54	0.513	1.49	0.207	1.53	0.222
76	Boluokenu range	06XJ-33	Andesite	61.32	0.77	16.65	n.a.	n.a.	5.28	3.75	3.75	2.18	1.64	1.04	0.1	3.03	99.51	10.8	76.4	n.a.	18.6	54.5	17.5	27.7	697	9.06	371	14.8	9.53	0.746	168	3.87	6.08	5.36	1.57	14.1	29	3.48	13.2	2.76	0.878	2.66	0.425	2.59	0.537	1.55	0.228	1.59	0.232
80	Awulale range	10CG26-1	Granodiorite	66.96	0.41	14.547	n.a.	n.a.	4.49	0.12	2.26	1.89	3.87	3.04	0.07	1.69762	99.3546	13.03	85.206	9.9309	9.2796	6.5274	12.5097	92.32	160.62	1.18558	493.4	20.58	7.3602	0.81685	136.22	4.36986	6.1536	18.6318	3.1438	19.446	40.14	4.486	17.276	3.762	0.7205	3.938	0.64701	4.074	0.8582	2.69	0.44528	2.9589	0.46851
81	Awulale range	10CG26-3	Granodiorite	71.86	0.29	13.79	n.a.	n.a.	2.6	0.05	1.39	0.78	4.25	3.84	0.05	1.13954	100.04	6.948	42.702	6.4134	4.4022	4.4616	10.1997	102.08	58.64	0.28974	494.4	14.824	7.425	0.9163	136.32	4.33026	3.3216	22.924	4.3428	20.72	38.6	3.96	14.132	2.756	0.43032	2.776	0.45297	2.842	0.5958	1.9206	0.3267	2.2407	0.36183
82	Awulale range	10CG26-6	Granodiorite	68.28	0.38	14.61	n.a.	n.a.	4.13	0.08	1.71	1.87	4.1	3.27	0.07	1.41886	99.9189	11.2855	68.5303	7.5841	6.78865	4.55315	11.8837	81.4727	142.744	0.48484	452.065	18.8919	6.88391	0.949489	134.086	4.23369	7.19268	19.9553	4.28897	20.9686	40.3024	4.33498	16.2744	3.43489	0.680419	3.57818	0.591641	3.73156	0.77618	2.43792	0.407363	2.72299	0.433771
108	Awulale range	S-5	Trachy andesite	55.36	0.64	16.33	n.a.	n.a.	9.21	0.21	3.01	4.28	4.88	2.98	0.16	3.03	100.09	n.a.	n.a.	n.a.	n.a.	n.a.	n.a.	16.67	299	0.76	238.8	11.23	3.86	0.32	102.9	2.82	n.a.	2.15	0.75	8.54	15.68	2.47	10.56	2.74	1.22	3.43	0.7	3.56	0.89	2.28	0.34	2.01	0.34
109	Awulale range	S-7	Trachy andesite	56.28	0.72	16.63	n.a.	n.a.	11.15	0.14	2.23	4.31	4.31	2.23	0.21	2.08	100.29	n.a.	n.a.	n.a.	n.a.	n.a.	n.a.	33.91	58.62	1.37	151.4	58.78	6.43	0.55	140	4.15	n.a.	6.7	2.92	11.9	21.45	2.66	10.18	2.75	0.87	4.59	1.15	6.73	1.58	3.84	0.55	2.99	0.46
110	Awulale range	S-8	Trachy andesite	61.34	0.71	15.47	n.a.	n.a.	7.62	0.14	2.45	4.21	2.9	5	0.17	0.69	100.7	n.a.	n.a.	n.a.	n.a.	n.a.	n.a.	114.68	284.81	1.37	563.36	68.56	10.71	0.92	259.91	7.43	n.a.	9.29	2.84	25.34	57.31	7.38	31.6	7.5	2.13	8.06	1.27	8.03	1.67	4.95	0.76	4.86	0.79
111	Awulale range	S-9	Dacite	62.1	0.64	16.77	n.a.	n.a.	7.73	0.12	2.38	2.69	3.27	1.38	0.12	2.78	99.98	n.a.	n.a.	n.a.	n.a.	n.a.	n.a.	58.43	361.1	6.19	317.6	34.56	7.16	0.64	155.4	4.47	n.a.	6.53	2.54	14.32	30.32	3.23	11.49	2.34	0.7	2.73	0.58	2.93	0.73	1.89	0.31	1.75	0.31
112	Awulale range	S-10	Dacite	65.94	1.07	14.97	n.a.	n.a.	5.39	0.16	1.45	1.37	5.08	4.3	0.26	0.41	100.4	n.a.	n.a.	n.a.	n.a.	n.a.	n.a.	10.97	59.89	0.41	31.46	21.57	6.66	0.49	153.94	4.06	n.a.	2.23	0.83	13.45	29.64	3.73	15.82	3.62	1.01	4.16	0.67	4.27	0.93	2.88	0.42	2.76	0.45
113	Awulale range	S-11	Dacite	64	0.92	15.19	n.a.	n.a.	3.29	0.12	2.09	3.48	6.87	0.17	0.03	3.13	99.29	n.a.	n.a.	n.a.	n.a.	n.a.	n.a.	2.90194	80.1133	0.248411	35.8736	38.47	8.73653	0.580359	146.855	3.583	n.a.	5.04657	2.66507	11.1622	30.3604	3.68518	16.5627	4.70458	1.00626	5.58183	1.01564	6.51149	1.32621	3.60076	0.516215	3.27856	0.433718
114	Awulale range	S-12	Dacite	61.22	0.82	16.13	n.a.	n.a.	7.72	0.06	1.38	2.85	4.26	1.39	0.31	3.36	99.5	n.a.	n.a.	n.a.	n.a.	n.a.	n.a.	48.41	67.35	1.29	272.2	28.36	3.72	0.31	93.54	2.3	n.a.	3.76	0.74	12.11	26.86	3.69	14.86	3.51	0.95	3.85	0.75	3.93	0.99	2.59	0.42	2.52	0.44
115	Awulale range	S-13	Dacite	62.06	0.56	16.71	n.a.	n.a.	4.91	0.08	1.88	2.86	5.48	1.82	0.095	3.08	99.535	n.a.	n.a.	n.a.	n.a.	n.a.	n.a.	50.78	221.6	2.85	324.8	39.88	5.29	0.48	117.9	3.42	n.a.	6.62	1.91	21.4	39.65	5.22	19.8	4.26	1.05	4.45	0.84	4.33	1.09	2.94	0.46	2.75	0.48
116	Awulale range	S-14	Dacite	62.1	0.64	16.77	n.a.	n.a.	7.73	0.12	2.38	2.69	3.27	1.38	0.12	2.67	99.87	n.a.	n.a.	n.a.	n.a.	n.a.	n.a.	58.43	361.1	6.19	317.6	42.89	7.16	0.64	155.4	4.47	n.a.	6.53	2.54	14.32	30.32	3.23	11.49	2.34	0.7	2.73	0.58	2.93	0.73	1.89	0.31	1.75	0.31
117	Awulale range	S-15	Dacite	63.33	0.53	16.41	n.a.	n.a.	5.33	0.14	2.59	2.18	3.82	2.63	0.052	2.88	99.892	n.a.	n.a.	n.a.	n.a.	n.a.	n.a.	5.89	536.7	4.65	225.1	37.87	6.18	0.48	112.9	3.51	n.a.	2.89	1.05	15.31	33.7	4.7	19.19	4.47	1.33	4.49	0.9	4.49	1.12	2.86	0.44	2.53	0.44
118	Awulale range	S-16	Dacite	67.06	0.49	14.98	n.a.	n.a.	5.02	0.1	1.98	2.89	1.58	2.33	0.056	3.05	99.536	n.a.	n.a.	n.a.	n.a.	n.a.	n.a.	34.1	100.4	1.1	217.7	57.57	8.67	0.72	178.6	5.16	n.a.	7.36	2.61	18.82	45.87	4.8	17.97	3.83	0.86	3.68	0.66	3.07	0.81	2.13	0.34	2.07	0.36
130	Awulale range	H-III-1	Andesite	52.73	0.99	17.02	n.a.	n.a.	9.75	0.28	4.81	4.43	6.67	0.48	0.17	3.01778	100.348	n.a.	n.a.	n.a.	n.a.	n.a.	n.a.	1.53733	378.021	4.04509	146.433	13.7932	4.80827	0.425247	101.781	3.23447	n.a.	2.19437	1.81128	8.49101	21.0443	2.90759	12.853	3.21485	1.01261	3.71695	0.6517	3.92194	0.874544	2.37853	0.333577	2.15581	0.331756
131	Awulale range	H-NX-4	Andesite	59.37	1.11	17.13	n.a.	n.a.	8.19	0.16	1.4	1.97	7.15	0.87	0.26	2.44	100.05	n.a.	n.a.	n.a.	n.a.	n.a.	n.a.	60.7621	231.27	2.40314	172.615	21.751	6.99058	0.485893	150.205	3.7545	n.a.	3.59272	1.62614	7.01455	18.96	2.50729	13.131	3.57841	1.07382	4.30585	0.667574	4.31551	0.903215	2.69	0.41	2.36	0.389631
132	Awulale range	H-NX-5	Trachy andesite	48.49	1	20.53	n.a.	n.a.	10.5	0.52	5.07	1.9	5.07	2.03	0.2	4.86069	100.171	n.a.	n.a.	n.a.	n.a.	n.a.	n.a.	134.114	294.528	4.4955	2164.35	21.2295	6.01623	0.40209	118.13	2.90435	n.a.	4.7107	1.54134	12.6848	30.3036	3.57235	17.0301	4.0096	1.57586	4.61885	0.702623	4.36929	0.887579	2.56	0.39	2.14	0.351371
135	Awulale range	TS207	Trachyandesite	59.58	0.75	16.58	n.a.	n.a.	7.12349	0.23	3.09	1.71	4.1	4.72	0.12	2.07	99.98	n.a.	n.a.	n.a.	n.a.	n.a.	n.a.	164.3	679.7	4.88	814	20.36	10.84	0.94	141.4	4.25	n.a.	7.77	3.37	30.89	50.24	6.91	26.14	5.95	1.86	5.69	0.91	5.55	1.03	2.93	0.48	3.07	0.48
136	Awulale range	TS194	Trachyandesite	58.41	1.01	15.02	n.a.	n.a.	9.98655	0.18	1.56	5.01	2.98	2.89	0.43	2.51	99.4	n.a.	n.a.	n.a.	n.a.	n.a.	n.a.	151.6	235.3	3.35	501.7	24.31	11.52	0.59	300.6	8.23	n.a.	13.06	2.52	26.89	58.39	6.47	24.26	6.11	1.18	5.16	1.03	6.97	1.51	4.57	0.76	5.16	0.79
137	Awulale range	TS197b	Trachyte	65.12	0.59	15.02	n.a.	n.a.	5.20568	0.09	1.11	1.21	5.22	4.82	0.32	1.72	100.35	n.a.	n.a.	n.a.	n.a.	n.a.	n.a.	248.6	148.7	7.56	337.9	22.87	7.8	0.88	231.8	5.97	n.a.	10.11	3.39	14.05	33.87	4.27	16.73	4.24	1.08	4.09	0.71	4.06	0.79	2.22	0.32	1.97	0.31
138	Awulale range	TS197N	Trachyte	61.24	0.62	14.12	n.a.	n.a.	8.55063	0.16	2.39	1.97	4.72	4.78	0.21	1.64	100.03	n.a.	n.a.	n.a.	n.a.	n.a.	n.a.	12.23	205	0.99	59.81	21.8	4.03	0.26	104.9	2.71	n.a.	0.7	1.52	7.98	20.64	3.07	13.94	3.92	1.25	3.97	0.65	4.05	0.81	2.21	0.34	2.17	0.31
139	Awulale range	TS191	Rhyolite	74.4	0.2	12.19	n.a.	n.a.	2.36784	0.04	0.04	0.4	2.08	7.9	0.02	0.51	100.11	n.a.	n.a.	n.a.	n.a.	n.a.	n.a.	261.4	222.9	3.16	1011	26.18	11.31	1.29	369.1	8.01	n.a.	13.29	3.73	30.95	78.01	9.73	37.4	9.12	2.01	7.65	1.42	9.37	1.98	5.66	0.88	5.51	0.87
140	Awulale range	10CG06-2	Rhyolite	68.02	0.74	13.74	n.a.	n.a.	4.77	0.05	1.88	0.42	3.3	5.41	0.17	1.45825	99.9583	n.a.	32.6327	2.70104	5.23465	2.86095	12.9206	108.81	59.2916	0.811795	790.216	32.6937	12.333	0.817368	264.557	7.41881	5.3716	10.5945	2.55698	16.6821	43.6661	5.77067	25.4194	5.92713	0.951043	5.90681	0.999129	6.57125	1.44348	4.67343	0.798385	5.32527	0.861303
141	Awulale range	10CG11-1	Andesite	53.61	0.7	16.81	n.a.	n.a.	10.61	0.14	5.21	0.93	5.7	3.11	0.09	2.57639	99.4864	n.a.	81.884	34.083	24.222	22.044	15.1998	64.56	68.64	0.41712	791.8	15.956	2.7216	0.198602	55.04	1.75072	9.2928	1.61392	0.81048	9.94	17.86	2.25	10.444	2.804	0.98076	3.294	0.55713	3.528	0.7326	2.194	0.34364	2.184	0.33852
142	Awulale range	10CG11-2	Andesite	52.43	0.69	16.5	n.a.	n.a.	10.6	0.16	5.42	1.91	5.58	2.81	0.1	3.4159	99.6159	n.a.	93.258	40.656	26.642	27.148	16.191	59.2	61.6	0.35838	651.6	15.52	2.7882	0.283687	55.56	1.76141	8.6016	1.65396	1.0054	14.154	25.06	2.984	12.838	2.846	0.93302	3.294	0.53277	3.384	0.705	2.142	0.3388	2.1462	0.33663
143	Awulale range	10CG17-1	Andesite	60.47	0.67	16.51	n.a.	n.a.	6.08	0.08	4.06	0.83	5.89	2.64	0.15	2.11831	99.4983	n.a.	126.06	30.576	4.9214	21.5974	16.7034	66.12	95.52	0.74954	482.8	29.88	7.596	0.53295	136.86	3.99564	2.35344	6.9916	1.41086	7.314	19.016	2.814	13.744	4.226	0.96272	5.136	0.92757	6.096	1.2758	3.876	0.60588	3.8199	0.57183
144	Awulale range	10CG17-2	Andesite	52.19	1.14	17.14	n.a.	n.a.	8.74	0.14	7.76	1.19	5.87	2.89	0.24	2.19736	99.4974	n.a.	283.8	51.114	13.255	48.488	16.9722	236.6	93.44	14.1372	132.24	55.82	5.5998	0.566525	119.1	3.72834	3.984	4.1426	1.45288	1.9448	7.916	2.142	15.682	7.866	2.0097	10.214	1.8438	11.886	2.418	6.862	1.0175	6.0207	0.83664
145	Awulale range	10CG21-1	Rhyolite	71.72	0.21	12.58	n.a.	n.a.	2.94	0.09	0.6	2.92	3.98	4	0.03	0.599161	99.6692	n.a.	7.4118	2.07711	4.4044	3.5464	7.8288	75.7	36.54	0.33132	428.6	19.18	8.0838	0.640475	176.46	5.49648	2.8488	11.4136	2.7962	7.644	16.858	2.136	9.184	2.312	0.12859	2.788	0.52794	3.634	0.815	2.706	0.48224	3.3033	0.53634
146	Awulale range	10CG21-2	Rhyolite	72.37	0.25	13.49	n.a.	n.a.	1.25	0.03	0.26	0.71	1.29	9.53	0.03	0.439824	99.6498	n.a.	16.5066	9.5739	0.8712	9.2312	7.5705	208.4	49.86	0.96448	1240	15.224	9.5688	0.7429	210.6	6.55974	2.4936	13.4794	2.8182	4.61	10.926	1.3964	6.002	1.46	0.187154	1.6828	0.33474	2.476	0.6358	2.422	0.4653	3.3768	0.58212
147	Awulale range	10CG25-4	Rhyolite	61.94	0.79	14.81	n.a.	n.a.	8.62	0.11	2.71	1.12	4.54	3.15	0.1	1.75789	99.6479	n.a.	163.042	12.5139	11.9482	7.1764	15.1473	70.86	97.94	0.6182	751.2	28	5.3136	0.373872	116.08	3.4848	5.1816	4.2218	1.39216	89.42	21.66	26.94	10.55	16.278	3.6366	10.44	1.24929	6.364	1.2596	3.882	0.61028	3.9585	0.6321
148	Awulale range	12ZB57	Rhyolite	75.9	0.26	12.14	n.a.	n.a.	1.9945	0.02	0.09	0.87	4.41	3.86	0.05	0.37	99.9645	n.a.	17.8	4.97	0.83	1.49	9.76	72	34.2	0.49	527	9.02	5.37	0.39	123	3.63	2.21	4.14	0.93	6.56	17.5	1.82	7.31	1.48	0.23	1.3	0.25	1.84	0.4	1.24	0.22	1.57	0.26
149	Awulale range	Zb382	Rhyolite	68.3	0.38	15.8	n.a.	n.a.	2.91155	0.04	1.25	4.16	4.36	1.29	0.11	0.8	99.4016	n.a.	50	18.3	7.42	9.56	17.9	36.1	424	0.6	224	7.25	3.64	0.31	131	3.63	5.83	2.51	0.9	9.5	25.3	2.21	9.16	1.91	0.53	1.79	0.26	1.35	0.26	0.68	0.11	0.73	0.1
150	Awulale range	Zb401	Rhyolite	68.72	0.41	15.73	n.a.	n.a.	2.13142	0.05	1.69	1.57	5.88	2.05	0.09	1.09	99.4114	n.a.	40	8.49	3.18	4.22	12.4	61.5	172	0.68	285	17	8.31	0.68	156	4.59	0.98	8.05	2.28	15.6	28.9	3.69	14.3	2.87	0.75	2.7	0.43	2.91	0.61	1.79	0.32	2.37	0.35
151	Awulale range	Zb327	Andesite	57.33	0.83	16.87	n.a.	n.a.	3.22368	0.08	4.51	6.79	4.34	3.66	0.19	2.04	99.8637	n.a.	186	17.6	8.41	14.2	14.9	158	281	1.83	629	26.5	4.64	0.33	90.1	2.87	11	2.35	3.37	5.02	16.4	2.49	11.8	3.28	1.16	4.12	0.71	4.89	1.04	2.87	0.49	3.2	0.43
152	Awulale range	Zb372	Andesite	61.15	1.23	15.77	n.a.	n.a.	7.46647	0.15	1.53	4.04	4.26	3.26	0.38	0.59	99.8265	n.a.	66.2	4.54	9.8	5.76	23.5	95.3	249	3.25	837	53.1	14.7	0.95	726	15.1	11.2	7.77	1.83	29.7	69.3	8.84	40.4	9.43	2.71	9.95	1.57	9.76	1.96	5.36	0.87	6.02	0.8
153	Awulale range	Zb416	Andesite	55.65	0.76	13.52	n.a.	n.a.	6.46421	0.23	8.05	7.05	2.35	4.78	0.14	1.24	100.234	n.a.	217	522	17.5	84	13.6	145	232	0.8	917	20.9	3.78	0.34	108	3.34	21.9	11.4	7.73	5.62	21.2	3.13	14.9	3.56	0.81	4.09	0.55	3.61	0.76	2.12	0.37	2.46	0.35
154	Awulale range	Zb441	Andesite	60.2	1.21	14.82	n.a.	n.a.	5.26395	0.22	4.3	5.3	6.92	0.08	0.41	1.12	99.844	n.a.	159	55.2	29.4	47.1	17.5	4	142	0.52	34.4	30.1	7	0.51	314	7.37	4.06	6.98	2.28	21.6	49.1	6.1	26.7	5.64	1.27	5.82	0.9	5.51	1.08	3.14	0.5	3.48	0.5
155	Awulale range	12ZB53	Andesite	60.9	0.67	17.22	n.a.	n.a.	7.2601	0.08	1.71	1.12	7.7	2.17	0.16	1.07	100.06	n.a.	63	19.5	12.1	3.33	16.8	34.6	69.7	0.48	253	23.5	4.84	0.37	113	3.22	2.89	2.94	0.74	12.5	27.6	3.81	15.8	3.45	0.74	3.74	0.68	4.52	0.99	2.94	0.43	3.12	0.48
156	Awulale range	12ZB54	Andesite	63.86	0.63	16.01	n.a.	n.a.	6.92565	0.06	1.13	0.97	7.41	2.02	0.16	1.03	100.206	n.a.	56.7	18.9	8.82	1.65	14.7	36.2	69.6	0.46	215	23.2	4.61	0.37	109	3.16	3.21	2.94	0.76	11.3	27.4	3.65	15.6	3.97	0.94	4.13	0.7	4.62	0.96	2.7	0.39	2.72	0.4
157	Awulale range	12ZB55	Andesite	61.87	0.66	16.39	n.a.	n.a.	7.6225	0.1	2.37	1	8.1	0.22	0.17	1.68	100.182	n.a.	69.9	28.8	13.1	4.08	15.8	7.68	46.1	0.39	20.4	24	4.59	0.37	115	3.33	3.84	2.7	0.6	4.22	9.87	1.35	6.36	2.03	0.57	2.81	0.57	4.03	0.95	2.82	0.43	3.06	0.49
158	Awulale range	12ZB56	Andesite	63.96	0.63	15.82	n.a.	n.a.	7.2768	0.08	1.91	0.66	7.3	1.34	0.17	1.31	100.457	n.a.	54.4	20.8	12.4	2.05	15.7	25.7	67.5	0.4	110	20.3	4.72	0.4	114	3.42	2.94	2.83	0.73	3.63	9.64	1.46	7.56	2.54	0.59	3.38	0.59	3.71	0.85	2.4	0.4	2.52	0.44
171	Awulale range	Z-5	Andesite	54.33	0.49	16.01	n.a.	n.a.	6.58	0.11	2.9	10.58	5.1	0.92	0.12	2.79	99.93	n.a.	n.a.	n.a.	n.a.	n.a.	n.a.	32.14	601.53	0.15	135.68	21.65	3.54	0.29	81.26	2.81	n.a.	2.68	1.02	14.36	26.87	3.01	11.26	2.85	1.48	3.94	0.51	3.32	0.66	1.88	0.18	1.91	0.38
172	Awulale range	Z-1	Andesite	57.01	0.67	14.89	n.a.	n.a.	7.45	0.35	2.45	8.23	3.88	2.01	0.24	2.48	99.66	n.a.	n.a.	n.a.	n.a.	n.a.	n.a.	160.23	230.56	0.74	1231	30.21	5.02	0.35	100.23	2.48	n.a.	3.7	4.89	5.21	17.08	2.61	9.28	3.21	1.01	5.01	0.78	5.12	0.99	3.02	0.41	3.18	0.41
173	Awulale range	Z-4	Andesite	59.78	0.66	18.01	n.a.	n.a.	6.31	0.04	2.89	4.3	4.22	1.71	0.16	1.87	99.95	n.a.	n.a.	n.a.	n.a.	n.a.	n.a.	80.29	185.45	1.11	185.62	21.18	6.13	0.47	125.36	3.31	n.a.	4.21	1.07	32.14	61.34	6.23	21.31	4.12	1.05	5.01	0.61	4.01	0.67	2.14	0.31	2.01	0.31
174	Awulale range	Z-2	Trachy andesite	58.01	0.71	16.78	n.a.	n.a.	8.03	0.08	3.31	4.13	5.01	1.34	0.15	2.02	99.57	n.a.	n.a.	n.a.	n.a.	n.a.	n.a.	75.89	260.31	0.78	200.16	14.14	4.82	0.39	115.36	3.2	n.a.	3.21	1.29	9.34	20.14	2.35	8.69	2.01	0.67	2.48	0.37	2.14	0.45	1.61	0.22	1.71	0.25
175	Awulale range	Z-3	Trachy andesite	57.67	0.83	15.72	n.a.	n.a.	7.23	0.13	3.21	5.32	5.65	1.69	0.56	1.52	99.53	n.a.	n.a.	n.a.	n.a.	n.a.	n.a.	55.89	620.56	0.54	470.45	15.89	8.24	0.51	230.78	5.41	n.a.	3.1	1.02	35.36	75.14	7.56	30.12	6.31	1.31	6.31	0.71	3.33	0.68	1.8	0.23	1.55	0.31
320-300Ma magmatic rocks
Mafic rocks
161	Awulale range	13WL-7	Hornblende Gabbro	53.5	0.31	17.3	n.a.	n.a.	6.3	0.13	6.38	9.97	3.61	0.2	0.17	1.16	99	n.a.	112.4	32.4	16	12.1	12	2.46	353	0.24	59.05	11.9	0.83	0.07	31.3	0.92	3.48	0.8	0.23	3.52	8.69	1.25	6.07	1.72	0.8	2.05	0.37	2.34	0.51	1.41	0.2	1.31	0.21
162	Awulale range	13WL-9	Hornblende Gabbro	49.7	0.47	22.7	n.a.	n.a.	6.57	0.1	4.38	11.8	2.83	0.24	0.06	1.13	99.9	n.a.	169	20.6	18.6	22.4	17.6	5.57	420.2	0.51	57.34	6.88	1.02	0.09	27.5	0.86	1.65	1	0.26	3.34	7.58	1	4.37	1.09	0.54	1.22	0.21	1.32	0.29	0.8	0.12	0.78	0.12
163	Awulale range	13WL-10	Hornblende Gabbro	50.3	0.69	17.4	n.a.	n.a.	8.58	0.14	6.2	11.9	2.92	0.31	0.09	1.22	99.7	n.a.	255.9	98.3	28.2	34.6	15.4	0.82	298	0.27	63.3	8.94	1.15	0.1	52.2	1.38	1.93	0.4	0.3	2.87	7.33	1.11	5.38	1.57	0.63	1.84	0.35	2.29	0.51	1.4	0.2	1.33	0.2
164	Awulale range	13WL-11	Hornblende Gabbro	49.3	0.66	16.5	n.a.	n.a.	9.58	0.15	7.81	12.2	2.18	0.26	0.08	1.09	99.8	n.a.	223.3	33.4	33.8	46	14.5	4.97	282.6	1.42	60.82	13.9	1.11	0.09	28.6	1.03	1.54	0.74	0.24	3.28	8.48	1.28	6.37	1.89	0.7	2.27	0.42	2.74	0.61	1.65	0.24	1.56	0.24
165	Awulale range	13WL-12	Hornblende Gabbro	50.5	0.99	18.3	n.a.	n.a.	9.41	0.17	4.34	10.2	3.47	0.31	0.24	1.36	99.2	n.a.	245	29.2	35	12.2	19.5	5.53	395	0.29	90.35	17.6	2	0.14	24.6	0.85	1.89	0.66	0.19	5.73	14.1	2.02	10	2.85	1.25	3.3	0.58	3.62	0.77	2.05	0.29	1.8	0.27
166	Awulale range	13WL-13	Hornblende Gabbro	50.5	0.75	15.6	n.a.	n.a.	10.1	0.19	6.46	10.1	2.61	0.39	0.07	2.1	99	n.a.	273.6	33.6	32	25.1	16.5	11.1	264.9	0.42	76.92	17.8	1.95	0.14	37.2	1.21	1.98	1.03	0.27	4.64	11.7	1.67	8.19	2.44	0.96	2.9	0.54	3.51	0.78	2.16	0.32	2.08	0.33
194	Awulale range	ZKTMLK-1	Gabbro	46.9	0.92	18.32	n.a.	n.a.	9.91	0.17	8.5	9.6	2.72	0.47	0.12	1.8	99.43	25.1	155	227	54.3	137	15	8.65	299	1.09	94.2	20.1	1.6	0.074	50.9	1.2	2.81	0.231	0.083	4.08	10.5	1.63	8.15	2.36	0.966	3.08	0.609	3.43	0.779	1.95	0.347	2	0.247
195	Awulale range	ZKTMLK-2	Gabbro	46.38	1.2	17.95	n.a.	n.a.	10.72	0.17	7.47	9.48	3.64	0.31	0.15	2.02	99.49	28.2	187	138	49.6	109	16.1	5.32	287	9.22	101	25.1	1.95	0.107	43.2	1.24	2.17	0.233	0.074	5.05	13.4	2.12	11.5	3.23	1.19	3.83	0.809	4.56	0.92	2.4	0.427	2.82	0.296
196	Awulale range	ZKTMLK-3	Gabbro	46.39	1.03	17.85	n.a.	n.a.	10.35	0.17	8.42	9.77	3.09	0.38	0.14	1.64	99.23	27.5	174	163	52.9	141	15.8	5.89	295	5.22	71.5	23.5	1.75	0.076	45.1	1.16	1.85	0.245	0.076	4.55	12.2	2.01	10.6	2.9	1.15	3.61	0.741	4.24	0.873	2.26	0.411	2.36	0.27
197	Awulale range	ZKTMLK-4	Gabbro	47	1.2	17.01	n.a.	n.a.	10.51	0.18	7.69	10.67	3.06	0.3	0.13	1.7	99.45	41.4	228	291	50.6	121	15.4	4.08	273	5.02	69.1	24.1	1.67	0.089	51.6	1.46	3.6	0.241	0.076	5.58	13.7	2.16	11.6	3.21	1.18	3.79	0.777	4.19	0.956	2.5	0.418	2.37	0.305
198	Awulale range	ZKTMLK-5	Gabbro	46.61	1.25	16.92	n.a.	n.a.	11.2	0.19	7.8	9.8	3.1	0.5	0.14	1.78	99.29	32.9	215	192	53	134	16.1	8.04	294	4.01	86.6	26.8	2.12	0.108	62.9	1.7	2.02	0.325	0.101	5.24	14	2.3	12.3	3.68	1.27	4.07	0.837	4.81	1.04	2.71	0.475	2.87	0.346
199	Awulale range	ZKTMLK-6	Gabbro	46.53	1.15	17.53	n.a.	n.a.	11.15	0.15	8.38	8.99	3.36	0.39	0.15	1.58	99.36	22.7	181	169	54.7	132	15.6	5.46	283	6.55	69.8	24.5	2.02	0.107	49.5	1.24	2.41	0.268	0.086	4.82	12.9	2.07	10.9	3.26	1.16	3.89	0.753	4.44	0.877	2.39	0.44	2.53	0.304
200	Awulale range	ZKTMLK-7	Gabbro	46.44	1.38	17.3	n.a.	n.a.	11.28	0.19	7.31	9.71	3.22	0.35	0.18	1.88	99.24	32.5	221	121	50.5	109	16.1	4.98	309	2.65	102	27.4	2.26	0.108	71.5	1.78	3.27	0.263	0.099	5.11	14.1	2.31	12.9	3.66	1.4	4.14	0.843	5.1	1.06	2.73	0.488	2.96	0.356
201	Awulale range	ZKTMLK-8	Gabbro	46.92	1.2	17.01	n.a.	n.a.	10.87	0.19	8.01	10.08	3.03	0.35	0.15	1.74	99.55	35.5	213	250	52.7	114	15.7	4.89	278	5.07	63.1	25.5	1.89	0.101	50.1	1.32	1.45	0.243	0.084	4.94	12.8	2.06	11.2	3.34	1.31	3.85	0.809	4.31	0.972	2.61	0.422	2.6	0.308
202	Awulale range	ZKTMLK-9	Gabbro	46.61	1.13	16.66	n.a.	n.a.	11.31	0.2	8.25	9.43	3.06	0.39	0.15	1.4	98.59	33.1	199	255	57.1	116	15.7	6.7	291	1.17	77.4	24.9	1.93	0.088	54.4	1.51	2.03	0.31	0.095	5.01	13.3	2.1	10.9	3.06	1.21	3.9	0.772	4.42	0.92	2.39	0.435	2.62	0.312
203	Awulale range	ZKTMLK-10	Gabbro	46.57	1.35	17.33	n.a.	n.a.	11.31	0.19	7.35	9.69	3.01	0.45	0.18	1.98	99.41	33.2	225	137	52	113	16.5	6.93	314	0.938	118	30.1	2.35	0.117	69.2	1.73	3.38	0.275	0.127	5.82	15.4	2.54	13.3	4	1.42	4.52	0.942	5.29	1.13	2.92	0.513	3.2	0.365
204	Awulale range	ZKTMLK-11	Gabbro	46.67	1.18	17.29	n.a.	n.a.	10.63	0.18	8.04	9.81	3.11	0.46	0.16	1.66	99.19	30.7	200	175	51.1	141	15.2	7.13	273	5.02	88.3	25.8	2.05	0.098	66.6	1.72	1.88	0.323	0.125	5.27	14	2.26	11.7	3.35	1.19	3.92	0.77	4.34	0.968	2.43	0.448	2.71	0.319
236	Awulale range	06XJ68	Gabbro	56.13	1.6	13.32	n.a.	n.a.	13.93	0.06	2.9	5.66	2.76	2.01	0.18	1.15	99.7	35.8	246	2.86	25.4	9.06	17.1	68.9	234	2.25	199	38.3	5.53	0.41	154	4.69	2.02	4.14	2.15	8.27	21.7	3.56	17.4	5.41	1.22	5.93	1.14	7.07	1.47	4.13	0.6	4	0.63
237	Awulale range	06XJ70	Gabbro	54.52	1.5	13.83	n.a.	n.a.	13.59	0.07	3.16	6.31	2.62	2.21	0.09	1.67	99.56	21.4	343	15.7	27.3	14	16.6	41.9	253	0.72	340	30.3	4.71	0.33	140	4.03	1.9	2.27	1.01	12.5	32.1	4.53	20.9	5.3	1.21	5.75	1.03	6.28	1.32	3.63	0.53	3.38	0.52
238	Awulale range	06XJ73	Gabbro	51.61	1.14	17.2	n.a.	n.a.	11.6	0.06	3.54	8.48	2.76	1.5	0.09	1.74	99.71	29.7	320	46.1	24	25.3	17.2	38.8	345	0.23	218	26.5	3.58	0.26	102	3	1.53	2.33	0.75	10.8	25.6	3.68	16.5	3.99	1.01	4.24	0.76	4.65	1	2.77	0.4	2.68	0.4
239	Awulale range	06XJ76	Gabbro	57.56	1.13	14.66	n.a.	n.a.	11.7	0.05	2.79	5.52	2.75	1.63	0.11	1.68	99.57	28.9	285	8.26	20.9	7.58	18.1	51.5	267	0.95	227	51.1	4.44	0.34	128	3.98	1.98	3.29	3	9.72	24	3.66	17.2	5.5	1.22	6.45	1.34	8.45	1.88	5.49	0.84	5.98	1.04
240	Awulale range	06XJ77	Gabbro	55.61	1.36	14.14	n.a.	n.a.	12.35	0.14	3.18	6.92	2.95	1.6	0.18	1.04	99.46	32.1	304	7.49	26.2	12.4	17	43.4	319	1.9	345	32.1	4.83	0.34	134	3.92	3.91	3.43	0.99	13	30.1	4.38	19.3	4.98	1.26	5.22	0.94	5.84	1.21	3.44	0.51	3.21	0.5
241	Awulale range	06XJ80	Gabbro	51.81	0.74	17.14	n.a.	n.a.	10.38	0.13	5.29	8.77	3.27	0.9	0.03	1.23	99.68	30.6	248	68.3	25.2	32.1	16.2	25	357	0.63	209	17	2.1	0.15	60.6	1.7	3.26	1.34	0.39	7.18	16.7	2.35	10.6	2.63	0.81	2.69	0.49	2.96	0.65	1.82	0.27	1.73	0.28
242	Awulale range	NL07-15	Hornblende gabbro	52.45	0.65	19.92	n.a.	n.a.	4.84	0.09	5.48	12.33	2.16	0.42	0.16	1.54	100	31.51	199.6	96.27	16.51	31.44	16.55	11.16	453.2	0.57	84.48	13.96	2.66	0.2	59.71	1.67	2.2	1.74	0.68	7.79	16.14	2.27	9.56	2.25	0.85	2.38	0.43	2.72	0.57	1.6	0.24	1.57	0.24
243	Awulale range	NL1-1	Hornblende gabbro	48.75	0.95	18.43	n.a.	n.a.	7.3	0.19	6.33	14.24	1.85	0.32	0.25	0.88	99.49	37.53	324.6	73.5	20.82	26.23	19.21	7.59	457.8	0.37	98.49	15.03	2.4	0.17	30.64	0.99	10.11	0.47	0.2	7.42	15.64	2.28	9.84	2.53	0.95	2.71	0.46	2.91	0.61	1.7	0.26	1.69	0.26
244	Awulale range	NL1-4	Hornblende gabbro	51.87	0.8	19.3	n.a.	n.a.	6.8	0.1	4.9	12.03	2.58	0.2	0.16	1.16	99.9	20.53	297.3	70.37	17.61	18.59	18.73	3.71	519.7	0.57	63.31	14.7	2.51	0.17	43.19	1.3	43.39	0.8	0.33	6.77	14.78	2.18	9.27	2.61	0.84	2.73	0.47	3.01	0.62	1.69	0.26	1.63	0.25
245	Awulale range	NL4-5	Hornblende gabbro	49.89	0.89	16.4	n.a.	n.a.	9.41	0.2	6.76	10.26	2.91	0.6	0.28	1.5	99.1	33.49	215.1	230.1	33.82	64.24	16.82	14.63	440.1	0.4	161.8	21.21	4.26	0.28	83.54	2.23	1.83	1.86	0.35	12.7	26.41	3.79	16	3.99	1.23	3.91	0.65	3.93	0.82	2.24	0.33	2.18	0.34
246	Awulale range	NL6-1	Hornblende gabbro	47.2	1.06	18.1	n.a.	n.a.	11.85	0.14	5.71	11.27	2.2	0.89	0.22	1.14	99.79	38.41	356.7	43.08	29.32	23.53	18.87	21.91	455.9	0.57	141.4	12.9	2.04	0.15	28.23	0.9	18.85	1.09	0.34	6.66	14.03	2.03	8.93	2.19	0.82	2.41	0.39	2.51	0.51	1.44	0.22	1.45	0.22
290	Alatao range	WXT721	Basalt	51.91	2.47	14.38	10.1	1.74	n.a.	0.15	4.21	3.68	3.53	1.07	0.31	6.1	99.65	31.6	282	47.4	31.9	64.5	20.3	18.2	905	n.a.	725	39	7.62	0.578	224	5.11	3.25	0.976	0.297	10.3	27.1	4.03	20.7	5.81	2.08	6.5	0.99	6.21	1.46	3.98	0.532	3.59	0.59
291	Alatao range	WXT727	Basalt	50.67	2.33	15.15	8.2	2.25	n.a.	0.12	4.09	5.72	2.94	1.02	0.29	6.88	99.66	26.5	242	39.4	35.8	38.6	19.6	19	633	n.a.	676	34.8	7.46	0.588	209	5.09	3.93	1.63	0.49	10.7	28.1	4.04	19.9	5.39	1.83	5.49	0.911	5.79	1.37	3.72	0.526	3.55	0.561
292	Alatao range	XT012-1	Basalt	54.67	3.61	12.59	8	4.22	n.a.	0.14	2.15	5.05	2.96	1.46	0.42	4.61	99.88	32.6	410	11.6	33.4	9.14	24.3	25.5	368	n.a.	382	46.3	10.3	0.721	306	7.79	6.49	2.41	0.608	17.4	43.6	6.58	30.1	7.43	2.5	8.58	1.45	8.61	1.74	4.75	0.743	4.89	0.792
293	Alatao range	XT012	Basalt	53.62	3.21	14.23	7.03	5.73	n.a.	0.2	2.43	5.24	3.58	1.59	0.48	2.29	99.63	8.18	384	9.92	29.4	5.29	23	3.22	293	n.a.	312	16	10	0.607	356	7.1	4.92	0.381	0.673	8.33	23.82	3.91	19.18	4.81	1.55	5.22	0.981	6.09	1.32	3.79	0.545	3.34	0.517
294	Alatao range	XT014	Basalt	50.34	2.97	16.59	7.96	2.92	n.a.	0.03	6.56	5.66	2.78	0.59	0.33	4.04	100.78	32.7	284	74.3	38.9	56.7	19.2	4.64	409	n.a.	91	32.9	5.87	0.397	203	4.74	1.63	0.709	0.226	9.34	25.7	4.09	20.1	5.1	1.69	6.2	1.04	6.19	1.25	3.36	0.509	3.31	0.521
295	Alatao range	XT017	Basalt	53.28	3.56	15.16	8.5	5.37	n.a.	0.27	3.18	2.59	3.26	1.41	0.41	3.18	100.16	12	416	14.1	32.2	9.6	22	4	354	n.a.	309	17	10	0.584	336	6.74	4.59	0.428	0.579	7.49	21.7	3.61	17.78	4.6	1.53	5	0.94	5.84	1.26	3.55	0.519	3.14	0.482
296	Alatao range	P154-3	Basalt	46.07	2.5	14.43	9.1	4.29	n.a.	0.3	5.39	8.9	2.9	0.36	0.42	4.68	99.34	n.a.	n.a.	n.a.	n.a.	n.a.	n.a.	n.a.	n.a.	n.a.	296	44	12.9	n.a.	277	n.a.	n.a.	n.a.	n.a.	11.3	31.56	5.27	24.7	6.95	2.38	7.98	1.41	8.47	1.8	5.24	0.78	4.67	0.72
297	Alatao range	P201	Basalt	51.37	2	15.27	6.36	4.71	n.a.	0.23	2.47	7.29	3.4	0.55	0.57	5.54	99.76	n.a.	n.a.	n.a.	n.a.	n.a.	n.a.	n.a.	n.a.	n.a.	179	38	11.1	n.a.	271	n.a.	n.a.	n.a.	n.a.	17.5	42.13	6.42	26.59	6.8	1.82	7.92	1.24	6.96	1.5	4.47	0.66	4.09	0.6
333	Awulale range	04XJ-281	Trachy basalt	49.51	1.8	15.86	4.87	n.a.	11.9743	0.62	7.55	5.8	2.03	4.3	0.5	4.19	99.48	n.a.	224	171	43.1	116	15.7	207	519	3.72	2819	26.8	5.86	0.36	163	3.77	23.01	1.27	0.35	14.3	35.2	4.99	21.7	4.9	1.54	5.34	0.83	4.75	1	2.64	0.39	2.46	0.39
334	Awulale range	04XJ-282	Trachy basalt	48.94	1.92	16.21	5.19	n.a.	11.8942	0.27	6.73	6.73	1.26	5.5	0.5	3.76	99.58	n.a.	240	178	42.4	113	17.8	198	986	4.49	1762	28.1	6.25	0.38	169	3.8	31.44	1.37	0.39	15.1	38.1	5.49	23.2	5.37	1.77	5.65	0.91	5.17	1.08	2.87	0.4	2.53	0.39
335	Awulale range	04XJ-284	Trachy basalt	50.71	1.87	15.34	5.29	n.a.	12.023	0.28	6.84	4.62	2.01	5.53	0.5	3.48	99.36	n.a.	211	175	38.2	109	13.1	184	765	3.4	4881	26.1	5.9	0.37	161	3.67	26.5	1.27	0.39	14.8	36.5	5.09	22	4.95	1.62	5.3	0.82	4.75	0.97	2.65	0.38	2.48	0.38
336	Awulale range	YXAn-8	Basaltic Andesite	53.9	0.92	16.7	n.a.	n.a.	9.01	0.19	4.7	7.97	3.11	1.2	0.13	1.99	99.86	n.a.	229	137	26.2	22.2	16.6	48.9	305	0.81	239	23.7	3.54	0.29	114	3.18	15.2	3.41	1.04	10	22.3	3.22	14.2	3.52	1.05	3.9	0.77	4.63	0.94	2.69	0.4	2.63	0.42
337	Awulale range	YX2-2	Basaltic Andesite	53.8	1	15.8	n.a.	n.a.	9.71	0.32	4.09	9.75	3.27	0.81	0.31	1.13	99.92	n.a.	238	201	26.7	51.6	17.5	31.8	329	0.88	114	23.7	4.28	0.34	129	3.77	6.28	5.33	1.26	12.2	27.1	3.72	16.9	3.99	1.18	4.44	0.8	4.69	0.96	2.78	0.41	2.67	0.42
338	Awulale range	YX2-3	Basaltic Andesite	51	1.05	16.1	n.a.	n.a.	14	0.32	4.82	5.28	2.62	1.52	0.3	2.86	99.88	n.a.	267	219	40.6	62.2	19.4	60.2	268	2.15	404	21.9	4.39	0.35	135	3.91	6.44	5	1.39	13.1	28.5	3.77	17	3.89	0.85	4.15	0.71	4.21	0.87	2.47	0.36	2.44	0.41
339	Awulale range	YX2-7	Basaltic Andesite	53.6	1.02	16.3	n.a.	n.a.	10.1	0.3	3.46	8.02	3.73	1.6	0.33	1.46	99.91	n.a.	259	237	24.6	54.1	17.7	79.9	302	1.02	206	22.1	4.25	0.35	131	3.73	5.64	5.01	1.25	11.8	25.2	3.51	15.7	3.76	1.05	4.03	0.75	4.37	0.91	2.64	0.39	2.58	0.4
340	Awulale range	YX3-3	Basaltic Andesite	56.1	0.81	16.6	n.a.	n.a.	7.91	0.21	4.2	8.5	2.72	1.28	0.23	1.39	99.89	n.a.	223	129	22.7	32.4	17.6	54.2	384	1.28	284	20.2	3.97	0.36	131	3.76	4.14	5.39	1.43	10.8	24.2	3.29	14.5	3.27	0.98	3.63	0.66	3.95	0.83	2.33	0.36	2.3	0.36
341	Awulale range	YX08-2	Basaltic Andesite	55.6	1.2	18.5	n.a.	n.a.	8.21	0.14	3.12	5.36	3.36	1.83	0.31	2.09	99.68	n.a.	274	248	82.1	114	19.9	84.2	213	n.a.	226	19.8	5.69	0.43	158	4.15	7.17	6.12	2.86	16.9	36	5	20.7	4.54	1.18	4.11	0.63	3.99	0.83	2.18	0.33	2.19	0.32
342	Awulale range	YX08K-1	Basaltic Andesite	56.1	1	16	n.a.	n.a.	11.2	0.15	2.61	5.58	2.65	1.93	0.23	2.22	99.64	n.a.	280	248	56.8	71	19	92.5	196	n.a.	158	16.8	4.69	0.32	126	3.59	5.18	5.76	2.22	13.2	32	4.51	19.4	4.41	1.03	3.81	0.63	3.77	0.75	2.07	0.32	2.05	0.33
343	Awulale range	BST08-1	K-rich trachyandesite	50.7	1.3	17.8	n.a.	n.a.	11	0.25	3.8	4.5	3.98	3.86	0.24	2.34	99.7	n.a.	371	33.1	29.7	29.2	21.3	214	380	n.a.	783	33.5	4.89	0.36	154	4.31	14.9	4.31	1.48	14	32.1	4.93	22	5.59	1.63	5.88	1.02	6.07	1.32	3.75	0.52	3.48	0.57
344	Awulale range	BST08-2	K-rich trachyandesite	50.6	1.28	17.9	n.a.	n.a.	10.3	0.26	3.8	4.62	3.21	4.63	0.24	2.88	99.73	n.a.	340	27.6	27.3	28.1	19.6	243	340	n.a.	1065	32.2	4.76	0.33	142	4.13	15.8	4.37	1.35	13.5	29.9	4.56	21	5.37	1.46	5.75	0.97	6.16	1.33	3.72	0.55	3.54	0.55
345	Awulale range	BST08-3	K-rich trachyandesite	50.8	1.13	18.4	n.a.	n.a.	10.2	0.17	3.29	6.12	4.04	3.24	0.21	2.11	99.7	n.a.	258	29.5	35.1	31.9	19.8	160	305	n.a.	331	26.8	4.08	0.28	123	3.23	9.25	3.21	0.97	10.2	24.5	3.79	17.4	4.53	1.3	4.72	0.83	4.83	1.09	2.92	0.43	2.68	0.43
346	Awulale range	BST08-4	K-rich trachyandesite	50.7	1.12	18.5	n.a.	n.a.	10.1	0.18	3.31	6.4	3.95	3.14	0.21	2.14	99.71	n.a.	283	31.9	33.9	32.3	21.2	168	330	n.a.	337	28.2	4.05	0.29	121	3.46	9.92	3.18	1.08	10.4	27.2	3.97	18.5	4.7	1.35	5.11	0.88	5.48	1.13	3.07	0.43	2.9	0.46
347	Awulale range	BST-6	K-rich trachyandesite	55.3	0.84	16.6	n.a.	n.a.	8.97	0.3	3.65	1.88	3.93	4.72	0.21	3.51	99.82	n.a.	249	4.68	24	1.41	17.8	181	94.2	2.67	743	23.7	3.37	0.32	115	3.33	10.6	4.07	1.27	21.3	44.9	5.89	24.9	5.12	1.25	4.76	0.78	4.56	0.94	2.76	0.4	2.65	0.44
348	Awulale range	BST-6B	K-rich trachyandesite	53.4	0.92	17.5	n.a.	n.a.	10	0.62	3.82	1.16	2.58	7.02	0.22	2.71	99.85	n.a.	250	4.43	21.2	3.51	18.9	325	167	3.4	1592	27	3.91	0.36	131	4.01	4.67	4.93	1.5	13.2	29.7	4.03	17.9	4.17	0.97	4.85	0.87	5.37	1.1	3.12	0.47	3.23	0.51
349	Awulale range	BST-11	K-rich trachyandesite	53.9	1.12	17.9	n.a.	n.a.	9.09	0.5	3.52	3.3	1.91	5.03	0.2	3.22	99.67	n.a.	312	27	22.2	22.6	14.9	230	267	1.62	1685	27.6	3.74	0.31	120	3.73	87.8	3.39	1.13	10.2	25.3	3.68	17.6	4.55	1.07	5.21	0.94	5.64	1.16	3.29	0.48	3.27	0.54
350	Awulale range	ALSB-1	K-rich trachyandesite	53.3	1.02	16.8	n.a.	n.a.	8.16	0.56	3.83	2.74	4.24	4.89	0.24	4.04	99.75	n.a.	342	55.2	33.2	24.3	19.5	261	264	n.a.	931	23.4	3.78	0.29	128	3.38	103	3.03	0.81	9.6	22.8	3.39	15	3.74	1.08	4.07	0.71	4.79	0.98	2.97	0.41	2.74	0.41
351	Awulale range	ALSB-2	K-rich trachyandesite	55.9	1.3	17.1	n.a.	n.a.	9.83	0.13	1.98	1.19	4.54	5.32	0.2	2.28	99.7	n.a.	265	56	54.5	12.1	19.3	233	175	n.a.	1542	35.3	5.69	0.49	188	4.98	29.4	5.08	1.83	12.8	32.1	4.96	22.7	5.9	1.83	6.54	1.12	6.69	1.38	3.76	0.54	3.54	0.55
352	Awulale range	YXAn-4	K-rich trachyandesite	58	0.86	16.4	n.a.	n.a.	8	0.17	2.85	3.54	3.76	4.81	0.11	1.37	99.91	n.a.	147	10.7	18.4	5.58	15.6	129	234	1.74	944	17.2	3.24	0.32	91.2	2.85	9.56	4.88	1.15	8.64	18.9	2.52	10.7	2.63	0.69	2.94	0.54	3.38	0.67	2	0.3	2.1	0.35
353	Awulale range	YX2-5	K-rich trachyandesite	52.6	1.04	16	n.a.	n.a.	9.49	0.38	4.4	7.47	3.49	3.23	0.31	1.48	99.9	n.a.	232	228	28.9	72	17.5	101	280	0.67	685	26	4.57	0.36	132	3.91	5.05	5.22	1.51	14.2	33.1	4.59	20.6	4.82	1.24	5.06	0.91	5.3	1.05	2.96	0.44	2.91	0.45
354	Awulale range	YX2-6	K-rich trachyandesite	53.7	1.04	16.2	n.a.	n.a.	9.84	0.3	3.22	7.57	3.13	3.22	0.34	1.33	99.9	n.a.	260	226	27.5	57.7	18.3	108	319	1.37	617	22.8	4.42	0.37	135	3.88	7.17	4.85	1.15	15	31.2	4.24	18.8	4.22	1.1	4.53	0.79	4.49	0.92	2.65	0.4	2.6	0.41
355	Awulale range	YX08-1	K-rich trachyandesite	47.9	1.04	17.4	n.a.	n.a.	15.3	0.27	3.88	6.88	2.61	2.52	0.35	1.64	99.68	n.a.	244	207	103	153	23.6	103	183	n.a.	369	36.6	5.07	0.38	149	3.84	7.82	4.7	2.72	13.5	33.9	5.55	25.1	6.26	1.63	6.29	1.1	6.71	1.45	4.27	0.62	4.28	0.71
356	Awulale range	YX6-13	K-rich trachyandesite	53.1	0.54	15.3	n.a.	n.a.	14	0.28	2.09	8.24	0.09	4.47	0.04	2.37	100.6	n.a.	225	12.4	152	30.4	27.5	112	608	0.5	584	17.9	2.29	0.23	64.3	1.94	29.8	2.64	1.6	8.66	17.5	2.23	9.8	2.28	0.79	2.93	0.55	3.5	0.7	2.03	0.3	1.9	0.29
357	Awulale range	YXAn-6	K-rich trachyandesite	56.8	0.95	16.7	n.a.	n.a.	7.58	0.21	3.69	4.1	4.94	3.09	0.12	1.68	99.9	n.a.	209	15.6	22.3	6.8	16.5	102	283	0.98	546	18.4	3.09	0.27	84	2.53	3.48	4.05	1	9.14	19.8	2.69	11.5	2.82	0.91	3.1	0.59	3.5	0.72	2.11	0.31	2.12	0.35
358	Awulale range	YX2-1	K-rich trachyandesite	52.1	1	15.4	n.a.	n.a.	10.9	0.42	4.33	8.95	2.91	2.3	0.32	1.26	99.91	n.a.	238	205	26.6	55.3	17.2	84.5	291	0.47	352	21.4	3.91	0.33	124	3.57	6.19	4.54	1.09	13.4	29.6	3.94	17.4	3.86	1.02	3.98	0.68	4.11	0.83	2.42	0.37	2.44	0.38
359	Awulale range	YX6-2	K-rich trachyandesite	54.7	0.87	18.3	n.a.	n.a.	7.41	0.22	4.26	3.38	5.85	2.76	0.11	2.12	99.88	n.a.	214	44.3	25.9	25	21.5	131	215	2.22	358	22.9	3.83	0.4	124	3.78	3.27	6.31	1.96	21.5	44.6	5.61	23.2	4.83	1.61	5	0.85	4.84	0.94	2.61	0.39	2.64	0.43
360	Awulale range	YX08-4	K-rich trachyandesite	58.6	0.85	17	n.a.	n.a.	6.8	0.22	3.15	4.52	3.72	3.48	0.12	1.24	99.66	n.a.	209	13	26.8	6.37	18.7	130	291	n.a.	567	19.9	3.92	0.38	106	2.96	8.78	5.37	1.47	10.5	22.5	3.18	13.7	3.33	1.02	3.31	0.58	3.75	0.8	2.14	0.31	2.18	0.34
361	Awulale range	BST-3B	K-rich trachyandesite	54.6	0.86	16.6	n.a.	n.a.	11	0.24	4.29	2.57	4.24	2.62	0.11	2.78	99.86	n.a.	272	5.51	19.5	2.38	18.9	81.5	251	1.06	403	25	3.61	0.32	118	3.41	5.61	4.25	1.15	13.1	28.8	3.8	16.3	3.74	1.04	4.2	0.77	4.81	0.97	2.85	0.42	2.75	0.45
362	Awulale range	/	Basaltic Trachyandesite	54.91	0.93	15.79	n.a.	n.a.	7.52	0.3	4.61	5.19	5.4	1.8	0.14	3.35	99.94	n.a.	184	84	23.2	52.9	13.5	53.3	220	n.a.	478	22.4	3.6	0.3	197	4.77	2.58	4.66	1.4	10.2	22.9	3.25	14.2	3.36	1.1	3.49	0.72	3.95	0.81	2.82	0.44	2.59	0.42
364	Awulale range	/	Basaltic Trachyandesite	55.04	0.94	14.89	n.a.	n.a.	7.97	0.23	6.23	6.49	4.86	1.31	0.17	1.86	99.99	n.a.	223	155	13	40.5	15.6	51.1	301	n.a.	509	33.2	4.27	0.38	200	5.56	1.49	5.52	5.91	6.5	18.6	2.88	14.8	4.92	1.22	4.75	0.83	5.06	1.21	4.12	0.61	3.94	0.54
368	Awulale range	/	Basaltic Trachyandesite	56.75	1.82	13.63	n.a.	n.a.	10.11	0.25	3.53	5.48	3.91	2.03	0.48	1.96	99.95	n.a.	385	2.74	30.3	19.6	16	83.8	306	n.a.	331	46.4	8.04	0.58	399	9.4	7.26	5.77	1.79	20.3	49.1	7.08	29.9	7.76	2.1	7.52	1.54	8.58	2.01	5.04	0.83	5.2	0.82
381	Awulale range	/	Basaltic Trachyandesite	54.17	1.11	15.62	n.a.	n.a.	5.45	0.14	4.53	11.34	3.24	2.71	0.31	1.36	99.98	n.a.	180	73.2	14.6	44.1	14.2	74.3	466	n.a.	373	27.4	5.85	0.43	128	3.5	4.48	5.85	1.66	17.6	38.4	5.45	21.6	5.4	1.48	5.05	0.91	4.7	1.15	3.47	0.46	2.98	0.51
365	Awulale range	/	Basaltic Andesite	53.15	0.78	12.42	n.a.	n.a.	8.97	0.23	9.71	8.84	3.54	0.64	0.12	1.57	99.97	n.a.	214	667	26.4	96.8	12.3	25.6	271	n.a.	105	31.3	3.93	0.4	199	5.84	3.04	11.8	9.56	4.64	19.9	4	19.9	4.34	1.27	4.97	0.9	4.89	1.26	3.89	0.63	3.84	0.68
363	Awulale range	/	Basaltic Andesite	52.77	1	15.19	n.a.	n.a.	6.86	0.27	6.56	10.21	4.24	0.7	0.13	2.03	99.96	n.a.	286	172	14.6	35.6	12.8	39.8	418	n.a.	106	30.2	3.75	0.4	171	4.83	3.44	4.93	7.04	6.58	21.6	3.36	14.8	3.96	1.19	4.33	0.79	4.66	1.14	3.31	0.61	3.54	0.67
366	Awulale range	/	Basalt	52.7	0.99	15.08	n.a.	n.a.	9.66	0.15	3.29	13.06	1.14	1.55	0.22	2.07	99.91	n.a.	131	18.6	18	40.9	23.7	51	793	n.a.	234	48.8	10.4	0.87	344	9.12	12.2	8.04	4.68	29.2	60.3	7.8	34.7	7.52	3.03	7.67	1.53	8.44	1.78	5.26	0.89	5.23	0.78
373	Awulale range	/	Basalt	47.47	2	11.81	n.a.	n.a.	7.6	0.99	3.98	22.75	0.91	1.77	0.33	0.37	99.98	n.a.	230	5.13	14.5	21.3	16.5	64.7	42.6	n.a.	338	41.8	7.39	0.63	382	10.1	70.7	6.39	4.35	33	55.3	6.35	25.9	7.05	1.98	6.56	1.29	7.47	1.73	4.84	0.71	4.7	0.75
376	Awulale range	/	Basalt	51.62	0.85	13.68	n.a.	n.a.	8.11	0.11	9.13	10.28	2.86	0.82	0.17	2.32	99.95	n.a.	251	363	33.8	56.8	13.2	31.4	627	n.a.	166	30	5.69	0.43	125	3.89	1.7	6.63	1.07	23.9	50.9	7.03	29.6	6.82	1.58	5.41	1.01	6.05	1.2	3.5	0.51	3.3	0.56
378	Awulale range	/	Basalt	50.5	1.6	15.42	n.a.	n.a.	7.64	0.1	7.47	8.43	3.85	1.12	0.42	3.41	99.96	n.a.	216	285	22.5	150	15.5	71.8	397	n.a.	111	29	10.2	0.72	117	2.69	1.54	2.17	0.58	20.6	43.2	5.89	25.3	5.24	1.58	4.68	0.99	5.47	1.11	2.93	0.45	2.48	0.38
379	Awulale range	/	Basalt	49.25	1.63	15.49	n.a.	n.a.	6.62	0.08	6.76	11	3.65	1	0.43	4.02	99.93	n.a.	225	277	17	112	15.2	66.9	421	n.a.	67.3	34.9	10.4	0.71	221	5.8	1.99	2.1	2.4	32.2	78	10.9	45.6	9.84	3.17	7.59	1.44	7.25	1.37	3.72	0.58	3.15	0.5
369	Awulale range	/	Trachybasalt	48.09	1.25	16.58	n.a.	n.a.	12.78	0.43	5.79	5.76	4.09	1.42	0.53	3.24	99.96	n.a.	228	103	35.7	70.2	19.4	53.2	339	n.a.	478	31.6	14.5	0.82	426	9.21	5.47	2.89	0.97	39.1	80.4	10	39.6	8.31	2.51	7.1	1.04	5.98	1.32	3.64	0.53	3.05	0.43
380	Awulale range	/	Trachybasalt	51.01	1.83	14.63	n.a.	n.a.	7.21	0.09	5.71	10.25	3.52	2.02	0.53	3.13	99.93	n.a.	201	171	19.7	72.5	13.8	114	398	n.a.	286	39.8	5.81	0.12	223	5.3	3	2.79	0.8	26.1	61.7	9.11	38.8	8.9	2.29	7.49	1.37	7.53	1.61	4.35	0.73	3.93	0.6
375	Awulale range	BZ07	Trachybasalt	53.38	1.28	16.3	4.4	n.a.	6.73	0.12	4.99	9.23	3.34	2.29	0.49	1.79	99.94	31.1	221	73.8	15.4	19.1	16	56.9	554	n.a.	850	29.8	10.2	0.62	179	4.48	1.38	2.21	0.55	24.8	52.9	7.61	31.4	6.16	2.05	5.75	1.08	5.52	1.08	3.37	0.52	2.87	0.42
382	Awulale range	CGB-1	Basalt	48.12	1.13	14.4	n.a.	n.a.	14.55	0.55	6.22	7.2	2.26	2.96	0.23	2.2	100.05	n.a.	210	250	20.6	27.3	13.9	71.5	180	0.53	1545	20.1	4.72	0.31	100	2.62	3.81	1.89	0.88	3.71	12.4	2.01	9.51	2.83	0.55	3.06	0.58	3.54	0.73	2.02	0.29	1.94	0.32
383	Awulale range	CGB-2	Basalt	45.7	0.98	11.64	n.a.	n.a.	20.79	0.39	6.13	8.56	1.83	2.17	0.21	1.39	99.93	n.a.	163	300	13.2	15.4	11.4	37.4	111	0.31	730	12.2	3.64	0.24	80.4	2.11	2.52	1.54	1.39	3.63	11.1	1.68	7.72	1.86	0.51	2.08	0.37	2.03	0.44	1.29	0.19	1.21	0.23
384	Awulale range	CGB-3	Basalt	44.19	0.89	11.36	n.a.	n.a.	21.79	0.47	6.7	9.15	1.62	1.7	0.16	1.73	99.87	n.a.	215	320	40.1	34.2	14.3	36.1	93.2	0.34	476	13.6	2.84	0.21	65.4	1.74	4.59	1.34	0.48	2.32	5.81	0.92	4.73	1.51	0.27	1.77	0.35	2.21	0.47	1.38	0.21	1.33	0.21
385	Awulale range	CGB-4	Basalt	51.07	0.87	14.25	n.a.	n.a.	16.85	0.65	6.99	3.44	0.41	0.75	0.4	4.26	99.94	n.a.	229	236	70.4	66.1	16.7	27.9	223	n.a.	112	17.3	4.45	0.29	112	2.63	3.28	3.63	1.3	9.41	21.1	3.13	14.1	3.45	0.82	3.36	0.56	3.34	0.66	1.82	0.27	1.82	0.27
386	Awulale range	CGB-5	Basalt	43.11	0.72	9.43	n.a.	n.a.	22.68	0.36	7.35	12.13	0.93	1.82	0.13	1.12	99.8	n.a.	185	617	45.8	43.2	13.8	32.9	67.3	n.a.	326	13.2	2.52	0.18	57.8	1.52	6.46	1.93	2.23	3.93	9.71	1.55	7.39	2.06	0.69	2.31	0.36	2.57	0.53	1.53	0.22	1.33	0.21
387	Awulale range	CGB-6	Basalt	44.75	0.94	10.87	n.a.	n.a.	21.92	0.51	6.67	8.77	1.17	2.09	0.13	1.74	99.56	n.a.	191	230	25.3	19.5	12.8	42.1	76.1	1.43	624	13.1	3.26	0.25	72.7	2.09	2.59	1.72	0.78	1.55	5.96	1.08	5.52	1.66	0.25	1.93	0.38	2.35	0.49	1.38	0.19	1.26	0.2
388	Awulale range	CGB-7	Basalt	50.39	0.92	10.62	n.a.	n.a.	15.89	0.93	7.7	6.12	2.12	2.83	0.08	2.28	99.87	n.a.	168	25.7	17.7	9.53	12.7	63.1	21.9	1.22	392	25.1	2.49	0.2	70.7	2.23	3.2	1.8	1.19	2.91	9.76	2.31	12.9	4.02	0.83	4.42	0.81	5.08	1.07	2.94	0.42	2.73	0.45
389	Awulale range	CGB-8	Basalt	45.48	1.26	13.87	n.a.	n.a.	18.21	0.42	5.63	9.57	2.08	1.62	0.22	1.53	99.91	n.a.	212	163	30.3	40.1	12.9	57.5	178	1.68	290	19.3	4.78	0.35	97.8	2.73	8.27	2.06	1.29	2.79	11.7	2.14	10.5	2.95	0.54	3.09	0.57	3.46	0.72	2.03	0.27	1.83	0.27
390	Awulale range	CGB-9	Basalt	47.19	0.77	12.78	n.a.	n.a.	17.85	0.51	5.73	7.61	1.99	2.74	0.1	2.26	51.57	n.a.	130	80.3	12.8	6.78	11.2	57.8	153	1.67	1377	18.3	3.22	0.27	75.6	2.37	2.25	2.49	1.82	5.19	13.6	2.19	10.4	2.78	0.69	3.06	0.55	3.43	0.72	2.05	0.29	1.97	0.3
391	Awulale range	CGB-10	Basalt	44.77	1.25	13.92	n.a.	n.a.	18.93	0.48	5.63	9.53	1.94	1.66	0.22	1.59	99.91	n.a.	199	150	18.2	40.5	12.9	57.5	159	2.15	311	18.1	4.83	0.35	100	2.79	3.52	2.12	1.67	2.18	8.83	1.67	8.63	2.62	0.44	2.86	0.53	3.29	0.67	1.84	0.26	1.66	0.26
392	Awulale range	CGB-11	Basalt	46.4	1.06	12.87	n.a.	n.a.	17.42	0.5	6.63	7.17	1.77	2.78	0.2	2.75	52.08	n.a.	199	222	17.3	26.9	12.5	72.5	142	1.19	1131	17.4	3.89	0.29	83.4	2.46	7.54	1.98	1.38	3.39	14.8	2.69	12.5	3.13	0.74	3.19	0.53	3.23	0.67	1.93	0.27	1.74	0.28
393	Awulale range	CGB-12	Basalt	45.49	0.84	12.33	n.a.	n.a.	19.42	0.66	7.38	7.61	2.51	0.82	0.17	2.36	99.59	n.a.	218	302	14.4	39.8	12.8	12.1	100	0.18	233	14.9	2.56	0.21	62.2	1.8	7.49	1.97	0.88	2.16	8.01	1.37	6.66	1.84	0.37	2.12	0.39	2.51	0.58	1.59	0.26	1.65	0.25
394	Awulale range	CGB-13	Basalt	43.42	0.7	9.01	n.a.	n.a.	21.13	0.55	7.61	13.38	0.95	1.55	0.14	1.44	99.88	n.a.	187	596	40.5	36.6	14.6	30.7	51.2	0.38	373	14.9	2.48	0.19	59.9	1.71	1.83	1.5	0.67	2.1	9.15	1.67	8.33	2.29	0.48	2.52	0.43	2.7	0.59	1.49	0.22	1.48	0.23
395	Awulale range	CGB-14	Basalt	54.27	0.85	13.93	n.a.	n.a.	15.39	0.6	6.16	3.3	0.26	0.74	0.42	3.85	99.77	n.a.	202	243	71.8	67.9	16	27.7	182	n.a.	113	16.5	4.32	0.3	104	2.78	3.12	3.44	1.22	10.3	22.8	3.39	15.1	3.67	0.9	3.59	0.55	3.39	0.69	1.92	0.24	1.76	0.28
401	Awulale range	DD-2	Basaltic Tuff	50.3	1.28	16.23	n.a.	n.a.	9.92227	0.25	5.09	7.12	4.3	1.03	0.66	3.43	102.75	n.a.	n.a.	n.a.	n.a.	61.2	18.4	39.8	476	1.59	185	26.7	11.4	0.73	237	4.79	24.3	2.59	0.72	35.2	77.3	9.62	37.8	7.31	2	6.77	0.93	5.12	0.97	2.76	0.35	2.37	0.34
402	Awulale range	DD-30	Basaltic Tuff	48.99	1.19	17.32	n.a.	n.a.	9.68208	0.29	4.66	8.97	3.77	1.8	0.53	2.45	101.86	n.a.	n.a.	n.a.	n.a.	60.4	21.3	62.1	822	1.36	419	26.8	11.8	0.67	230	5.19	5.53	2.38	0.69	33.5	72.4	8.63	34	6.77	2	6.34	0.92	5.2	0.98	2.91	0.38	2.45	0.36
403	Awulale range	DD-59	Andesitic Tuff	54.6	1.17	15.83	n.a.	n.a.	8.162	0.22	4.71	6.47	4.44	1.54	0.54	2.64	102.78	n.a.	n.a.	n.a.	n.a.	34	19.6	55.4	436	1.38	218	30.2	11	0.56	264	5.01	3.79	2.26	0.68	28.2	61.2	7.34	29.9	6.1	1.67	5.64	0.91	5.11	1	2.96	0.39	2.62	0.39
404	Awulale range	D-4	Basalt	47.72	0.8	16.6	n.a.	n.a.	9.25	0.98	4.62	11.2	3.81	0.84	0.63	3.27172	99.7217	n.a.	n.a.	n.a.	n.a.	n.a.	n.a.	15.07	557.02	0.26	148.19	23.02	11.21	0.311902	206.57	5.25	n.a.	1.88	0.56	31.38	68.2	8.51	35.49	8.01	2.01	7.01	0.84	5.02	0.91	3.3	0.35	3.1	0.2
405	Awulale range	D-8	Basalt	50.01	0.78	14.78	n.a.	n.a.	8.02	0.17	6.35	11.89	4.19	0.7	0.51	2.12	99.52	n.a.	n.a.	n.a.	n.a.	n.a.	n.a.	37.9794	820.814	0.65	120.45	21.36	9.78	0.51	215.65	3.98	n.a.	2.2	0.62	35.78	70.33	8.31	30.02	6.31	1.45	6.03	0.78	4.39	0.79	2.18	0.33	1.98	0.38
406	Awulale range	D-9	Basalt	51.02	0.8	16.21	n.a.	n.a.	9.04	0.25	5.51	9.38	3.09	1.58	0.52	2.55891	99.9589	n.a.	n.a.	n.a.	n.a.	n.a.	n.a.	65.01	637.89	1.35	373.01	24.78	12.08	0.54	237.01	4.56	n.a.	2.1	0.658	28.65	64.01	7.53	31.21	6.28	1.79	6.23	0.86	4.63	0.92	2.6	0.38	2.05	0.35
407	Awulale range	D-10	Basalt	49.37	1.04	14.98	n.a.	n.a.	9.29	0.22	6.57	10.97	3.23	1.01	0.71	2.13	99.52	n.a.	n.a.	n.a.	n.a.	n.a.	n.a.	35.36	301.38	0.99	380.14	35.89	10.88	0.51	234.12	4.2	n.a.	1.99	0.63	20.12	48.88	6.54	54.59	6.39	1.98	6.89	0.99	5.67	1.04	3.21	0.41	2.6	0.42
408	Awulale range	D-11	Basalt	49.24	0.84	16.54	n.a.	n.a.	9.14	0.87	6.34	10.23	3.04	1.37	0.81	1.20822	99.6282	n.a.	n.a.	n.a.	n.a.	n.a.	n.a.	57.64	883	0.51	345.67	27.36	14.65	0.55	268.41	4.84	n.a.	1.84	0.77	38.48	82.31	11.34	37.45	7.78	1.98	6.87	0.84	5.01	0.99	2.71	0.32	1.98	0.32
409	Awulale range	D-5	Trachy basalt	48.23	0.86	15.34	n.a.	n.a.	9.67	0.67	6.51	8.45	2.49	4.67	0.61	2.22062	99.7206	n.a.	n.a.	n.a.	n.a.	n.a.	n.a.	130.345	180.66	2.0344	1045	30.44	1.31	0.071	41.48	0.9	n.a.	2.01	0.41	28.44	50.12	7.89	30.01	6.05	1.47	5.23	0.88	5.37	0.899972	2.38	0.35	2.15	0.4
410	Awulale range	D-6	Trachy basalt	48.88	0.85	17.01	n.a.	n.a.	10.02	0.25	6.73	8.51	3.45	2.14	0.19	1.66247	99.6925	n.a.	n.a.	n.a.	n.a.	n.a.	n.a.	71.44	550.67	13.48	308.03	20.34	2.13	0.17	85.03	2.94	n.a.	1.59	0.59	7.59	20.02	2.55	12.2	3.19	1.05	3.48	0.55	3.4	0.82	2.34	0.38	1.72	0.31
411	Awulale range	D-7	Trachy basalt	49.01	0.87	17.33	n.a.	n.a.	9.78	0.31	5.75	7.21	4.04	2.01	0.62	2.85	99.78	n.a.	n.a.	n.a.	n.a.	n.a.	n.a.	61.22	638	1.65	450.05	30.5	12.87	0.31	245.98	4.84	n.a.	2.53	0.67	36.57	80.04	10.01	32.34	7.34	1.34	7.03	0.89	5.05	0.98	2.82	0.41	2.29	0.37
412	Awulale range	D-1	Basaltic andesite	54.33	0.35	13.28	n.a.	n.a.	10.57	1.22	4.55	12.56	3.24	0.32	0.14	0.18	100.74	n.a.	n.a.	n.a.	n.a.	n.a.	n.a.	53.455	129.028	n.a.	213.525	20.99	10.89	0.556	139.5	3.043	n.a.	2.25	1.03	20.88	49.61	7.094	26.94	5.755	1.088	4.892	0.673	3.804	0.752	2.22	0.311	2.033	0.284
413	Awulale range	D-2	Basaltic andesite	53.28	0.65	14.55	n.a.	n.a.	9.78	1.78	4.88	8.23	4.01	1.3	0.12	1.8	100.38	n.a.	n.a.	n.a.	n.a.	n.a.	n.a.	63.003	224.18	n.a.	316.75	23.54	5.046	0.304	166.4	3.634	n.a.	2.511	2.194	19.639	26.51	3.407	14.7	5.507	1.225	4.209	0.634	3.966	0.804	2.424	0.378	2.039	0.339
414	Awulale range	D-3	Basaltic trachy andesite	51.32	0.72	16.04	n.a.	n.a.	9.38	0.21	5.38	6.45	3.77	1.66	0.72	3.27	99.51	n.a.	n.a.	n.a.	n.a.	n.a.	n.a.	75.64	607.64	n.a.	340.22	23.34	11.34	0.574	227.35	4.31	n.a.	2.201	0.732	30.04	71.4	8.12	34.34	6.33	1.53	6.32	0.82	5	0.83	2.33	0.333	2.12	0.301
415	Awulale range	DD50	Trachyandesite	51.39	0.99	16.37	7.69	0.86	n.a.	0.39	5.2	7.58	4.1	1.79	0.42	2.9	99.68	25.3	217	161	37.4	77.9	n.a.	70.6	537	n.a.	567	20.4	12.6	0.75	186	4.31	22.3	1.69	0.47	24.5	52.8	6.45	26.1	5.2	1.78	4.76	0.66	3.81	0.74	2.07	0.28	1.84	0.26
416	Awulale range	DD48	Trachyandesite	52.2	1.6	15.3	9.57	1.07	n.a.	0.58	3.77	7.16	4.67	1.91	0.45	1.33	99.61	35.2	424	13.5	30	28	n.a.	74.9	191	n.a.	344	35.5	8.31	0.55	200	4.9	5.24	3.83	1.19	18.2	43.6	5.83	26	6.38	1.9	6.69	1.02	6.27	1.28	3.69	0.51	3.37	0.5
417	Awulale range	DD51	Trachyandesite	55.08	1.53	14.91	9.31	1.04	n.a.	0.53	3.54	4.7	5	1.8	0.43	1.55	99.42	34	402	14.5	28.5	27.4	n.a.	79.2	219	n.a.	322	34.7	7.95	0.47	193	4.14	252	3.75	1.15	17.4	42.1	5.67	25.2	6.23	1.67	6.5	1	6.18	1.25	3.63	0.5	3.31	0.48
420	Awulale range	BZ11	Basalt	49.25	1.63	15.49	4.45	1.68	n.a.	0.08	6.76	11	3.65	1	0.43	4.02	99.44	25.6	225	277	17	112	n.a.	66.9	421	n.a.	67.3	34.9	10.4	0.71	221	5.8	1.99	2.1	2.4	32.2	78	10.9	45.6	9.84	3.17	7.59	1.44	7.25	1.37	3.72	0.58	3.15	0.5
421	Awulale range	BZ10	Basalt	50.5	1.6	15.42	5.1	1.97	n.a.	0.1	7.47	8.43	3.85	1.12	0.42	3.41	99.39	25.4	216	285	22.5	150	n.a.	71.8	397	n.a.	111	29	10.2	0.72	117	2.69	1.54	2.17	0.58	20.6	43.2	5.89	25.3	5.24	1.58	4.68	0.99	5.47	1.11	2.93	0.45	2.48	0.38
422	Awulale range	BZ15	Basalt	51.01	1.83	14.63	4.7	1.99	n.a.	0.09	5.71	10.25	3.52	2.02	0.53	3.13	99.41	23.2	201	171	19.7	72.5	n.a.	114	398	n.a.	286	39.8	5.81	0.12	223	5.3	3	2.79	0.8	26.1	61.7	9.11	38.8	8.9	2.29	7.49	1.37	7.53	1.61	4.35	0.73	3.93	0.6
425	Awulale range	H-009-1	Basalt	46.53	1.43	14.44	n.a.	n.a.	9.97	0.11	6.05	10.62	3.46	1.19	0.41	5.02529	99.2353	n.a.	n.a.	n.a.	n.a.	n.a.	n.a.	39.6401	254.381	2.18361	176.789	25.0406	9.79916	0.674491	168.717	4.36438	n.a.	3.04415	1.10218	21.2978	47.7385	6.87664	28.8621	5.96447	1.67428	6.30373	1.00099	5.75424	1.20725	3.22452	0.446824	2.93864	0.440846
426	Awulale range	H-009-6	Basalt	47.55	1.31	17.29	n.a.	n.a.	9.91	0.12	5.47	9.62	2.91	1.34	0.65	3.34051	99.5105	n.a.	n.a.	n.a.	n.a.	n.a.	n.a.	53.243	607.742	2.09439	271.426	25.5783	9.74127	0.562555	156.999	4.0089	n.a.	2.16427	0.79566	24.5978	55.4485	8.13862	34.3316	6.83008	2.3611	7.10904	1.06767	5.96667	1.2497	3.2479	0.438027	2.78447	0.408852
427	Awulale range	H-009-3	Basalt	49.07	1.07	15.63	n.a.	n.a.	12.88	0.14	5.71	6.66	3.23	1.46	0.36	3.35738	99.5674	n.a.	n.a.	n.a.	n.a.	n.a.	n.a.	56.2857	544.764	1.96162	217.594	17.9572	8.47044	0.517396	141.515	3.7239	n.a.	2.77509	1.02126	19.5507	42.3964	6.1096	25.026	4.85793	1.50905	4.89972	0.741849	4.14055	0.873759	2.27988	0.31881	2.09247	0.30602
428	Awulale range	H-309-15	Basalt	49.17	1.31	16.22	n.a.	n.a.	10.94	0.1	5.06	8.13	3.11	1.58	0.5	2.24582	98.3658	n.a.	n.a.	n.a.	n.a.	n.a.	n.a.	73.69	694.2	1.79	183.2	14.39	9.09	0.43	168.9	2.93	n.a.	0.76	0.58	13.25	36.77	4.37	19.3	4.17	1.32	3.99	0.58	3.27	0.67	1.9	0.26	1.5	0.25
429	Awulale range	H-II-1	Basalt	50.17	0.7	14.56	n.a.	n.a.	6.33	0.16	7.04	15.51	3.11	0.23	0.18	1.99318	99.9832	n.a.	n.a.	n.a.	n.a.	n.a.	n.a.	15.3638	525.693	0.783523	38.7586	22.6384	5.09783	0.35814	107.421	3.24077	n.a.	8.27894	8.70816	19.715	43.4406	6.3639	26.128	5.43191	1.29983	5.55361	0.849264	4.76345	1.0175	2.75412	0.389345	2.54482	0.380927
430	Awulale range	H-809-19	Trachy basalt	48.28	1.49	14.81	n.a.	n.a.	9.95	0.07	5.93	8.36	4.21	1.31	0.4	4	98.81	n.a.	n.a.	n.a.	n.a.	n.a.	n.a.	63.76	461.7	0.86	210.5	23.15	10.26	0.56	210.2	3.87	n.a.	2.03	0.55	11.81	25.1	3.04	13.79	3.56	0.97	4	0.65	3.89	0.82	2.41	0.35	2.05	0.36
431	Awulale range	H-809-13	Trachy basalt	48.4	1.72	15.54	n.a.	n.a.	9.06	0.11	4.42	9.76	3.19	1.95	0.69	3.75817	98.5982	n.a.	n.a.	n.a.	n.a.	n.a.	n.a.	84.67	1143	0.61	286.8	23.01	11.48	0.56	199.3	3.89	n.a.	3.21	0.85	32.43	76.16	9.71	39.63	7.43	2.25	6.92	0.87	4.45	0.86	2.37	0.32	1.8	0.29
432	Awulale range	H-1202-7	Trachy basalt	49.08	1.44	15.99	n.a.	n.a.	10.77	0.12	6.1	6.73	3.54	1.7	0.67	3.45976	99.5998	n.a.	n.a.	n.a.	n.a.	n.a.	n.a.	68.4	673.7	1.62	280.8	20.55	10.57	0.46	181	3.17	n.a.	0.69	0.51	20.22	50.29	6.07	26.29	5.41	1.71	5.26	0.74	4	0.79	2.23	0.3	1.68	0.27
433	Awulale range	H-009-7	Trachy basalt	50.3	1.4	16.28	n.a.	n.a.	9.78	0.13	4.86	8.17	4.19	1.27	0.54	2.25548	99.1755	n.a.	n.a.	n.a.	n.a.	n.a.	n.a.	4.32542	95.6435	0.334505	14.8305	17.6571	2.45744	0.31834	54.8089	1.70426	n.a.	8.82844	3.3763	18.5973	39.995	5.03661	17.8892	3.42687	0.538034	3.64992	0.589241	3.50039	0.779963	2.20483	0.324473	2.1793	0.336525
434	Awulale range	H-BZZr-1	Basaltic andesite	50.15	1.63	15.8	n.a.	n.a.	9.31	0.13	4.41	7.01	3.85	1.09	0.62	4.59535	98.5954	n.a.	n.a.	n.a.	n.a.	n.a.	n.a.	31.2	859.3	1.58	284.4	24.75	15.79	0.75	209.6	3.64	n.a.	1.62	0.57	25.26	56.62	7.11	29.4	5.95	1.97	5.77	0.8	4.32	0.86	2.4	0.34	1.92	0.31
435	Awulale range	H-704-3	Basaltic andesite	51.29	0.76	14.13	n.a.	n.a.	7.51	0.09	7.25	10.87	2.3	2.55	0.18	1.85407	98.7841	n.a.	n.a.	n.a.	n.a.	n.a.	n.a.	99.63	641.5	0.84	605.4	19.6	3.23	0.19	86.1	1.94	n.a.	2.56	2.68	8.21	18.82	2.34	10.79	2.9	1.28	3.32	0.55	3.39	0.73	2.1	0.3	1.66	0.27
436	Awulale range	H-007-11	Basaltic andesite	51.51	1.15	16.19	n.a.	n.a.	8.69	0.12	5.27	8.75	3.25	1.2	0.39	3.00577	99.5258	n.a.	n.a.	n.a.	n.a.	n.a.	n.a.	57.8031	617.929	3.10813	199.045	19.6689	9.37906	0.593277	163.973	4.34437	n.a.	3.17595	1.08593	22.3079	47.773	6.63069	26.9045	5.1797	1.69041	5.33511	0.822148	4.5248	0.95555	2.51572	0.354086	2.28812	0.352482
437	Awulale range	H-II-2	Basaltic andesite	51.8	0.7	11.68	n.a.	n.a.	9.13	0.18	11.12	10.21	2.72	0.44	0.17	1.95138	100.101	n.a.	n.a.	n.a.	n.a.	n.a.	n.a.	16.3473	341.441	0.39364	73.3066	17.044	3.51482	0.270489	95.4256	2.90746	n.a.	7.57434	2.72331	15.6222	29.4925	4.28897	18.3731	4.12828	1.10216	4.16761	0.653461	3.73168	0.804715	2.22249	0.321156	2.11594	0.316945
438	Awulale range	H-007-1	Basaltic trachy andesite	51.9	1.06	15.25	n.a.	n.a.	8.51	0.09	4.41	8.58	5.25	0.93	0.31	3.31141	99.6014	n.a.	n.a.	n.a.	n.a.	n.a.	n.a.	55.3366	316.909	1.70228	127.675	19.6481	4.99951	0.408828	147.808	4.08902	n.a.	6.23824	2.18587	23.623	50.1891	6.70845	26.0761	4.69219	1.2023	4.89896	0.764607	4.29321	0.923686	2.48096	0.355021	2.34754	0.353049
439	Awulale range	H-309-5	Basaltic trachy andesite	50.54	1.54	15.7	n.a.	n.a.	9.29	0.07	6.14	6.99	4.68	1.17	0.44	2.89431	99.4543	n.a.	n.a.	n.a.	n.a.	n.a.	n.a.	52.98	454.4	1.11	246.2	26.74	10.23	0.53	200.4	3.58	n.a.	1.89	0.79	19.52	43.8	5.33	22.93	5.08	1.54	5.3	0.79	4.55	0.94	2.66	0.38	2.15	0.34
440	Awulale range	H-309-17	Basaltic trachy andesite	50.69	1.14	15.32	n.a.	n.a.	7.67	0.13	5.32	9.44	3.48	2.32	0.52	3.16762	99.1976	n.a.	n.a.	n.a.	n.a.	n.a.	n.a.	142.3	467.7	1.11	385.8	18.55	9.1	0.35	222	3.8	n.a.	1.17	0.93	23.21	59.74	6.69	27.62	5.38	1.42	5.15	0.7	3.75	0.75	2.12	0.29	1.6	0.27
441	Awulale range	H-809-2	Basaltic trachy andesite	53.48	2.46	14.59	n.a.	n.a.	10.78	0.16	3.5	5.27	3.12	2.4	0.59	3.85631	100.206	n.a.	n.a.	n.a.	n.a.	n.a.	n.a.	90.19	314.3	2.44	331.3	43.51	7.49	0.57	245.5	5.35	n.a.	5.73	1.77	18.85	44.1	6.11	28.49	7.32	2.32	8.46	1.35	7.99	1.65	4.68	0.66	3.81	0.6
442	Awulale range	H-809-4	Basaltic trachy andesite	53.68	2.31	14.5	n.a.	n.a.	9.85	0.07	4.37	4.83	4.99	1.95	0.5	2.67593	99.7259	n.a.	n.a.	n.a.	n.a.	n.a.	n.a.	139	167.9	11.82	162.8	45.93	7.66	0.57	250.2	5.39	n.a.	5.8	2.1	17.84	43.98	5.74	26.68	6.83	1.99	8.08	1.35	8.2	1.69	4.75	0.67	3.85	0.6
443	Awulale range	H-704-10	Trachy andesite	52.81	0.99	15.66	n.a.	n.a.	9.06	0.13	4.51	5.37	4.46	2.98	0.33	1.85889	98.1589	n.a.	n.a.	n.a.	n.a.	n.a.	n.a.	95.5	387.3	1.05	232.3	15.4	7.57	0.36	133.5	2.53	n.a.	1.23	0.4	19.77	40.25	4.86	19.83	3.76	1.21	3.71	0.5	2.69	0.54	1.51	0.21	1.18	0.19
444	Awulale range	H-309-11	Trachy andesite	55.56	1.79	15.08	n.a.	n.a.	4.44	0.05	4.81	7.65	5.63	1.66	0.41	1.88606	98.9661	n.a.	n.a.	n.a.	n.a.	n.a.	n.a.	76.68	365.8	0.4	339.1	44.98	10.74	0.72	283.7	5.68	n.a.	8.93	2.59	17.52	49.23	6.62	29.66	7.28	2.49	8.03	1.29	7.69	1.59	4.53	0.65	3.7	0.57
445	Awulale range	H-809-15	Trachy andesite	52.7	1.48	16.66	n.a.	n.a.	5.45	0.07	5.4	7.73	4.83	1.87	0.63	2.62281	99.4428	n.a.	n.a.	n.a.	n.a.	n.a.	n.a.	138.8	521.5	1.37	169.3	22.89	10.92	0.51	211.3	4	n.a.	1.93	0.66	19.44	51.99	6.58	27.94	5.51	1.51	5.47	0.76	4.14	0.84	2.37	0.33	1.89	0.32
446	Awulale range	H-309-13	Trachy andesite	54.87	1.94	14.87	n.a.	n.a.	5.94	0.09	4.29	7.71	5.62	1.57	0.47	2.41798	99.788	n.a.	n.a.	n.a.	n.a.	n.a.	n.a.	66.65	366.3	0.43	272.5	49.44	7.52	0.5	250.1	4.73	n.a.	4	1.42	20.38	49.08	6.13	28.03	7.23	2.34	8.41	1.35	8.08	1.68	4.71	0.67	3.74	0.59
447	Awulale range	13ZB44	Dolerite	46.7	1.92	16.28	1.99	n.a.	10.46	0.22	6.43	8.63	4.19	0.65	0.5	1.97	99.94	34.2	300	127	50.2	88.1	18.5	18.3	538	2.79	143	35.2	6.89	0.44	160	4.32	n.a.	0.68	0.4	15.6	39.6	5.65	25.2	6.12	1.97	6.14	1.03	6.31	1.3	3.85	0.52	3.34	0.51
448	Awulale range	13ZB82	Dolerite	46.05	1.59	16.54	2.1	n.a.	10.13	0.15	5.84	11.46	2.99	0.41	0.5	1.58	99.34	31.6	246	112	42.5	82	18.1	10.7	475	1.52	90	30.1	6.88	0.43	137	3.59	n.a.	0.69	0.42	14.8	35.7	5.15	22.3	5.51	1.9	5.33	0.87	5.36	1.08	3.29	0.43	2.83	0.41
449	Awulale range	LZB16	Basalt	52.69	0.99	15.68	2.64	n.a.	6.52	0.28	6.14	8.81	2.66	0.9	0.33	1.43	99.07	21.9	232	265	33.2	86.4	16.9	21.1	484	2.48	471	22.4	4.59	0.32	105	3.02	n.a.	2.27	0.7	16.1	36.8	5.03	23	4.85	1.39	4.92	0.76	4.58	0.93	2.51	0.38	2.55	0.38
450	Awulale range	LZB05	Basalt	48.57	0.98	16.53	3.29	n.a.	7.55	0.35	6.78	8.43	3.25	1.04	0.23	2.14	99.14	28.7	292	115	36.7	42.1	15.9	47.6	508	4.06	178	22.2	3	0.21	75.3	2.11	n.a.	1.36	0.42	9.07	22.6	3.04	15.3	3.71	1.1	3.86	0.67	4.24	0.85	2.33	0.36	2.37	0.35
451	Awulale range	LZB10	Basalt	49.94	0.89	13.34	1.63	n.a.	8.33	0.38	8.62	10.77	2.87	0.32	0.24	1.74	99.07	36.5	133	503	41.2	134	14.1	9.91	450	2.85	175	23	3.2	0.22	75.4	2.02	n.a.	2.17	0.72	12.6	29.2	3.95	18.6	4.1	1.13	4.18	0.64	4.09	0.85	2.34	0.36	2.3	0.37
452	Awulale range	LZB12	Basalt	48.86	0.96	14.4	2.5	n.a.	8.05	0.26	9.25	9.91	2.43	1.02	0.26	1.17	99.07	40.4	245	593	45.3	146	16.8	36.5	474	9.63	395	25.8	3.6	0.25	85.8	2.43	n.a.	2.5	0.72	14.2	31.9	4.32	20.4	4.51	1.32	4.66	0.75	4.71	0.96	2.52	0.4	2.68	0.41
453	Awulale range	ZBW13–3	Basaltic andesite	51.45	1.19	17.03	3.47	n.a.	6.47	0.16	4.32	7.94	4.65	0.79	0.41	1.02	98.9	16.2	224	80.7	27.9	43.7	19	30	664	1.65	162	22	6.37	0.4	206	5.3	n.a.	6.4	2.49	27.6	63.8	8.01	35.1	6.43	1.68	5.63	0.79	4.31	0.8	2.26	0.31	2.11	0.33
471	Awulale range	F90	Basalt	50.0091	0.875506	17.4415	n.a.	n.a.	9.75249	0.193494	5.9747	10.8337	2.1505	1.12788	0.18652	1.3	99.8454	n.a.	n.a.	n.a.	n.a.	n.a.	n.a.	13.3301	474.094	n.a.	186.93	15.1904	1.81358	0.15216	49.5219	1.43463	n.a.	1.27729	0.479286	9.10131	20.6723	2.82718	11.2818	2.67253	0.934392	2.79066	0.500903	3.00843	0.619056	1.77231	0.261871	1.72703	0.261007
472	Awulale range	F91	Basalt	50.9161	0.912306	17.5715	n.a.	n.a.	9.9879	0.210052	5.72971	5.98446	4.17101	0.983855	0.188114	3.15	99.805	n.a.	n.a.	n.a.	n.a.	n.a.	n.a.	21.3291	564.951	n.a.	279.946	14.609	1.80002	0.15336	48.6565	1.46062	n.a.	1.30295	0.474165	8.14474	18.8755	2.61543	10.321	2.49076	0.797482	2.62375	0.478745	2.90385	0.600748	1.73202	0.257394	1.68731	0.255729
473	Awulale range	F93	Basalt	49.7244	0.893061	17.2607	n.a.	n.a.	10.0126	0.207833	7.00444	8.876	2.15387	0.713382	0.152501	2.85	99.8488	n.a.	n.a.	n.a.	n.a.	n.a.	n.a.	20.7763	483.785	n.a.	156.301	13.8147	1.88371	0.149146	50.9559	1.51191	n.a.	1.2007	0.442037	8.09645	18.1787	2.52649	9.7779	2.34848	0.829695	2.48847	0.447298	2.71291	0.564406	1.61759	0.237195	1.56408	0.236015
474	Awulale range	16F-19	Basalt	48.7996	0.878158	17.0818	n.a.	n.a.	9.35809	0.195606	7.23523	8.2951	3.17621	1.51731	0.208118	3.08	99.8252	n.a.	n.a.	n.a.	n.a.	n.a.	n.a.	40.6553	362.418	n.a.	300.05	11.5978	1.84124	0.159316	52.8867	1.55428	n.a.	2.14363	0.67806	8.67373	19.2932	2.59206	9.89044	2.26462	0.742679	2.31301	0.40984	2.42036	0.494295	1.4183	0.207143	1.39188	0.214709
475	Awulale range	16F-21	Basalt	49.3659	0.825994	17.1188	n.a.	n.a.	9.63092	0.245634	6.89395	7.75287	2.86995	1.46047	0.182323	3.5	99.8468	n.a.	n.a.	n.a.	n.a.	n.a.	n.a.	50.4823	543.83	n.a.	250.594	14.3838	1.6123	0.157818	48.4293	1.43109	n.a.	1.21997	0.457999	8.42715	19.3566	2.64993	10.664	2.51306	0.746777	2.63424	0.475093	2.86224	0.594522	1.71009	0.247766	1.61264	0.24465
476	Awulale range	16F-29	Basalt	49.1951	0.835148	17.3321	n.a.	n.a.	10.1587	0.219139	6.26031	10.5847	2.0691	0.837471	0.190482	2.19	99.8722	n.a.	n.a.	n.a.	n.a.	n.a.	n.a.	7.02773	481.19	n.a.	149.625	14.7861	1.59379	0.143932	46.5935	1.40249	n.a.	1.23276	0.454421	9.02413	20.4651	2.76973	11.1386	2.63201	0.904383	2.73863	0.488572	2.93467	0.60888	1.73897	0.255698	1.6761	0.255369
477	Awulale range	16F-30	Basalt	48.9087	0.845311	17.2191	n.a.	n.a.	10.1846	0.234962	6.23793	10.439	2.12074	0.868124	0.197415	2.61	99.866	n.a.	n.a.	n.a.	n.a.	n.a.	n.a.	7.29871	472.987	n.a.	153.556	14.9339	1.5214	0.146261	46.4521	1.37174	n.a.	1.23624	0.446149	9.09398	20.4555	2.78057	11.2882	2.6561	0.871214	2.76207	0.491158	2.94516	0.612959	1.75264	0.258908	1.70334	0.259845
478	Awulale range	16F-38	Trachy andesite	53.7161	0.921792	17.5537	n.a.	n.a.	8.11065	0.509422	2.98976	3.22116	6.18899	3.43704	0.463222	2.7	99.8118	n.a.	n.a.	n.a.	n.a.	n.a.	n.a.	89.5004	638.819	n.a.	1432.71	21.5763	5.12413	0.335407	130.1	3.58241	n.a.	5.72555	1.88943	20.4065	41.3405	5.17988	22.508	4.98569	1.68981	4.41419	0.806888	4.55051	0.969163	2.52923	0.382054	2.40462	0.350807
479	Awulale range	16F-39	Trachy andesite	52.6979	0.915739	17.5618	n.a.	n.a.	8.35532	0.521147	3.66698	2.93092	6.33554	3.26465	0.462369	3.09	99.8023	n.a.	n.a.	n.a.	n.a.	n.a.	n.a.	86.988	629.022	n.a.	1501.23	21.6838	4.85223	0.386415	137.472	3.71968	n.a.	5.94728	1.89611	19.0363	40.5398	5.16872	22.1322	5.02391	1.62958	4.41971	0.802461	4.63062	0.982259	2.54154	0.385484	2.45618	0.35347
480	Awulale range	16F-40	Trachy andesite	50.9134	0.70076	20.172	n.a.	n.a.	6.96089	0.401145	3.72043	5.83124	4.76938	3.15897	0.428254	2.75	99.8064	n.a.	n.a.	n.a.	n.a.	n.a.	n.a.	146.092	364.959	n.a.	343.176	22.8005	4.2649	0.327273	105.778	2.93085	n.a.	6.39421	1.89798	18.3934	41.9187	5.72418	25.1582	5.51611	1.67875	5.19494	0.849398	4.74385	0.946207	2.64265	0.387118	2.52729	0.383233
481	Awulale range	16F-41	Trachy andesite	n.a.	n.a.	n.a.	n.a.	n.a.	n.a.	n.a.	n.a.	n.a.	n.a.	n.a.	n.a.	n.a.	n.a.	n.a.	n.a.	n.a.	n.a.	n.a.	n.a.	209.575	568.812	n.a.	480.508	23.0832	4.26844	0.330787	102.298	2.79435	n.a.	6.15815	1.74	22.233	47.6368	6.00229	26.204	6.05366	1.74954	5.25615	0.855216	4.70045	0.942483	2.63563	0.386354	2.51521	0.381197
482	Awulale range	16F-42	Trachy andesite	52.8674	0.681184	20.2178	n.a.	n.a.	6.28798	0.21595	2.07368	6.48326	3.23874	5.13893	0.460555	2.1	99.7655	n.a.	n.a.	n.a.	n.a.	n.a.	n.a.	178.264	900.573	n.a.	747.984	18.9124	5.82854	0.330787	139.044	3.61648	n.a.	11.7984	3.05233	27.4853	55.4514	6.54852	26.4048	5.52594	1.61988	4.59147	0.710164	3.78283	0.748823	2.11063	0.311884	2.0649	0.315786
483	Awulale range	16F-43	Trachy andesite	52.408	0.714694	20.268	n.a.	n.a.	6.30754	0.271898	2.26296	5.9085	4.41017	4.25789	0.460176	2.56	99.8299	n.a.	n.a.	n.a.	n.a.	n.a.	n.a.	n.a.	n.a.	n.a.	n.a.	n.a.	n.a.	n.a.	n.a.	n.a.	n.a.	n.a.	n.a.	n.a.	n.a.	n.a.	n.a.	n.a.	n.a.	n.a.	n.a.	n.a.	n.a.	n.a.	n.a.	n.a.	n.a.
484	Awulale range	F94	Trachy andesite	53.2485	0.720889	19.5227	n.a.	n.a.	5.67223	0.237155	2.9565	4.89248	4.11592	5.09677	0.492841	2.82	99.776	n.a.	n.a.	n.a.	n.a.	n.a.	n.a.	n.a.	n.a.	n.a.	n.a.	n.a.	n.a.	n.a.	n.a.	n.a.	n.a.	n.a.	n.a.	n.a.	n.a.	n.a.	n.a.	n.a.	n.a.	n.a.	n.a.	n.a.	n.a.	n.a.	n.a.	n.a.	n.a.
485	Awulale range	F95	Trachy andesite	52.7636	0.726466	20.0965	n.a.	n.a.	6.3998	0.187218	3.00675	5.5055	3.27618	5.08295	0.50053	2.28	99.8255	n.a.	n.a.	n.a.	n.a.	n.a.	n.a.	203.625	535.292	n.a.	685.457	21.0566	6.97422	0.382045	165.469	4.25947	n.a.	13.6468	3.19209	28.2181	58.7422	7.83438	28.3041	6.11104	1.61101	5.0166	0.776046	4.18262	0.822406	2.33982	0.341385	2.26636	0.346698
486	Awulale range	F97	Trachy andesite	51.7365	0.789825	19.4776	n.a.	n.a.	7.73823	0.417136	3.40677	3.67173	3.01163	5.74092	0.486213	3.29	99.7666	n.a.	n.a.	n.a.	n.a.	n.a.	n.a.	260.092	615.258	n.a.	1045.91	21.5084	7.17732	0.417868	162.328	4.2209	n.a.	13.5871	3.33808	23.9561	49.4916	6.05061	24.0842	5.4444	1.84799	4.74132	0.757652	4.18771	0.824233	2.33612	0.341339	2.26346	0.344335
487	Awulale range	16F-57	Trachy andesite	55.2511	0.985289	17.4695	n.a.	n.a.	8.50629	0.183695	2.61732	1.86738	2.56685	7.90658	0.71395	1.71	99.7779	n.a.	n.a.	n.a.	n.a.	n.a.	n.a.	n.a.	n.a.	n.a.	n.a.	n.a.	n.a.	n.a.	n.a.	n.a.	n.a.	n.a.	n.a.	n.a.	n.a.	n.a.	n.a.	n.a.	n.a.	n.a.	n.a.	n.a.	n.a.	n.a.	n.a.	n.a.	n.a.
488	Awulale range	16F-58	Trachy andesite	54.6138	0.790544	18.164	n.a.	n.a.	7.97776	0.18919	2.71847	3.27295	2.12858	7.45012	0.58021	1.93	99.8156	n.a.	n.a.	n.a.	n.a.	n.a.	n.a.	267.838	347.088	n.a.	579.342	21.3994	6.83093	0.454758	160.527	4.18113	n.a.	13.4483	2.41266	22.2717	46.6719	5.76794	24.1227	5.95424	1.53065	5.00825	0.808824	4.3499	0.85636	2.40357	0.355029	2.32231	0.356892
489	Awulale range	F99	Trachyte	58.4508	1.02275	15.7307	n.a.	n.a.	10.2145	0.173974	1.53815	0.991076	1.12714	8.62231	0.515847	1.5	99.8872	n.a.	n.a.	n.a.	n.a.	n.a.	n.a.	411.74	98.8683	n.a.	665.295	33.619	11.7943	0.579723	235.258	6.94019	n.a.	18.9869	5.1968	39.4411	74.406	10.1232	37.3737	8.17228	1.46837	7.04427	1.15828	6.52656	1.33054	3.8651	0.575963	3.818	0.582127
490	Awulale range	F100	Trachyte	58.9024	1.09273	15.1723	n.a.	n.a.	10.181	0.13393	0.983974	1.2176	0.999571	9.59957	0.536419	1.04	99.8594	n.a.	n.a.	n.a.	n.a.	n.a.	n.a.	424.657	91.5775	n.a.	929.323	36.2628	13.051	0.799592	257.935	7.75182	n.a.	20.8626	5.7522	40.6049	83.9847	11.3096	46.0359	9.04862	1.59416	7.69728	1.26204	7.11788	1.44953	4.22399	0.634653	4.18774	0.641838
491	Awulale range	F102	Trachyte	58.8069	1.04643	16.2926	n.a.	n.a.	7.58251	0.156732	1.31393	2.13406	4.12304	6.53921	0.51685	1.35	99.8622	n.a.	n.a.	n.a.	n.a.	n.a.	n.a.	269.429	141.487	n.a.	737.145	33.9452	12.098	0.789893	241.694	7.12422	n.a.	19.5122	5.09173	40.1675	80.8251	10.755	40.408	8.67078	1.8435	7.35608	1.19342	6.74162	1.36053	3.94042	0.583768	3.87841	0.592523
Intermediate-acid rocks
1	Yilianhabierga range	HX19	Granodiorite	69.52	0.48	15.21	1.99	0.82	n.a.	0.05	0.97	2.39	3.76	4	0.13	0.81	100.13	6.14	37.5	13.5	6.05	6.74	20.4	189	238	10.5	511	32.5	15.2	1.8	260	7.24	22.3	17.4	3.13	38.1	79	8.85	33.3	6.63	1.12	6.38	1.14	6.23	1.31	3.91	0.53	3.37	0.5
2	Yilianhabierga range	HX20	Granodiorite	67.99	0.52	14.75	1.81	1.22	n.a.	0.05	1.14	2.52	3.57	3.96	0.14	1	98.67	7.4	35.3	10.1	5.65	5.77	20.8	153	255	6.49	478	35	15.6	1.83	274	7.21	24	18.9	5.76	45.2	88.6	10.5	37.1	7.69	1.28	6.94	1.26	6.9	1.35	4.41	0.54	3.82	0.54
3	Yilianhabierga range	HX21	Granodiorite	69.25	0.47	14.9	2.03	0.76	n.a.	0.04	0.99	2.27	3.64	3.95	0.13	1.18	99.61	6.94	38.1	9.21	6.21	6.05	20.6	164	257	8.02	492	36	16.5	2.05	251	6.77	23.4	17.4	5.19	39	77.4	9.55	35.7	7.4	1.21	6.98	1.24	7	1.37	4.4	0.57	3.67	0.56
4	Yilianhabierga range	HX22	Granodiorite	68.44	0.48	14.73	1.89	0.99	n.a.	0.05	1.03	2.29	3.58	4.11	0.13	1.46	99.18	7.64	36.3	10.2	5.72	5.95	20.2	160	260	7.67	520	34.6	15.8	1.92	238	6.25	24	18.6	5.26	41.8	80.7	9.8	36.2	7.44	1.1	7.04	1.2	6.93	1.37	4.18	0.57	3.49	0.54
5	Awulale range	WLDB-1	Granite porphyry	71.04	0.2	15.26	0.81	1.2	n.a.	0.04	0.88	1.03	5.62	2.9	0.07	1.2	100.25	7.28	27.6	9.98	5.13	21.5	18.9	32.5	204	0.63	414	5.47	4.82	0.41	84.3	2.53	1.39	1.91	0.9	12.5	19.8	2.52	8.61	1.48	0.45	1.16	0.19	1.01	0.2	0.6	0.09	0.61	0.09
6	Awulale range	WLDB-2	Granite porphyry	71.83	0.2	15.45	0.99	0.94	n.a.	0.04	0.82	0.88	6.91	1.4	0.07	0.97	100.5	7.4	28.6	9.93	5.37	21.3	19.7	17.1	134	0.26	184	5.16	5.14	0.41	87.3	2.73	0.5	1.88	0.6	14.2	18.6	2.73	9.25	1.53	0.48	1.14	0.19	0.95	0.19	0.56	0.08	0.58	0.09
7	Awulale range	WLDB-3	Granite porphyry	71.49	0.2	15.36	1.1	0.79	n.a.	0.04	0.81	0.98	6.37	2.04	0.07	0.88	100.13	7.05	26.5	7.3	4.7	18	18.9	26.8	200	0.43	284	5.55	5.01	0.44	84.6	2.74	2.44	2.09	0.73	16.5	24.6	3.1	10.4	1.73	0.5	1.37	0.21	1.01	0.21	0.63	0.09	0.58	0.09
8	Awulale range	WLDB-4	Granite porphyry	71.16	0.2	15.39	0.7	1.17	n.a.	0.04	0.75	1.46	5.36	2.91	0.07	0.83	100.04	6.82	27.8	6.33	4.6	19.5	19.9	35	300	0.87	664	5.95	5.22	0.43	85.5	2.59	2.97	1.97	0.85	14.3	22.6	2.72	9.37	1.6	0.49	1.29	0.21	1.06	0.22	0.65	0.09	0.6	0.1
9	Awulale range	WLDB-5	Granite porphyry	70.55	0.21	15.5	0.56	1.54	n.a.	0.06	0.91	0.59	5.73	3.23	0.07	0.98	99.93	6.68	30.5	7.54	5.37	18.7	19.6	42.3	103	0.5	720	5.49	5.04	0.42	88.2	2.69	0.5	1.77	0.86	12.9	17	2.55	8.48	1.51	0.47	1.2	0.19	1	0.21	0.62	0.09	0.52	0.08
10	Awulale range	WLDB-6	Granite porphyry	71.42	0.19	15.56	0.86	1	n.a.	0.04	0.78	0.92	5.51	3.21	0.07	0.75	100.31	6.57	25.5	10.4	4.34	19.2	18.5	38.4	230	0.78	829	5.34	5.08	0.46	86	2.75	3.03	1.94	0.9	14.5	21	2.81	9.62	1.64	0.48	1.26	0.19	1	0.2	0.58	0.08	0.58	0.09
11	Awulale range	WLDB-7	Granite porphyry	70.49	0.22	15.58	0.7	1.34	n.a.	0.04	0.93	0.86	6.01	2.75	0.1	0.96	99.98	7.4	31.1	7.81	5.25	17.3	18.3	32.1	205	0.66	684	6.65	5.21	0.46	91.3	2.85	1.43	2.18	0.78	21	28.8	3.8	12.8	2.12	0.57	1.72	0.27	1.3	0.25	0.75	0.1	0.66	0.1
12	Hanjiga range	XK2-1	Monzogranites	70.63	0.38	15.74	1.19	0.7	n.a.	0.02	1.02	1.72	3.04	3.83	0.09	1.34	99.7	5.5	31	13.1	3.7	7.4	19.5	104	447	6.7	572	8.5	5.5	0.43	151	4.72	n.a.	9.8	2	25.3	48.6	5.5	20	3.26	0.86	2.7	0.36	1.66	0.29	0.81	0.11	0.72	0.1
13	Hanjiga range	XK2-2	Monzogranites	70.88	0.36	15.66	1.11	0.56	n.a.	0.02	0.92	1.33	3.14	4.12	0.08	1.55	99.73	5	29	9.4	4	5.7	18.6	113	385	5.7	511	7.5	5	0.41	151	4.88	n.a.	6.5	2.1	18.5	35.2	4	14.8	2.73	0.78	2.19	0.31	1.4	0.26	0.67	0.09	0.62	0.09
14	Hanjiga range	XK8-2	Monzogranites	71.2	0.37	15.4	1.78	0.01	n.a.	0.01	0.99	1.71	3.07	3.49	0.08	1.66	99.77	5.3	29.4	11.7	5.2	8.4	18	89	419	5.6	449	8.4	5.2	0.38	134	4.09	n.a.	5.6	2.1	17.6	34.4	3.9	14.3	2.63	0.75	2.18	0.32	1.57	0.29	0.77	0.12	0.72	0.11
15	Hanjiga range	XK9-1	Monzogranites	71.12	0.32	15.27	1.26	0.43	n.a.	0.01	0.77	1.74	3.15	3.63	0.07	1.94	99.71	4.6	24.5	6.6	3.9	4.8	17.4	89	390	6.4	466	7.4	5	0.39	141	4.33	n.a.	5.4	1.2	16.8	32.6	3.7	13.8	2.42	0.7	2	0.28	1.27	0.24	0.63	0.1	0.6	0.08
16	Hanjiga range	XK10-1	Monzogranites	71.29	0.31	15.49	0.76	0.4	n.a.	0.01	0.8	1.34	2.83	4.7	0.07	1.81	99.81	4.8	25.4	7.5	3.8	6.4	17.4	113	363	8.5	483	7.4	4.4	0.38	132	3.95	n.a.	5.6	1.7	14.9	27.8	3	11.3	2	0.74	1.74	0.26	1.25	0.24	0.69	0.11	0.67	0.1
17	Hanjiga range	XK11-1	Monzogranites	70.95	0.38	15.98	1.11	0.65	n.a.	0.01	1	2.24	3.39	3.12	0.09	1.03	99.95	5.6	36.5	12.2	3.8	8.9	20.3	86	527	8.6	411	7.7	5.5	0.39	158	4.7	n.a.	5.6	1.3	16.9	32.5	3.7	13.4	2.42	0.75	2.03	0.29	1.4	0.27	0.71	0.11	0.67	0.1
18	Hanjiga range	XK12-1	Monzogranites	70.95	0.35	16.01	1.35	0.58	n.a.	0.01	0.92	1.33	3.32	3.35	0.08	1.5	99.75	5.1	30.3	12.8	4.8	6.9	19.1	97	402	7.9	415	7.6	5.1	0.41	149	4.57	n.a.	5.7	1.4	16	31.3	3.7	13.5	2.42	0.73	1.97	0.3	1.47	0.26	0.7	0.1	0.69	0.09
19	Hanjiga range	XK12-2	Monzogranites	71.46	0.35	15.6	1.14	0.52	n.a.	0.01	0.92	1.89	3.18	3.39	0.08	1.21	99.75	5.3	30.3	11	4	11.2	18.4	94	490	6.5	406	7.6	4.8	0.36	159	4.73	n.a.	6	1.7	16.2	31.2	3.6	13.2	2.42	0.75	2.02	0.29	1.41	0.26	0.69	0.1	0.69	0.09
20	Hanjiga range	XK13-1	Monzogranites	71.32	0.36	15.57	0.87	0.75	n.a.	0.02	1	1.61	2.95	4.02	0.09	1.14	99.7	5.3	32.2	11.7	4.1	6.9	18.3	100	487	6.8	458	7.8	4.1	0.3	141	4.14	n.a.	6.2	1.9	17.6	34.2	3.9	14.5	2.63	0.75	2.13	0.31	1.37	0.26	0.72	0.1	0.65	0.09
21	Hanjiga range	XK13-2	Monzogranites	70.56	0.36	15.91	1.33	0.48	n.a.	0.02	0.93	1.93	3.15	3.65	0.09	1.32	99.73	5.4	32.9	11.7	8.8	8.1	19	97	457	7.9	473	7.9	5	0.39	158	4.88	n.a.	6.2	2.4	16.4	32.4	3.7	13.7	2.42	0.75	2.11	0.29	1.42	0.26	0.72	0.1	0.67	0.09
22	Hanjiga range	XK14-1	Monzogranites	71.35	0.38	15.83	1.14	0.51	n.a.	0.02	0.91	1.95	3.34	3.26	0.08	1.09	99.86	5.2	32.3	7.4	4.4	6.2	18.4	91	577	6.3	446	7.8	4.9	0.36	146	4.5	n.a.	5.2	1.3	16.4	31.7	3.7	14.2	2.63	0.79	2.06	0.3	1.48	0.26	0.73	0.11	0.61	0.09
23	Hanjiga range	XK14-2	Monzogranites	70.57	0.37	15.9	1.26	0.65	n.a.	0.02	0.99	2.04	3.19	3.43	0.08	1.3	99.8	5.4	34.4	11.9	4.6	7.8	18.7	99	526	7	496	7.9	5	0.41	154	4.61	n.a.	6.3	1.5	19.2	37	4.1	14.9	2.63	0.76	2.18	0.31	1.43	0.27	0.74	0.1	0.62	0.09
24	Hanjiga range	XK15-1	Monzogranites	70.63	0.35	15.61	1.14	0.82	n.a.	0.01	0.92	1.61	3.13	3.68	0.08	1.78	99.76	5.3	32.2	13.1	5.8	7.7	18.9	104	379	7	469	7.7	5.2	0.47	142	4.47	n.a.	6.5	1.4	18	34.2	3.9	14.2	2.52	0.7	2.05	0.3	1.41	0.26	0.73	0.11	0.68	0.09
25	Hanjiga range	KKS-01	Monzogranite	70.88	0.36	15.52	0.69	n.a.	1.65	0.02	0.94	1.84	3.8	3.81	0.11	1.2	100.13	9.22	38.96	48.96	2.34	4.88	13.89	61.6	331.8	6.73	319.5	6.1	5.56	0.32	136.4	2.57	8.21	7.69	2.52	20.22	32.19	3.33	16.5	2.21	0.51	0.99	0.19	1.12	0.18	0.5	0.06	0.41	0.06
26	Hanjiga range	KKS-15	Monzogranite	71.13	0.37	15.44	1.3	n.a.	2.06	0.02	0.92	1.9	4.21	3	0.11	0.88	100.04	9.04	35.71	46.13	3.85	7.42	13.47	43.56	324.3	3.78	291.7	6.12	5.28	0.31	138.2	2.51	6.99	6.13	0.94	17.62	28.08	2.8	11.11	1.8	0.46	0.91	0.18	1.05	0.19	0.44	0.06	0.35	0.05
27	Hanjiga range	KKS-16	Monzogranite	71.04	0.37	15.45	1.12	n.a.	2.19	0.02	0.93	1.9	4.07	3.27	0.11	0.78	100.13	8.28	32.03	33.39	4.04	5.43	13.48	54.61	291	5.67	398.7	5.78	5.48	0.31	123.1	2.45	5.76	6.66	0.86	16.77	26.92	2.58	10.17	1.9	0.51	0.99	0.18	1.07	0.18	0.45	0.06	0.35	0.05
28	Hanjiga range	KKS-18	Monzogranite	70.49	0.38	15.68	1.27	n.a.	1.84	0.02	1.08	1.87	4.12	3.42	0.11	1.04	100.05	7.15	30.51	27.63	3.21	6.53	12.64	48.94	267.2	5.13	359.4	5.47	5.25	0.32	130.1	2.64	5.76	8.12	1.14	21.98	35.16	3.37	12.33	1.98	0.52	0.98	0.19	1.02	0.18	0.45	0.06	0.4	0.06
29	Hanjiga range	KKS-28	Monzogranite	71.45	0.35	15.01	1.21	n.a.	2	0.03	0.84	2.19	3.87	2.88	0.11	1.54	100.27	7.27	30.29	15.21	4.6	6.42	17.29	67.03	349.5	5.61	377.2	6.3	5.13	0.46	120	3.09	9.99	5.95	1.27	15.44	28.91	3.23	11.86	2.31	0.65	1.81	0.24	1.22	0.22	0.54	0.07	0.49	0.07
30	Hanjiga range	KKS-29	Monzogranite	69.44	0.35	15.22	0.64	n.a.	2.11	0.03	0.63	2.04	3.47	3.67	0.12	2.88	99.96	7.38	29.94	13.87	6.57	9.1	16.22	113.39	233	6.25	341.6	7.37	4.88	0.47	119.2	3.15	11.91	7.15	4.02	16.07	29.84	3.35	12.03	2.25	0.59	1.71	0.24	1.47	0.25	0.68	0.09	0.62	0.09
31	Hanjiga range	KKS-33	Monzogranite	70.35	0.39	15.51	0.49	n.a.	2.33	0.03	0.41	1.45	3.85	3.35	0.12	2.44	100.23	8.08	33.51	13.68	5.3	7.87	17.04	75.27	217.8	6.83	362.9	6.84	4.85	0.43	127.8	3.4	21.45	5.92	2.53	14.31	27.7	3.13	11.51	2.22	0.64	1.62	0.24	1.36	0.26	0.66	0.1	0.62	0.1
32	Hanjiga range	KKS-34	Monzogranite	70.04	0.38	15.01	0.7	n.a.	2.17	0.03	0.66	2.08	3.34	3.28	0.12	3.06	100.17	7.25	32.02	11.94	5.83	7.4	16.08	77.64	222.9	5.38	341	6.78	4.75	0.43	117.7	3.22	13	5.55	2.09	14.34	27.32	3.03	11.06	2.2	0.64	1.49	0.24	1.3	0.25	0.65	0.09	0.63	0.08
33	Boluokenu range	16A‐85	Granite	69.43	0.58	14.76	n.a.	n.a.	4.24	0.1	1.66	2.59	3.04	3.48	0.12	1.45	100	10.7	65.4	27.1	31	22.6	17.6	115	185	4.31	499	27.6	9.41	0.87	206	5.55	20.3	12.2	2.42	28.5	62	6.98	27.8	5.89	1.17	5.53	0.84	4.94	0.97	2.79	0.41	2.63	0.39
34	Boluokenu range	16‐85P	Granite	69.62	0.6	14.56	n.a.	n.a.	4.24	0.11	1.64	2.63	3.01	3.45	0.13	1.51	99.99	10.9	64.9	26.8	30.7	19	17.4	118	184	4.35	496	27.5	9.81	0.84	195	5.28	21	13.3	2.35	28.9	63.1	7.44	28.8	6.02	1.19	5.68	0.86	4.97	0.97	2.79	0.41	2.64	0.39
35	Boluokenu range	16A‐86	Granite	70.83	0.53	14.88	n.a.	n.a.	3.87	0.08	0.38	2.55	3.33	3.42	0.12	1.38	99.99	9.79	45.3	18.8	28.1	14.7	17.1	117	228	4.79	519	29.4	8.61	0.83	178	5.02	32.8	12.5	1.43	28.9	61.5	7.04	28.1	6.01	1.15	5.7	0.88	5.21	1.03	2.93	0.43	2.77	0.41
36	Boluokenu range	16A‐87a	Granite	70.17	0.52	14.77	n.a.	n.a.	3.55	0.06	1.26	2.6	3.05	3.91	0.12	1.24	100.01	10.1	52.1	23.3	171	14.4	16.8	121	181	7.28	513	29	8.6	0.93	189	5.28	45.1	14.2	2.52	30	65.9	7.73	29.7	6.14	1.19	5.85	0.89	5.27	1.03	2.99	0.44	2.81	0.42
37	Boluokenu range	16A‐87b	Granite	70.04	0.54	14.8	n.a.	n.a.	3.75	0.07	1.43	2.46	2.95	3.83	0.12	1.64	99.99	9.6	53.9	24.4	168	16.1	17.1	114	179	6.38	518	28.7	9.04	0.98	184	5.27	24.1	14.7	2.67	30.5	66.8	7.86	30.4	6.29	1.15	5.98	0.9	5.27	1.03	2.93	0.43	2.74	0.41
38	Boluokenu range	16A‐88	Granite	73.43	0.19	14.19	n.a.	n.a.	1.58	0.05	0.17	0.5	4.51	5.33	0.03	0.52	99.98	4.52	4.01	8.76	26.9	6.03	18.9	190	31.3	7.62	426	28	19.8	1.65	230	6.94	29.4	22.2	1.55	49.5	106	12.1	42.3	7.7	1.2	6.37	0.93	5.35	1.02	2.92	0.44	2.93	0.43
39	Boluokenu range	16A‐88P	Granite	73.72	0.19	14.02	n.a.	n.a.	1.61	0.06	0.18	0.5	4.41	5.27	0.03	0.52	99.99	4.64	4.04	2.08	26.4	1.72	18.6	193	30.4	7.63	423	28.1	19.7	1.64	235	7.08	29.7	23.2	1.53	49.4	106	12.1	44	7.67	1.2	6.56	0.96	5.4	1.02	2.96	0.44	2.94	0.44
40	Boluokenu range	16A‐89	Granite	73.52	0.17	14.18	n.a.	n.a.	1.57	0.05	0.13	0.53	4.52	5.3	0.02	0.34	99.99	4.66	2.46	1.28	30.5	1.63	19	191	28.9	8	413	33.5	21.2	1.69	262	7.68	31	22.5	3.61	50.6	108	12.4	43.2	7.95	1.16	6.74	1.03	6.09	1.2	3.49	0.53	3.45	0.51
41	Boluokenu range	16A‐89P	Granite	73.9	0.19	13.97	n.a.	n.a.	1.58	0.05	0.13	0.51	4.45	5.19	0.02	0.42	99.99	4.81	2.55	1.04	30.3	1.45	18.8	194	28.5	7.96	408	33.7	20.8	1.66	252	7.47	30.3	23.4	3.5	50.9	109	12.4	44.6	7.89	1.16	7	1.04	6.11	1.19	3.52	0.53	3.47	0.52
42	Boluokenu range	16A‐90	Granite	73.94	0.19	13.91	n.a.	n.a.	1.58	0.06	0.15	0.5	4.38	5.25	0.03	0.61	99.99	5.13	2.8	3.84	134	1.43	18.8	186	36.3	5.58	432	32.2	21.2	1.74	260	7.66	41.7	23.6	3.16	51.3	112	12.5	45.1	7.87	1.18	6.82	1.02	5.96	1.16	3.45	0.52	3.42	0.51
43	Boluokenu range	YNA14-1	Granite	78.59	0.09	11.75	0.0796323	0.45125	0.59	0.03	0.06	0.22	3.14	4.67	0.02	0.7	99.16	2	<8	n.a.	0.3	<20	14.5	195.2	18.9	2.2	77	21.9	27.3	3.7	93.5	4.1	3.7	23.4	5	18.1	36.5	3.82	12.7	2.96	0.21	2.74	0.52	3.25	0.67	2.25	0.37	2.49	0.39
44	Boluokenu range	YNA14-2	Granite	78.84	0.11	11.9	0.040491	0.229449	0.3	0.01	0.05	0.19	3.2	4.71	0.02	0.6	99.33	2	<8	n.a.	<0.2	<20	14	185.3	19.5	2.1	72	20.2	35	3.6	94	4.2	7.3	20.6	4.8	20.2	42.8	4.01	12.6	2.69	0.27	2.43	0.48	3.21	0.63	2.23	0.4	2.55	0.42
45	Boluokenu range	YNA14-3	Granite	79.16	0.09	11.87	0.0499389	0.282987	0.37	0.01	0.07	0.17	3.07	4.65	0.02	0.4	99.48	1	<8	n.a.	0.2	<20	15	183.1	19.7	2.9	75	24.4	31.5	2.9	85.2	3.9	6.9	24.8	3.8	43.1	84.6	8.33	25.8	4.35	0.33	3.84	0.58	3.51	0.71	2.16	0.37	2.44	0.39
46	Boluokenu range	YNA14-4	Granite	78.7	0.1	12.14	0.0418407	0.237097	0.31	0.01	0.03	0.23	3.49	4.35	0.02	0.6	99.38	1	<8	n.a.	<0.2	<20	14.6	191.8	17.2	1.8	51	15.5	40.3	3.4	84.8	3.9	9.6	24.7	5.2	7.3	12.8	1.51	5.1	1.37	0.2	1.66	0.4	2.73	0.6	1.83	0.32	2.31	0.34
47	Boluokenu range	YNA14-5	Granite	77.66	0.09	12.21	0.0971784	0.550678	0.72	0.02	0.06	0.27	3.6	4.81	0.02	0.4	99.46	2	<8	n.a.	0.4	<20	14.4	200.5	21.6	2.2	86	18.5	27.9	2.8	80.2	3.4	10	22.7	3.7	37.7	74	6.93	20.7	3.56	0.31	3.28	0.51	2.92	0.57	1.83	0.3	2.16	0.32
48	Boluokenu range	YNA14-6	Granite	77.81	0.11	12.17	0.106626	0.604216	0.79	0.03	0.07	0.31	3.67	4.45	0.02	0.5	99.43	2	<8	n.a.	<0.2	<20	16.7	207.3	19.5	2.7	62	20	40.9	3.8	83.9	3.3	7.8	19.6	4.3	9.5	18.3	1.99	7	2.07	0.27	2.29	0.48	3.26	0.71	2.18	0.37	2.51	0.42
49	Boluokenu range	YNA14-7	Granite	77.43	0.11	12.27	0.0836814	0.474195	0.62	0.02	0.04	0.38	3.68	4.72	0.03	0.6	99.3	2	<8	n.a.	0.2	<20	16.2	208	19	2.5	71	23.4	38.4	3.7	95	3.9	8.5	21	4.5	25.8	53.3	5.36	18.1	3.58	0.29	3.38	0.58	3.61	0.77	2.29	0.42	2.8	0.42
50	Boluokenu range	YNA14-8	Granite	78.52	0.1	12.11	0.0782826	0.443601	0.58	0.02	0.04	0.24	3.27	4.59	0.01	0.5	99.48	1	<8	n.a.	<0.2	<20	13.9	201.5	17.2	2.1	66	22.1	37.4	3.5	92.1	3.9	5.5	26.8	4.7	16.4	32.5	3.56	12.9	3.03	0.23	3.01	0.55	3.33	0.66	2.22	0.36	2.75	0.39
51	Boluokenu range	YNA14-9	Granite	78.73	0.1	11.95	0.0661353	0.374767	0.49	0.02	0.04	0.2	3.22	4.56	0.02	0.6	99.33	<1	<8	n.a.	<0.2	<20	14.4	190.2	22	2.2	74	23.8	38.2	4.4	93.1	4.2	6	26.1	4.6	18.4	37.3	4.1	13.7	3.14	0.23	3.05	0.62	3.62	0.78	2.61	0.42	2.78	0.45
52	Boluokenu range	YNA14-10	Granite	78.26	0.1	12	0.0661353	0.374767	0.49	0.03	0.05	0.36	3.21	4.53	0.02	0.9	99.05	2	<8	n.a.	0.3	<20	14.1	192.9	24	2.2	71	20.2	40.1	3.6	86.5	3.6	5.6	23.7	4.9	17.6	36.1	3.6	12.2	2.73	0.24	2.87	0.54	3.24	0.73	2.18	0.39	2.72	0.4
53	Boluokenu range	13XTS-108	Biotitegranite	69.39	0.42	14.67	n.a.	n.a.	3.09	0.05	0.63	1.73	3.69	5.12	0.12	0.83	99.74	6.81	26.5	4.49	50.7	3.7	20.1	230	143	20.6	487	44.5	12.7	1.29	214	5.85	27.5	17.6	4.29	41.2	86.9	9.81	37	7.69	1.25	7.3	1.2	7.55	1.51	4.43	0.64	4.12	0.61
54	Boluokenu range	13XTS-109	Biotitegranite	71.94	0.4	13.63	n.a.	n.a.	2.87	0.06	0.66	1.67	3.85	3.96	0.11	0.63	99.78	5.87	25.6	5.94	63	4.99	19.7	243	99.3	18.2	201	56.3	15.6	2.33	223	6.46	26.8	30	4.31	36.2	82.8	9.26	34.9	7.76	0.81	7.49	1.31	8.68	1.8	5.6	0.86	5.86	0.88
55	Boluokenu range	13XTS-116	Biotitegranite	69.73	0.46	14.07	n.a.	n.a.	3.4	0.06	0.72	2.01	3.72	4.27	0.13	0.98	99.55	7.61	29.4	5.09	43.6	4.27	20.3	208	130	18.9	326	49.7	14.2	1.44	243	6.46	24.9	19.6	4.06	40.8	88.8	10.2	39	8.37	1.17	7.99	1.34	8.44	1.7	5.04	0.72	4.66	0.7
56	Boluokenu range	13XTS-117	Biotitegranite	69.76	0.41	14.63	n.a.	n.a.	2.99	0.05	0.65	1.83	3.82	4.69	0.12	0.97	99.92	6.43	25.7	5	53	4.34	20.5	224	136	15.3	364	47.5	12.9	1.5	225	6.11	25.2	21	4.25	34.2	73.4	8.59	32.4	7.33	1.18	7.24	1.23	7.82	1.61	4.69	0.7	4.6	0.66
57	Boluokenu range	13XTS-94	Monzogranite	71.33	0.46	13.68	n.a.	n.a.	3.22	0.06	0.76	2.26	3.52	3.76	0.1	0.36	99.51	9.17	40.4	12.8	62.1	9.22	16.9	148	138	14.7	549	38.1	11	1.11	249	6.42	20	13.4	1.93	28	60.6	7.03	27.9	6.17	1.18	5.9	0.98	6.25	1.29	3.79	0.56	3.64	0.54
58	Boluokenu range	13XTS-95	Monzogranite	72.39	0.44	13.41	n.a.	n.a.	3.13	0.06	0.74	2.02	3.22	4.04	0.09	0.81	100.3	9.09	38.6	8.58	65.1	6.84	16.5	152	128	12.8	503	35.1	10.1	1.01	225	5.76	23.7	12.9	2.26	27.7	60.4	7.03	26.7	6.19	1.12	5.81	0.95	5.83	1.2	3.44	0.51	3.37	0.48
59	Boluokenu range	13XTS-101	Monzogranite	71.26	0.44	13.69	n.a.	n.a.	3.16	0.07	0.75	2.22	3.47	3.59	0.1	0.77	99.52	9.19	40.2	9.08	50.8	7.01	17.1	140	137	11.5	465	37.7	10.4	1	228	5.92	23.1	14.2	2.6	32.4	68.8	7.88	30.7	6.25	1.18	6.27	1.01	6.32	1.29	3.81	0.54	3.62	0.54
60	Boluokenu range	13XTS-102	Monzogranite	71.31	0.43	13.71	n.a.	n.a.	3.14	0.07	0.72	2.12	3.31	3.77	0.09	0.83	99.5	8.23	38.8	8.05	35.5	5.85	16.9	147	136	12	536	33.3	9.79	0.89	243	6.14	20.2	12.6	1.91	27.9	59.1	6.89	26.4	5.75	1.13	5.58	0.9	5.52	1.15	3.33	0.49	3.24	0.47
61	Boluokenu range	ST-1	Monzogranite	77.24	0.15	12.23	n.a.	n.a.	1.59	0.02	0.19	0.6	3.25	4.58	0.02	0.24	100.1	3.22	9.9	23.62	2.24	11.6	15.1	200	73	n.a.	405	53.5	12.22	2.3	140	4.37	25.9	18.68	1.99	41.48	74.6	9.06	32.44	6.9	0.83	6.9	1.29	8.3	1.72	5.26	0.86	5.7	0.75
62	Boluokenu range	ST-2	Monzogranite	75.58	0.24	12.19	n.a.	n.a.	1.8	0.02	0.31	0.91	2.92	4.72	0.04	0.3	99.05	2.29	4.3	1.86	1.06	1	15.4	234	33	n.a.	136	31.34	9.81	1.32	149	4.94	28.2	29.03	4.2	32.91	68.79	7.51	26.27	5.03	0.45	4.46	0.78	4.86	1	3.05	0.49	3.59	0.52
63	Boluokenu range	ST-3	Monzogranite	76.32	0.09	13.13	n.a.	n.a.	1.2	0.01	0.14	0.64	3.56	4.94	0.01	0.26	100.3	1.9	2.9	1.03	0.72	0.6	16.5	271	30	n.a.	178	33.21	9.88	1.64	108	4.14	32.4	23.14	5.25	25.4	54.35	6.1	21.82	4.63	0.45	4.42	0.8	5.15	1.04	3.21	0.52	3.67	0.54
64	Boluokenu range	ST-4	Monzogranite	76.82	0.11	12.69	n.a.	n.a.	1.32	0.02	0.17	0.54	3.32	4.98	0.02	0.25	100.25	2.1	3.6	1.08	0.9	0.9	15.8	269	30	n.a.	160	32.34	9.28	1.5	126	4.52	30.7	23.59	3.84	18.23	50.56	4.81	17.74	4.1	0.43	4.01	0.74	4.87	1.01	3.13	0.52	3.6	0.53
65	Boluokenu range	ST-5	Monzogranite	77.11	0.06	12.62	n.a.	n.a.	1.05	<0.01	0.14	0.3	3.34	5.06	0.01	0.34	100	1.61	2.2	1.02	0.52	0.6	15.6	280	26	n.a.	87	30.39	8.62	1.39	68	2.99	32.6	25.24	4.63	11.56	30.33	3.4	13.25	3.8	0.28	3.9	0.76	5.05	1.1	3.28	0.54	3.84	0.55
66	Boluokenu range	ST-6	Monzogranite	77.4	0.12	12.06	n.a.	n.a.	1.23	0.02	0.16	0.57	3.25	4.51	0.02	0.29	99.61	2	3	1.34	0.81	0.8	15.7	248	23	n.a.	117	36.55	10.22	1.6	97	3.67	29	33.22	6.58	29.06	61.67	7.02	25.09	5.54	0.38	4.99	0.9	5.56	1.18	3.42	0.55	3.75	0.55
67	Boluokenu range	ST-7	Monzogranite	76.56	0.11	12.72	n.a.	n.a.	1.34	0.02	0.16	0.63	3.51	4.58	0.02	0.33	99.97	2.03	3.4	1.25	0.81	0.9	16.2	258	32	n.a.	122	37.27	10.71	1.76	121	4.52	30.8	20.93	4.34	23.52	54.99	5.68	20.74	4.64	0.4	4.49	0.84	5.56	1.17	3.55	0.59	4.13	0.6
68	Boluokenu range	W-2	Monzogranite	71.15	0.44	14.09	n.a.	n.a.	3.05	0.05	0.82	2.32	3.47	3.56	0.08	0.59	99.67	8.39	36.3	7.31	5.19	5.4	17.9	146	146	n.a.	445	40.99	11.15	0.92	212	6.27	21.7	14.6	2.08	30.69	64.71	7.56	28.53	6.25	1.18	6.08	1.07	6.64	1.35	4.1	0.65	4.08	0.6
69	Boluokenu range	W-3	Monzogranite	71.4	0.55	13.73	n.a.	n.a.	3.17	0.05	0.93	2.28	3.28	3.63	0.09	0.4	99.57	8.95	40.9	7.64	6.07	6.3	17.6	169	144	n.a.	537	39.83	11.13	0.94	235	6.64	21.5	13.27	2.58	27.48	66.25	7.1	27.3	6.19	1.18	6.06	1.05	6.62	1.34	3.9	0.6	3.94	0.56
70	Boluokenu range	W-4	Monzogranite	70.74	0.54	13.91	n.a.	n.a.	3.27	0.05	0.93	2.15	3.21	3.74	0.09	0.93	99.63	8.85	40.3	7.63	5.78	5.7	17.2	137	155	n.a.	634	35.47	9.84	0.76	198	5.53	21.1	12.59	2.43	29.36	63.82	7.32	28.65	6.3	1.27	6.08	1.03	6.05	1.21	3.47	0.52	3.38	0.48
71	Boluokenu range	W-5	Monzogranite	69.6	0.51	15.06	n.a.	n.a.	3.14	0.05	1.06	2.94	3.83	2.93	0.1	0.83	100.1	8.22	32.9	9.87	6.28	6.4	18.3	113	225	n.a.	314	39.41	9.82	1.32	189	527	15.5	11.79	3.69	18.42	40.55	4.92	19.84	5.27	1.02	5.63	1.01	6.35	1.29	3.85	0.64	4.13	0.58
72	Boluokenu range	W-7	Monzogranite	69.32	0.56	14.98	n.a.	n.a.	3.22	0.05	1.06	2.26	3.28	4.57	0.11	0.42	99.9	7.06	35.6	9.71	6.87	6.7	18	162	201	n.a.	573	47.75	10.72	1.22	155	4.29	19	14.65	2.93	33.64	77.17	8.38	31.94	7.5	1.04	7.44	1.3	8.19	1.62	4.82	0.74	4.59	0.6
73	Boluokenu range	W-10	Monzogranite	70.93	0.42	14.67	n.a.	n.a.	2.8	0.06	0.99	2.36	3.56	3.25	0.09	0.49	99.65	6.56	32	9.23	5.82	5.9	17.9	200	220	n.a.	324	30.22	9.54	1.33	170	4.93	16.6	12	2.73	17.89	39.85	4.63	17.86	4.36	0.76	4.2	0.77	4.77	0.95	2.89	0.47	3.22	0.47
74	Boluokenu range	W-11	Monzogranite	74.7	0.22	12.56	n.a.	n.a.	2.1	0.06	0.61	1.99	5.64	5.9	0.08	1.36	99.89	5.21	17.4	7.1	2.79	4.6	18.8	86	120	n.a.	17	103.26	10.39	1.79	130	5.01	8.6	26.24	7.49	15.67	37.69	4.75	20	6.94	0.45	9.21	1.99	14.08	3.04	10.01	1.68	11.66	1.7
75	Boluokenu range	W-12	Monzogranite	73.02	0.27	13.72	n.a.	n.a.	1.92	0.04	0.49	1.47	3.72	3.97	0.05	0.39	99.07	4.35	16.4	3.84	2.84	2.6	18.2	266	154	n.a.	182	48.82	10.54	2.29	143	4.9	27.8	24.3	5.77	15.46	35.68	4.3	17.57	5.25	0.42	6.07	1.18	7.89	1.61	5	0.83	5.71	0.81
76	Boluokenu range	W-13	Monzogranite	75.3	0.23	13.31	n.a.	n.a.	1.38	0.04	0.41	1.25	3.9	3.82	0.04	0.42	100.1	3.03	11.2	3.63	2.09	2.6	17.3	259	116	n.a.	82	59.98	11.14	2.97	122	5	26.9	26.23	5.3	12.62	40.48	3.95	16.02	5.09	0.28	6.07	1.3	8.78	1.82	5.89	1	6.67	0.93
77	Boluokenu range	W-14	Monzogranite	70.15	0.48	14.5	n.a.	n.a.	3.39	0.11	0.83	1.76	4.24	3.35	0.1	0.54	99.45	8.66	26.8	6.03	4.91	4.3	23.4	295	127	n.a.	108	80.93	26.39	6.08	234	8.54	26.4	57.95	9.75	32.96	76.54	9.19	36.1	9.77	0.36	10.1	1.95	12.55	2.55	8.07	1.37	9.42	1.33
78	Boluokenu range	W-15	Monzogranite	75.09	0.22	12.87	n.a.	n.a.	1.92	0.05	0.46	1.38	3.61	3.5	0.05	0.41	99.56	4.37	13.9	3.88	2.56	2.6	17.8	241	122	n.a.	123	55.79	12.41	2.84	163	6.11	27.1	23.33	4.79	18.63	43.7	5.17	20.89	6.05	0.33	6.88	1.34	8.71	1.8	5.56	0.9	6.09	0.86
79	Boluokenu range	W-I6	Monzogranite	75.14	0.16	13.27	n.a.	n.a.	1.44	0.04	0.4	1.18	3.57	4.05	0.03	0.43	99.7	3.41	9.5	3.44	1.93	2.3	16.3	236	73	n.a.	98	45.61	9.89	2.17	95	3.85	26.3	27.48	7.45	11.75	39.28	3.67	14.45	4.53	0.31	4.65	0.95	6.42	1.35	4.33	0.76	5.23	0.74
80	Boluokenu range	16NL-9	Porphyry Granite	73.07	0.24	12.31	n.a.	n.a.	1.8	0.04	0.4	1.25	2.53	3.34	0.04	0.84	95.86	n.a.	18.1	4.61	104	7.76	n.a.	204	94.8	n.a.	557	n.a.	11.4	1.18	89.4	3.83	22.3	18.1	2.02	34.1	71.3	8.72	343	7.37	1.16	6.58	1.39	8.62	1.74	486	0.882	5.45	0.74
81	Boluokenu range	16NL-10	Porphyry Granite	72.62	0.25	12.16	n.a.	n.a.	1.88	0.04	0.42	1.32	2.45	3.68	0.05	0.8	95.67	n.a.	18.4	4.36	126	9.49	n.a.	199	95.4	n.a.	563	n.a.	11.2	1.19	86.3	3.66	22.7	18.8	1.96	32.7	75	8.35	33	7.13	1.2	6.43	1.38	8.5	1.64	4.56	0.841	5.15	0.702
82	Boluokenu range	16NL-11	Porphyry Granite	70.13	0.23	12.3	n.a.	n.a.	1.73	0.04	0.38	1.28	2.63	3.15	0.04	0.66	92.56	n.a.	17.4	4.44	112	8.15	n.a.	177	94.3	n.a.	563	n.a.	10.9	1.17	83.1	3.51	24.1	19.6	1.93	44	88.2	10.8	42.8	8.69	1.22	7.86	1.62	9.37	1.85	5.1	0.888	5.51	0.762
83	Boluokenu range	16NL-12	Porphyry Granite	72.73	0.21	12.17	n.a.	n.a.	1.64	0.04	0.32	1.24	2.57	3.7	0.03	0.89	95.53	n.a.	13.7	3.48	88.7	6.85	n.a.	187	97.7	n.a.	465	n.a.	10.7	1.17	84.3	3.71	27.8	18.9	2.88	36.4	73.5	8.87	35	7.6	1.03	6.82	1.43	8.33	1.69	4.68	0.825	5.29	0.713
84	Boluokenu range	16NL-13	Porphyry Granite	70.4	0.2	11.96	n.a.	n.a.	1.63	0.04	0.35	1.09	2.44	3.7	0.03	0.5	92.35	n.a.	14.7	2.77	101	8.08	n.a.	217	81.3	n.a.	466	n.a.	12.6	1.41	90.8	4.02	29.3	23.8	2.56	59.7	118	14	53	9.79	1.05	8.55	1.68	9.45	1.95	5.51	0.973	6.25	0.843
85	Boluokenu range	16NL-14	Porphyry Granite	72.62	0.22	11.85	n.a.	n.a.	1.67	0.04	0.33	1.19	2.5	4.03	0.04	1.11	95.61	n.a.	12.7	3.29	98	7.84	n.a.	164	80	n.a.	411	n.a.	10.1	1.07	71.3	3.18	20	18.6	2.87	44.1	88.6	10.6	41.2	8.25	0.964	7.03	1.36	1.96	1.57	4.56	0.801	483	0.654
86	Boluokenu range	16NL-15	Porphyry Granite	68.87	0.36	12.63	n.a.	n.a.	2.59	0.05	0.68	1.86	2.43	3.37	0.08	0.69	93.61	n.a.	25.9	6.31	83.9	7.88	n.a.	158	111	n.a.	496	n.a.	11.2	1.01	86.6	3.26	21.8	14.8	1.32	36.2	71.5	9.01	35.2	7.38	1.16	6.44	1.35	7.92	1.52	4.34	0.758	4.83	0.645
87	Boluokenu range	LX1	Monzogranite	71.25	0.47	14	n.a.	n.a.	2.78	0.05	0.61	2.2	3.89	4.01	0.15	0.45	99.86	n.a.	20.65	4.12	184.59	12.97	n.a.	271.47	102.31	n.a.	382.4	n.a.	12.44	1.93	111.17	6.87	35.08	20.08	2.72	32.09	64.19	7.29	26.13	4.99	0.78	4.37	0.88	4.73	1.02	2.88	0.6	3.8	0.54
88	Boluokenu range	LX2	Monzogranite	71.58	0.34	13.7	n.a.	n.a.	2.09	0.04	0.46	1.87	3.88	435	0.11	0.74	99.16	n.a.	41.95	4.31	175.33	12.96	n.a.	202.89	139.88	n.a.	293.96	n.a.	13.79	191	167.34	8.13	27.65	2037	3.49	28.31	56.16	6.86	25.38	5.27	0.84	4.6	0.95	5.21	1.11	3.08	0.62	3.98	0.55
89	Boluokenu range	LX3	Monzogranite	71.79	0.41	13.32	n.a.	n.a.	2.6	0.05	0.51	1.81	3.64	4.23	0.13	0.51	99	n.a.	28.74	3.77	166.75	12.29	n.a.	216.46	113.65	n.a.	281.51	n.a.	12.76	1.97	138.61	7.3	29.43	24.42	5.17	23.23	48.08	5.88	21.95	4.67	0.75	4.13	0.87	4.78	1.04	2.91	0.6	3.82	0.53
90	Boluokenu range	16NL-25	Monzogranite	72.16	0.15	12.64	n.a.	n.a.	1.03	0.03	0.23	0.81	4.51	4.13	0.03	0.4	96.12	n.a.	8.78	2.47	126	7.51	n.a.	250	40.8	n.a.	200	n.a.	9.55	1.51	83.2	3.59	31.5	17.5	3.02	22.1	45.4	5.43	20	4.2	0.53	3.61	0.723	4.16	0.843	2.56	0.491	3.27	0.456
91	Boluokenu range	16NL-26	Monzogranite	70.14	0.39	13.79	n.a.	n.a.	2.29	0.05	0.72	2.04	3.88	3.59	0.09	0.39	97.37	n.a.	32	4.21	85.4	7.53	n.a.	187	125	n.a.	356	n.a.	9.4	123	80.4	3.01	23.5	12.8	2.17	21.5	44.9	4.93	19	4.14	0.892	3.8	0.784	4.62	0.949	2.78	0.496	3.28	0.467
92	Boluokenu range	16NL-27	Monzogranite	66.64	0.41	13.98	n.a.	n.a.	2.49	0.05	0.66	2.22	5.03	2.8	0.08	0.43	94.78	n.a.	34.6	4.08	79.4	6.9	n.a.	197	128	n.a.	314	n.a.	10.7	1.74	90.8	3.51	24	16.1	2.5	25.7	50.7	6.01	22.9	4.73	0.84	4.4	0.879	5.32	1.07	3.16	0.58	3.96	0.552
93	Boluokenu range	C14JH02	Monzogranite	70.3	0.53	13.9	n.a.	n.a.	3.4	0.07	1.28	2.87	3.45	3.12	0.12	0.66	99.7	12.83	70.2	34.5	10.3	15.03	18.7	139	151	11.3	289	35.5	11.07	0.9	248	5.81	24.5	19.6	2.8	33.7	68.6	8.04	31.5	5.5	0.95	5.34	0.934	5.27	1.09	3.18	0.493	3.13	0.484
94	Boluokenu range	C14JH03	Monzogranite	70.5	0.53	13.8	n.a.	n.a.	3.37	0.07	1.29	2.76	3.36	3.39	0.12	0.44	99.6	11.69	66.9	30.8	10.1	14.13	18.4	169	146	16.2	318	33.9	10.89	0.92	198	4.67	24	15.3	1.99	24.2	49.1	5.75	23.9	4.84	0.92	4.89	0.833	4.97	1.04	3.08	0.447	3.11	0.449
95	Boluokenu range	C14JH04	Monzogranite	70.6	0.55	13.25	n.a.	n.a.	3.49	0.07	1.32	2.6	3.14	3.38	0.13	0.62	99.2	11.9	69.5	38.1	10.5	16.83	18.3	156	137	14.2	310	34	10.71	0.87	237	5.74	24.6	15	1.99	25.2	51.8	6.13	24.4	4.93	0.94	4.96	0.864	5.04	1.06	3.11	0.457	3.06	0.457
96	Boluokenu range	C14JH13	K-feldspar granite	72.7	0.37	13.3	n.a.	n.a.	2.54	0.06	0.64	2.04	3.48	3.58	0.07	0.34	99.1	9.3	41.1	12.1	5.54	5.86	18.6	142	124	12	476	30.6	9.45	0.71	202	5.15	24.5	18.8	2.39	25.6	53.2	6.09	24.3	4.92	0.96	4.75	0.809	4.89	1.02	2.94	0.445	2.92	0.438
97	Boluokenu range	C14JH14	K-feldspar granite	72	0.47	12.9	n.a.	n.a.	3.2	0.07	0.84	2.01	3.24	3.63	0.09	1.21	99.7	11.84	52.8	14.5	6.97	6.7	18.2	134	128	8.13	409	35.9	10.44	0.64	224	5.47	26.7	14.3	2.46	32.6	64.3	7.66	29.4	5.59	0.94	5.65	0.945	5.66	1.15	3.43	0.488	3.11	0.482
98	Boluokenu range	C14JH15	K-feldspar granite	72.2	0.44	13.35	n.a.	n.a.	2.97	0.06	0.77	2.15	3.35	3.68	0.08	0.76	99.8	11.27	49.4	13.2	6.63	6.98	18	137	126	12.4	454	34.5	10.08	0.66	209	5.18	25.7	12.2	1.29	26	52.2	6.27	24.7	5.44	0.95	5.25	0.897	5.42	1.12	3.18	0.473	3.01	0.43
99	Boluokenu range	C14JH16	K-feldspar granite	72.9	0.42	13.05	n.a.	n.a.	2.93	0.07	0.78	2.09	3.31	3.61	0.08	0.45	99.7	11.31	48.1	16.9	6.57	6.5	17.8	144	123	11.9	427	36.1	9.9	0.62	198	5.03	32.2	14.2	2.15	29.1	58.1	6.81	27.9	5.66	0.93	5.49	0.935	5.64	1.15	3.43	0.508	3.21	0.458
100	Boluokenu range	14Kd-51	Granodiorite	69.8	0.18	16.71	n.a.	n.a.	1.47	0.03	0.79	2.95	4.95	2.05	0.07	0.36	99.36	2.7	16.76	4.94	177.9	15.81	17.88	60.86	391.68	5.87	224.1	5.63	2.18	0.46	49.35	3.92	n.a.	3.7	3.43	9.66	20.33	2.27	9.21	1.81	0.53	1.77	0.22	1.24	0.22	0.62	0.09	0.57	0.08
101	Boluokenu range	14Kd-52	Granodiorite	69.69	0.19	16.75	n.a.	n.a.	1.6	0.03	0.83	3.07	5.2	1.73	0.07	0.49	9965	5.02	16.35	4.41	189.5	16.54	17.72	76.36	393.78	14.39	230.8	5.73	2.38	0.5	40.91	4.04	n.a.	3.68	1	9.92	20.85	2.35	9.49	1.91	0.56	1.85	0.24	1.32	0.23	0.66	0.09	0.59	0.09
102	Boluokenu range	14Kd-53	Granodiorite	70.16	0.19	16.72	n.a.	n.a.	1.53	0.03	0.8	3.09	5.14	1.78	0.07	0.38	99.89	416	16.76	4.54	186.8	16.52	18.06	62.29	401.48	5.76	228.9	5.64	2.28	0.5	40.93	3.97	n.a.	3.98	1.3	10.39	21.93	2.47	9.93	1.94	0.57	1.89	0.22	1.25	0.21	0.61	0.08	0.54	0.07
103	Boluokenu range	14Kd-54	Granodiorite	67.68	0.29	16.86	n.a.	n.a.	2.67	0.06	1.14	3.59	5.32	1.33	0.09	0.73	99.76	6.02	16.63	4.96	181.8	15.68	18.07	64.87	391.18	6.11	249.7	5.63	2.37	0.5	37.21	3.83	n.a.	4.3	0.76	1076	22.46	2.5	9.93	1.95	0.57	1.87	0.22	1.24	0.21	0.6	0.08	0.53	0.07
104	Yilianhabierga range	SLT-2-1	Diorite porphyry	64.2	0.3	16.65	n.a.	n.a.	2.38	0.28	0.78	11.45	0.73	0.02	0.07	2.8	99.89	7.94	22.7	27.1	4.62	9.19	14.1	0.64	992	0.35	41.2	21.7	8.4	0.77	171	3.81	3.39	13.8	3.05	11.3	29.8	3.63	12.8	2.64	0.24	2.65	0.39	2.61	0.61	1.66	0.29	1.82	0.28
105	Yilianhabierga range	SLT-2-2	Diorite porphyry	62.2	0.41	17	n.a.	n.a.	2.82	0.18	1.1	11.25	1.02	0.1	0.1	2.86	99.42	8	29.2	25.3	5.2	10.39	16.9	4.8	755	2.16	11.8	19.8	7.09	0.94	137	4.39	7.19	11.8	3.01	10	25	3.38	14	3.31	0.28	2.91	0.52	3.75	0.8	2.37	0.36	2.15	0.32
106	Yilianhabierga range	SLT-2-3	Diorite porphyry	64	0.3	16.6	n.a.	n.a.	2.45	0.28	0.76	11.35	0.72	0.02	0.07	2.74	99.49	6.94	22.3	34	4.87	14.94	14.7	0.64	991	0.63	60.4	21	8.24	1.06	166	5.13	4.01	14.9	3.5	14.4	36.9	4.87	18.5	3.83	0.33	2.93	0.53	3.65	0.78	2.33	0.33	2.36	0.37
107	Yilianhabierga range	SLT-53-1	Biotite granite	72.9	0.22	13.6	n.a.	n.a.	2.16	0.03	0.57	2.01	3.35	3.82	0.05	0.41	99.24	6.25	20.9	52.7	4.33	7.15	14.6	131	224	4.54	493	20.7	6.35	0.71	116	3.28	17.6	13.4	1.54	24.2	48.1	4.94	17.4	3.29	0.79	3.14	0.55	3.24	0.73	2.07	0.36	2.22	0.37
108	Yilianhabierga range	SLT-53-2	Biotite granite	73	0.23	13.7	n.a.	n.a.	2.04	0.03	0.61	2.1	3.38	3.84	0.06	0.3	99.45	6.53	22	55.6	4.54	6.6	14.7	125	368	3.51	488	19.3	6.74	0.72	114	3.39	14.7	12.6	1.68	20.9	40.3	4.17	14.7	2.77	0.7	3.04	0.49	3.07	0.66	1.91	0.33	2.15	0.35
109	Yilianhabierga range	SLT-53-3	Biotite granite	71.3	0.23	13.25	n.a.	n.a.	2.42	0.03	0.62	2.02	3.73	3.51	0.05	1.79	99.08	6.49	21.6	58.7	4.13	7.29	14.4	124	299	2.64	496	21.6	6.24	0.66	129	3.53	15.7	14.2	1.72	23.1	45.6	4.76	16.8	3.18	0.84	3.25	0.55	3.21	0.74	2.21	0.37	2.41	0.38
110	Yilianhabierga range	SLT-53-4	Biotite granite	72.4	0.25	13.5	n.a.	n.a.	2.39	0.03	0.67	1.44	3.86	3.39	0.05	1.33	99.43	6.65	23.3	56.5	4.13	10.7	15.1	122	280	2.88	483	21.6	6.54	0.65	141	3.91	17.2	14.7	2	24.2	47.9	5.02	17.4	3.2	0.8	3.23	0.57	3.41	0.76	2.29	0.37	2.4	0.4
111	Yilianhabierga range	SLT-53-5	Biotite granite	69.3	0.36	14.6	n.a.	n.a.	3.11	0.04	1	2.85	4.15	1.87	0.08	1.49	99	8.36	35.6	42.1	7.06	8.09	15.2	59.7	598	2.02	400	19.2	5.84	0.54	112	2.96	6.76	8.8	1.44	21.3	42.9	4.59	16.8	3.25	0.88	3.07	0.56	3.15	0.69	1.91	0.31	2.02	0.31
112	Yilianhabierga range	SLT-54-1	Granite	73	0.25	13.55	n.a.	n.a.	0.88	0.04	0.53	4.26	3.04	2.62	0.05	1.65	100.15	7.77	22.9	26.4	1.6	8.28	12.7	63.6	1280	2.87	687	19.1	6.73	0.83	147	4.42	6.24	14	2.2	19	40	4.48	16.1	3.29	0.47	2.27	0.47	3.06	0.69	2.11	0.31	2.19	0.36
113	Yilianhabierga range	SLT-54-2	Granite	73.5	0.22	13.7	n.a.	n.a.	0.95	0.03	0.5	3.43	2.92	3.82	0.05	0.5	99.9	7.82	18.5	20.1	1.28	4.34	12.5	79.5	1340	2.55	954	18.3	6.44	0.94	129	4.3	6.44	14	2.17	17.5	37.3	4.21	15.2	3.12	0.53	2.41	0.46	2.98	0.69	2.01	0.34	2.23	0.37
114	Yilianhabierga range	SLT-54-3	Granite	73.7	0.23	13.3	n.a.	n.a.	0.77	0.05	0.49	4.62	2.8	1.84	0.05	1.63	99.67	7.01	18.8	37.9	1.29	5.96	12	44.8	1120	2.53	425	18.4	6.56	0.84	135	4.15	4.47	14	2.38	17.1	37.7	4.17	15.3	3.05	0.4	2.48	0.44	2.9	0.66	2	0.33	2.17	0.36
115	Yilianhabierga range	SLT-54-4	Granite	72.3	0.23	13.5	n.a.	n.a.	0.79	0.05	0.46	5.05	2.98	1.7	0.05	2.41	99.72	7.23	21	23.1	1.34	4.81	13	50	1190	3.71	448	18.8	6.43	0.88	143	4.43	5.24	13.7	2.39	17.4	36.8	4.09	14.4	2.9	0.52	2.44	0.45	2.97	0.66	2.01	0.33	2.37	0.36
116	Yilianhabierga range	SLT-54-5	Granite	73.9	0.25	14	n.a.	n.a.	0.73	0.02	0.54	5.03	3.93	0.16	0.07	0.62	99.49	6.92	18.5	56.8	1.38	6.48	13.1	4.4	1550	2.01	67	21.2	7.5	0.71	134	3.93	4.92	13.1	2.34	13.3	33.3	3.95	15.2	3.47	0.71	3.47	0.61	3.61	0.76	2.21	0.34	2.36	0.36
117	Yilianhabierga range	SLT-54-6	Granite	73	0.24	13.4	n.a.	n.a.	0.61	0.01	0.69	5.33	2.31	1.9	0.05	0.87	98.68	5.58	24.3	58.6	1.11	7.18	17.5	51.1	1200	1.25	346	18.2	6.65	0.73	120	3.37	4.42	12.8	2.55	16.4	36.3	3.99	14.5	2.75	0.5	2.72	0.52	2.83	0.63	1.86	0.31	2.01	0.34
118	Yilianhabierga range	SLT-54-7	Granite	73.1	0.25	13.8	n.a.	n.a.	0.62	0.02	0.59	6.56	1.64	0.88	0.06	1.57	99.27	4.63	22.4	52.5	1.1	7.01	12.8	24.8	1090	2.05	206	18.8	6.32	0.67	119	3.31	4.22	12.9	2.21	19.9	43	4.7	16.6	2.96	0.48	3.09	0.52	2.99	0.66	1.88	0.3	2.12	0.34
119	Yilianhabierga range	SLT-3-1	Quartz diorite porphyry	68.2	0.25	15.2	n.a.	n.a.	2.3	0.32	0.66	10	0.64	0.02	0.06	1.83	100.5	5.75	14.5	32.1	3.49	7.78	13.8	0.89	837	0.49	30.7	26.8	6.62	0.95	146	4.21	4.75	9.1	2.27	14	35.1	4.38	16.9	3.46	0.22	2.61	0.55	4.07	0.98	3.17	0.52	3.23	0.5
120	Yilianhabierga range	SLT-3-2	Quartz diorite porphyry	68.1	0.24	15.05	n.a.	n.a.	2.18	0.28	0.6	9.93	0.64	0.02	0.06	1.66	100.1	5.87	15.3	26.3	3.03	8.67	13.8	0.93	829	1.22	18.2	29.7	6.31	0.79	136	3.91	7.16	13	2.95	13.3	33.1	4.19	15.5	3.17	0.2	2.59	0.56	4.19	1.08	3.84	0.65	4.45	0.7
121	Yilianhabierga range	SLT-3-3	Quartz diorite porphyry	66.5	0.26	15.3	n.a.	n.a.	2.82	0.32	0.68	10.35	0.62	0.02	0.07	1.67	101.25	5.82	17.3	57.2	4.83	9.36	13.7	0.79	807	0.55	14.6	26.6	7.53	0.89	137	4.28	51.3	10.1	2.79	12.9	34.1	4.31	17.2	3.77	0.2	2.98	0.61	3.98	0.9	2.83	0.44	3.06	0.47
122	Yilianhabierga range	1	Porphyry Granite	76.14	0.3	11.85	1.9	0.09	n.a.	0.05	0.56	1.46	2.67	4.99	0.09	0.63	100.73	n.a.	n.a.	n.a.	n.a.	n.a.	n.a.	233	79	n.a.	424	n.a.	16	n.a.	234	8.3	n.a.	24	4.3	28.11	66.57	8.13	27.21	6.44	0.78	6.04	1.17	7.39	1.52	4.54	0.75	4.93	0.72
123	Yilianhabierga range	2	Porphyry Granite	74.74	0.11	12.86	1.25	0.06	n.a.	0.03	0.08	0.79	3.8	5.28	0.04	0.6	99.64	n.a.	n.a.	n.a.	n.a.	n.a.	n.a.	399	13	n.a.	67	n.a.	33	n.a.	176	9	n.a.	56	4.6	24.55	38.63	6.91	31.76	9.45	0.22	9.27	2.04	13.65	2.83	8.66	1.15	10.33	1.49
124	Yilianhabierga range	3	Porphyry Granite	71.2	0.61	14.07	1.13	1.06	n.a.	0.033	0.67	0.04	3.94	4.58	n.a.	0.32	97.65	n.a.	n.a.	n.a.	n.a.	n.a.	n.a.	n.a.	n.a.	n.a.	n.a.	n.a.	n.a.	n.a.	n.a.	n.a.	n.a.	n.a.	n.a.	n.a.	n.a.	n.a.	n.a.	n.a.	n.a.	n.a.	n.a.	n.a.	n.a.	n.a.	n.a.	n.a.	n.a.
125	Yilianhabierga range	4	Monzogranite	68.88	0.45	13.95	2.42	0.79	n.a.	0.024	0.86	2.14	4.1	2.47	n.a.	0.33	96.41	n.a.	n.a.	n.a.	n.a.	n.a.	n.a.	n.a.	n.a.	n.a.	n.a.	n.a.	n.a.	n.a.	n.a.	n.a.	n.a.	n.a.	n.a.	n.a.	n.a.	n.a.	n.a.	n.a.	n.a.	n.a.	n.a.	n.a.	n.a.	n.a.	n.a.	n.a.	n.a.
126	Yilianhabierga range	5	Diorite	54.95	0.99	16.8	5.2	1.87	n.a.	0.15	5.2	6.39	3.58	2.39	0.33	2.16	100.01	n.a.	n.a.	n.a.	n.a.	n.a.	n.a.	71	589	n.a.	670	n.a.	14	n.a.	606	12	n.a.	5.1	1.1	25.86	60.86	8.27	34.27	7.65	2.47	6.7	1.11	6.68	1.37	3.76	0.6	3.65	0.55
127	Yilianhabierga range	DK12-45-1	Biotite granite	68.36	0.37	15.28	n.a.	n.a.	3.32	0.05	0.49	2.36	4.88	3.95	0.1	0.7	99.87	7.16	22	n.a.	4.51	4.29	22.8	183	185	n.a.	407	52	13.8	2.33	235	7.06	24	12.2	4.74	18	41	5.44	24	6.6	1.18	7.45	1.46	9.42	1.88	5.67	0.83	5.48	0.82
128	Yilianhabierga range	DK12-45-2	Biotite granite	66.51	0.46	15.98	n.a.	n.a.	4.1	0.06	0.72	2.76	4.72	3.75	0.14	0.66	99.86	10.09	29	n.a.	6.27	5.92	23.4	177	139	n.a.	546	54	13.7	1.29	306	8.39	21.4	11.9	2.94	23	52	7.1	32	8.5	1.43	9.27	1.71	10.65	2.09	5.97	0.83	5.12	0.75
129	Yilianhabierga range	DK12-45-3	Biotite granite	73.67	0.15	13.48	n.a.	n.a.	1.49	0.03	0.19	0.84	3.55	5.47	0.05	0.95	99.88	3.3	11	19.89	2	9.51	16.4	185	82	n.a.	410	30	7.9	1.31	133	4.23	28.1	14.8	2.76	24	50	5.95	23	5.31	0.76	5.37	0.94	5.62	1.04	2.94	0.42	2.73	0.4
130	Yilianhabierga range	DK12-46-1	Quartz-diorite	61.31	1.01	16.94	n.a.	n.a.	5.44	0.08	1.95	4.21	3.79	3.09	0.25	1.75	99.83	12.4	67	9.36	12.19	12.22	21.9	149	419	n.a.	567	40	18.4	1.76	157	3.79	17.7	13.4	3.2	34	71	8.64	36	7.2	1.5	7.1	1.18	7.09	1.39	4.09	0.6	3.91	0.58
131	Yilianhabierga range	DK12-46-2	Quartz-diorite	59.7	1.13	17.54	n.a.	n.a.	5.79	0.09	2.22	5.1	3.69	2.41	0.29	1.85	99.83	13.61	80	n.a.	12.86	13.16	21.6	121	434	n.a.	574	41	22	2.64	297	7.55	15.7	12.1	2.57	38	83	10.08	43	9.05	1.72	8.81	1.42	8.35	1.56	4.33	0.6	3.64	0.53
132	Yilianhabierga range	DK12-46-3	Quartz-diorite	61.33	0.99	16.98	n.a.	n.a.	5.31	0.08	2.02	4.62	3.49	3.09	0.25	1.67	99.85	12.56	74	2.54	12.44	12.6	22.2	147	435	n.a.	540	37	18.9	2.39	265	6.7	19.6	13.9	3.14	36	76	8.99	37	7.48	1.51	7.15	1.17	6.9	1.34	3.9	0.57	3.69	0.55
133	Yilianhabierga range	DK12-43-1	Quartz-diorite	65.4	0.96	13.85	n.a.	n.a.	6.54	0.11	1.97	2.98	3.51	3.26	0.17	1.11	99.85	19.54	97	9.43	15.28	17.62	17.6	116	141	n.a.	523	42	11.6	1.14	255	6.78	16.5	10.8	2.35	27	59	7.3	31	7.1	1.62	7.44	1.27	7.77	1.56	4.63	0.66	4.29	0.67
134	Yilianhabierga range	DK12-43-2	Quartz-diorite	62.7	1.04	14.44	n.a.	n.a.	7.05	0.14	2.49	4.58	3.62	2.34	0.16	1.33	99.88	22.47	128	23.97	18.99	20.41	18.5	83	158	n.a.	391	39	9	0.74	213	5.79	13.4	8.6	1.99	23	49	6.22	26	6.28	1.57	6.68	1.15	7.19	1.44	4.26	0.6	3.9	0.6
135	Yilianhabierga range	DK12-43-3	Quartz-diorite	65.66	0.97	14.09	n.a.	n.a.	6.58	0.12	2.03	2.88	3.52	2.69	0.17	1.16	99.87	19.35	108	15.82	15.2	19.11	16.9	100	148	n.a.	473	41	11.2	1.17	249	6.75	13.1	10.8	2.41	27	59	7.35	31	7.03	1.63	7.37	1.26	7.68	1.55	4.57	0.66	4.34	0.66
136	Yilianhabierga range	DK12-47-1	Quartz-diorite	68.23	0.46	16.06	n.a.	n.a.	3.16	0.05	0.94	3.42	3.64	3.12	0.14	0.64	99.86	5.9	39	5.96	6.01	7.31	19.8	143	296	n.a.	427	16	11	1.26	213	5.47	13.5	12	1.75	28	59	6.26	23	4.34	1.01	3.88	0.56	3.04	0.57	1.62	0.23	1.54	0.24
137	Yilianhabierga range	DK12-47-2	Quartz-diorite	65.67	0.69	16.12	n.a.	n.a.	3.93	0.06	1.24	4	3.49	3.45	0.14	1.05	99.85	9	51	2.25	7.59	6.91	21.1	143	298	n.a.	506	23	12.1	1.08	251	6.42	15.3	15.1	2.3	41	80	9.21	35	6.4	1.21	5.75	0.85	4.68	0.87	2.39	0.33	2.12	0.32
138	Yilianhabierga range	DK12-47-3	Quartz-diorite	65.76	0.68	16.31	n.a.	n.a.	3.81	0.06	1.24	3.81	3.33	3.47	0.15	1.2	99.83	9.98	51	n.a.	7.72	7.22	20.8	146	293	n.a.	499	23	12.8	1.29	266	6.7	16.7	14.3	3.05	38	80	8.92	34	5.79	1.21	5.07	0.72	4.01	0.79	2.33	0.36	2.42	0.38
139	Awulale range	04XJ-262	Syenite	60.46	0.86	16.64	5.16	n.a.	7.78675	0.14	0.59	1.09	3.16	8.58	0.5	0.82	99.77	n.a.	121	5.77	11.8	4.03	15.8	334	224	4.84	943	25.2	10.2	0.75	212	5.75	9.84	19.7	5.48	29.3	67.3	8.73	33.5	6.8	1.4	6	0.86	4.83	0.95	2.69	0.4	2.61	0.42
140	Awulale range	04XJ-264	Syenite	58.93	0.91	16.85	4.98	n.a.	9.02007	0.14	0.51	1.1	3.73	8.11	0.5	0.82	99.78	n.a.	103	7.93	13.3	6.32	16.7	326	177	3.01	889	29.8	10.9	0.77	236	6.29	7.91	17.9	4.23	20	54.5	7.45	30.8	7.09	1.39	6.62	1.01	5.67	1.14	3.18	0.46	2.99	0.47
141	Awulale range	04XJ-265	Syenite	60.11	0.75	17.63	4.05	n.a.	7.25793	0.11	0.84	1.22	3.52	7.96	0.43	1.13	99.77	n.a.	121	7.66	12.7	5.25	17.3	311	324	9.87	798	21.8	9.21	0.71	200	5.26	10.87	19.6	4.47	25.1	64.5	8.83	34	6.57	1.45	5.43	0.78	4.27	0.86	2.42	0.34	2.29	0.37
142	Awulale range	04XJ-266	Syenite	59.12	1.21	15.69	4.23	n.a.	10.6478	0.14	0.26	1.67	3.66	6.72	0.66	0.88	99.78	n.a.	152	17.2	10.1	5.67	15.1	268	255	4.34	808	36.8	8.79	0.69	175	4.88	10.96	17.2	4.89	37.3	86.9	10.8	42.2	8.86	1.97	8.06	1.24	6.81	1.36	3.75	0.55	3.55	0.56
143	Awulale range	04XJ-267	Syenite	57.84	0.91	16.18	4.92	n.a.	10.2613	0.18	0.99	1.11	2.09	9.76	0.54	1.43	99.78	n.a.	110	6.44	15.5	4.87	16.3	320	150	4.05	925	23	9.53	0.68	216	5.61	9.87	17.8	3.83	11.9	29.8	4.19	18.3	4.69	0.97	4.4	0.74	4.21	0.9	2.46	0.39	2.64	0.42
144	Awulale range	04XJ-268	Syenite	59.93	1.05	15.42	4.49	n.a.	9.31227	0.13	0.74	1.57	2.09	9.05	0.48	1.26	99.76	n.a.	110	8.43	15.5	5.27	16.5	325	257	6.48	966	33.3	11.6	0.81	279	7.07	19.09	17.5	4.5	28.9	69.9	8.47	31.9	6.74	1.54	6.18	0.96	5.57	1.19	3.42	0.5	3.3	0.52
145	Awulale range	YX08G-1	Quartz Diorite	59.6	0.75	16.8	n.a.	n.a.	7.05	0.12	2.86	6.17	3.46	1.86	0.13	0.83	99.67	n.a.	173	18.4	32.7	8.27	19	57.5	311	n.a.	386	24.1	5.34	0.42	97.7	2.76	4.53	5.21	1.53	14.6	31.8	4.44	19.3	4.34	1.16	4.21	0.75	4.56	0.95	2.75	0.39	2.68	0.42
146	Awulale range	YX08G-2	Quartz Diorite	59.3	0.76	16.6	n.a.	n.a.	7.2	0.12	2.92	5.99	3.5	1.75	0.14	1.44	99.67	n.a.	220	22	36.4	11	24.1	63.4	393	n.a.	488	31.7	6.49	0.46	125	3.43	8.14	6.1	1.51	18.5	41.2	5.79	25.2	5.89	1.52	5.63	0.95	6.17	1.28	3.71	0.56	3.63	0.57
147	Awulale range	YX08G-3	Quartz Diorite	59.9	0.79	16.5	n.a.	n.a.	7.19	0.12	2.82	5.92	3.5	1.86	0.14	0.91	99.66	n.a.	173	18.7	29.9	6.48	18.7	58.7	303	n.a.	407	22.5	5.66	0.44	92.3	2.66	5.57	5.44	1.41	15.2	33.3	4.59	18.9	4.25	1.11	4	0.69	4.43	0.92	2.75	0.41	2.48	0.4
148	Awulale range	YX08G-4	Quartz Diorite	59.8	0.77	16.5	n.a.	n.a.	7.17	0.12	2.92	6.07	3.48	1.84	0.14	0.79	99.66	n.a.	176	16.6	32.8	7.94	18.4	56.1	306	n.a.	412	23.9	5.24	0.43	89.5	2.74	4.51	4.66	1.29	14.8	32.2	4.65	19.6	4.37	1.17	4.27	0.75	4.68	0.99	2.86	0.41	2.58	0.43
149	Awulale range	YX08G-5	Quartz Diorite	57.1	0.85	16.7	n.a.	n.a.	8.51	0.14	3.55	6.91	3.22	1.63	0.15	0.94	99.67	n.a.	219	24.4	43	13.9	19.7	59.3	329	n.a.	246	24.3	5.42	0.39	73.7	2.11	5.64	6.51	1.13	14.4	31.5	4.48	19	4.46	1.16	4.39	0.71	4.54	0.99	2.72	0.4	2.57	0.42
150	Awulale range	YX08G-6	Quartz Diorite	59.6	0.82	16.8	n.a.	n.a.	7.25	0.12	2.79	5.72	3.69	1.44	0.15	1.37	99.68	n.a.	165	14	37	5.88	18.8	39.4	310	n.a.	400	23.3	5.29	0.37	106	2.88	5.01	4.76	1.03	15.8	33.3	4.71	19.9	4.46	1.27	4.29	0.72	4.38	0.95	2.59	0.39	2.49	0.38
151	Awulale range	YX8-1	Quartz Diorite	59	0.76	16.4	n.a.	n.a.	7.14	0.15	3.11	6.57	3.47	1.78	0.14	1.37	99.9	n.a.	177	23.5	20.3	11.4	17.9	55.4	298	1.3	350	24.3	4.51	0.37	118	3.33	7.35	4.4	1.35	13.5	29.6	3.93	17.3	3.91	1.14	4.28	0.79	4.74	0.96	2.78	0.42	2.78	0.43
152	Awulale range	YX8-2	Quartz Diorite	60	0.75	16.5	n.a.	n.a.	6.73	0.15	2.87	6.15	3.58	1.96	0.13	1.17	99.91	n.a.	170	25.8	17.7	12.1	17.7	53.2	297	1.43	409	22.1	4.61	0.39	161	4.49	4.07	4.4	1.15	13.1	28.8	3.78	16.2	3.6	1.11	3.92	0.7	4.3	0.86	2.51	0.4	2.63	0.42
153	Awulale range	YX8-3	Quartz Diorite	59.6	0.7	16.4	n.a.	n.a.	6.97	0.15	3.05	6.51	3.46	1.86	0.14	1.02	99.92	n.a.	176	20.7	18.1	11.7	17.7	52.1	287	1.21	365	24.6	4.34	0.39	109	3.31	4.18	4.61	1.37	13.9	31.1	4.14	17.7	4.04	1.08	4.31	0.77	4.74	0.96	2.9	0.44	2.92	0.46
154	Awulale range	YX8-4	Quartz Diorite	59.8	0.74	16.6	n.a.	n.a.	6.95	0.14	2.85	6.35	3.59	1.7	0.12	1.16	99.91	n.a.	171	20.7	17.3	8.95	17.8	44.5	298	1.03	366	21.6	4.37	0.37	154	4.26	4.18	4.23	1.1	13.1	28.2	3.72	16	3.56	1.12	3.85	0.7	4.18	0.86	2.57	0.39	2.63	0.4
155	Awulale range	YX8-5	Quartz Diorite	59.1	0.74	16.3	n.a.	n.a.	7.05	0.14	3.07	5.98	3.9	1.95	0.12	1.48	99.9	n.a.	174	19.7	18	9.94	17.2	55.9	294	0.6	412	23.4	4.41	0.39	110	3.23	3.42	5.84	1.4	12.7	28.2	3.8	16.7	3.88	1.07	4.05	0.75	4.53	0.93	2.66	0.41	2.75	0.44
156	Awulale range	YX8-7	Quartz Diorite	59.5	0.7	16.5	n.a.	n.a.	7.07	0.14	2.97	6.55	3.45	1.88	0.12	1.1	99.92	n.a.	174	19.7	16.8	10.2	16.4	29.8	280	0.44	300	24.2	4.48	0.42	99.6	3.07	4.67	3.78	1.45	10.3	29.1	3.39	15	3.64	1.03	4.1	0.75	4.66	0.98	2.87	0.43	2.89	0.45
157	Awulale range	0945-1	Gabbro diorite	59.3119	0.81	15.65	n.a.	n.a.	7.68	0.15	3.76	5.96	3.07	2.2	0.18	1.45971	100.232	24.842	171.729	44.596	20.865	20.822	16.033	108.919	272.751	5.429	294.398	22.902	6.525	0.569	137.644	4.037	9.773	12.149	3.059	14.914	34.065	4.231	17.472	4.049	0.872	4.159	0.698	4.145	0.837	2.276	0.357	2.405	0.336
158	Awulale range	0945-2	Gabbro diorite	59.1927	0.81	15.75	n.a.	n.a.	7.71	0.15	3.76	5.82	3.04	2.35	0.18	1.09934	99.8621	24.708	178.921	44.997	21.261	21.323	16.278	117.41	274.009	5.957	331.238	25.024	6.722	0.579	170.123	5.013	10.042	13.398	4.03	16.125	36.633	4.655	19.026	4.411	0.932	4.526	0.78	4.696	0.937	2.574	0.387	2.625	0.371
159	Awulale range	0945-3	Gabbro diorite	59.2623	0.8	15.83	n.a.	n.a.	7.9	0.17	4.22	4.26	3.02	2.43	0.19	2.35811	100.44	26.271	182.7	49.49	21.8	23.11	15.4	132.667	256.2	2.279	289.444	25.95	5.638	0.541	178.8	5.354	8.313	13.11	1.732	17.01	40.3	5.106	21.059	4.704	0.912	4.745	0.834	4.964	1.011	2.956	0.498	3.344	0.486
160	Awulale range	0945-4	Gabbro diorite	58.5669	0.81	16.79	n.a.	n.a.	7.57	0.12	3.11	6.71	3.35	1.86	0.22	0.878594	99.9855	24.108	162.54	43.13	18.66	17	16.79	84.067	333.5	4.492	272.037	24.98	4.735	0.421	130.8	3.662	8.795	6.907	1.717	15.5	36.48	4.852	19.676	4.421	1.153	4.518	0.776	4.649	0.936	2.777	0.477	3.061	0.445
167	Awulale range	10CG04-1	Granite	72.08	0.24	13.78	n.a.	n.a.	0.4	0.01	0.11	0.73	1.02	10.42	0.03	0.979804	99.7998	n.a.	12.5862	2.3478	0.081708	6.9432	7.1337	217	54	0.84986	1349.2	33.48	9.2934	0.744175	202.8	6.49242	2.7552	13.046	2.10342	17.09	36.24	4.54	19.754	5.306	0.94006	5.74	1.05231	6.744	1.4066	4.296	0.69366	4.5171	0.70896
168	Awulale range	10CG04-3	Granite	76.6	0.2	11.79	n.a.	n.a.	0.66	0.01	0.09	0.77	2.52	6.17	0.03	0.859656	99.6997	n.a.	9.28472	2.78846	0.467535	3.92684	7.52275	116.816	31.1483	0.554899	566.088	23.2888	7.68966	0.597733	161.884	5.17428	2.39978	10.5975	2.12222	7.34446	16.6765	2.16549	9.51616	2.64119	0.341266	3.44989	0.694074	4.75291	1.03104	3.26168	0.549439	3.55072	0.552913
169	Awulale range	10CG12-1	Granite	64.7	0.53	14.37	n.a.	n.a.	4.61	0.11	2.61	5.77	1.88	3.15	0.08	1.7982	99.6082	18.4481	131.965	18.9781	4.6706	10.5072	15.4964	88.6359	345	0.605324	652.84	28.8549	7.3047	0.666242	155.687	4.8207	4.77599	13.8755	3.43761	20.7731	45.1201	5.42375	22.4179	5.26739	1.0802	5.7324	0.947521	5.92937	1.22182	3.68352	0.57986	3.68433	0.558193
170	Awulale range	10CG12-2	Granite	64.08	0.51	14.27	n.a.	n.a.	4.86	0.12	2.66	5.94	1.66	3.27	0.08	1.95922	99.4092	13.292	116.754	21.189	5.137	13.1318	13.3917	67.28	310.6	0.60104	694.6	23.14	6.5682	0.6018	134.08	4.25502	4.9488	10.758	3.0228	18.298	38.78	4.666	19.328	4.522	0.92334	4.882	0.81186	5.05	1.0444	3.134	0.50226	3.1668	0.48279
171	Awulale range	0939-1	Diorite	62.6667	0.6	15.18	n.a.	n.a.	6.44757	0.15	3.21	3.35	3.39	2.96	0.1	2.19692	100.214	n.a.	146.269	25.191	16.692	29.589	14.26	95.07	169.6	1.871	410.6	21.74	5.25	0.565	115.429	3.674	4.816	8.396	1.627	13.33	29.057	3.751	15.39	3.444	0.793	3.735	0.6459	3.929	0.832	2.448	0.383	2.509	0.389
172	Awulale range	0939-2	Diorite	61.388	0.62	15.44	n.a.	n.a.	7.0538	0.15	3.71	2.66	3.53	2.84	0.11	2.65628	100.114	n.a.	157.611	25.371	15.205	8.883	14.8	90.6	183.8	3.539	423.3	20.9	5.49	0.607	118.095	3.621	4.132	8.576	1.626	13.32	28.771	3.67	14.98	3.325	0.773	3.59	0.612	3.75	0.78	2.312	0.3612	2.396	0.3768
173	Awulale range	0939-3	Diorite	62.0039	0.58	15.61	n.a.	n.a.	6.3795	0.16	3.49	3.21	3.07	3.44	0.1	2.47703	100.481	n.a.	144.343	24.441	13.311	12.993	14.16	101.6	176.3	2.045	543.3	21.29	4.854	0.52	109.714	3.441	4.826	8.147	1.972	13.3	28.171	3.631	14.86	3.335	0.783	3.607	0.625	3.787	0.781	2.344	0.366	2.411	0.381
174	Awulale range	0939-4	Diorite	62.8581	0.63	15.14	n.a.	n.a.	6.61175	0.14	3.6	2.11	3.86	2.53	0.11	2.77833	100.326	n.a.	151.94	32.461	19.228	11.045	14.28	68.03	137.1	2.101	396.8	21.36	5.52	0.611	124.476	3.982	3.092	8.932	1.829	12.26	27.248	3.484	14.43	3.334	0.745	3.636	0.64	3.895	0.827	2.433	0.3801	2.501	0.388
175	Awulale range	0947-1	Granite	72.3	0.37	13.67	n.a.	n.a.	3.20136	0.04	0.71	1.33	4.47	4.91	0.1	0.359784	100.01	n.a.	61.73	16.75	7.15	13.33	13.11	297.714	148.3	4.289	409.074	25.41	7.757	0.906	320.8	9.606	9.836	44.71	8.747	26.539	58.7	6.882	25.461	4.929	0.678	4.537	0.7746	4.563	0.922	2.784	0.494	3.223	0.48
176	Awulale range	0947-3	Granite	72.26	0.44	13.58	n.a.	n.a.	2.76137	0.04	0.69	1.28	4.54	4.78	0.13	0.519584	100.18	n.a.	58.506	13.82	6.758	11.67	11.58	279.619	118.5	3.352	529.907	23.76	8.25	0.866	428.6	11.96	8.244	46.62	6.288	16.882	42.7	5.573	22.657	4.795	0.691	4.509	0.765	4.421	0.888	2.63	0.463	2.972	0.433
177	Awulale range	0947-4	Granite	74.07	0.37	13	n.a.	n.a.	3.16126	0.04	0.73	1.58	4.71	3.63	0.1	0.479616	99.9396	n.a.	61.688	18.19	7.81	19.94	13.1	317.905	136.6	6.887	410.093	25.17	7.675	0.917	320.7	9.749	11.9	47.18	10.51	19.882	47.07	5.833	22.765	4.685	0.677	4.48	0.776	4.556	0.928	2.809	0.485	3.295	0.486
178	Awulale range	0947-5	Granite	76.69	0.22	11.63	n.a.	n.a.	3.31117	0.03	0.74	2.04	5.18	1.85	0.06	0.519792	99.8898	n.a.	62.685	17.59	7.046	14.47	13.12	277.81	144.9	3.893	372.315	26.58	7.891	0.991	336.5	10.69	28.83	46.61	9.686	21.412	50.66	6.189	24.098	4.957	0.692	4.752	0.83	4.959	1.017	3.042	0.534	3.632	0.541
179	Awulale range	0947-6	Granite	78.3	0.21	11.28	n.a.	n.a.	3.18087	0.02	0.35	1.37	5.05	1.92	0.04	0.579305	99.6393	n.a.	60.785	18.25	6.865	9.333	12.58	258.857	151.6	2.998	373.056	26.41	7.906	1.019	319	10.43	27.63	60.42	10.21	22.725	52.42	6.397	24.569	5.107	0.697	4.965	0.85	5.099	1.038	3.146	0.548	3.717	0.563
180	Awulale range	0941-6	Granite	71.5	0.22	15.59	n.a.	n.a.	1.34118	0.04	0.81	0.63	8.08	0.31	0.07	0.819672	99.4097	n.a.	18.575	7.131	3.398	2.777	16.39	3.733	54.54	0.056	16.1	2.493	0.567	0.053	94.124	2.703	0.501	0.341	0.179	4.792	11.276	1.688	7.016	1.486	0.497	1.1	0.137	0.613	0.097	0.25	0.036	0.227	0.034
181	Awulale range	0941-7	Granite	71.87	0.21	15.52	n.a.	n.a.	1.2711	0.04	0.77	0.71	8.05	0.34	0.07	0.839329	99.6893	n.a.	17.355	6.081	3.211	5.047	15.65	5.991	56.08	0.068	17.6	2.498	0.544	0.055	89.467	2.608	0.588	0.371	0.182	5.38	12.524	1.817	7.562	1.556	0.52	1.124	0.136	0.608	0.097	0.254	0.035	0.22	0.033
182	Awulale range	0941-8	Granite	73.29	0.2	14.67	n.a.	n.a.	1.3711	0.04	0.76	0.96	7.21	0.55	0.07	0.819017	99.939	n.a.	n.a.	n.a.	n.a.	n.a.	n.a.	n.a.	n.a.	n.a.	n.a.	n.a.	n.a.	n.a.	n.a.	n.a.	n.a.	n.a.	n.a.	n.a.	n.a.	n.a.	n.a.	n.a.	n.a.	n.a.	n.a.	n.a.	n.a.	n.a.	n.a.	n.a.	n.a.
183	Awulale range	0941-9	Granite	72.22	0.22	15.6	n.a.	n.a.	1.59136	0.05	0.97	0.72	7.12	0.89	0.07	1.03896	100.489	n.a.	17.655	8.231	4.154	9.066	15.79	25.35	150.5	0.224	109.3	2.801	0.553	0.05	91.438	2.658	1.504	0.3818	0.1953	4.213	10.39	1.608	7.128	1.683	0.452	1.247	0.152	0.655	0.106	0.271	0.038	0.231	0.035
184	Awulale range	0941-10	Granite	70.36	0.23	15.77	n.a.	n.a.	1.75159	0.05	1.1	0.75	7.36	0.86	0.08	1.05979	99.3698	n.a.	18.29	7.101	4.715	2.013	15.87	25.16	116.3	0.177	94.44	2.642	0.5916	0.05	94.267	2.72	1.533	0.376	0.197	6.194	13.829	2.177	9.073	1.904	0.462	1.299	0.153	0.646	0.102	0.261	0.036	0.222	0.034
185	Awulale range	16F-68	Monzonite	55.1295	0.837482	18.0803	n.a.	n.a.	7.09161	0.173827	1.99842	3.31223	3.74256	6.55011	0.577964	2.28	99.774	n.a.	n.a.	n.a.	n.a.	n.a.	n.a.	284.918	423.085	n.a.	651.783	22.5408	9.84569	0.653374	225.99	5.66943	n.a.	16.9565	3.19984	31.397	64.2777	8.43909	30.2164	6.45578	1.54845	5.35696	0.843256	4.56821	0.915207	2.63015	0.394237	2.62407	0.401215
186	Awulale range	16F-69	Monzonite	55.9955	0.79332	17.9167	n.a.	n.a.	7.04505	0.155777	1.9919	4.27706	3.81195	5.89843	0.57993	1.34	99.8056	n.a.	n.a.	n.a.	n.a.	n.a.	n.a.	215.586	488.252	n.a.	521.659	27.2885	9.10788	0.625112	193.669	5.13208	n.a.	17.7188	3.02932	35.2625	72.9704	9.70443	35.6062	7.15458	1.66763	6.35858	1.01022	5.48741	1.09539	3.13164	0.476257	3.15676	0.485426
187	Awulale range	16F-70	Monzonite	55.303	0.778857	18.6825	n.a.	n.a.	6.63414	0.141921	2.01526	4.45951	3.72324	5.88682	0.554043	1.61	99.7894	n.a.	n.a.	n.a.	n.a.	n.a.	n.a.	232.167	505.945	n.a.	555.896	24.9524	7.86711	0.466587	164.915	4.18789	n.a.	13.8715	2.64993	33.2949	68.8377	9.25268	33.4253	7.1469	1.66957	5.94545	0.927316	5.00038	0.994914	2.8189	0.417257	2.762	0.418376
188	Awulale range	F36	Monzonite	57.0105	0.947588	17.2248	n.a.	n.a.	7.45994	0.144271	1.82413	4.50506	3.47978	5.68221	0.590796	0.98	99.849	n.a.	n.a.	n.a.	n.a.	n.a.	n.a.	224.9	442	n.a.	555.9	28.21	11.49	0.661757	242.4	6.46	n.a.	18.7882	4.09882	38.7333	82.7263	10.6878	43.6556	8.24941	1.70444	6.77263	1.06553	5.71412	1.13659	3.21765	0.486471	3.19647	0.493059
189	Awulale range	F37	Monzonite	57.3646	0.939931	17.0489	n.a.	n.a.	7.57247	0.151262	1.72058	4.25616	3.58513	5.64714	0.521	1.04	99.8471	n.a.	n.a.	n.a.	n.a.	n.a.	n.a.	230.702	407.349	n.a.	523.576	27.8431	12.113	0.769382	238.405	6.26718	n.a.	20.0367	4.12665	38.9837	82.0916	10.7279	43.0069	8.09574	1.65913	6.63825	1.04203	5.62214	1.12147	3.18235	0.484316	3.2392	0.495306
190	Awulale range	F38	Monzonite	57.8754	1.0282	16.5771	n.a.	n.a.	7.82829	0.177241	1.74597	2.55872	3.5147	7.1289	0.620735	0.78	99.8352	n.a.	n.a.	n.a.	n.a.	n.a.	n.a.	284.556	353.066	n.a.	681.286	29.9693	11.4331	0.684831	233.231	6.04336	n.a.	19.1603	3.56695	38.8813	84.6446	11.0309	44.3145	8.61379	1.80603	7.07801	1.10639	5.97309	1.18143	3.33078	0.494245	3.23912	0.484649
191	Awulale range	F39	Monzonite	56.9528	0.932777	17.977	n.a.	n.a.	6.98322	0.116867	1.73531	4.01933	3.62826	5.82019	0.571965	1.1	99.8377	n.a.	n.a.	n.a.	n.a.	n.a.	n.a.	n.a.	n.a.	n.a.	n.a.	n.a.	n.a.	n.a.	n.a.	n.a.	n.a.	n.a.	n.a.	n.a.	n.a.	n.a.	n.a.	n.a.	n.a.	n.a.	n.a.	n.a.	n.a.	n.a.	n.a.	n.a.	n.a.
192	Awulale range	F40	Monzonite	56.8169	0.975185	16.9678	n.a.	n.a.	8.03734	0.152146	1.67271	3.50402	3.67983	6.30614	0.621303	1.1	99.8334	n.a.	n.a.	n.a.	n.a.	n.a.	n.a.	260.927	376.093	n.a.	664.447	30.599	11.554	0.661757	248.899	6.39682	n.a.	19.4086	3.49303	38.7117	84.7678	11.2133	44.4449	8.66707	1.71902	7.10921	1.12039	6.09642	1.20671	3.44034	0.508949	3.3785	0.516508
193	Awulale range	F41	Monzonite	59.8172	1.00913	15.9644	n.a.	n.a.	7.73933	0.137857	0.725395	2.19607	4.64136	6.14824	0.603342	0.86	99.8423	n.a.	n.a.	n.a.	n.a.	n.a.	n.a.	223.404	220.785	n.a.	709.973	27.9013	10.6606	0.60699	230.012	5.90847	n.a.	19.6334	4.05558	36.8428	76.5019	10.8594	43.3149	7.88741	1.69803	6.74934	1.04897	5.62568	1.11121	3.12503	0.46563	3.0855	0.475283
205	Awulale range	PM2-1-1	Biotite granite	69.384	0.385	14.571	n.a.	n.a.	3.05	0.09	0.892	1.905	4.335	3.882	0.125	1.35	100.011	7.41754	33.7677	3.80007	2.89672	0.764917	n.a.	123.232	205.06	0.650982	699.721	27.6882	8.18648	0.636499	166.251	4.60432	3.33477	8.07489	1.53829	20.3074	42.0426	5.04694	19.7468	4.11818	0.953337	3.82163	0.647769	4.05689	0.914439	2.66612	0.440577	2.97789	0.481258
206	Awulale range	YT-1	Biotite granite	70.72	0.356	14.624	n.a.	n.a.	2.805	0.087	0.785	2.011	4.017	3.81	0.11	0.73	100.068	7.84941	34.6452	3.21165	3.81078	1.10176	n.a.	117.894	209.463	0.848227	732.98	29.5948	7.78341	0.659562	182.581	4.8635	3.51184	8.64409	1.5988	34.829	70.9541	8.24573	31.1329	6.11598	1.03631	5.27907	0.813222	4.61048	0.97122	2.8094	0.454309	2.988	0.493704
207	Awulale range	YT-2	Biotite granite	70.713	0.375	14.67	n.a.	n.a.	2.93	0.084	0.833	1.783	4.185	3.841	0.117	1.02	100.569	6.97127	32.2087	3.64755	2.24319	0.910699	n.a.	119.572	240.287	1.06202	686.418	26.735	7.60275	0.620154	175.158	4.82769	4.5744	9.06245	1.72614	23.0604	47.7853	5.68664	21.7584	4.45627	0.951184	4.12845	0.672837	4.01293	0.87724	2.54281	0.42462	2.86912	0.463832
208	Awulale range	YT-3	Biotite granite	70.364	0.377	14.654	n.a.	n.a.	3.101	0.095	0.878	1.996	3.949	3.821	0.12	1.53	100.898	6.94248	34.5019	4.208	2.31855	34.4732	n.a.	122.317	241.755	1.10986	688.081	26.4967	7.78341	0.620154	160.314	4.46962	4.697	8.58433	1.80093	17.5242	35.6822	4.26492	16.6621	3.56495	0.898606	3.37009	0.585097	3.68925	0.850733	2.49838	0.415902	2.7978	0.463832
209	Awulale range	YT-4	Biotite granite	70.265	0.362	14.728	n.a.	n.a.	2.846	0.082	0.801	1.853	4.206	3.874	0.114	1.18	100.317	6.8561	33.0686	3.84993	2.45421	0.883856	n.a.	119.419	222.674	0.936436	723.002	24.5902	7.27428	0.576599	164.767	4.45172	3.92052	8.50464	1.38454	21.215	43.9815	5.14954	19.7136	3.96451	0.918636	3.6316	0.602645	3.66436	0.812177	2.3873	0.388333	2.65515	0.425688
210	Awulale range	QJ-14	Albite porphyry	70.83	0.5	14.17	1.2	n.a.	3.22	0.066	0.44	0.65	5.43	3.99	0.075	0.58	99.951	8.3	26.7	10.2	3.79	17	17.8	86.8	66.6	0.514	467	43.7	21.8	1.39	919	20.5	3.83	15.2	4.06	45.3	92.2	11	39.6	7.97	1.66	6.88	1.36	7.43	1.59	4.52	0.754	5.69	0.927
211	Awulale range	QJ-15	Albite porphyry	70.44	0.51	13.97	1.5	n.a.	3.66	0.074	0.49	0.68	5.35	3.88	0.077	0.82	99.951	8.58	27.3	4.71	3.59	4.36	18.1	86	68.3	0.509	448	45.9	21.5	1.37	900	20.1	3.89	14.2	3.56	46.1	95.6	11	40.9	8.02	1.67	7.13	1.37	7.8	1.68	4.99	0.828	5.36	0.952
212	Awulale range	QJ-16	Albite porphyry	70.93	0.5	13.86	1.05	n.a.	2.88	0.066	0.35	1.01	5.04	4.35	0.07	0.89	99.946	8.15	25.7	3.31	2.34	3.12	16.6	97.3	73.4	0.566	513	44.5	21.1	1.33	906	19.8	4.19	15	4.96	43	90.4	10.5	39.1	7.86	1.49	6.9	1.33	7.17	1.57	4.62	0.823	5.44	0.85
213	Awulale range	QJSY-28	Albite porphyry	70.42	0.49	14.06	1.15	n.a.	3.03	0.047	0.21	1.07	5.11	4.43	0.065	1.01	99.942	8.26	24.7	3.24	2.23	3.06	16.5	96.2	40.6	0.712	550	41.9	21.8	1.37	929	20.2	4.5	15	4.07	31	78.3	9.86	37	7.62	1.56	6.54	1.32	6.94	1.51	4.65	0.765	5.28	0.899
214	Awulale range	QJSY-29	Albite porphyry	70.85	0.51	14.36	0.7	n.a.	2.55	0.034	0.17	0.85	5.39	4.36	0.067	0.79	99.931	7.87	22.5	2	2.87	3.42	17.4	88.9	39.7	0.673	553	42.6	21.2	1.37	892	20.8	4.29	14.8	3.87	39.7	91.5	10.8	40.9	7.88	1.48	6.74	1.29	7.43	1.55	4.78	0.838	5.49	0.928
215	Awulale range	QJSY-31	Albite porphyry	72.15	0.48	13.84	1.35	n.a.	3.03	0.038	0.2	0.53	5.47	3.77	0.065	0.36	99.933	8.09	21.4	3.93	2.11	4.84	16.5	79.7	32.8	0.57	381	36.2	21.6	1.39	888	19.9	3.91	14.7	3.48	47.8	97.3	11.5	38.4	6.18	1.36	6.18	1.19	5.75	1.39	4.52	0.755	4.98	0.946
216	Awulale range	QJSY-32	Albite porphyry	71.14	0.49	13.84	1.3	n.a.	3.21	0.055	0.25	0.62	4.5	5.19	0.066	0.6	99.961	8.13	22.2	2.53	2.54	3.23	17.3	120	41	0.953	646	46.9	21.9	4	922	20.9	4	15.4	3.86	45.4	90.8	10.9	41.5	7.9	1.61	7.09	1.38	7.67	1.54	4.97	0.851	5.23	0.882
217	Awulale range	QJG-7	Adakite	59.79	0.58	17.41	n.a.	n.a.	4.59	0.06	2.21	3.99	5.08	2.55	0.32	2.07	98.65	7.67	76.1	29.1	12.6	19.7	n.a.	35.8	1261	5.59	878	6.18	7.23	0.34	127	2.98	6.7	1.29	0.43	23.3	50.9	6.16	24	3.67	0.94	2.16	0.28	1.4	0.26	0.63	0.08	0.49	0.07
218	Awulale range	QJG-8	Adakite	59.1	0.58	17.82	n.a.	n.a.	4.74	0.04	1.44	3.05	6.84	3.42	0.34	1.43	98.8	8.28	90.4	35.1	10.4	18.2	n.a.	50.3	1268	4.28	765	6.49	7.97	0.36	136	3.03	5.4	1.38	0.65	26.1	55.7	6.71	25.8	3.96	1.03	2.42	0.29	1.5	0.28	0.64	0.08	0.52	0.08
219	Awulale range	QJG-9	Adakite	58.53	0.56	16.93	n.a.	n.a.	4.57	0.05	1.45	4.46	6.3	3.25	0.32	2.56	98.98	7.74	80.5	31.8	12.6	18.7	n.a.	44.3	1061	5.75	928	6.05	7.19	0.33	124	2.73	6.34	1.19	0.54	23.2	50.5	6.06	23.5	3.51	0.89	2.05	0.26	1.34	0.24	0.59	0.08	0.47	0.07
220	Awulale range	QJG-10	Adakite	58.1	0.52	15.91	n.a.	n.a.	4.43	0.05	1.39	5.85	6.28	2.6	0.31	3.6	99.04	6.39	58.7	30.6	10.2	16.6	n.a.	41.8	913	3.44	872	5.68	6.8	0.31	115	2.66	5.33	1.16	0.48	23.1	50.3	5.91	22.8	3.45	0.88	2.03	0.26	1.25	0.23	0.57	0.08	0.47	0.07
221	Awulale range	QJG-11	Adakite	59.77	0.58	17.94	n.a.	n.a.	5	0.06	1.79	4.87	5.57	2.55	0.34	1.42	99.8	8.22	83.9	27.6	13.1	19.3	n.a.	31.3	1329	4.51	661	6.36	7.33	0.34	129	2.93	7.33	1.29	0.5	25.7	55	6.67	25.6	3.89	1.05	2.3	0.3	1.45	0.26	0.63	0.09	0.51	0.07
222	Awulale range	13QJ-2B	Adakite	59.33	0.55	16.93	n.a.	n.a.	4.62	0.06	1.25	4.93	5.78	2.91	0.34	2.08	98.78	10.3	89.8	21.7	10.8	18.2	n.a.	55.2	1428	6.87	683	6.3	7.38	0.34	133	3.19	6.4	1.28	0.53	26.5	55.3	6.82	25.4	3.8	1.05	2.69	0.29	1.42	0.25	0.62	0.09	0.52	0.08
223	Awulale range	13QJ-2C	Adakite	59.72	0.54	17.01	n.a.	n.a.	4.69	0.05	1.33	4.89	5.54	2.86	0.34	1.87	98.84	10.5	89.8	23.3	11.4	18.4	n.a.	63	1438	7.72	668	6.24	7.49	0.34	135	3.2	6.31	1.29	0.54	26.8	55.5	6.91	25.7	3.84	1.07	2.77	0.3	1.43	0.25	0.62	0.08	0.53	0.08
224	Awulale range	13QJ-2D	Adakite	59.03	0.56	17.59	n.a.	n.a.	4.93	0.06	1.36	3.81	7.2	3.03	0.37	1.78	99.72	11	91.1	18.5	10.5	19.4	n.a.	43.6	1203	2.4	748	6.79	7.44	0.34	137	3.26	6.96	1.35	0.67	28.4	58	7.09	26.7	4.02	1.11	2.91	0.31	1.5	0.28	0.67	0.09	0.56	0.08
225	Awulale range	13QJ-2E	Adakite	59.76	0.55	17.18	n.a.	n.a.	4.73	0.06	1.2	4.77	5.77	2.93	0.34	1.8	99.09	10.5	90.4	30.1	10.4	17.6	n.a.	54.3	1443	6.77	709	6.42	7.56	0.35	144	3.37	6.42	1.36	0.58	27.3	56.9	6.97	26	3.86	1.08	2.77	0.3	1.45	0.26	0.64	0.08	0.54	0.08
226	Awulale range	13QJ-2F	Adakite	59.61	0.56	17.5	n.a.	n.a.	4.91	0.06	1.46	3.46	6.86	3.22	0.36	1.77	99.77	10.6	97.6	22.5	11.4	19.5	n.a.	49.1	1219	4.43	729	6.47	7.45	0.32	136	3.28	7.13	1.31	0.64	21.1	55.9	6.9	25.8	3.89	1.07	2.8	0.31	1.49	0.27	0.64	0.09	0.55	0.08
227	Awulale range	ZXT-35	Adakite	66.46	0.33	15.94	n.a.	n.a.	2.62	0.03	0.92	2.11	4.4	4.86	0.12	1.95	99.74	5.33	48.2	6.79	4.67	6.86	n.a.	83.1	167	2.16	651	4.18	2.26	0.15	85.6	2.52	10.4	2.08	0.82	15.2	31.9	3.84	14.1	2.27	0.69	1.58	0.17	0.84	0.15	0.37	0.05	0.35	0.05
228	Awulale range	ZXT-36	Adakite	66.37	0.33	16.26	n.a.	n.a.	2.6	0.03	0.91	2.2	4.92	4.18	0.11	1.86	99.77	5.11	48.5	7.44	5.03	6.88	n.a.	73.5	432	3.2	557	4.09	2.25	0.15	84.1	2.39	11	2.06	0.78	14.9	31	3.81	13.5	2.22	0.66	1.52	0.17	0.82	0.15	0.36	0.05	0.34	0.05
229	Awulale range	06XJ69	Monzonite granite	68.92	0.32	15.08	n.a.	n.a.	3.62	0.03	1.01	4.79	3.35	0.96	0.03	1.5	99.6	6.92	62.7	15.2	6.11	5.49	12.6	35.6	323	0.99	104	22.2	4.57	0.35	138	4.1	2.45	8.11	2.14	18.5	36.7	4.53	16.5	3.43	0.79	3.39	0.62	3.73	0.81	2.33	0.35	2.43	0.39
230	Awulale range	06XJ71	Monzonite granite	72.19	0.24	14.3	n.a.	n.a.	2.71	0.02	0.57	2.09	3.38	3.76	0.01	0.88	100.15	4.22	37.9	10.8	4.31	3.22	11.8	98.1	177	1.04	706	17.8	4.67	0.6	105	3.89	7.6	7.09	1.37	9.5	18.3	2.12	7.65	1.7	0.57	1.9	0.4	2.81	0.63	1.93	0.33	2.28	0.35
231	Awulale range	06XJ72	Monzonite granite	69.56	0.34	15.49	n.a.	n.a.	2.24	0.02	1.31	6.34	3.63	0.34	0.03	0.77	100.06	9.37	54.9	7.98	3.6	4.81	13	8.19	356	0.31	72.9	22.7	5.78	0.49	89.9	3	2.34	6.72	1.04	11.6	26.2	3.25	12.8	2.83	0.56	3.03	0.56	3.55	0.79	2.27	0.37	2.52	0.41
232	Awulale range	06XJ79-1	Monzonite granite	73.8	0.22	14.61	n.a.	n.a.	1.08	0.02	0.54	7.92	1.55	0.18	0.04	0.53	100.47	3.06	21.9	8.13	1.47	6.13	10.4	4.9	263	0.3	50.4	26.1	4.84	0.44	122	3.91	1.19	4.41	0.58	7.69	19.5	2.45	10.1	2.7	0.31	3.05	0.63	4.12	0.93	2.77	0.44	2.9	0.44
233	Awulale range	06XJ-78	Monzonite granite dike	70.4	0.24	15.38	n.a.	n.a.	2.39	0.04	0.62	3.01	5.08	0.89	0.01	1.45	99.49	4.31	39.5	10.4	3.77	4.7	12.4	29.4	204	0.21	136	24	5.71	0.68	108	3.67	4.65	9.94	2.76	24.8	52.3	5.73	20.1	3.77	0.7	3.72	0.61	3.83	0.8	2.44	0.4	2.69	0.43
234	Awulale range	06XJ-74	Monzonite granite dike	76.58	0.07	12.96	n.a.	n.a.	1.07	0.02	0.03	3.36	3.21	1.13	0	1.1	99.52	2.07	6.7	14.4	1.19	3.34	9.4	32.3	161	0.44	166	19.6	9	1.28	119	5.02	3.29	21	2.02	6.82	17.1	1.86	6.9	1.78	0.09	2.14	0.41	2.77	0.62	1.94	0.33	2.39	0.4
235	Awulale range	06XJ-75	Monzonite granite dike	65.2	0.67	17.24	n.a.	n.a.	1.97	0.04	1.52	8.9	2.68	0.31	0.22	1.57	100.31	13.8	28.8	16.3	2.47	6.25	14.9	6.87	374	0.42	108	39.1	4.06	0.28	105	3.26	2.03	2.3	1.06	23.7	49.9	6.59	26.6	6.05	1.15	5.78	1.07	6.61	1.41	3.99	0.62	4.17	0.64
247	Awulale range	NL07-16	Granite	72.23	0.73	14.52	n.a.	n.a.	1.39	0.1	0.71	3.6	3.26	3.44	0.12	0.6	100.7	7.33	67.41	7.5	3.59	1.73	14.39	73.3	251.3	2.63	1255	17.65	11.68	1.18	345.3	9.31	15.62	4.82	2.13	11.79	21.52	2.78	10.71	2.28	0.9	2.34	0.45	3.06	0.69	2.03	0.34	2.45	0.4
248	Awulale range	QS-16	Granite porphyry	72.59	0.23	14.76	0.8	1.14904	n.a.	0.017	0.68	0.88	9.25	0.07	0.107	0.13	100.533	3.08	51.8	10.3	1.36	5.76	18	1.12	36.8	0.024	22.8	9.22	5.27	0.366	140	3.9.0	40.6	2.14	0.641	11.5	24.2	3.08	12	2.22	0.37	1.93	0.33	1.7	0.33	0.9	0.15	0.96	0.14
249	Awulale range	QS-17	Granite porphyry	71.17	0.19	15.06	1.55	2.52752	n.a.	0.036	0.68	0.87	8.86	0.27	0.07	0.15	101.284	4.5	69.7	12	2.52	7.49	18.8	5.29	103	0.07	128	8.14	5.89	0.396	92.2	2.99	15.2	2.58	0.837	16.4	33.4	3.71	13.5	1.92	0.63	1.67	0.3	1.66	0.28	0.99	0.15	0.88	0.14
250	Awulale range	QS-18	Granite porphyry	71.91	0.19	15.19	0.75	1.15847	n.a.	0.024	0.68	0.89	9.05	0.2	0.067	0.5	100.109	4.12	48.5	9.99	1.65	3.77	17.4	3.43	83.1	0.057	97.3	7.54	5.47	0.421	89.1	2.67	3.11	2.42	1.06	15.6	30.7	3.35	12	1.85	0.58	1.74	0.27	1.51	0.25	0.77	0.12	0.88	0.1
251	Awulale range	QS-19	Granite porphyry	71.55	0.22	15.2	0.55	1.10622	n.a.	0.024	0.79	0.93	9.17	0.2	0.083	0.58	99.8232	4.58	44.5	13	1.66	4.03	18.5	4.46	45	0.078	117	8.05	4.5	0.417	124	3.41	14.9	2.23	1.64	17.5	33.9	3.27	11.2	2.04	0.6	1.58	0.25	1.41	0.27	0.8	0.14	0.87	0.12
252	Awulale range	QS-20	Granite porphyry	71.3	0.2	15.36	0.65	1.01734	n.a.	0.02	0.74	0.96	9.28	0.28	0.073	0.63	99.8803	4.68	75.5	14.7	1.52	5.31	19.2	7.1	52.1	0.105	167	9.12	5.86	0.453	136	3.82	8.41	2.39	1.35	20.2	46.2	5.22	18.4	2.91	0.73	2.2	0.34	1.69	0.29	0.88	0.13	0.93	0.11
253	Awulale range	QS-21	Granite porphyry	72.05	0.21	15.05	0.8	1.22904	n.a.	0.023	0.71	0.73	9.39	0.08	0.086	0.31	100.358	4.28	112	15.7	1.52	5.43	19.8	1.12	38.2	0.081	75.9	6.11	5.14	0.394	150	3.99	1.31	2.51	0.678	10.3	21.8	2.42	9.27	1.57	0.44	1.36	0.22	1.15	0.18	0.6	0.12	0.64	0.1
254	Awulale range	11WL01-1h	Granite porphyry	71.04	0.19	15.26	1.07	2.19909	n.a.	0.04	1.33	0.72	5.33	2.72	0.07	1.18	100.95	4.09	28.3	n.a.	4.04	2.06	17.4	39.6	327	n.a.	546	5.98	6.11	0.41	84.3	2.46	3.94	2.27	1.01	17.7	30.1	3.32	11.2	1.65	0.66	1.38	0.18	1.05	0.22	0.65	0.085	0.54	0.098
255	Awulale range	11WL01-2h	Granite porphyry	71.04	0.19	15.2	0.98	2.12907	n.a.	0.04	1.16	0.76	5.41	2.88	0.06	1.17	100.91	2.5	29.1	n.a.	4.37	4.74	16.6	24.9	115	n.a.	367	3.73	4.99	0.3	86	2.53	1.59	0.75	0.78	6.4	10.8	1.28	4.71	0.79	0.28	0.64	0.1	0.72	0.11	0.36	0.062	0.44	0.067
256	Awulale range	11WL01-3h	Granite porphyry	70.79	0.2	15.24	0.96	2.23685	n.a.	0.04	1.2	0.79	5.31	2.82	0.07	1.12	100.63	4.26	30.8	n.a.	4.01	2.22	17.9	40.3	334	n.a.	642	6.43	6.26	0.42	88.3	2.64	3.68	2.04	1.06	16.4	28.3	3.17	10.8	1.67	0.58	1.37	0.19	1.08	0.24	0.67	0.1	0.66	0.12
257	Awulale range	11WL01-4h	Granite porphyry	71.24	0.2	15.34	1.14	2.29688	n.a.	0.04	0.87	0.72	7.57	0.42	0.07	1.09	100.61	3.97	34	n.a.	4.37	4.73	18.2	8.12	156	n.a.	190	6.16	6.01	0.4	88.1	2.49	13.6	1.96	0.68	10.9	22.6	2.74	9.72	1.83	0.51	1.27	0.18	1.08	0.23	0.57	0.093	0.61	0.1
258	Biezhentao range	06XJ-04	Dacite	63.95	0.94	14.6	5.55	n.a.	n.a.	0.05	1.72	3.02	3.11	3.14	0.11	2.69	99.49	15.27	88.17	32.16	13.48	14.35	18.25	87.56	213.2	3.945	641.2	38.21	8.725	0.496	277.1	5.644	10.72	7.57	1.817	23.77	52.13	6.636	26.8	5.804	1.028	5.37	0.972	5.807	1.204	3.416	0.508	3.067	0.466
259	Biezhentao range	06XJ-05	Dacite	62.18	0.71	15.41	6.38	n.a.	n.a.	0.02	2.82	0.33	3.99	5.53	0.05	1.5	99.64	14.83	102.4	53.84	0.859	39.48	16.99	458.9	207.8	76.95	475.7	19.85	7.209	0.432	138	2.964	4.969	5.07	1.259	7.887	16.93	2.219	8.434	1.969	0.543	1.982	0.414	2.833	0.624	1.859	0.295	1.861	0.277
260	Biezhentao range	06XJ-06	Dacite	62.5	0.66	16.02	4.91	n.a.	n.a.	0.1	3.25	4.16	3.17	2.24	0.09	2.25	99.92	10.72	97.97	66.68	17.19	51.73	17.64	61.73	393.7	4.674	313.6	19.34	6.886	0.425	133.7	2.983	8.23	4.576	1.089	13.17	28.06	3.647	14.44	3.164	0.768	2.981	0.517	2.986	0.635	1.731	0.262	1.648	0.232
261	Biezhentao range	Dbt-24	Dacite	62.26	0.61	15.41	2.96	1.55	n.a.	0.1	2.77	4.63	3.22	1.78	0.13	1.6	99.5	12.7	82.1	51.9	15	39.1	19.1	54.9	551	6.96	343	25.6	8.34	0.6	155	4.24	14.8	5.85	1.53	18.1	39	3.99	18.4	4.05	1.06	3.8	0.6	4.19	0.84	2.47	0.3	2.23	0.34
262	Biezhentao range	Dbt-25	Dacite	63.62	0.65	15.82	2.46	2.16	n.a.	0.11	2.96	3.6	3.85	2.41	0.14	0.5	100.1	14.1	85.3	57.4	16.5	44.3	20.1	81.1	479	6.81	343	25.6	7.9	0.62	158	4.12	13.6	5.9	1.48	18.3	38.9	4.08	18.5	4.22	1.04	3.99	0.66	4.23	0.87	2.5	0.36	2.37	0.35
263	Biezhentao range	Dbt-26	Dacite	64.38	0.52	15.48	1.83	2.11	n.a.	0.1	2.3	4.53	3.35	2.37	0.12	0.96	99.89	11.7	65.7	43.5	13.4	32.8	20.6	64.3	366	2.99	348	24.1	8.69	0.67	162	4.26	14.7	7.01	1.71	18.9	40.4	4.12	18.2	4.04	1.06	3.87	0.64	3.9	0.79	2.37	0.35	2.13	0.33
264	Biezhentao range	Dbt-27	Dacite	63.31	0.63	15.83	2.48	2.1	n.a.	0.11	2.79	4.07	3.42	2.4	0.13	0.68	100.15	13.9	86.7	58.3	17	47.3	20.8	80.9	513	5.92	337	24.3	7.46	0.65	154	4.15	12.8	5.77	1.49	17.1	36.8	3.87	17.5	3.99	0.99	3.85	0.62	3.91	0.8	2.34	0.33	2.19	0.33
265	Biezhentao range	Dbt-28	Dacite	63.09	0.64	15.9	2.42	2.13	n.a.	0.11	2.82	4.08	3.5	2.4	0.13	0.77	100.05	13.4	79.6	54.1	15.8	41.6	21	90.4	522	4.88	431	25.5	7.97	0.85	159	4.3	13	6.3	1.57	18.2	39.4	4.13	18.7	4.3	1.05	4.12	0.69	4.19	0.84	2.44	0.35	2.32	0.34
266	Biezhentao range	Db-4	Dacite	62.35	0.67	15.39	2.91	2.24	n.a.	0.11	3.16	4.44	2.92	1.68	0.14	1.54	99.85	10.7	98.6	50.8	16.3	33.5	17.6	52.8	267	3.75	568	25.2	7.34	1.22	163	4.44	80.2	7.01	1.36	18.6	41.1	4.68	18.5	4.23	1.06	3.71	0.72	4.26	0.87	2.72	0.38	2.42	0.37
267	Biezhentao range	Db-5	Dacite	62.12	0.67	15.23	2.89	2.15	n.a.	0.11	3.3	2.75	3.61	1.99	0.13	1.19	99.34	8.82	97.1	40.9	14.1	31.1	16.6	53.5	259	4.72	260	23.9	6.84	1.09	155	4.29	18.6	5.75	1.08	17.3	39.1	4.45	18.1	4.13	0.93	3.73	0.67	4.06	0.83	2.57	0.3	2.39	0.36
268	Biezhentao range	Db-6	Dacite	62.68	0.66	15.71	3.11	1.86	n.a.	0.12	3.11	3.94	3.34	2.38	0.14	1.19	100.1	9.82	91.4	49	14.7	41.5	17.2	74.8	403	4.87	337	25	6.97	1.14	166	4.53	16.3	6.79	1.45	18.6	41.1	4.68	19	4.27	1.04	3.94	0.7	4.34	0.86	2.66	0.37	0.41	0.37
269	Biezhentao range	Db-11	Dacite	62.85	1.05	14.63	0.93	5.72	n.a.	0.09	1.8	3.32	3.78	2.96	0.17	1.19	99.81	12	86.3	15.4	13	6.36	17.7	81.8	182	2.92	417	39	7.63	1.25	253	6.7	15.8	7.64	1.18	22.4	50.6	5.98	24.6	5.74	1.26	5.34	1.05	6.63	1.36	4.14	0.57	3.91	0.58
270	Biezhentao range	Db-12	Dacite	64.3	0.98	14.99	0.83	5.49	n.a.	0.06	1.36	3	3.82	2.94	0.17	1.02	99.88	9.36	62.6	15.7	9.92	9.56	13.9	64.3	197	3.63	405	38.8	2.99	0.48	266	6.93	11.5	6.47	0.82	23.1	52.5	5.97	24.6	5.67	1.21	5.4	1.08	6.6	1.35	4.14	0.5	3.86	0.6
271	Biezhentao range	Db-13	Dacite	64.27	0.96	14.72	1.67	4.2	n.a.	0.07	1.63	4.03	3.25	2.61	0.17	0.58	99.8	11.4	75.5	19.4	12.1	6.42	17.4	72.7	169	4.37	385	41.4	7.82	1.28	266	7.02	17.8	8.12	1.13	23	52.5	6.22	25.9	6.15	1.27	5.8	1.08	6.7	1.36	4.22	0.6	3.98	0.61
272	Alatao range	C14BL02	Rhyolite	73.2	0.28	13	n.a.	n.a.	2.05	0.03	0.24	1.14	3.33	4.36	0.04	1.58	99.3	9.1	13.9	11.1	2.46	3.14	18.1	130	68	4.75	537	39.8	7.51	0.51	224	5.93	19	11.4	2.53	27	57	7.17	28.7	5.94	0.61	6.19	1.03	6.36	1.33	4.06	0.61	3.7	0.56
273	Alatao range	C14BL03	Rhyolite	73.2	0.26	12.85	n.a.	n.a.	2	0.03	0.25	1.26	3.63	3.99	0.03	1.61	99.1	9.96	13.6	5.75	2.29	1.21	18.5	122	61	4.33	559	41.7	7.39	0.51	233	6.46	18.1	12.3	2.62	29.6	61	7.68	30.2	6.4	0.64	6.21	1.11	6.79	1.42	4.24	0.62	3.97	0.6
274	Alatao range	C14BL04	Rhyolite	73.1	0.26	12.9	n.a.	n.a.	2.02	0.03	0.24	1.4	3.37	4.26	0.03	1.8	99.4	9.3	13.6	29.7	2.24	5.51	18.4	129	69.4	4.59	569	41	7.31	0.45	231	5.93	17.6	11.3	2.57	28.1	57.1	7.33	28.6	6.19	0.61	5.86	1.08	6.49	1.37	4.03	0.61	3.87	0.58
275	Alatao range	C14BL05	Rhyolite	73.5	0.25	12.8	n.a.	n.a.	1.92	0.03	0.24	1.22	3.68	3.96	0.03	1.6	99.2	8.97	13.6	7.15	2.43	2.63	18	124	59.2	3.88	539	40.4	6.8	0.42	227	5.96	17.6	11.7	2.42	28.3	58.8	7.38	29.7	6.01	0.56	6.14	1.1	6.3	1.31	4.07	0.59	3.75	0.6
276	Alatao range	C14BL06	Rhyolite	73	0.26	12.9	n.a.	n.a.	1.99	0.03	0.24	1.28	3.15	4.37	0.04	1.74	99	9.35	14.1	7.63	2.84	2.21	18.2	141	54.7	4.59	545	40.8	7.13	0.46	229	5.81	17.6	11.8	2.69	27.8	58.7	7.48	29.1	6.2	0.61	6.19	1.1	6.47	1.34	3.99	0.59	3.73	0.57
277	Alatao range	C14BL07	Rhyolite	72.9	0.27	12.9	n.a.	n.a.	2.08	0.03	0.26	1.42	3.59	3.86	0.04	1.87	99.2	9.88	14.2	6.77	2.57	1.81	19.1	137	64.4	3.76	530	43.6	7.23	0.46	239	6.09	16.2	11.7	2.47	30	63.1	7.69	31.2	6.42	0.66	6.62	1.11	6.71	1.45	4.29	0.6	3.9	0.6
278	Alatao range	C14BL08	Rhyolite	72.9	0.27	12.9	n.a.	n.a.	2.07	0.03	0.26	1.34	3.36	4.2	0.04	1.87	99.2	7.41	12.7	7.47	2.11	2.58	16.9	124	50.9	4.26	584	41.1	7.3	0.62	237	7.18	18.4	13	2.5	30.3	63.7	8.29	31.9	6.79	0.67	6.84	1.22	7.36	1.55	4.67	0.69	4.34	0.67
279	Alatao range	C14BL09	Rhyolite	72.9	0.25	12.9	n.a.	n.a.	1.88	0.02	0.22	1.31	3.19	4.4	0.03	1.84	98.9	7.78	13	6.8	2.09	1.42	17.5	135	62.1	4.88	558	39.6	6.92	0.48	223	6.27	17	11.6	2.49	28.6	59.1	7.32	29.6	6.19	0.63	6.09	1.09	6.64	1.39	4.29	0.61	3.73	0.59
280	Alatao range	C14BL10	Rhyolite	73.2	0.26	13	n.a.	n.a.	1.98	0.03	0.24	1.21	3.36	4.2	0.04	1.77	99.3	7.97	12.6	7.55	2.17	1.85	17.5	129	55.2	4.42	533	41.2	7.52	0.5	223	6.18	16.1	12.3	2.78	28.4	58.9	7.56	28.8	6.2	0.61	6.02	1.1	6.66	1.46	4.23	0.62	3.94	0.59
281	Alatao range	C14BL11	Rhyolite	72.7	0.26	12.95	n.a.	n.a.	2.11	0.03	0.26	1.42	3.38	4.25	0.04	1.95	99.4	8.38	13.4	6.79	2.44	1.45	18.3	129	63	4.35	558	41.9	6.61	0.33	234	6.38	17.7	12	2.66	29.5	59.7	7.85	31.2	6.47	0.6	6.57	1.13	7.03	1.39	4.28	0.62	4.08	0.61
282	Alatao range	C14BL12	Rhyolite	73.1	0.27	13	n.a.	n.a.	2.02	0.03	0.26	1.08	3.26	4.53	0.04	1.6	99.2	8.29	13.2	5.63	2.1	0.88	17.6	136	56.6	4.5	584	40.8	7.08	0.47	238	6.34	18.7	11.3	2.39	28.5	58.5	7.47	29.1	6.1	0.6	6.32	1.08	6.59	1.39	4.14	0.59	3.81	0.56
283	Alatao range	C14BL13	Rhyolite	72.7	0.26	12.9	n.a.	n.a.	2.01	0.03	0.26	1.38	3.27	4.22	0.03	2.02	99.1	8.37	13.1	8.32	2.55	1.94	18.3	131	53.8	4.37	538	41.9	7.05	0.46	233	6.02	19.7	12	2.61	28.8	60.4	7.42	29.7	6.26	0.58	6.18	1.13	6.79	1.42	4.18	0.62	3.93	0.59
284	Alatao range	C14BL14	Rhyolite	72.7	0.27	12.9	n.a.	n.a.	2.01	0.03	0.24	1.44	3.53	3.92	0.04	2.04	99.1	8.79	14.8	10.3	2.28	2.76	18.7	127	58.9	4.07	508	42.9	7.3	0.46	256	6.58	16.6	12	2.51	29.1	60.2	7.64	29.2	6.38	0.65	6.36	1.15	6.74	1.43	4.26	0.65	3.97	0.61
285	Alatao range	C14BL15	Rhyolite	73.5	0.26	12.9	n.a.	n.a.	2.1	0.03	0.27	1.09	3.36	4.05	0.03	1.31	98.9	9.61	14.9	13.5	2.51	2.43	18.9	130	82.7	4.69	631	42.4	7.38	0.47	247	6.61	19.2	12.1	2.69	29.2	60.5	7.52	30.1	6.5	0.62	6.24	1.1	6.69	1.4	4.16	0.61	3.9	0.58
286	Alatao range	C14BL28	Rhyolite	73	0.3	13.3	n.a.	n.a.	2.31	0.02	0.3	1.58	3.52	4.17	0.04	0.46	99	10.6	17.6	16.5	2.82	3.46	19.7	123	112	3.18	580	31.8	7.19	0.36	267	6.88	12.9	11.1	1.5	26.1	54.9	6.72	26.9	5.79	0.72	5.2	0.951	5.46	1.05	3.18	0.44	3	0.44
287	Alatao range	C14BL29	Rhyolite	73.1	0.31	13.3	n.a.	n.a.	2.39	0.03	0.33	1.52	3.67	3.95	0.04	0.4	99	10.56	18.3	12.4	2.95	3.39	19.8	116	99.8	4.11	576	39.8	6.66	0.27	265	6.44	17.6	11.1	2.19	26.8	55.7	6.73	27.9	5.88	0.68	5.85	1.04	6.03	1.26	3.74	0.55	3.63	0.51
288	Alatao range	C14BL30	Rhyolite	73.1	0.3	13.2	n.a.	n.a.	2.38	0.02	0.34	1.24	3.43	4.49	0.04	0.52	99.1	8.94	16.5	10.5	2.62	8.79	18	131	101	3.18	618	41.7	7.92	0.52	240	6.57	17	12.8	2.86	28.8	60.6	7.59	31.5	6.89	0.68	6.65	1.22	7.38	1.5	4.36	0.65	4.33	0.6
289	Alatao range	C14BL31	Rhyolite	73.7	0.29	13.35	n.a.	n.a.	2.26	0.03	0.28	1.5	3.66	4.02	0.04	0.33	99.5	8.76	15.4	9.09	2.37	2.81	17.6	111	92	6.24	612	29.1	7.51	0.44	246	6.78	23	12.1	1.76	27.3	59.3	7.33	30	6.16	0.79	5.79	1.03	5.75	1.1	3.21	0.49	3.37	0.51
298	Alatao range	WXT728	Rhyolite	72.8	0.36	12.99	1.95	0.46	n.a.	0.02	0.54	0.32	1.65	6.82	0.06	1.86	99.83	6.69	25.9	31.6	3.26	10.5	17.7	138	63.1	n.a.	470	32	9.07	0.924	187	5.77	11.5	9.62	2.05	24	53.5	6.13	24.8	5.23	0.863	5.05	0.823	5.11	1.16	3.44	0.493	3.44	0.542
299	Alatao range	WXT729	Rhyolite	74.55	0.3	11.62	1.9	0.32	n.a.	0.03	0.43	0.96	2.76	4.95	0.05	1.93	99.8	4.95	18.6	32.7	3.16	9.01	14	106	108	n.a.	578	29.6	8.3	0.783	182	5.47	13	9.02	2.02	23.5	50.7	5.87	24.7	5.18	0.86	5.05	0.785	4.89	1.14	3.29	0.473	3.37	0.545
300	Alatao range	WXT730	Rhyolite	73.8	0.35	12.93	1.88	0.39	n.a.	0.02	0.23	0.48	4.12	4.52	0.04	1.03	99.79	5.8	10.8	24.7	1.77	8.07	19.9	74.5	49.1	n.a.	623	48	9.76	0.909	279	8.66	7.22	5.99	1.74	13.7	32.2	3.76	15.4	3.61	0.766	4.17	0.856	6.64	1.8	5.06	0.799	5.38	0.87
301	Alatao range	WXT731	Dacite	66.09	0.92	14.6	3.85	1.7	n.a.	0.09	1.24	3.34	3.91	3.06	0.15	0.85	99.8	15.3	45.9	30.3	8.51	64.7	19.3	85.2	207	n.a.	461	36.9	11.5	1.01	326	8.51	11.4	8.72	2.38	21.7	48.2	5.76	25.6	6.2	1.42	6.18	0.962	6.26	1.47	4.06	0.563	4.01	0.64
302	Alatao range	WXT-732	Dacite	67.95	0.74	14.15	3.55	1.35	n.a.	0.09	0.87	2.36	4.39	3.2	0.11	1.09	99.85	16.2	26.1	42.9	5.41	18	19.2	91.8	219	n.a.	494	37	10.9	0.917	333	7.4	10.4	7.99	2.24	21.4	48.6	5.59	24.7	5.79	1.25	5.7	0.973	5.81	1.35	3.77	0.536	3.67	0.614
303	Alatao range	WXT-733	Dacite	65.91	0.89	14.56	4.2	1.4	n.a.	0.06	0.91	3.35	3.52	3.84	0.14	1.04	99.82	17.5	50.1	76.6	6.38	34.7	20.4	128	242	n.a.	559	39.6	11.9	0.943	344	7.32	7.43	7.56	2.24	23	50.7	5.98	26.6	6.3	1.59	6.36	1.04	6.3	1.42	3.84	0.567	3.75	0.624
304	Alatao range	XT-31	Andesite	61.98	1.02	15.53	5	1.27	n.a.	0.06	2.56	3.29	3.61	1.97	0.12	3.41	99.82	18.9	113	36.9	14.9	7.3	20	67.4	155	n.a.	359	28.9	9.37	0.694	301	7.95	9.64	7.73	2.25	16.8	37.4	4.93	20.3	4.45	1.31	4.74	0.832	5.25	1.11	3.14	0.501	3.32	0.555
305	Alatao range	WXT-734	Dacite	65.74	0.92	14.45	4.6	1.26	n.a.	0.06	1.12	3.58	3.73	3.19	0.14	1.03	99.82	17.7	50.9	25.9	7.3	6.96	21.7	111	248	n.a.	482	40	12.3	1.01	354	7.51	6.9	8.13	2.16	22.8	51.3	6.22	27.3	6.41	1.58	6.34	1.07	6.41	1.5	4.01	0.613	3.98	0.647
306	Alatao range	WXT751	Dacite	66.05	0.88	14.8	4.2	1.26	n.a.	0.09	1.57	1.69	3.71	3	0.11	2	99.36	16.7	65.7	40.4	8.21	12.4	19.4	91.7	247	n.a.	422	35.7	11.3	0.922	411	9.45	10.4	8.89	2.44	19.7	43.3	4.79	23.2	5.16	1.38	5.03	0.91	5.6	1.27	3.83	0.506	3.67	0.622
307	Alatao range	WXT743	Rhyolite	75.63	0.31	11.35	0.77	1.76	n.a.	0.02	0.21	0.84	2.08	6.17	0.02	0.58	99.74	5.67	30.3	23.7	2.48	8.13	14.3	178	164	n.a.	1157	41.6	7.49	0.865	260	7.29	19.2	14.84	2.71	26.3	56.9	6.25	28.1	6.24	0.946	5.76	1.05	6.64	1.53	4.46	0.616	4.08	0.693
308	Alatao range	WXT746	Rhyolite	77.05	0.29	11.17	0.88	1.7	n.a.	0.01	0.42	0.32	1.71	5.11	0.04	1.07	99.77	5.64	12.9	26.9	2.23	8.92	15.3	149	63.7	n.a.	830	41.9	7.15	0.738	238	6.57	12.5	11.91	2.75	25.3	54.7	6.15	28.5	6.11	0.88	6.01	1.03	6.39	1.45	4.28	0.571	3.99	0.663
309	Alatao range	WXT-736	Adakite	62.73	0.57	16.94	1.53	2.92	n.a.	0.07	3.06	4.89	3.52	1.41	0.09	2.05	99.78	11.3	85	44.5	12.6	33.6	16.4	32.7	453	n.a.	469	12.1	4.68	0.447	110	2.61	7.51	3.71	1.24	9.91	21.2	2.4	9.46	2.06	0.859	2.04	0.346	2	0.43	1.26	0.184	1.24	0.199
310	Alatao range	WXT740	Adakite	62.31	0.56	16.6	1.73	2.88	n.a.	0.06	3.08	5.75	3.59	1.41	0.09	1.72	99.78	14.4	96.1	132	16.1	98.8	18.1	29.8	499	n.a.	510	13.9	4.86	0.452	117	2.83	7.31	4.11	1.18	11.4	24	2.72	11.4	2.46	0.9	2.58	0.394	2.24	0.48	1.41	0.18	1.29	0.227
311	Alatao range	WXT-740⁎	Adakite	n.a.	n.a.	n.a.	n.a.	n.a.	n.a.	n.a.	n.a.	n.a.	n.a.	n.a.	n.a.	n.a.	n.a.	13.5	90.3	137	15.5	95.2	17.8	29.6	500	n.a.	508	13.8	5.03	0.458	119	2.67	7.29	3.87	1.17	11.6	25.1	2.85	11.5	2.49	0.927	2.56	0.39	2.31	0.472	1.36	0.191	1.28	0.223
312	Alatao range	WXT-741	Adakite	62.05	0.57	16.76	1.82	2.76	n.a.	0.08	2.98	6.05	3.44	1.57	0.08	1.64	99.8	10.8	81.4	47.3	13.9	31.2	16	36.3	421	n.a.	395	12.6	4.94	0.463	111	2.51	7	3.11	1.02	10.3	22.2	2.61	10.3	2.34	0.842	2.55	0.364	2.05	0.431	1.26	0.181	1.24	0.203
313	Alatao range	WXT742	Adakite	62.33	0.59	16.73	1.78	2.8	n.a.	0.07	2.85	5.94	3.54	1.5	0.08	1.59	99.8	11.8	87.8	54.2	15	26.5	16.6	37.4	432	n.a.	411	12.8	4.89	0.459	112	2.86	7.64	3.77	1.29	10.5	21.7	2.52	11.1	2.31	0.877	2.16	0.372	2.17	0.45	1.4	0.192	1.32	0.215
314	Alatao range	WXT744	Adakite	74.42	0.31	12.64	0.73	2.04	n.a.	0.03	0.58	0.83	4.67	2.83	0.04	0.66	99.78	5.23	23.5	18.9	3.15	2.84	5.8	63	284	n.a.	854	6.94	4.05	0.416	110	2.66	4.35	3.27	0.847	10.1	18.9	1.84	7.13	1.27	0.658	1.17	0.194	1.14	0.22	0.74	0.097	0.739	0.13
315	Alatao range	XT-28	Adakite	61.9	0.6	16.71	1.7	2.76	n.a.	0.07	2.71	5.8	3.74	1.58	0.1	2.12	99.79	27	99.1	33.7	14.4	20.4	17.1	43.3	493	n.a.	463	12.8	4.74	0.666	130	3.7	7.79	4.01	1.28	11.3	23.3	2.96	11.7	2.49	0.849	2.36	0.406	2.38	0.485	1.34	0.214	1.39	0.24
316	Alatao range	XT-29	Adakite	72.36	0.32	13.6	1.8	1.5	n.a.	0.04	0.35	0.96	4.67	3.07	0.06	1.03	99.76	2.96	18.1	8.36	3.43	4.25	11.3	68.6	486	n.a.	863	6.71	3.64	0.382	124	3.2	5.63	3.88	1.03	11.8	20.7	2.21	7.96	1.38	0.388	1.12	0.186	1.19	0.237	0.71	0.111	0.798	0.142
317	Alatao range	XT-27	Adakite	62.39	0.66	17.37	0.9	4.03	n.a.	0.03	3.32	2.62	4.38	1.32	0.05	2.7	99.77	13.9	113	34.6	14.3	20.2	17.7	36.8	432	n.a.	618	9.94	4.94	0.518	134	3.59	6.85	4.11	1.21	7.89	16.6	2.05	8.08	1.71	0.776	1.83	0.316	1.94	0.394	1.158	0.184	1.27	0.214
318	Alatao range	XT-30	Adakite	63.64	0.5	17.4	1.5	2.24	n.a.	0.06	2.72	4.42	4.11	1.34	0.07	1.78	99.78	11.6	86.3	24.2	12.5	18.6	17.6	38.9	540	n.a.	550	10.2	3.56	0.378	119	3.12	8.96	3.37	1.1	10.1	20.6	2.51	9.89	1.99	0.734	1.97	0.329	1.91	0.375	1.08	0.171	1.1	0.181
319	Alatao range	XT26	Adakite	61.23	0.69	18.25	1.85	2.72	n.a.	0.04	2.67	2.31	4.23	1.78	0.08	3.97	99.82	13.6	85.1	38	12.7	21.3	17.5	56.6	379	n.a.	347	13.1	5.01	0.492	134	3.49	4.97	3.84	0.875	8.44	22.4	2.9	11.8	2.31	0.741	2.24	0.387	2.36	0.474	1.35	0.209	1.37	0.241
320	Awulale range	11QJ1-3	Rhyolite	72.5	0.38	13.2	n.a.	n.a.	2.61	0.04	0.22	0.83	3.1	6.48	0.04	0.61	100.01	n.a.	22.1	23.2	1.61	1.36	15.4	148	55	n.a.	723	33.6	18.9	1.35	489	10.2	5.53	17.5	4.56	37.7	77.5	8.8	30.5	5.22	0.54	4.63	0.85	5.53	1.31	3.99	0.67	4.7	0.81
321	Awulale range	12QJ-9	Rhyolite	71.01	0.39	13.4	n.a.	n.a.	2.69	0.05	0.25	0.39	2.33	8.27	0.04	0.62	99.54	n.a.	17.9	21.8	2.52	1.48	16.1	194	55.8	n.a.	935	30	18.7	1.42	44	10.2	11	18.6	4.42	29.2	62	7.53	29.1	5.68	0.54	4.9	0.85	5.56	1.27	3.9	0.66	4.51	0.72
322	Awulale range	12QJ-10	Rhyolite	72.43	0.37	13.16	n.a.	n.a.	2.5	0.03	0.28	0.76	4.31	5.07	0.04	0.83	99.84	n.a.	30.7	21.2	2.19	1.3	15.5	106	35.2	n.a.	579	37.1	17.9	1.31	399	9.46	5.86	17.4	4.6	26.2	65.1	8.27	30.7	6.44	0.68	5.93	1.06	6.78	1.52	4.58	0.74	4.89	0.74
323	Awulale range	12QJ-12	Rhyolite	71.72	0.42	13.08	n.a.	n.a.	2.87	0.03	0.24	0.76	3.78	5.76	0.05	0.94	99.73	n.a.	20.5	26.6	2.25	1.9	13.8	129	54.9	n.a.	641	38.5	17.5	1.31	413	9.44	10.7	16.7	4.06	26.8	61.8	8.04	31.6	6.41	0.63	6.12	1.03	6.83	1.59	4.68	0.74	4.83	0.75
324	Awulale range	11QJ1-1	Rhyolite	71.58	0.39	13.1	n.a.	n.a.	2.52	0.04	0.3	1.13	2.54	7.05	0.04	0.94	99.63	n.a.	24.6	29.8	1.83	7.92	13.6	163	54	n.a.	956	34	16.3	1.26	458	11.1	9.39	17.8	4.95	21.8	49.2	6.21	23.7	4.83	0.7	4.73	0.86	5.67	1.33	3.93	0.68	4.88	0.81
325	Awulale range	11QJ1-4	Rhyolite	70.94	0.36	12.97	n.a.	n.a.	2.71	0.04	0.23	0.82	3.12	6.19	0.04	0.73	98.15	n.a.	20.8	24.2	1.99	1.9	14.7	139	53.2	n.a.	687	31.3	17.7	1.29	451	9.63	5.9	16.7	4.52	27.9	58.4	7.11	25.8	4.93	0.51	4.23	0.81	5.14	1.21	3.76	0.67	4.71	0.78
326	Awulale range	TS007	Dacite	66.04	0.68	15.08	n.a.	n.a.	5.3	0.09	1.66	1.72	5.08	1.82	0.13	2.19	99.79	n.a.	n.a.	n.a.	n.a.	n.a.	n.a.	45.92	258.7	n.a.	n.a.	n.a.	n.a.	n.a.	n.a.	n.a.	n.a.	n.a.	n.a.	n.a.	n.a.	n.a.	19.81	4.79	n.a.	n.a.	n.a.	n.a.	n.a.	n.a.	n.a.	n.a.	n.a.
327	Awulale range	TS010	Andesite	62.15	0.81	16.34	n.a.	n.a.	6.82	0.13	2.03	2.42	4.18	2.28	0.18	2.44	99.77	n.a.	n.a.	n.a.	n.a.	n.a.	n.a.	52.79	349.5	n.a.	n.a.	n.a.	n.a.	n.a.	n.a.	n.a.	n.a.	n.a.	n.a.	n.a.	n.a.	n.a.	27.46	6.3	n.a.	n.a.	n.a.	n.a.	n.a.	n.a.	n.a.	n.a.	n.a.
328	Awulale range	TS017	Rhyolite	71.32	0.33	13.64	n.a.	n.a.	3.31228	0.09	1.26	0.52	4.39	3.15	0.07	1.42	99.47	n.a.	n.a.	n.a.	n.a.	n.a.	n.a.	191.8	73.84	6.5	970.7	15.79	7.48	0.94	147.3	4.89	n.a.	26.28	3.86	19.18	37.47	4.27	15.15	3.05	0.69	2.87	0.43	2.56	0.53	1.64	0.31	2.11	0.35
329	Awulale range	TS018	Rhyolite	70.7	0.41	13.91	n.a.	n.a.	3.56562	0.09	1.42	0.57	4.36	3.18	0.18	1.63	99.98	n.a.	n.a.	n.a.	n.a.	n.a.	n.a.	161.8	61.63	5.68	501	19.89	6.45	0.66	134.6	4.33	n.a.	13.1	3.79	12.67	27.51	3.35	12.88	2.9	0.56	3.01	0.49	3.19	0.72	2.2	0.38	2.48	0.39
330	Awulale range	TS022	Andesite	61.92	0.76	16.11	n.a.	n.a.	6.29828	0.22	3.22	4.56	2.16	2.61	0.13	2.15	99.84	n.a.	n.a.	n.a.	n.a.	n.a.	n.a.	421.5	78.84	4.54	676.3	35.4	11.39	1.1	255.4	7.06	n.a.	17.23	5.15	30.01	67	8.8	36.27	8.55	1.71	7.7	1.15	6.52	1.35	3.75	0.57	3.73	0.58
331	Awulale range	04XJ-274	Trachy andesite	59.99	1.98	13.67	5.26	n.a.	9.78287	0.3	2.27	3.77	3.77	3.68	0.82	1.8	99.73	n.a.	141	3.67	13.9	1.53	18.6	155	324	1.95	996	52.4	8.85	0.65	267	6.55	14.72	6.9	2.15	27	65.3	9.11	39	9.7	2.78	10.15	1.63	9.72	2.02	5.46	0.8	4.95	0.74
332	Awulale range	04XJ-277	Trachy andesite	57.84	2.13	13.75	4.91	n.a.	10.8007	0.24	2.52	4.86	4.05	2.92	0.99	1.81	99.8	n.a.	177	3.17	17.8	1.56	18.8	125	368	2.05	532	51.6	8.13	0.59	246	6.04	12.97	6.04	1.86	24.4	58.4	8.45	36.7	9.05	2.44	9.47	1.54	8.95	1.85	5.06	0.72	4.62	0.71
367	Awulale range	/	Trachyandesite	57.77	0.65	16.16	n.a.	n.a.	7.69	0.09	4.19	3.44	5.79	2.2	0.17	1.81	99.96	n.a.	116	16.3	15.4	14.5	13.2	83.8	198	n.a.	175	22.6	6.96	1.66	193	4.88	1.75	3.56	0.93	6.53	13.4	1.78	8.63	2.07	0.58	2.7	0.63	3.46	0.83	2.45	0.37	2.58	0.54
370	Awulale range	/	Trachyte	59.97	1.81	15.47	n.a.	n.a.	3.06	0.14	2.44	5.72	3.73	6.78	0.32	0.56	100	n.a.	190	27.2	17	14.1	18.3	266	212	n.a.	1008	49.7	9.93	0.84	530	13.9	89	8.93	2.46	23.1	53.8	7.6	33.6	8.16	1.64	8.16	1.67	8.68	2.06	5.87	0.95	5.72	0.88
371	Awulale range	/	Rhyolite	71.28	0.34	14.48	n.a.	n.a.	2.59	0.06	0.96	1.85	3.81	3.66	0.08	0.88	99.99	n.a.	41.5	3.27	4.86	2.45	11.7	126	239	n.a.	532	20.5	6.52	0.69	177	5.63	15.8	14.6	4.5	19.4	36.7	4.28	16.9	3.18	0.93	3.01	0.57	3.26	0.7	2.46	0.43	2.72	0.46
372	Awulale range	/	Rhyolite	69.42	0.36	15.02	n.a.	n.a.	2.93	0.04	0.91	3	4.17	3.32	0.08	0.73	99.98	n.a.	45.3	3.98	5.45	3.25	11.4	122	292	n.a.	512	21.1	6.46	0.65	144	4.23	9.21	12.9	3.06	18.5	36	4.64	15.7	3.9	1.12	3.48	0.56	3.6	0.77	2.61	0.44	2.98	0.48
377	Awulale range	BZ28	Rhyolite	73.11	0.28	13.41	0.45	n.a.	1.46	0.02	0.49	2.77	2.81	4.15	0.06	1.43	99.99	5.08	23.8	2.4	1.81	2.4	10.3	113	426	n.a.	1433	22.2	7.19	0.79	176	5.81	7.5	18.1	4.68	21.1	40.2	4.61	17.1	3.18	1.32	3.57	0.64	3.55	0.87	2.46	0.41	2.74	0.48
374	Awulale range	/	Trachyandesite	58.21	1.26	17	n.a.	n.a.	6.56	0.07	2.59	5.62	4.89	1.49	0.46	1.82	99.97	n.a.	151	1.37	8.39	5.49	18.6	36	506	n.a.	291	26.8	15.1	0.97	247	6.26	3.12	5.09	1.55	34.3	71.8	9.67	38.1	7.35	1.83	6.15	0.96	5.09	1.11	3.22	0.43	2.79	0.44
396	Awulale range	DD-86	Dacite	70.96	0.33	14.37	n.a.	n.a.	2.34245	0.06	0.56	2.58	4.2	3.23	0.08	0.98	100.89	n.a.	n.a.	n.a.	n.a.	3.09	12.6	103	195	0.81	470	18.1	5.36	0.5	147	4.25	5.78	11.2	4.74	16.4	32.6	3.81	13.9	2.82	0.76	2.91	0.48	2.87	0.61	2.04	0.28	2.18	0.34
397	Awulale range	DD-121	Dacite	67.35	0.38	16.2	n.a.	n.a.	2.89031	0.04	1.41	3.12	4.41	1.89	0.11	2.39	102.47	n.a.	n.a.	n.a.	n.a.	8.22	17	76.8	520	3.51	321	9.1	2.97	0.28	100	2.91	8.17	2.83	0.99	13.8	25.4	2.91	10.6	2.04	0.61	1.79	0.27	1.51	0.29	0.89	0.13	0.77	0.12
398	Awulale range	DD-135	Dacite	70.99	0.35	14.75	n.a.	n.a.	3.07145	0.06	0.51	1.87	3.63	3.87	0.08	0.99	101.44	n.a.	n.a.	n.a.	n.a.	5.18	12.8	128	240	2.65	540	17.1	4.92	0.44	153	4.3	16.7	9.98	3.35	14.4	28.3	3.49	13	2.63	0.69	2.81	0.44	2.78	0.57	1.92	0.28	2.06	0.31
399	Awulale range	DD-136	Dacite	66.64	0.65	15.78	n.a.	n.a.	2.17803	0.06	0.92	4.95	4.54	2.84	0.11	1.89	101.46	n.a.	n.a.	n.a.	n.a.	4.32	14.3	99.4	394	1.38	416	22.8	6.43	0.51	214	5.8	35	10.2	2.72	11.1	27.9	3.58	14.8	3.5	0.64	3.72	0.58	3.66	0.77	2.32	0.36	2.36	0.35
400	Awulale range	DD-147	Dacite	71.4	0.35	14.61	n.a.	n.a.	2.63815	0.07	0.5	1.6	4.06	3.59	0.08	1.13	101	n.a.	n.a.	n.a.	n.a.	2.62	15.4	121	238	1.49	525	18.9	5.54	0.52	206	4.72	53.9	10.8	3.35	15.8	28.4	3.41	12.4	2.56	0.58	2.55	0.44	2.88	0.61	2	0.28	2.18	0.33
418	Awulale range	DD66	rhyolite	69.42	0.36	15.02	1.75	1.18	n.a.	0.04	0.91	3	4.17	3.32	0.08	0.73	99.98	6.39	45.3	3.98	5.45	3.25	n.a.	122	292	n.a.	512	21.1	6.46	0.65	144	4.23	9.21	12.9	3.06	18.5	36	4.64	15.7	3.9	1.12	3.48	0.56	3.6	0.77	2.61	0.44	2.98	0.48
419	Awulale range	DD58	rhyolite	71.28	0.34	14.48	2.2	0.39	n.a.	0.06	0.96	1.85	3.81	3.66	0.08	0.88	99.99	5.8	41.5	3.27	4.86	2.45	n.a.	126	239	n.a.	532	20.5	6.52	0.69	177	5.63	15.8	14.6	4.5	19.4	36.7	4.28	16.9	3.18	0.93	3.01	0.57	3.26	0.7	2.46	0.43	2.72	0.46
423	Awulale range	BZ19	Trachyandesite	54.17	1.11	15.62	3.25	1.84	n.a.	0.14	4.53	11.34	3.24	2.71	0.31	1.36	99.62	21.2	180	73.2	14.6	44.1	n.a.	74.3	466	n.a.	373	27.4	5.85	0.43	128	3.5	4.48	5.85	1.66	17.6	38.4	5.45	21.6	5.4	1.48	5.05	0.91	4.7	1.15	3.47	0.46	2.98	0.51
424	Awulale range	BZ02	Trachyandesite	58.21	1.26	17	3.25	2.95	n.a.	0.07	2.59	5.62	4.89	1.49	0.46	1.82	99.61	13.8	151	1.37	8.39	5.49	n.a.	36	506	n.a.	291	26.8	15.1	0.97	247	6.26	3.12	5.09	1.55	34.3	71.8	9.67	38.1	7.35	1.83	6.15	0.96	5.09	1.11	3.22	0.43	2.79	0.44
454	Awulale range	LZB07	Andesite	55.36	0.91	16.1	0.66	n.a.	8.42	0.15	4.9	6.01	3.79	0.77	0.2	1.86	99.13	26	255	59.7	25.1	25.6	16	25	534	4.3	288	21.4	4.09	0.32	107	3.05	n.a.	4.19	1.53	13	30.3	3.73	17.2	3.78	1.23	3.98	0.63	3.84	0.79	2.22	0.34	2.34	0.34
455	Awulale range	LZB03	Andesite	55.23	0.85	18.92	0.84	n.a.	7.41	0.21	2.5	3.71	5.7	3.06	0.22	1.34	99.99	21.9	126	11.4	31.8	8.7	19	68.1	305	3.09	196	21.5	4.36	0.36	128	3.67	n.a.	5.87	2.2	14.7	30	4.26	19.8	4.46	1.13	4.21	0.68	3.94	0.81	2.22	0.33	2.38	0.36
456	Awulale range	LZB21	Andesite	58.28	0.83	15.21	0.52	n.a.	7.59	0.13	4.23	4.43	3.16	3.49	0.23	1.71	99.81	20.5	201	107	20.9	31.1	13.3	45.7	408	4.54	372	19.9	4.13	0.34	103	3.02	n.a.	4.2	1.59	12.3	31.3	3.87	17.6	3.96	1.1	3.95	0.62	3.63	0.73	2.12	0.33	2.15	0.34
457	Awulale range	LZB25	Andesite	54.73	0.73	20.09	0.99	n.a.	5.94	0.08	2.63	2.77	5.6	4.01	0.47	1.97	100.01	13.4	109	23.7	12.8	12.1	18.8	108	415	4.32	750	20.6	6.38	0.46	136	3.61	n.a.	10.1	3.04	32.1	61	7.84	32.1	5.7	1.52	4.99	0.66	3.96	0.75	2.02	0.3	2.13	0.3
458	Awulale range	LZB26	Andesite	54.47	0.73	20.39	1.2	n.a.	5.09	0.12	2.25	7.51	3.48	3.44	0.47	0.89	100.04	12.9	144	23.6	15.3	15.6	17.9	35.9	462	2.59	285	20.4	6.24	0.45	135	3.56	n.a.	9.9	2.45	22.6	42.3	6.32	27.4	5.4	1.43	4.81	0.7	3.91	0.75	2.1	0.31	2.08	0.33
459	Awulale range	LZB28	Andesite	54.12	0.79	20	1.2	n.a.	5.12	0.08	2.27	7.05	3.69	3.86	0.53	0.73	99.44	13	141	64	15.8	14.1	18.4	26.5	424	3.38	419	22.8	7.34	0.52	156	4.12	n.a.	11.1	2.74	25.3	49	6.92	30	5.9	1.51	5.23	0.77	4.13	0.85	2.23	0.34	2.27	0.37
460	Awulale range	ZBW13–32	Andesite	54.79	0.74	20.08	1.38	n.a.	4.93	0.12	2.08	6.75	3.85	3.81	0.48	0.99	100	11.2	130	20.5	14.1	12.2	17.3	54.1	460	2.87	407	19.5	6.21	0.46	135	3.65	n.a.	9.85	2.17	22.6	42.7	6.3	27.9	5.25	1.42	4.54	0.66	3.89	0.75	2.07	0.3	2.06	0.32
461	Awulale range	LZB01	Dacite	61.88	0.68	16.73	0.95	n.a.	5.52	0.09	1.71	2.53	7.07	1.26	0.19	1.24	99.85	11.4	159	11.8	10.5	5.66	14.3	41.9	268	1.7	81.6	20.2	4.49	0.4	129	3.95	n.a.	6.08	1.91	15	30	4.08	18.2	3.81	1.03	3.58	0.61	3.59	0.72	2.15	0.34	2.35	0.37
462	Awulale range	LZB23	Dacitic crystal tuff	61.29	0.6	16.82	0.45	n.a.	5.34	0.1	2.9	3.05	2.86	4.77	0.2	1.23	99.61	15.2	72.4	30.4	12.8	13.2	15.5	121	338	10.1	384	18.2	5.33	0.42	121	3.47	n.a.	7.74	2.53	18.6	35.8	4.65	20.4	4.04	1.1	3.98	0.59	3.38	0.67	1.89	0.27	1.96	0.3
463	Awulale range	TS197	Trachy andesite	61.24	0.74	16.5	n.a.	n.a.	7.74	0.16	2.39	1.77	4.05	3.95	0.21	1.14	99.67	n.a.	n.a.	n.a.	n.a.	n.a.	n.a.	248.6	148.7	n.a.	337.9	22.87	7.8	0.88	231.8	5.97	n.a.	10.11	3.39	14.05	33.87	4.27	16.73	4.24	1.08	4.09	0.7	4.06	0.79	2.22	0.35	2.45	0.36
464	Awulale range	TS199	Trachy andesite	61.75	0.69	15.19	n.a.	n.a.	6.32	0.21	2.02	1.59	4.83	4.56	0.2	2.25	99.61	n.a.	n.a.	n.a.	n.a.	n.a.	n.a.	n.a.	n.a.	n.a.	n.a.	n.a.	n.a.	n.a.	n.a.	n.a.	n.a.	n.a.	n.a.	n.a.	n.a.	n.a.	n.a.	n.a.	n.a.	n.a.	n.a.	n.a.	n.a.	n.a.	n.a.	n.a.	n.a.
465	Awulale range	TS201	Trachy andesite	54.25	0.96	17.69	n.a.	n.a.	9.82	0.16	4.05	4.01	3.81	2.12	0.27	2.64	99.78	n.a.	n.a.	n.a.	n.a.	n.a.	n.a.	91.44	477	n.a.	711	24.7837	6.04	0.59	180.6	3.58	n.a.	5.03	3.18	16.5	37.05	4.65	19.52	4.8	1.2	4.57	0.77	4.75	0.98	2.66	0.39	2.7	0.425
466	Awulale range	TS202	Trachy andesite	61.22	0.72	16.12	n.a.	n.a.	7.7	0.16	2.09	1.97	4.52	3.78	0.21	1.24	99.73	n.a.	n.a.	n.a.	n.a.	n.a.	n.a.	n.a.	n.a.	n.a.	n.a.	n.a.	n.a.	n.a.	n.a.	n.a.	n.a.	n.a.	n.a.	n.a.	n.a.	n.a.	n.a.	n.a.	n.a.	n.a.	n.a.	n.a.	n.a.	n.a.	n.a.	n.a.	n.a.
467	Awulale range	TS207	Trachy andesite	61.08	0.72	16.19	n.a.	n.a.	6.36	0.2	1.53	1.62	5.28	3.68	0.2	2.95	99.81	n.a.	n.a.	n.a.	n.a.	n.a.	n.a.	177.5	593.2	n.a.	550	22.47	7.62	0.86	225.4	5.59	n.a.	10.16	3.28	20.89	47.24	6.91	26.14	6.15	1.36	5.09	0.81	5.05	1.03	2.63	0.43	2.67	0.43
468	Awulale range	16F-4	Trachy andesite	56.0017	0.838858	16.7624	n.a.	n.a.	9.23558	0.201547	2.89761	4.29448	3.97452	2.30862	0.170528	3.12	99.8059	n.a.	n.a.	n.a.	n.a.	n.a.	n.a.	96.5942	529.947	n.a.	440.983	16.9383	3.73784	0.452055	112.262	2.70552	n.a.	3.43212	2.47408	12.0847	27.0975	3.42777	14.4351	3.40698	0.890773	3.18539	0.56325	3.3618	0.692276	1.99475	0.295675	1.98259	0.303852
469	Awulale range	16F-5	Trachy andesite	57.2992	0.827648	16.7123	n.a.	n.a.	8.81545	0.129347	2.141	3.03946	5.42179	2.56238	0.100547	2.75	99.7992	n.a.	n.a.	n.a.	n.a.	n.a.	n.a.	79.5664	486.623	n.a.	892.174	23.7837	5.46742	0.543672	162.607	3.85782	n.a.	5.29044	3.04237	15.254	32.5125	4.09481	16.4963	4.23881	1.00776	3.91305	0.671051	4.2092	0.862101	2.36386	0.349825	2.40041	0.370465
470	Awulale range	16F-6	Trachy andesite	63.8067	0.614215	14.5806	n.a.	n.a.	6.17146	0.124664	1.51226	1.1594	5.15199	3.70653	0.0973948	2.9	99.8252	n.a.	n.a.	n.a.	n.a.	n.a.	n.a.	89.9203	516.05	n.a.	827.128	22.3273	7.14764	0.792795	209.821	4.90865	n.a.	11.0313	3.44067	21.5987	47.5176	6.35546	25.6413	6.17649	0.998669	3.8551	0.698584	4.39672	0.936563	2.62145	0.395011	2.50504	0.38913
300-260Ma magmatic rocks
Mafic rocks
168	Awulale range	QY-10	Diabase	47.61	1.56	16.11	7.1	n.a.	11.76	0.26	7.74	6.22	3.42	1.61	0.45	3.13	96.74	32.8	305	119	45.5	95.3	18.8	28.6	422	14.6	391	32.3	5.8	0.44	203	4.58	6.86	0.83	0.45	15.3	35.8	4.96	22.5	5.35	1.8	5.26	1.04	5.83	1.27	3.41	0.55	3.35	0.53
169	Awulale range	QY-11	Diabase	47.66	1.58	16.02	7.35	n.a.	11.9	0.25	7.72	6.64	3.15	1.71	0.44	2.83	97.07	35.6	346	85.6	35.9	59.9	19.3	51.6	398	1.29	848	36.9	7.21	0.47	289	6.67	659	1.21	0.76	17.7	41.5	5.63	24.9	5.9	1.96	6.24	1.18	6.63	1.41	4.01	0.66	4.19	0.63
170	Awulale range	QY-12	Diabase	47.42	1.59	16.25	6.95	n.a.	11.62	0.32	7.78	6.16	3.35	1.66	0.45	3.28	96.6	33.5	355	128	46.9	100	18.8	21.4	476	4.47	294	34.4	6.02	0.45	248	5.63	6.75	0.87	0.5	15.8	37	5.16	24.5	5.95	1.88	5.79	1.08	6.45	1.35	3.8	0.59	3.96	0.59
171	Awulale range	IV-1	Diabase	48.47	1.64	16.51	4.76	n.a.	10.1	0.12	7.26	7.89	4.51	0.49	0.33	3.34	97.32	27.4	238	115	41.5	91	20.1	12.1	425	3.98	230	26.3	5.19	0.39	123	3.16	9.05	0.76	0.26	14.8	32.5	4.67	20.1	4.95	1.75	5.71	0.9	5.15	1.08	3.23	0.42	2.85	0.41
172	Awulale range	IV-2	Diabase	46.39	1.33	17.24	4.81	n.a.	10.34	0.16	7.51	8.55	3.32	1.43	0.35	2.97	96.62	26.4	268	107	32.6	63.1	21.1	84.8	390	1.89	460	33.5	5.14	0.41	144	3.78	126	0.91	0.37	9.99	24.7	4.01	19	5.55	1.66	6.44	1.07	6.5	1.37	4.11	0.57	3.62	0.55
173	Awulale range	IV-3	Diabase	46.97	1.69	15.91	4.01	n.a.	10.18	0.1	6.37	10.78	4	0.28	0.39	3.3	96.67	26.2	236	111	43.7	92.2	22.7	32.5	294	2.12	214	29.2	6.31	0.47	124	3.35	102	0.98	0.34	19.1	41.5	5.68	24.1	5.74	1.75	6.27	0.97	5.69	1.15	3.43	0.49	3.03	0.45
174	Awulale range	IV-4	Diabase	46.79	1.59	16.24	4.51	n.a.	9.63	0.14	7.09	11.19	2.92	1.14	0.36	3.07	97.09	30.4	251	115	39	92	21.3	14.6	410	3.56	218	27.1	5.23	0.38	129	3.27	6.55	0.79	0.27	15.5	33.6	4.86	21.3	5.19	1.72	6.03	0.96	5.24	1.1	3.26	0.44	2.84	0.43
175	Awulale range	IV-5	Diabase	46.86	1.71	16.05	4.56	n.a.	10.25	0.16	6.56	10.77	3.39	0.94	0.42	2.6	97.11	31	280	119	46.5	95.3	23	43.1	225	3.19	162	27.3	4.76	0.32	104	2.71	22.1	0.64	0.52	15.3	33.8	4.95	22.1	5.41	1.82	6.27	0.99	5.63	1.15	3.31	0.45	2.69	0.41
176	Awulale range	IV-6	Diabase	47.2	1.37	16.95	4.53	n.a.	8.66	0.09	7.72	7.99	4.23	0.56	0.05	4.25	94.82	28.4	219	113	37.9	83.6	23 J	53.6	424	1.89	320	40.7	8.33	0.59	176	4.06	191	3.29	0.55	31.1	70.3	10.1	43.8	9.88	1.92	10.2	1.5	8.22	1.65	4.71	0.62	3.81	0.53
177	Awulale range	IV-7	Diabase	46.83	1.59	16.31	3.5	n.a.	8.99	0.09	6.71	11.49	3.68	0.15	0.33	3.68	96.17	29.4	171	117	36	84.8	21.7	58.5	385	3.21	331	27.8	4.95	0.37	121	3.44	66.8	0.73	0.43	8.64	20.2	3.22	15.7	4.45	1.37	5.47	0.89	5.43	1.15	3.35	0.47	3.18	0.44
178	Awulale range	IV-8	Diabase	46.69	1.66	15.98	3.31	n.a.	8.91	0.08	6.37	11.85	3.8	0.06	0.36	3.74	95.76	30.1	254	119	41	93.7	22.1	47.2	429	2.57	275	30.1	5.73	0.41	122	3.42	23	0.83	0.39	19.8	43	5.99	26.3	5.98	1.87	6.61	1.06	5.83	1.25	3.62	0.47	3.12	0.46
179	Awulale range	KT-6	Diabase	46.73	1.46	16.33	8.95	n.a.	12.3	0.2	7.06	9.33	2.72	0.94	0.46	2.29	97.53	32.8	305	119	45.5	95.3	18.8	28.6	422	14.6	391	32.3	5.8	0.44	203	4.58	6.86	0.83	0.45	15.3	35.8	4.96	22.5	5.35	1.8	5.26	1.04	5.83	1.27	3.41	0.55	3.35	0.53
180	Awulale range	KT-7	Diabase	48.37	1.5	15.6	6.9	n.a.	12.67	1.03	5.88	5.28	4.56	1.55	0.5	2.62	96.94	35.6	346	85.6	35.9	59.9	19.3	51.6	398	1.29	848	36.9	7.21	0.47	289	6.67	659	1.21	0.76	17.7	41.5	5.63	24.9	5.9	1.96	6.24	1.18	6.63	1.41	4.01	0.66	4.19	0.63
181	Awulale range	KT-9	Diabase	47.31	1.54	16.31	8.7	n.a.	12.23	0.19	7.08	9.3	2.74	0.73	0.48	1.93	97.91	33.5	355	128	46.9	100	18.8	21.4	476	4.47	294	34.4	6.02	0.45	248	5.63	6.75	0.87	0.5	15.8	37	5.16	24.5	5.95	1.88	5.79	1.08	6.45	1.35	3.8	0.59	3.96	0.59
182	Awulale range	V-1	Diabase	47.28	1.55	16.55	8.33	n.a.	12.22	0.2	7.09	9.19	2.97	0.65	0.41	0.64	98.11	27.4	238	115	41.5	91	20.1	12.1	425	3.98	230	26.3	5.19	0.39	123	3.16	9.05	0.76	0.26	14.8	32.5	4.67	20.1	4.95	1.75	5.71	0.9	5.15	1.08	3.23	0.42	2.85	0.41
183	Awulale range	V-2	Diabase	48.99	1.6	15.9	5.05	n.a.	11.72	0.39	6.27	6.97	4.06	1.68	0.08	2.11	97.66	26.4	268	107	32.6	63.1	21.1	84.8	390	1.89	460	33.5	5.14	0.41	144	3.78	126	0.91	0.37	9.99	24.7	4.01	19	5.55	1.66	6.44	1.07	6.5	1.37	4.11	0.57	3.62	0.55
184	Awulale range	V-3	Diabase	47.8	1.54	16.04	5.16	n.a.	10.86	0.39	6.41	7.93	4.37	0.71	0.52	2.95	96.57	26.2	236	111	43.7	92.2	22.7	32.5	294	2.12	214	29.2	6.31	0.47	124	3.35	102	0.98	0.34	19.1	41.5	5.68	24.1	5.74	1.75	6.27	0.97	5.69	1.15	3.43	0.49	3.03	0.45
185	Awulale range	V-4	Diabase	48.64	1.58	16.85	8.19	n.a.	11.8	0.18	7	9.15	2.99	0.72	0.44	0.49	99.35	30.4	251	115	39	92	21.3	14.6	410	3.56	218	27.1	5.23	0.38	129	3.27	6.55	0.79	0.27	15.5	33.6	4.86	21.3	5.19	1.72	6.03	0.96	5.24	1.1	3.26	0.44	2.84	0.43
186	Awulale range	V-5	Diabase	45.98	1.74	15.83	5.96	n.a.	12.44	0.34	6.93	8.45	3.64	0.88	0.64	3.19	96.87	31	280	119	46.5	95.3	23	43.1	225	3.19	162	27.3	4.76	0.32	104	2.71	22.1	0.64	0.52	15.3	33.8	4.95	22.1	5.41	1.82	6.27	0.99	5.63	1.15	3.31	0.45	2.69	0.41
187	Awulale range	V-6	Diabase	48.72	1.58	16.1	4.87	n.a.	11.17	0.41	7.14	6.29	4.54	1.01	0.7	2.98	97.66	28.4	219	113	37.9	83.6	23.1	53.6	424	1.89	320	40.7	8.33	0.59	176	4.06	191	3.29	0.55	31.1	70.3	10.1	43.8	9.88	1.92	10.2	1.5	8.22	1.65	4.71	0.62	3.81	0.53
188	Awulale range	V-7	Diabase	49.29	1.64	16.44	4.51	n.a.	10.05	0.36	6.64	8.22	3.94	1.14	0.09	2.61	97.81	29.4	171	117	36	84.8	21.7	58.5	385	3.21	331	27.8	4.95	0.37	121	3.44	66.8	0.73	0.43	8.64	20.2	3.22	15.7	4.45	1.37	5.47	0.89	5.43	1.15	3.35	0.47	3.18	0.44
189	Awulale range	V-8	Diabase	48.16	1.6	16.26	5.77	n.a.	11.7	0.25	7.04	6.33	4.36	1.08	0.45	2.77	97.23	30.1	254	119	41	93.7	22.1	47.2	429	2.57	275	30.1	5.73	0.41	122	3.42	23	0.83	0.39	19.8	43	5.99	26.3	5.98	1.87	6.61	1.06	5.83	1.25	3.62	0.47	3.12	0.46
222	Awulale range	KK1-10	Olivine basalt	51.29	1.48	15.69	n.a.	7.66	n.a.	0.24	0.99	6.53	3.52	6.96	0.81	4.69	99.86	n.a.	236	98	13.3	17	14.6	203	191	n.a.	2701	27.9	15	0.72	247	5.82	61.79	2.41	1.1	37.8	83.9	12.2	49.8	9.44	2.57	7.64	1.08	5.65	1.08	2.78	0.4	2.48	0.38
223	Awulale range	KK7-1	Olivine basalt	55.58	0.83	16.93	n.a.	7.16	n.a.	0.25	3.84	2.91	4.08	5.44	0.28	2.43	99.74	n.a.	166	88	28	61.5	17.6	218	848	n.a.	1366	18.9	7.58	0.49	183	4.43	9.04	5.89	1.7	24.1	47.6	6.31	24.5	4.63	1.3	4.09	0.64	3.81	0.77	2.11	0.29	1.86	0.28
224	Awulale range	KK1-9	Olivine basalt	48.91	1.31	15.24	n.a.	9.84	n.a.	0.12	1.71	7.4	4.67	4.05	0.7	6.03	99.99	n.a.	152	127	27.8	58.7	18.5	153	365	n.a.	1098	23.7	11.5	0.65	223	5.33	7.36	2.72	1.14	34.34	73.5	10.2	42.3	7.93	2.17	6.9	0.98	5.24	1.01	2.68	0.37	2.37	0.37
225	Awulale range	QB-1A	Olivine basalt	49.19	1.41	16.46	n.a.	9.1	n.a.	0.5	6.35	3.91	2.51	5.26	0.72	4.14	99.85	n.a.	210	140	29.9	60	19.8	251	784	n.a.	1635	24.7	12.7	0.6	224	5.1	21	2.56	0.71	38.9	79.7	9.82	39.4	7.42	2.12	6.74	0.95	4.85	0.94	2.76	0.35	2.25	0.34
226	Awulale range	QB-1B	Olivine basalt	50	1.38	17.04	n.a.	9.63	n.a.	0.48	4.66	4.43	3.95	4.09	0.72	3.38	100.1	n.a.	233	140	26.8	61	18.1	125	642	n.a.	1505	23.9	12.2	0.7	220	5.1	24	2.55	0.88	37.8	78.6	9.56	38.5	7.12	2.01	6.73	0.93	4.89	0.93	2.82	0.35	2.32	0.34
227	Awulale range	QB-1C	Olivine basalt	51.31	1.4	16.89	n.a.	9.37	n.a.	0.45	3.97	3.82	3.91	4.85	0.72	2.96	99.98	n.a.	234	140	28.6	60	17.3	159	687	n.a.	1860	24.2	13	0.6	221	5	31	2.57	0.81	39.3	80.9	9.93	39.4	7.26	2.02	6.74	0.93	4.9	0.91	2.59	0.34	2.21	0.33
228	Awulale range	QB-1D	Olivine basalt	51.81	1.35	16.33	n.a.	9.38	n.a.	0.43	4.6	3.56	4.11	4.51	0.69	3.01	100.1	n.a.	218	140	25.6	61	17.2	137.5	456	n.a.	1560	23.6	12.3	0.6	223	5.1	22	2.5	0.93	38.8	79.1	9.52	37.9	7.1	1.92	6.53	0.93	4.8	0.93	2.66	0.34	2.27	0.32
229	Awulale range	QB-1E	Olivine basalt	48.82	1.39	16.01	n.a.	10.05	n.a.	0.52	7.71	2.64	3.65	3.42	0.68	4.92	99.96	n.a.	209	140	37.2	65	20.7	131	256	n.a.	891	23.5	12	0.7	215	5	13	2.34	0.64	36	75.7	9.35	37.1	7.05	1.97	6.57	0.91	4.83	0.93	2.61	0.35	2.26	0.31
230	Awulale range	QB-2A	Olivine basalt	50.45	1.4	16.55	n.a.	8.93	n.a.	0.47	5.82	3.32	3.22	4.7	0.71	3.98	99.85	n.a.	216	140	29.7	60	19	239	691	n.a.	1760	24.5	12.7	0.6	226	5.1	14	2.58	0.73	36.7	80.8	9.81	39	7.58	2.07	7.15	0.97	4.99	0.94	2.74	0.36	2.38	0.34
231	Awulale range	QB-2B	Olivine basalt	48.63	1.43	15.36	n.a.	11.29	n.a.	0.41	6.6	3.1	3.74	3.73	0.69	4.71	99.83	n.a.	188	150	44.7	68	21.2	109	192	n.a.	916	24.5	12.5	0.7	222	5.1	12	2.45	0.65	33.7	77.2	9.71	38.5	7.75	2.03	6.94	1	4.88	0.97	2.74	0.34	2.26	0.34
232	Awulale range	QB-2C	Olivine basalt	50.33	1.44	17.02	n.a.	8.97	n.a.	0.39	5.26	3.88	2.75	5.36	0.73	3.58	100.1	n.a.	202	140	29.1	62	18.6	267	684	n.a.	2080	24.8	12.6	0.7	227	5.1	19	2.57	0.73	38.3	82.1	10	40	7.69	2.13	6.89	0.98	4.97	0.94	2.76	0.35	2.2	0.32
233	Awulale range	TB-1A	Andesite	50.07	0.96	17.74	n.a.	10.91	n.a.	0.94	4.13	2.48	3.55	5.16	0.52	3.14	99.89	n.a.	153	20	36.2	11	21.5	154	97.6	n.a.	2280	31.6	10.3	0.6	217	6	265	7.41	1.87	20.3	46.9	6.25	26.7	6.25	1.23	6.18	0.96	5.56	1.11	3.3	0.44	3.21	0.47
234	Awulale range	TB-1B	Andesite	51.22	1	17.62	n.a.	10.51	n.a.	0.91	3.95	1.88	3.68	5.6	0.52	2.84	99.97	n.a.	146	20	35.8	12	20.4	161	87	n.a.	1920	31.1	10.7	0.6	226	6.2	228	7.65	2.02	20.5	47.7	6.47	27.4	6.36	1.16	6.22	0.98	5.51	1.08	3.28	0.46	3.05	0.46
235	Awulale range	TB-1C	Andesite	50.44	1.24	17.32	n.a.	9.98	n.a.	0.94	4.15	2.12	2.46	6.95	0.64	2.96	99.81	n.a.	194	18	31.8	11	20.6	204	166	n.a.	4840	36	11.6	0.7	261	7.1	421	8.54	2.38	24.6	59.8	8.4	37.6	8.45	1.64	7.97	1.26	7.21	1.39	4.12	0.62	3.85	0.57
236	Awulale range	04XJ-327	Basalt	48.56	1.51	15.82	2.07	9.4	n.a.	0.38	6.33	5.47	3.17	2.65	0.32	3.98	99.66	33.1	254	150	39.9	89.6	16.4	110	1533	n.a.	565	23.4	3.67	0.24	120	2.83	n.a.	0.99	0.35	10.6	25.9	3.72	16.5	4.05	1.42	4.31	0.73	4.3	0.87	2.39	0.33	2.14	0.33
237	Awulale range	04XJ-329	Basalt	47.39	1.65	13.96	0.12	11.82	n.a.	0.18	2.21	8.48	6.29	0.23	0.41	7.09	99.83	35.7	75.6	98.5	31.5	28.3	13.5	4.6	468	n.a.	70.3	25	5.71	0.34	157	3.32	n.a.	1.64	0.37	12.9	34.7	4.73	20.5	4.66	1.59	4.82	0.75	4.46	0.92	2.48	0.36	2.27	0.33
238	Awulale range	04XJ-334	Basalt	49.09	1.12	15.81	5.15	3.66	n.a.	0.35	8.56	6.7	2.84	1.7	0.13	4.66	99.77	37.9	235	256	42.6	151	14	76.8	492	n.a.	514	21.2	1.37	0.1	80.7	2.1	n.a.	1.6	0.48	4.82	12.8	2.06	9.79	2.88	1.09	3.42	0.61	3.64	0.8	2.15	0.31	1.95	0.31
239	Awulale range	04XJ-337	Basalt	55.78	1.26	14.14	0.6	9.51	n.a.	0.15	3.4	7.03	3.84	1.41	0.61	2.03	99.76	22.5	158	60.1	26.6	35.1	18.4	25.6	871	n.a.	373	25.4	10.4	0.61	207	4.61	n.a.	4.53	1.26	28.6	64.3	8.34	32.4	6.07	1.7	5.46	0.81	4.6	0.93	2.61	0.36	2.33	0.37
240	Awulale range	04XJ-340	Basalt	52.63	1.23	13.72	0.5	9.33	n.a.	0.1	1.08	7.7	6.8	0.04	0.66	6.07	99.86	25.1	75.5	53.8	13.5	29.5	9.57	0.52	322	n.a.	33.7	26.5	9.01	0.47	207	4.15	n.a.	2.5	0.6	24.5	57.9	7.75	31	6.19	1.71	5.67	0.82	4.58	0.89	2.43	0.33	2.07	0.31
241	Awulale range	04XJ-288	Basalt	51.89	1.75	15.24	7.3	3.94	n.a.	0.17	4.4	8.96	2.9	0.46	0.25	2.46	99.72	22.1	245	122	33.1	71.3	18.4	23.3	1020	n.a.	321	20.4	2.97	0.17	95.1	2.56	n.a.	1.53	0.36	15.6	38.2	5.37	22.6	4.83	1.61	4.38	0.66	3.72	0.75	1.97	0.27	1.65	0.26
242	Awulale range	04XJ-292	Basalt	51.16	1.54	15.15	3.5	7.14	n.a.	0.21	3.35	8.56	3.21	3.09	0.64	2.06	99.61	22.7	236	40.5	30	37.6	18.9	75.8	1698	n.a.	1029	26.5	5.28	0.25	178	4.26	n.a.	4.01	0.93	41.4	97.6	13.72	56.7	10.4	2.84	7.67	0.97	4.97	0.95	2.57	0.34	2.21	0.33
243	Awulale range	04XJ-293	Basalt	51.47	1.56	15.35	3.1	7.59	n.a.	0.16	3.56	7.74	3.19	3.32	0.66	1.86	99.56	22.3	222	53.6	28.4	37.8	20.4	80.9	1970	n.a.	1222	27.3	5.44	0.28	187	4.66	n.a.	4.24	0.94	42.7	104	14.45	57.9	10	2.75	7.63	0.94	4.94	0.94	2.59	0.35	2.25	0.34
244	Awulale range	04XJ-294	Basalt	52.63	1.59	15.18	2.6	8.01	n.a.	0.14	3.44	7.31	2.85	3.94	0.66	1.23	99.58	23.6	231	52.8	28.1	38	19	102	1729	n.a.	1386	26.5	5.51	0.29	187	4.67	n.a.	4.41	0.96	42.9	103	14.58	59.5	10.6	2.83	7.75	0.98	4.99	0.96	2.57	0.35	2.18	0.34
245	Awulale range	04XJ-297	Basalt	52.1	1.58	15.26	2.8	8.28	n.a.	0.14	3.36	7.63	3.42	3.19	0.66	1.19	99.61	23.4	239	54.3	29.8	40.1	19.3	68.3	1699	n.a.	1070	26.3	5.36	0.29	185	4.56	n.a.	4.24	0.94	44	105	14.76	60.3	10.7	2.91	7.96	0.98	4.97	0.95	2.64	0.36	2.24	0.34
246	Awulale range	04XJ-299	Basalt	51.36	1.56	15.21	2.8	7.97	n.a.	0.19	3.52	7.55	3.41	3.06	0.66	2.33	99.62	22.5	218	49.6	30.1	39.9	19.3	53.4	1563	n.a.	861	26.7	5.48	0.29	184	4.7	n.a.	4.42	1.03	42.7	104	14.57	59.3	10.4	2.87	7.41	0.95	4.84	0.94	2.54	0.34	2.22	0.34
247	Awulale range	04XJ-302	Basalt	50.1	1.69	14.21	3.3	5.97	n.a.	0.28	2.24	10.7	4.33	1.7	0.25	4.71	99.48	22.2	268	131	33.5	67	16.3	75.7	854	n.a.	504	20.3	2.95	0.17	93.9	2.53	n.a.	1.54	0.51	15.8	37.8	5.55	24.1	5.15	1.75	4.89	0.71	3.82	0.77	2.02	0.27	1.65	0.25
248	Awulale range	04XJ-303	Basalt	52.15	1.77	14.91	7.05	4.31	n.a.	0.18	4.77	8.83	2.89	0.46	0.25	2.14	99.71	23.2	267	126	35	73.1	18.6	20.1	1000	n.a.	330	20.3	3	0.17	95.3	2.53	n.a.	1.52	0.37	15.4	37.6	5.47	23.3	5.12	1.74	4.88	0.72	3.83	0.78	2.02	0.28	1.66	0.26
249	Awulale range	04XJ-305	Basalt	51.87	1.76	15.13	7.15	4.22	n.a.	0.18	4.82	8.95	2.86	0.44	0.24	2.11	99.73	21.4	231	122	33.5	70	18.5	17.6	1024	n.a.	312	20.7	2.94	0.17	94.6	2.49	n.a.	1.43	0.35	14.6	35	5	21.1	4.55	1.56	4.37	0.66	3.68	0.73	1.97	0.26	1.67	0.25
250	Awulale range	04XJ-307	Basalt	51.93	1.72	15.13	6.6	4.56	n.a.	0.18	4.81	9.05	2.85	0.41	0.27	2.23	99.74	22.4	253	138	34.7	74.9	18	17.8	1070	n.a.	342	20.5	2.98	0.16	94.9	2.48	n.a.	1.54	0.36	15.8	38.5	5.44	23.5	4.93	1.66	4.68	0.68	3.74	0.74	1.93	0.26	1.64	0.25
251	Awulale range	04XJ-310	Basalt	51.73	1.74	15.04	7.3	4	n.a.	0.18	4.97	8.81	2.82	0.47	0.26	2.42	99.74	22.8	263	130	35.1	76.2	18.6	19.7	1009	n.a.	350	20.3	2.95	0.17	94.3	2.52	n.a.	1.54	0.37	16	38.7	5.57	23.4	4.98	1.68	4.55	0.67	3.72	0.74	1.94	0.27	1.64	0.24
252	Awulale range	04XJ-315	Basalt	52.23	1.35	15.59	3.35	5.25	n.a.	0.14	5.46	8.77	3.14	1.1	0.43	2.95	99.76	20.2	163	261	35.1	179	17.3	13.1	627	n.a.	367	21.1	8.91	0.41	202	4.57	n.a.	3.14	0.66	24.8	54.3	6.9	26.7	5.12	1.46	4.49	0.69	3.76	0.74	2.04	0.28	1.74	0.27
253	Awulale range	04XJ-317	Basalt	52.03	1.37	15.82	3.55	5.16	n.a.	0.14	5.77	8.46	3.21	1.03	0.44	2.8	99.78	22.3	182	279	38.8	193	18.6	10.2	656	n.a.	369	21.4	8.9	0.43	210	4.62	n.a.	3.27	0.68	25	56.5	7.3	28.7	5.61	1.66	5.06	0.76	4.15	0.82	2.19	0.29	1.85	0.27
254	Awulale range	04XJ-320	Basalt	52.29	1.32	15.6	3.7	4.74	n.a.	0.13	6.27	8.23	3.09	1.13	0.43	2.82	99.75	20.3	166	267	36.4	187	17.9	14.5	661	n.a.	369	21.2	8.46	0.43	205	4.62	n.a.	3.09	0.65	24.4	54.3	7.1	27.2	5.22	1.58	4.69	0.72	3.96	0.79	2.15	0.29	1.81	0.28
255	Awulale range	04XJ-326	Basalt	52.18	1.36	15.93	3.2	5.4	n.a.	0.14	5.82	8.3	3.18	1.27	0.46	2.52	99.76	21.5	175	279	37.4	192	18.5	22.2	646	n.a.	384	21.8	8.78	0.44	212	4.81	n.a.	3.27	0.7	25	56.2	7.28	28.3	5.57	1.63	5.14	0.75	4.29	0.84	2.21	0.29	1.86	0.28
256	Awulale range	WT09-1	Basalt	50.89	1.31	16.22	n.a.	n.a.	10.38	0.42	5.7	5.03	4.42	1.92	0.56	3.09	99.92	27.73	221.9	96.69	n.a.	42.38	18.08	70.66	451.7	n.a.	492.6	25.32	9.4	0.56	211.6	4.78	n.a.	2.63	0.81	29.8	65.12	8.51	34.04	6.55	1.73	5.94	0.88	5.02	0.99	2.78	0.4	2.52	0.4
257	Awulale range	WT09-2	Basalt	50.91	1.29	15.95	n.a.	n.a.	10.3	0.39	5.62	5.43	4.66	1.7	0.56	3.11	99.92	27.23	217.5	91.1	n.a.	38.8	19.2	62.85	351.8	n.a.	496.8	25.01	9.24	0.54	209.2	4.63	n.a.	2.57	0.78	27.71	63.25	8.31	34	6.52	1.78	5.89	0.88	4.92	0.99	2.7	0.4	2.47	0.38
258	Awulale range	WT09-3	Basalt	49.73	1.4	16.92	n.a.	n.a.	12.22	0.66	5.01	2.83	5.43	1.47	0.6	3.66	99.94	28.32	225.9	104.3	n.a.	43.13	28.4	53.85	252.1	n.a.	507.9	26.43	10	0.59	225.7	5.05	n.a.	2.77	0.92	27.88	65.56	8.65	35.01	6.92	1.72	6.18	0.92	5.25	1.05	2.86	0.42	2.62	0.4
259	Awulale range	WT09-5	Basalt	52.48	1.35	15.65	n.a.	n.a.	9.97	0.16	4.88	5.92	5.44	0.9	0.6	2.57	99.9	27.93	228.1	68.2	n.a.	26.22	18.65	30.22	311.3	n.a.	297.9	28.32	10.13	0.6	231.9	5.17	n.a.	3.25	1.03	30.58	69.31	9.04	37.26	7.47	2.11	6.74	0.97	5.51	1.1	3	0.44	2.78	0.43
260	Awulale range	WT09-6	Basalt	50.95	1.25	16.53	n.a.	n.a.	9.99	0.16	5.65	9.05	2.6	1.26	0.22	2.21	99.88	29.3	201.3	110.5	n.a.	86.4	17.53	40	292.6	n.a.	271.4	28.9	4.58	0.34	198.2	4.54	n.a.	2.75	0.85	14.51	33.35	4.76	21.04	4.98	1.7	5.05	0.88	5.53	1.19	3.27	0.5	3.17	0.49
261	Awulale range	WT09-7	Basalt	53.16	1.25	15.64	n.a.	n.a.	10.87	0.18	4.49	4.62	5.9	0.89	0.54	2.34	99.88	25.53	209.3	54.85	n.a.	31.79	18.4	28.35	232.7	n.a.	183.1	25.27	9.15	0.55	204.7	4.52	n.a.	2.93	1	31.9	68.31	8.77	34.38	6.41	1.78	5.84	0.88	4.94	0.99	2.74	0.39	2.52	0.37
262	Awulale range	WT010-1	Basalt	48.09	1.24	17.59	n.a.	n.a.	10.21	0.32	6.63	8.4	2.67	1.59	0.21	2.96	99.91	34.32	253.9	164.1	n.a.	71.56	17.32	86.44	394.4	n.a.	388.8	23.42	2.44	0.19	96.71	2.47	n.a.	0.7	0.24	6.94	17.75	2.7	12.94	3.52	1.24	3.66	0.68	4.31	0.91	2.44	0.38	2.31	0.36
263	Awulale range	WT010-2	Basalt	47.79	1.27	17.99	n.a.	n.a.	10.34	0.5	6.89	6.03	3	2.43	0.22	3.48	99.93	34.3	249.2	169.6	n.a.	70.06	17.11	197.1	462.1	n.a.	599.5	23.87	2.51	0.19	98.82	2.51	n.a.	0.7	0.27	5.51	14.24	2.26	11.38	3.36	1.25	3.6	0.68	4.38	0.92	2.55	0.39	2.42	0.37
264	Awulale range	WT010-3	Basalt	48.84	1.62	14.6	n.a.	n.a.	10.29	0.51	4.68	6.6	3.39	1.49	0.64	7.72	100.38	26.14	219.6	70.99	n.a.	18.66	17.67	72.51	96.5	n.a.	184.7	28.18	9.44	0.58	220.4	5.15	n.a.	3.7	0.99	32.45	71.23	9.45	38.52	7.26	1.99	6.6	0.99	5.54	1.13	3.06	0.43	2.82	0.42
265	Awulale range	WT010-6	Basalt	67.42	0.44	15.77	n.a.	n.a.	3.75	0.11	1.02	2.84	3.91	3.37	0.18	1.08	99.88	10.34	42.48	28.37	n.a.	2.25	15.24	103.4	302.6	n.a.	513.9	19.14	5.35	0.45	128.1	3.47	n.a.	6.35	1.18	24.72	49.61	5.98	22.66	4.08	1.17	3.81	0.57	3.3	0.71	2.08	0.33	2.25	0.38
266	Awulale range	WT010-7	Basalt	67.92	0.43	15.55	n.a.	n.a.	3.86	0.09	1.06	1.58	4.67	3.45	0.18	1.09	99.88	9.97	45.59	36.9	n.a.	2.59	14.54	108.4	147.5	n.a.	498.6	20.05	5.22	0.42	127.9	3.48	n.a.	4.74	1.21	17.64	37.15	4.78	19.03	3.85	1.01	3.56	0.56	3.41	0.74	2.14	0.34	2.33	0.37
267	Awulale range	WT011-1	Basalt	54.93	1.06	14.43	n.a.	n.a.	10.74	0.54	4.74	3.63	2.93	3.75	0.37	2.79	99.91	30.77	244	74.77	n.a.	22	14.51	188.2	234.9	n.a.	500.8	31.82	6.16	0.44	176	4.84	n.a.	8.47	2.47	12.17	30.21	4.31	19.26	4.82	1.02	4.83	0.85	5.43	1.17	3.35	0.51	3.28	0.5
268	Awulale range	WT011-2	Basalt	57.67	1.16	14.58	n.a.	n.a.	9.87	0.3	2.81	5.34	2.69	3.63	0.48	1.33	99.86	29.55	203.9	48.06	n.a.	13.64	16.68	188.7	289.4	n.a.	428.8	39.12	8.06	0.57	229.9	6.28	n.a.	11	3.3	20.79	49.02	6.65	28.94	6.78	1.55	6.58	1.13	7.07	1.48	4.15	0.65	4.07	0.61
269	Awulale range	WT011-3	Basalt	50.74	1.18	15.83	n.a.	n.a.	10.99	0.63	5.34	4.79	3.25	3.57	0.42	3.15	99.91	32.97	268.1	81.26	n.a.	25.22	16.34	191.4	310.4	n.a.	499.8	35.3	6.94	0.49	200.3	5.41	n.a.	9.66	3.08	15.57	37.79	5.27	23.6	5.77	1.25	5.67	0.98	6.23	1.32	3.7	0.59	3.68	0.56
270	Awulale range	ZK03	Basalt	54.91	1.06	15.28	n.a.	n.a.	9.79	0.48	3.44	5.32	2.51	3.93	0.37	2.85	99.95	32.54	267.2	86.08	n.a.	21.6	16.18	186	285.1	n.a.	506.8	29.94	6.26	0.45	177.4	4.82	n.a.	8.45	2.66	16.21	36.77	5.01	21.73	5.1	1.24	5.01	0.86	5.25	1.12	3.09	0.48	3.01	0.47
271	Awulale range	WT012-1	Basalt	47.45	1.98	18.15	n.a.	n.a.	12.17	1.32	5.97	2.75	5.2	0.32	0.31	4.32	99.94	36.02	234.5	315.7	n.a.	211.7	25.28	13.7	337.7	n.a.	143.6	36.48	4.32	0.33	149.1	3.49	n.a.	0.47	0.34	6.96	20.67	3.48	17.22	5.05	1.33	5.19	1	6.39	1.35	3.62	0.52	3.22	0.49
272	Awulale range	WT012-2-1	Basalt	54.14	1.2	16.63	n.a.	n.a.	9.81	0.7	2.45	3.08	3.57	4.93	0.5	2.9	99.9	30.07	214.8	51.42	n.a.	12.65	19.53	232.8	294.7	n.a.	1177	42.73	8.28	0.6	242.4	6.47	n.a.	11.51	3.36	18.72	44.21	5.91	25.41	6.11	1.24	6.12	1.1	6.99	1.52	4.22	0.67	4.13	0.62
273	Awulale range	WT012-2-2	Basalt	56.47	2.04	14.66	n.a.	n.a.	8.89	0.35	3.04	5.89	2.54	3.27	0.92	1.82	99.89	27.71	99.53	24.52	n.a.	5.09	17.45	85.68	365.8	n.a.	1831	41.72	6.55	0.52	207.5	5.21	n.a.	5.91	1.8	21.6	52.62	7.67	35.25	8.27	4.91	8.31	1.36	8.17	1.72	4.65	0.67	4.21	0.64
274	Awulale range	WT04-21	Basalt	51.04	1.53	15.83	n.a.	n.a.	10.5	0.23	4.3	7.4	3.14	3.59	0.65	1.63	99.85	21.64	213.4	68.33	n.a.	34.4	20.86	75.06	2131	n.a.	1173	27.19	5.34	0.31	181.8	4.65	n.a.	4.22	0.93	41.59	101.5	14.48	61.81	10.86	3.02	8.42	1.13	5.65	1.05	2.86	0.42	2.69	0.39
275	Awulale range	WT03-1	Basalt	47.72	1.48	15.56	n.a.	n.a.	9.71	0.21	3.97	9.3	2.97	3.21	0.53	5.47	100.12	23.14	227.5	116.2	n.a.	66.32	20.43	116.5	1157	n.a.	1153	23.73	5.86	0.33	149.4	3.77	n.a.	3.29	0.76	30.92	73.21	9.93	41.94	7.85	2.35	6.56	0.91	4.75	0.91	2.5	0.37	2.28	0.34
276	Awulale range	WT03-2	Basalt	51.58	1.5	15.2	n.a.	n.a.	10.49	0.12	4.23	6.89	3.2	3.91	0.6	2.18	99.9	22.56	230.1	127	n.a.	58.77	20.89	170.6	1627	n.a.	937	23.61	5.6	0.31	151.4	3.87	n.a.	3.41	0.79	33.71	80.18	11.03	46.49	8.62	2.48	7.09	0.93	4.62	0.85	2.29	0.34	2.06	0.31
277	Awulale range	WT03-3	Basalt	51.71	1.56	15.85	n.a.	n.a.	10.41	0.23	4.05	7.77	3.36	3.1	0.66	1.15	99.84	23.06	227	78.84	n.a.	38.96	20.72	81.14	1915	n.a.	1037	29.52	5.32	0.31	183.2	4.66	n.a.	4.18	0.94	40.09	97.81	13.61	58.26	10.57	3	8.33	1.13	5.78	1.09	3	0.45	2.79	0.42
278	Awulale range	WT03-4	Basalt	49.87	1.51	15.63	n.a.	n.a.	10.21	0.22	3.99	8.23	3.49	3.11	0.63	3.02	99.92	21.99	222.7	77.63	n.a.	33.88	19.52	58.96	1992	n.a.	1077	27.46	5.21	0.3	180.2	4.6	n.a.	3.96	1.01	39.88	97.21	13.53	57.42	10.36	2.87	8.07	1.1	5.44	1.02	2.81	0.42	2.56	0.38
279	Awulale range	WT03-5	Basalt	51.36	1.55	15.76	n.a.	n.a.	10.62	0.19	4.17	7.61	3.6	2.94	0.65	1.38	99.83	22.52	222.6	75.56	n.a.	35.99	20.7	63.49	1979	n.a.	977	27.96	5.35	0.3	186.5	4.77	n.a.	4.14	0.93	41.09	99.83	13.9	59.07	10.66	2.93	8.45	1.13	5.6	1.04	2.82	0.43	2.59	0.4
280	Awulale range	WT03-6	Basalt	51.56	1.55	15.95	n.a.	n.a.	10.75	0.18	3.88	8.05	3.45	2.81	0.64	1.02	99.84	21.69	219.1	62.97	n.a.	35.8	20.12	61.55	1904	n.a.	1010	27.41	5.18	0.29	177.4	4.49	n.a.	3.95	0.89	40.44	99.24	13.71	58.48	10.58	2.95	8.35	1.11	5.49	1.03	2.81	0.42	2.56	0.4
281	Awulale range	WT03-7	Basalt	51.79	1.55	15.72	n.a.	n.a.	10.58	0.15	4.11	7.18	3.45	3.39	0.64	1.3	99.85	22.17	219.9	67.76	n.a.	37.09	19.9	89.53	1892	n.a.	1115	28.07	5.27	0.3	178.7	4.59	n.a.	3.99	0.93	40.66	98.68	13.75	58.3	10.49	2.95	8.44	1.13	5.6	1.06	2.9	0.44	2.64	0.39
282	Awulale range	WT04-2	Basalt	62.91	0.77	16.87	n.a.	n.a.	5.45	0.02	1.94	5.25	4.24	1.41	0.33	0.69	99.87	17.54	28.52	28.86	n.a.	2.62	17.84	50.35	472	n.a.	286	31.71	3.71	0.27	99.79	2.94	n.a.	2.13	0.84	12.97	31.2	4.4	20.06	4.95	1.55	5.08	0.89	5.75	1.25	3.56	0.53	3.39	0.54
283	Awulale range	WT04-5	Basalt	51.11	1.57	15.81	n.a.	n.a.	10.7	0.14	3.91	6.99	3.35	3.73	0.65	1.88	99.85	22.15	225.9	69.99	n.a.	37.25	20.27	85.79	2330	n.a.	1166	27.64	5.4	0.3	184.2	4.68	n.a.	4.17	0.97	41.8	101.2	14.5	61.81	10.92	3.01	8.6	1.13	5.69	1.08	2.91	0.42	2.69	0.4
284	Awulale range	WT04-7	Basalt	51.18	1.53	15.66	n.a.	n.a.	10.35	0.14	3.92	7.95	3.22	3.48	0.65	1.78	99.84	21.94	223.5	71.2	n.a.	36.84	21.26	79.55	1974	n.a.	1099	26.58	5.46	0.31	184.1	4.7	n.a.	4.19	1.08	40.9	99.66	14.24	61.09	10.7	2.95	8.44	1.11	5.47	1.04	2.8	0.4	2.59	0.39
295	Awulale range	TRD13	Basalt	49.11	1.56	17.71	5.9	4.81	n.a.	0.27	5.73	7.18	3.35	1.41	0.52	2.45	100	31.9	n.a.	86.9	44.1	63.4	21.3	37.8	605	n.a.	425	29.3	8.42	0.5	165	3.45	8.98	2.92	0.8	20.7	45.1	6.11	26.2	5.9	1.88	5.91	0.99	6.15	1.21	3.39	0.5	3.36	0.51
296	Awulale range	TRD14	Basalt	51.82	1.49	16.38	4.31	5.85	n.a.	0.18	4.97	8.24	2.94	1.53	0.82	1.38	99.97	30	n.a.	62.1	34.6	34.4	20.9	31.3	708	n.a.	466	31	14.9	0.81	257	4.83	11.9	3.26	1.02	38.3	81.4	10.1	40.5	7.79	2.3	7.2	1.13	6.61	1.26	3.48	0.52	3.53	0.53
297	Awulale range	TRD15	Basalt	49.33	1.7	16.5	3.22	8.98	n.a.	0.24	4.91	6.15	4.37	1.49	0.51	2.53	99.92	33.9	n.a.	72.2	47	52.8	21	52.6	436	n.a.	499	31.2	9.1	0.53	174	4.02	13	1.23	0.54	20.5	45	6.13	26.7	6.16	1.96	6.38	1.09	6.63	1.3	3.54	0.52	3.38	0.49
298	Awulale range	TRD16	Basalt	49.75	1.7	16.63	3.6	8.34	n.a.	0.18	5.05	5.53	4.15	1.96	0.52	2.53	99.94	34.4	n.a.	79.9	47.5	52.7	21	70.2	507	n.a.	457	30.5	9.33	0.53	180	3.82	15.2	1.43	0.57	19.1	42.1	5.73	25.4	5.83	1.88	6.15	1.05	6.35	1.27	3.46	0.53	3.39	0.5
299	Awulale range	06XJ-66-1	Basaltic andesite	50.252	1.086	19.438	8.74066	n.a.	9.71349	0.183	4.606	6.312	5.547	0.48	0.124	2.36399	100.106	31	284.8	17.05	25.3	9.962	21.27	9.799	395.6	1.458	140.1	18.33	5.037	0.312	104.7	2.633	5.528	1.945	0.574	7.436	18.37	2.639	11.19	2.887	1.008	3.106	0.543	3.293	0.696	1.95	0.294	1.943	0.303
300	Awulale range	06XJ-66-2	Basaltic andesite	49.722	1.129	18.973	9.4362	n.a.	10.4865	0.174	4.11	6.634	5.371	0.491	0.15	2.97466	100.216	32.39	231	18.49	28.14	10.74	18.62	10.31	503.4	1.219	139.6	18.7	4.953	0.326	106	2.592	6.851	1.934	0.52	6.6	17.4	2.6	11.67	2.996	1.087	3.183	0.562	3.429	0.738	2.006	0.314	2.106	0.324
301	Awulale range	06XJ-66-3	Basaltic andesite	50.748	1.039	19.212	9.06369	n.a.	10.0725	0.178	3.63	6.855	5.135	0.804	0.12	2.06083	99.8548	27.28	247.5	23.63	25.07	14.62	18.7	16.93	448.5	2.129	206.1	17.88	4.697	0.284	98.97	2.417	5.572	1.693	0.533	8.069	17.97	2.446	10.73	2.742	0.99	3.065	0.516	3.16	0.664	1.864	0.271	1.845	0.286
302	Awulale range	06XJ-82	Basaltic andesite	n.a.	n.a.	n.a.	n.a.	n.a.	n.a.	n.a.	n.a.	n.a.	n.a.	n.a.	n.a.	n.a.	n.a.	9.161	16.45	9.407	5.78	1.849	12.19	2.261	31.95	0.261	10.08	26.85	8.832	0.605	318.5	8.022	1.641	14.48	3.62	13.99	27.42	3.283	12.6	2.984	0.667	3.144	0.661	4.472	1.031	3.059	0.502	3.542	0.586
303	Awulale range	06XJ-83	Basaltic andesite	57.447	0.635	19.396	4.46121	n.a.	4.95774	0.519	3.918	0.544	9.817	0.033	0.03	2.55109	99.8481	13.3	10.82	10.55	15.97	2.49	10.02	0.915	43.51	0.108	19.46	38.75	11.83	0.862	408.6	11.11	2.376	19.76	10.48	1.692	8.777	1.762	9.217	3.538	0.341	4.103	0.837	5.798	1.367	3.999	0.621	4.205	0.685
304	Awulale range	06XJ84	Basaltic andesite	49.348	1.004	19.906	8.30335	n.a.	9.22752	0.207	4.384	8.099	3.748	0.443	0.121	2.94452	99.4325	25.48	257.1	25.29	25.21	11.97	20.35	6.2	671.4	1.602	200.7	17.43	4.68	0.302	99.47	2.498	4.978	1.672	0.565	7.121	17.52	2.418	10.47	2.736	1.048	2.86	0.489	3.057	0.646	1.865	0.267	1.869	0.284
305	Awulale range	06XJ85	Basaltic andesite	53.344	0.881	17.702	6.79619	n.a.	7.55261	0.14	4.736	5.043	4.982	1.035	0.134	4.30237	99.8524	19.15	193.3	46.65	21.15	15.84	18.04	28.14	1008.3	2.528	433.8	18.33	6.666	0.448	134.4	3.331	10.84	3.517	1.042	12.31	26.6	3.36	13.65	3.051	0.938	3.11	0.523	3.174	0.689	1.973	0.298	1.999	0.32
306	Awulale range	06XJ-86	Basaltic andesite	71.103	0.49793	12.7603	4.28226	n.a.	4.75887	0.1313	0.77871	0.2222	4.08141	4.81871	0.04141	0.90619	100.1	12.11	16.04	8.616	3.852	2.437	13.79	157	53.79	0.694	802	29.31	8.72	0.678	320.4	8.945	4.631	15.8	4.025	12.17	30.16	3.614	14.6	4.117	0.648	4.44	0.794	5.217	1.186	3.565	0.584	3.953	0.629
307	Awulale range	06XJ-87	Basaltic andesite	48.09	1.5	16.16	10.4917	n.a.	11.6594	0.18	7.17	5.94	4.67	1.57	0.13	3.08	100.16	31.31	220.6	170.9	40.37	117.8	16.08	49.26	469.3	2.074	350	18.95	4.999	0.297	154.8	3.351	8.414	0.835	0.356	8.255	20.94	2.987	13.61	3.219	1.203	3.319	0.561	3.326	0.714	2.015	0.299	2.097	0.329
308	Awulale range	06XJ-88-2	Basaltic andesite	51.43	1.52	15.52	9.40291	n.a.	10.4495	0.14	4.76	6.76	6.91	0.05	0.08	2.35	99.97	33.17	222.6	170.3	34.85	117.8	13.74	1.829	142.9	0.183	14.3	18.9	4.548	0.256	149.6	3.232	3.541	0.714	0.258	7.909	20.15	2.881	12.74	3.037	1.072	3.166	0.539	3.35	0.736	2.071	0.321	2.07	0.336
309	Awulale range	06XJ-97	Basaltic andesite	54.884	0.797	16.513	8.49411	n.a.	9.43951	0.143	4.344	7.075	3.472	0.93	0.141	1.95917	99.6982	28.13	190.2	48.69	26.14	22.82	17.12	29.75	419.1	4.764	246.6	22.71	5.062	0.355	166.6	4.243	22.65	8.463	2.564	12.49	28.89	3.926	16.22	3.787	0.91	3.682	0.642	3.764	0.815	2.365	0.366	2.41	0.381
310	Awulale range	06XJ107-1	Basaltic andesite	52.5745	1.01303	20.298	7.13406	n.a.	7.92809	0.10807	2.8381	7.61237	3.96122	0.69892	0.17877	2.87497	100.086	18.41	166.3	20.05	17.84	8.635	20.88	36.29	551.5	7.919	394	24.29	8.866	0.607	184.9	4.619	9.876	4.99	0.92	17.18	38.3	4.825	19.34	4.212	1.279	4.169	0.721	4.395	0.923	2.667	0.401	2.636	0.419
311	Awulale range	06XJ107-2	Basaltic andesite	52.7634	1.07767	19.8657	7.55847	n.a.	8.39973	0.13736	3.26129	6.6357	4.16019	0.79689	0.12928	2.84058	100.068	18.14	174.9	27.82	20.49	10.45	22.06	41.9	470.2	8.037	156.2	18.71	8.195	0.54	173.1	4.321	9.691	4.189	0.81	12.79	28.01	3.423	13.61	3.015	1.19	3.091	0.505	3.149	0.685	1.951	0.281	1.868	0.291
312	Awulale range	06XJ107-3	Basaltic andesite	57.274	1.011	19.312	5.53557	n.a.	6.15168	0.101	2.213	6.62	3.93	1.59	0.133	2.03886	100.375	23.62	149.4	31.19	15.35	10.97	19.81	34.68	405.6	1.387	465.6	18.46	7.704	0.572	172.3	4.527	10.17	4.783	1.141	12.58	27.76	3.576	14.66	3.275	1.334	3.365	0.576	3.561	0.75	2.187	0.319	2.228	0.347
313	Awulale range	06XJ108	Basaltic andesite	58.1073	0.84436	18.382	6.04442	n.a.	6.71716	0.11918	2.49167	6.02061	3.69862	1.64024	0.16766	2.16727	100.356	18.69	122.9	41.15	14.91	9.644	19.93	40.61	381.3	1.358	458.2	19.06	7.265	0.522	172.3	4.208	13.87	4.866	1.266	15.18	31.55	3.921	15.6	3.363	1.207	3.271	0.553	3.497	0.743	2.029	0.311	2.029	0.324
314	Awulale range	06XJ109	Basaltic andesite	57.6962	0.81406	18.4678	6.05169	n.a.	6.72524	0.10605	2.13312	7.07808	3.68246	1.51096	0.16665	1.75264	100.134	17.43	118.1	36.79	13.54	9.25	19.31	38.35	404.7	1.069	440.3	18.87	7.41	0.522	169.4	4.249	13.05	4.817	1.348	15.44	32.79	4.136	16.27	3.444	1.188	3.462	0.562	3.51	0.738	2.127	0.326	2.113	0.34
315	Awulale range	06XJ111	Basaltic andesite	57.934	0.806	18.47	5.89459	n.a.	6.55066	0.129	2.419	6.816	3.338	1.689	0.151	2.06538	100.368	18.33	123.5	41.12	14.79	10.29	19.42	41.77	407.5	1.229	530.1	18.96	7.508	0.535	171.8	4.18	12.79	4.783	1.338	14.78	31.84	3.844	15.32	3.316	1.138	3.365	0.542	3.365	0.723	2.079	0.305	2.107	0.348
316	Awulale range	06XJ112-1	Basaltic andesite	50.556	0.967	22.144	6.71701	n.a.	7.46461	0.114	2.778	7.593	4.314	0.767	0.138	2.56768	99.4037	15.11	139.9	35.36	20.63	11.32	22.77	12.36	640.9	1.198	367.6	15.92	9.776	0.656	196.5	4.551	9.129	5.316	1.398	14.93	32.59	3.788	14.56	2.86	1.307	2.6	0.453	2.681	0.58	1.704	0.262	1.873	0.301
317	Awulale range	06XJ112-2	Basaltic andesite	54.844	0.96556	20.1121	6.29979	n.a.	7.00095	0.14241	1.96546	5.10858	6.12464	0.86052	0.11615	2.99444	100.235	19.42	178.8	13.75	17.16	7.18	19.47	21.61	565	3.501	253	16.63	6.058	0.417	123.2	3.019	9.166	3.014	1.364	9.712	21.28	2.751	11.13	2.649	0.988	2.664	0.441	2.93	0.609	1.78	0.277	1.747	0.287
318	Awulale range	06XJ112-3	Basaltic andesite	55.649	0.938	16.748	7.09312	n.a.	7.88259	0.159	3.142	6.886	3.006	1.515	0.149	3.85831	99.9333	22.51	163	56.63	21.38	18.61	18.36	32.66	356.5	1.202	734.8	20.35	8.423	0.6	157.4	3.904	12.67	5.595	1.416	15.51	32.98	4.178	16.52	3.531	1.145	3.589	0.586	3.53	0.778	2.123	0.312	2.143	0.33
319	Awulale range	06XJ113-1	Basaltic andesite	54.658	1.05	15.487	7.83456	n.a.	8.70654	0.14	4.883	5.39	4.313	0.951	0.168	4.11314	99.8601	26.54	181.2	172.9	26.83	38.92	16.81	20.73	380.9	1.173	489.7	19.89	6.191	0.438	144.6	3.811	6.852	4.389	1.071	13.79	31.15	3.995	16.61	3.676	1.109	3.839	0.599	3.622	0.767	2.107	0.31	1.995	0.315
320	Awulale range	06XJ113-2	Basaltic andesite	53.255	1.091	18.974	8.20348	n.a.	9.11652	0.119	2.416	3.496	5.518	1.501	0.169	3.85208	99.5081	21.8	187.4	14.8	21.22	6.278	19.58	42.13	287.4	1.791	234.2	21.7	9.231	0.604	175.8	4.287	9.848	4.656	1.277	13.33	30.85	3.984	16	3.548	1.216	3.634	0.631	3.644	0.802	2.23	0.338	2.231	0.357
321	Awulale range	06XJ114-1	Basaltic andesite	55.394	0.755	17.092	5.96117	n.a.	6.62465	0.127	1.829	5.54	2.009	1.625	0.143	9.05104	100.19	20.32	158.2	55.38	22.98	33.21	17.22	46.81	107.5	1.724	125	17.76	9.196	0.671	152.7	3.618	9.424	5.248	1.871	14.19	30.29	3.792	14.62	3.104	0.756	2.966	0.491	3.082	0.673	1.907	0.291	1.887	0.306
322	Awulale range	06XJ114-2	Basaltic andesite	54.166	0.917	15.067	7.71578	n.a.	8.57455	0.124	5.561	8.688	3.759	0.674	0.097	2.81043	100.438	27.09	180.3	165.3	25.8	33.17	16.41	13.28	683.9	0.632	332.5	16.62	5.468	0.403	132.7	3.286	9.219	3.913	0.928	10.97	23.58	3.114	12.57	2.944	1.002	2.898	0.484	2.956	0.659	1.813	0.275	1.831	0.292
323	Awulale range	06XJ-91	Basaltic	50.3818	1.35643	17.9154	8.6872	n.a.	9.65409	0.12423	4.22887	5.33381	4.18241	2.00788	0.45147	4.31263	99.9495	21.91	181.1	94.72	24.63	48.94	18.42	51.7	670.1	7.589	925	23.54	14.39	0.747	275.8	5.557	16.42	2.231	0.649	33.29	71.48	9.051	34.76	6.489	1.847	5.302	0.782	4.43	0.852	2.311	0.314	2.111	0.324
324	Awulale range	06XJ-92	Basaltic	47.8275	1.71296	16.9862	10.6357	n.a.	11.8194	0.17776	3.90163	6.99728	4.0501	2.55328	0.89587	3.15004	100.073	25.38	221.9	149.7	31.95	52.46	20	54.86	836.7	12.55	1554.8	25.5	15.67	0.788	283	5.713	9.355	1.588	0.78	43.14	93.77	12.22	47.77	8.709	2.238	6.731	0.911	5.001	0.911	2.47	0.336	2.102	0.331
Intermediate-acid rocks
1	Boluokenu range	wl-12	Quartz diorite	68.97	0.56	14.51	1.94	1.67	n.a.	0.08	1.57	2.46	3.26	3.35	0.12	1.52	100.01	10.2	60.6	29.7	10.4	22.8	17.6	129	176	5.48	466	27.2	8.58	0.76	184	5.57	19.3	13.1	2.39	28.6	59.9	7.07	27.5	5.61	1.14	5.7	0.88	4.98	0.97	2.78	0.44	2.64	0.43
2	Boluokenu range	wl-13	Quartz diorite	68.24	0.59	14.65	2.95	1.03	n.a.	0.06	1.54	2.53	2.71	3.46	0.12	1.48	99.36	11.1	62.8	30.9	7.29	24.1	17.9	132	186	7.14	502	27.2	8.75	0.79	209	6.08	14	13	2.43	29.4	61.9	7.32	29.4	5.87	1.18	5.85	0.88	4.97	0.99	2.82	0.44	2.59	0.43
3	Boluokenu range	wl-14	Quartz diorite	68.41	0.56	14.39	1.46	2.33	n.a.	0.06	1.75	2.41	3.15	3.43	0.12	2	100.07	10.8	61.8	26.6	10.5	20.5	17	142	194	9.28	506	26	8.04	0.74	166	5.17	16.3	12.7	2.42	28.9	60.6	7.18	27.7	5.56	1.11	5.57	0.85	4.97	0.98	2.78	0.42	2.56	0.42
4	Boluokenu range	wl-15	Quartz diorite	70.35	0.55	14.24	2.47	1.03	n.a.	0.05	1.31	2.47	2.56	3.78	0.12	1.26	100.19	9.75	56.6	30.1	8.34	21.8	17.9	127	210	7.02	526	25.9	8.53	0.78	194	5.85	20.8	13.8	2.58	29.4	63.2	7.45	29	5.78	1.17	5.77	0.89	4.98	0.98	2.74	0.42	2.55	0.43
5	Awulale range	TTDB-1	Albite porphyry	74.52	0.19	12.57	0.25	0.05	n.a.	0.01	0.17	1.67	2.72	6.23	0.02	1.58	99.98	6.4	6.1	6.09	0.91	16.8	11.8	128	18.4	0.62	471	17.7	8.71	0.92	135	4.4	1.38	20.8	2.69	4.74	10.3	1.27	5.18	1.66	0.29	2.37	0.42	2.76	0.66	2.15	0.36	2.4	0.4
6	Awulale range	TTDB-2	Albite porphyry	74.97	0.2	12.59	0.09	0.61	n.a.	0.01	0.2	1.19	2.72	6.06	0.02	1.33	99.99	5.54	9.16	4.13	1.74	15.8	12.3	116	31.4	0.92	2049	14.6	8.41	0.88	144	4.58	0.82	15.8	2.27	9.7	25	2.22	8.45	1.92	0.34	1.89	0.37	2.23	0.55	1.85	0.29	2.29	0.38
7	Awulale range	TTDB-3	Albite porphyry	76.81	0.19	12.1	0.07	0.46	n.a.	0.01	0.18	0.89	2.89	5.41	0.02	1.02	100.05	5.58	6.94	7.12	0.82	16.5	12.5	106	11.5	0.59	339	13.8	8.29	0.89	140	4.62	0.6	13.4	2.4	6.88	16.5	1.72	6.33	1.67	0.27	1.81	0.34	2.2	0.52	1.75	0.29	2.13	0.35
8	Awulale range	TTDB-4	Albite porphyry	76.35	0.17	12.42	0.2	0.43	n.a.	0.01	0.25	0.7	3.35	5.09	0.03	0.92	99.92	6.29	5.76	4.07	1.52	15	13.3	108	11.8	0.67	266	14.2	7.56	0.83	126	4.15	2.37	8.01	2.78	20.3	19	4.29	15.2	2.72	0.43	2.32	0.41	2.28	0.53	1.92	0.31	2.14	0.35
9	Awulale range	TTDB-5	Albite porphyry	76.84	0.16	12.2	0.09	0.26	n.a.	0.01	0.15	0.63	3.34	5.44	0.02	0.67	99.81	4.91	4.47	3.13	0.72	13.9	10.3	99.2	14.1	0.46	332	14.3	8.55	0.79	130	4.23	1.83	13.4	3.11	5.24	15.1	1.4	5.52	1.75	0.32	2.23	0.36	2.36	0.55	1.73	0.27	1.93	0.34
10	Biezhentao range	06XJ-08	Granite	75.559	0.083	12.798	1.04287	n.a.	n.a.	0.01	0.046	0.031	2.465	7.634	0.005	0.622456	100.404	0.121	9.094	4.198	0.424	1.406	20.81	316.3	35.05	20	110.2	40.82	25.16	2.294	91.63	4.08	9.521	15.39	3.719	8.167	22.45	3.234	13.64	4.859	0.145	5.256	1.114	6.756	1.385	3.743	0.575	3.666	0.517
11	Biezhentao range	06XJ-010	Granite	75.671	0.12108	12.0384	1.02229	n.a.	n.a.	0.01	0.054486	0.033297	1.38637	8.08411	0.005045	0.878156	99.41	0.045	15.55	8.431	0.768	2.633	19.77	356.5	29.25	18.44	209.2	29.55	20.62	1.816	100.6	4.051	6.154	13.03	2.918	6.633	17.3	2.396	10.46	3.352	0.154	3.481	0.71	4.439	0.923	2.64	0.428	2.733	0.409
12	Biezhentao range	06XJ-12	Granite	76.917	0.092	12.905	0.852111	n.a.	n.a.	0.01	0.01	0.281	2.995	5.265	0.005	0.787837	100.208	2.189	3.945	15.61	0.518	3.06	21.83	264.9	22.76	15.33	143.9	57.26	24.8	2.178	139.8	5.806	10.07	20.2	3.383	19.1	46.74	6.195	23.64	6.65	0.268	7.842	1.606	10.06	2.105	5.941	0.919	5.801	0.887
13	Biezhentao range	06XJ-13	Granite	76.3566	0.11264	12.7242	1.15543	n.a.	n.a.	0.01	0.01	0.33792	3.55533	5.13843	0.007168	0.867426	100.398	0.042	7.983	2.513	0.625	2.088	22.82	264.2	27.14	14.5	149.5	52.74	25.6	2.036	128.3	5.293	9.799	15.27	2.375	15.88	37.44	4.901	18.47	5.117	0.211	6.08	1.376	8.703	1.783	5.055	0.729	4.775	0.687
14	Biezhentao range	06XJ-14	Granite	75.3753	0.09898	12.6402	1.05057	n.a.	n.a.	0.01	0.05656	0.41511	4.06424	4.92274	0.01313	0.785602	99.5434	0.849	19.64	7.251	0.452	1.827	25.2	285.7	18.63	17.24	106.9	58.66	27.46	2.282	142	5.834	14.35	18.71	2.5	18.82	43.9	6.044	23.07	6.417	0.225	7.374	1.592	9.621	2.069	5.759	0.873	5.469	0.788
15	Biezhentao range	06XJ-15	Granite	77.613	0.095	12.965	0.876405	n.a.	n.a.	0.01	0.01	0.305	3.266	5.211	0.003	0.306423	100.139	0.137	7.364	12.24	0.652	7.614	23.17	286.9	17.87	18.64	108.7	51.54	24.17	2.098	120.9	5.287	12.52	12.5	7.436	13.3	31.68	4.221	15.86	4.638	0.199	5.973	1.393	8.744	1.858	5.278	0.787	4.866	0.72
16	Biezhentao range	DBT-11	Granite porphyry	74.25	0.09	13.03	0.23	0.12	n.a.	0.01	0.1	1.54	3.77	5.45	0.02	0.66	99.58	43.3	0.78	4.55	0.61	6.28	28.4	264	4	18.1	192	63.2	23	2.22	137	5.35	15.7	20.7	3.18	23	53.8	6.13	26.8	7.33	0.33	7.81	1.44	9.63	1.9	5.76	0.82	5.49	0.82
17	Biezhentao range	DBT-12	Granite porphyry	75.54	0.09	12.9	0.29	0.27	n.a.	0.01	0.08	0.63	3.84	5.42	0.01	0.74	99.95	34	0.43	4.12	0.48	5.56	26.8	279	2.63	19.5	117	66.8	26.5	2.21	144	5.54	13.6	21.2	2.73	25.8	59.4	6.67	29.2	7.99	0.3	8.31	1.59	10.4	2.08	6.07	0.86	5.87	0.83
18	Biezhentao range	DBT-13	Granite porphyry	75.48	0.11	12.48	0.43	0.26	n.a.	0.02	0.07	0.68	3.62	5.56	0.01	0.6	99.63	37.1	2.17	8.71	1.46	8.38	26.1	289	3.51	21	161	55.1	23.1	1.89	148	5.35	18.3	19.8	5.71	35	79.2	8.78	37.3	9.27	0.4	8.52	1.47	9.1	1.8	5.16	0.75	4.86	0.67
19	Biezhentao range	DBT-18	Granite porphyry	73.97	0.13	13.13	0.7	0.6	n.a.	0.02	0.13	0.76	1.99	6.28	0.02	1.38	99.33	28.5	2.68	5.22	0.84	5.19	28.8	395	4.93	31.1	206	59	16.8	1.35	165	5.94	17	17.1	3.09	38.4	86.5	9.27	39	9.09	0.55	8.58	1.55	9.73	1.88	5.48	0.82	5.28	0.78
20	Biezhentao range	DBT-20	Granite porphyry	76.32	0.08	12.43	0.31	0.46	n.a.	0.01	0.04	0.27	1.57	6.98	0.01	1.1	99.89	22.2	1.16	4.44	0.68	4.37	27.6	357	1.97	16	268	62.8	27.3	2.24	130	4.82	13.1	22.3	2.57	30.2	72.9	8.26	36	9.91	0.31	8.88	1.57	9.93	1.97	5.9	0.88	5.49	0.83
21	Hanjiga range	KKS-21	Granodiorite	66.24	0.62	15.92	2.24	n.a.	4.3	0.02	2.14	2.94	3.98	2.51	0.19	1.24	100.1	10	64.14	40.01	9.82	26.73	13.68	51.34	482.6	4.29	350.9	10.05	7.43	0.47	148.9	3.24	7.12	9.29	1.88	18.14	32.97	3.55	14.98	2.9	0.81	1.64	0.31	1.95	0.35	0.83	0.12	0.77	0.11
22	Hanjiga range	KKS-23	Granodiorite	66.84	0.62	15.63	2.33	n.a.	4.17	0.03	2.13	3.27	4.45	1.45	0.19	1.22	100	11.07	67.97	41.05	7.81	26.04	17.55	43.99	591	3.2	243.2	11.01	6.84	0.47	137.9	3.33	2.75	5.83	1.49	16.94	35.33	4.29	17.46	3.41	1.12	2.57	0.39	2.02	0.37	1.01	0.13	0.93	0.13
23	Hanjiga range	KKS-24	Granodiorite	66.06	0.62	15.89	2.18	n.a.	3.99	0.02	2.11	3.79	4.32	2.07	0.19	0.98	100.04	11.26	68.24	41.04	9.22	24.52	18.03	55.97	597.9	3.39	297.8	12.01	7.12	0.51	143.6	3.45	2.36	6.13	1.65	21.4	42.52	5.06	19.46	3.85	1.07	2.77	0.41	2.28	0.41	1.07	0.15	0.95	0.14
24	Hanjiga range	KKS-25	Granodiorite	65.54	0.63	16.01	1.76	n.a.	3.58	0.03	1.82	2.8	3.93	3.39	0.19	2.08	100	11.63	70.21	37.71	11.58	28.04	18.02	91.79	560.1	4.9	672.6	11.72	7.28	0.54	152.7	3.82	5.32	6.87	1.98	18.23	36.77	4.49	17.38	3.39	1.19	2.71	0.4	2.18	0.42	1.1	0.16	1.03	0.15
25	Boluokenu range	NLKD14-1	Biotite granite	61.97	0.96	16.32	0.871906	4.9408	6.46	0.1	1.41	3.86	4.56	3.11	0.3	0.7	99.05	13	76	n.a.	10.4	<20	23.3	114.1	265.5	9.8	447	45.5	16.5	1.4	456.5	10.9	7.1	4.5	1.8	30.3	73.1	8.82	38	8.52	2.01	8.83	1.45	8.41	1.79	4.63	0.68	4.54	0.7
26	Boluokenu range	NLKD14-2	Biotite granite	72.58	0.29	14.25	0.259142	1.46847	1.92	0.02	0.35	1.57	3.66	4.65	0.03	0.5	99.32	5	14	n.a.	2	<20	17.9	113	116.9	6.1	520	30.9	9.5	0.8	234	7	6	17.2	1.9	45.3	93.1	10.34	39.2	7.76	1.31	6.96	1.1	5.99	1.09	3.31	0.47	2.9	0.47
27	Boluokenu range	NLKD14-3	Biotite granite	67.97	0.55	15.18	0.534481	3.02873	3.96	0.05	0.68	2.07	4.23	3.74	0.17	1.2	98.6	6	30	n.a.	5.3	<20	20.5	103.5	169.6	5.8	453	19.7	12.5	0.9	332.6	8.5	10.3	8.1	1.8	31.1	57.3	6.1	22.5	4.05	1.52	3.98	0.55	3.37	0.69	2.03	0.31	2.04	0.34
28	Boluokenu range	NLKD14-4	Biotite granite	64.22	0.78	15.94	0.735587	4.16832	5.45	0.09	1.08	3.02	4.33	4.03	0.23	0.6	99.17	11	54	n.a.	7.6	<20	21.2	118.5	206.5	8.7	668	44.2	14.7	1	400.1	9.8	6.4	10.8	2	42.2	87.8	10.26	40.8	8.65	1.94	8.55	1.35	7.98	1.66	4.6	0.64	4.3	0.64
29	Boluokenu range	NLKD14-5	Biotite granite	63.93	0.77	16.28	0.751783	4.2601	5.57	0.09	1.09	3.31	4.59	3.39	0.23	0.5	99.25	11	51	n.a.	8	<20	23	113.6	229	8.2	567	39.8	14.7	1.1	400.7	10	5.2	8.9	2	35.5	77	8.76	37.1	7.63	1.95	7.95	1.27	7.2	1.44	4.39	0.63	4.05	0.59
30	Boluokenu range	NLKD14-6	Biotite granite	62.22	0.94	16.45	0.851661	4.82608	6.31	0.1	1.39	3.66	4.28	3.6	0.29	0.5	99.24	13	67	n.a.	9.8	<20	22.3	111.2	264.3	6.8	571	43.1	15.9	1.1	423.3	10.6	5.7	6.9	1.7	31.8	73.4	8.79	36.8	8.25	2.06	8.48	1.36	7.91	1.62	4.76	0.67	4.19	0.64
31	Boluokenu range	NLKD14-7	Biotite granite	64.24	0.89	14.76	0.931293	5.27733	6.9	0.12	1.35	3.37	3.97	3.32	0.26	0.6	99.18	15	61	n.a.	9.2	<20	22.1	114.1	187.3	7.2	460	56.1	16.5	1	394.3	10.3	6	7.1	1.7	34.1	84.4	10.56	46.1	10.35	1.77	10.52	1.75	10.31	2.08	5.89	0.86	5.61	0.83
32	Boluokenu range	NLKD14-8	Biotite granite	64.42	0.77	16	0.730188	4.13773	5.41	0.08	1.07	3.17	4.4	3.67	0.23	0.5	99.22	11	53	n.a.	7.5	<20	22.7	119.3	233.9	7.5	613	47.4	15.1	1	432.7	10.6	5.3	7	1.7	28	72.8	8.78	35.9	8.8	1.93	8.64	1.43	8.14	1.66	4.78	0.71	4.19	0.65
33	Boluokenu range	NLKD14-9	Biotite granite	65.35	0.8	15.14	0.799022	4.52779	5.92	0.1	1.19	3.14	4.05	3.54	0.24	0.3	99.47	13	60	n.a.	8.1	<20	23.3	132.7	192	9.5	500	51.6	15.4	1.3	369.7	9.7	7.1	11.4	1.8	38.6	86.1	10.56	42.7	9.43	1.73	9.87	1.59	9.15	1.8	5.19	0.8	5	0.79
34	Boluokenu range	NLKD14-10	Biotite granite	64.23	0.79	16.19	0.736936	4.17597	5.46	0.09	1.07	3.28	4.57	3.43	0.24	0.4	99.35	11	53	n.a.	7.8	<20	22.2	115.3	232.5	7.2	564	44.3	16	1.3	450.9	11.3	5.5	10.1	1.9	33	77.1	9.11	37.8	8.72	1.99	8.99	1.43	8.18	1.71	4.97	0.68	4.38	0.69
35	Boluokenu range	JHB14-01	Monzogranite	71.67	0.44	13.83	0.40356	2.28684	2.99	0.06	0.73	2.02	3.39	3.97	0.09	0.6	99.19	8	39	n.a.	4.9	<20	15.7	162.5	134.8	11.8	560	31.6	9	1.1	211.3	6.2	8.5	14.5	2.8	28.3	59.7	6.72	26.7	5.61	1.11	5.76	0.96	5.63	1.2	3.53	0.53	3.59	0.54
36	Boluokenu range	JHB14-12	Monzogranite	71.2	0.43	13.69	0.40356	2.28684	2.99	0.07	0.74	2.3	3.4	3.82	0.1	1.1	98.74	9	41	n.a.	4.9	<20	16	153.8	144.4	11.7	512	33.9	9.1	0.9	218.5	6.5	8.8	12.1	1.6	26.7	56.3	6.45	25.6	5.47	1.14	5.87	1	6.51	1.23	3.52	0.54	3.4	0.52
37	Boluokenu range	JHB14-03	Monzogranite	69.84	0.53	14.36	0.44945	2.54688	3.33	0.07	1.28	2.86	3.45	3.41	0.12	0.6	99.25	8	52	n.a.	7.5	<20	16.7	154.2	163.5	13.3	337	30.7	10.1	1.5	213.7	6.2	4.6	16.5	2.4	23	47.7	5.55	23.2	5.12	1.06	5.21	0.93	5.13	1.18	3.21	0.53	3.56	0.53
38	Boluokenu range	JHB14-04	Monzogranite	71.59	0.43	13.62	0.391413	2.21801	2.9	0.06	0.71	1.95	3.34	4.02	0.09	1.1	98.71	8	38	n.a.	5.1	<20	16.1	160.2	145	11.2	588	32.9	9.5	0.9	228.9	6.7	8.9	13	2.1	28.5	61.4	6.62	25.8	5.7	1.2	5.84	1.04	6.22	1.2	3.54	0.51	3.61	0.53
39	Boluokenu range	JHB14-05	Monzogranite	70.05	0.51	13.78	0.471045	2.66926	3.49	0.08	0.9	2.36	3.45	3.89	0.1	1.2	98.61	10	45	n.a.	6.2	<20	16.2	159.7	141.6	12.4	470	33.6	10	0.9	246.2	6.9	9.2	13.4	2.1	30	62.6	6.97	28.1	6.12	1.09	5.91	1.07	6.12	1.29	3.74	0.55	3.34	0.53
40	Boluokenu range	JHB14-06	Monzogranite	70.38	0.5	13.92	0.454849	2.57748	3.37	0.07	0.86	2.4	3.5	3.76	0.11	0.9	98.87	10	47	n.a.	5.7	<20	15.4	155.5	134.8	12.8	461	37.1	10.1	1.1	240.4	6.5	8.6	14	1.8	30.7	62.1	7	28.1	6.7	1.01	6.23	1.07	6.02	1.35	3.75	0.59	3.92	0.58
41	Boluokenu range	JHB14-07	Monzogranite	70.42	0.48	14.2	0.4508	2.55453	3.34	0.07	0.82	2.29	3.61	3.61	0.11	0.9	98.95	10	46	n.a.	5	<20	16.3	150.5	143.3	11.9	452	34.4	9.7	1	221.6	6.1	8.6	12.9	2	25.6	53.6	6.18	24.9	5.89	1.1	5.8	1.02	6.08	1.2	3.56	0.53	3.62	0.55
42	Boluokenu range	JHB14-08	Monzogranite	72.34	0.4	13.38	0.356321	2.01915	2.64	0.05	0.66	1.8	3.37	4.03	0.08	1.1	98.75	7	35	n.a.	4.3	<20	15.4	147.3	134.9	8.1	440	30.2	7.9	1	186.3	5.4	11.4	13.8	3.4	27.7	56.1	6.23	23.4	5.38	0.97	5.08	0.94	5.54	1.1	3.35	0.5	3.37	0.49
43	Boluokenu range	JHB14-09	Monzogranite	71.88	0.45	13.48	0.419757	2.37862	3.11	0.06	0.78	2	3.31	3.82	0.1	0.8	98.99	9	41	n.a.	4.4	<20	16.2	160.4	126.8	10.8	475	33.6	10.1	0.9	217.9	6.2	7.8	14.2	2.9	29	58.2	6.87	26.8	5.75	0.94	5.71	1.05	6.28	1.25	3.67	0.56	3.77	0.54
44	Boluokenu range	JHB14-10	Monzogranite	71.64	0.44	13.42	0.411658	2.33273	3.05	0.06	0.76	2.16	3.25	4.12	0.1	0.8	99	8	39	n.a.	4.6	<20	14.7	156.2	132	12.1	584	28.2	8.2	1.1	207	5.7	10.9	11.2	1.9	25.3	51.7	5.9	23.1	4.92	1.02	5.16	0.87	5.2	1.03	3.09	0.45	2.91	0.44
45	Boluokenu range	JHB14-11	Monzogranite	71.8	0.45	13.52	0.411658	2.33273	3.05	0.07	0.75	2.09	3.25	4	0.1	0.7	99.08	8	43	n.a.	4.8	<20	15.2	156	129.9	10.9	480	29.1	9.2	0.8	206.5	5.5	10	11.4	1.7	28.5	57.2	6.37	23.5	5.31	1.05	5.42	0.93	5.68	1.06	3.01	0.48	3.33	0.46
46	Boluokenu range	14Kd-56	Monzogranite	73.94	0.04	13.16	n.a.	n.a.	1.76	0.03	0.34	1.52	3.52	4.88	0.01	0.32	99.52	7.82	2411	5.07	261.4	18.77	17.92	187.05	132.78	8.61	445.4	26.7	8.01	1.21	159.17	5.96	n.a.	15.56	3.94	23.93	55.25	6.05	23.96	5	0.85	5.23	0.79	4.94	0.98	3.03	0.44	3.08	0.45
47	Boluokenu range	14Kd-57	Monzogranite	73.06	0.26	13.83	n.a.	n.a.	2.03	0.04	0.35	1.54	3.1	5.02	0.06	0.65	99.94	11.82	12.38	2.47	282.6	17.49	17.72	176.45	96.12	18.64	618.1	43.33	11.35	1.3	193.17	10.09	n.a.	15.33	2.28	35.46	80.49	9.13	38.06	8.37	1.38	8.88	1.35	8.63	1.67	4.95	0.7	4.7	0.69
48	Boluokenu range	14Kd-58	Monzogranite	72.35	0.36	13.74	n.a.	n.a.	2.68	0.05	0.47	1.16	3.46	5.44	0.09	0.52	100.32	8.97	32.65	7.05	265.9	21.09	18.57	141.75	139.28	9.17	420.7	31.26	8.5	1.2	151.95	5.79	n.a.	12.23	3.61	28.16	63.92	7.08	29.12	6.11	1.19	6.47	0.99	6.32	1.21	3.59	0.51	3.37	0.48
49	Boluokenu range	14Kd-59	Monzogranite	73.36	0.31	13.26	n.a.	n.a.	2.4	0.06	0.44	1.31	3.49	5.17	0.07	0.59	100.46	5.45	39.28	6.14	220.1	16.93	17.83	168.85	97.71	3.76	574.4	34.95	8.19	1.26	165.55	6.48	n.a.	16.65	3.39	26.06	59.87	6.58	26.93	6.02	1.1	6.56	1.04	6.75	1.35	4.05	0.6	4.01	0.58
50	Yilianhabierga range	XJ695	K-feldspar granite	71.35	0.22	13.78	n.a.	n.a.	2.54	0.06	0.09	0.8	3.78	5.65	0.05	0.33	98.64	n.a.	14.89	7.22	3.26	3.479	18.56	120.2	251.8	n.a.	1152	43.3	11.58	1.206	533.8	10.56	n.a.	11.54	2.674	54.77	106.2	12.11	43.49	6.315	0.471	4.104	0.572	3.171	0.591	1.729	0.263	1.878	0.321
51	Yilianhabierga range	XJ694	Biotite granite	71.4	0.23	14.01	n.a.	n.a.	2.66	0.05	0.1	0.88	3.9	5.75	0.04	0.29	99.3	n.a.	18.02	10.65	2.815	4.38	17.68	162	231.6	n.a.	330.3	18.06	8.131	1.447	110.7	3.21	n.a.	12.19	2.516	52.07	103.6	11.69	42.58	6.416	0.468	4.373	0.65	3.588	0.676	1.992	0.307	2.218	0.376
52	Yilianhabierga range	XJ701	Biotite granite	72.79	0.24	14.06	n.a.	n.a.	1.77	0.05	0.51	2.09	3.72	3.3	0.08	0.78	99.37	n.a.	1.611	5.857	0.734	—	18.04	73	40.44	n.a.	134.3	18.13	8.563	0.854	410.7	9.486	n.a.	7.68	1.965	18.35	37.36	4.222	15.48	3.36	0.637	3.05	0.498	2.914	0.574	1.666	0.26	1.838	0.283
53	Yilianhabierga range	XJ702	Biotite granite	69.39	0.47	13.93	n.a.	n.a.	3.9	0.08	0.49	2.03	4.02	3.72	0.12	0.66	98.82	n.a.	1.903	9.21	0.796	3.726	18.41	67.33	19.81	n.a.	124.6	15.93	8.768	0.608	414.5	9.55	n.a.	7.499	1.295	33	71.59	8、925	35.96	8.295	2.323	7.651	1.238	7.538	1.48	4.222	0.623	4.159	0.641
54	Yilianhabierga range	DK11	Biotite diorite	49.74	3.09	14.8	n.a.	n.a.	13.23	0.16	5.24	8.82	2.83	0.79	0.33	0.55	99.58	30.7	n.a.	n.a.	n.a.	n.a.	n.a.	24	429	2.62	240	20.7	6.51	0.49	201	4.45	4.73	2.55	0.82	11.1	26.4	3.57	16.1	4.11	1.71	4	0.68	4.07	0.83	2.26	0.34	2.17	0.33
55	Yilianhabierga range	DK13	Biotite diorite	69.46	0.54	14.44	n.a.	n.a.	3.55	0.05	0.86	2.22	3.67	4.1	0.14	0.6	99.63	7.29	n.a.	n.a.	n.a.	n.a.	n.a.	178	121	14.5	396	47.8	14.1	1.69	310	8.71	23.6	34.6	7.63	47	85.1	11.6	44.5	8.86	1.2	8.15	1.4	8.59	1.79	5.03	0.77	5.17	0.8
56	Yilianhabierga range	DK14	Biotite diorite	69.7	0.79	12.92	n.a.	n.a.	5.15	0.07	2.67	2.65	2.38	2.32	0.11	0.95	99.71	13.2	n.a.	n.a.	n.a.	n.a.	n.a.	72.5	164	5.77	590	23.1	13.4	0.68	259	7.31	13.7	15.4	2.22	35.4	71.3	8.57	33.8	6.36	1.53	5.68	0.84	4.6	0.89	2.43	0.37	2.4	0.38
57	Alatao range	Al1101-1	Granite	76.0724	0.200855	12.6975	n.a.	n.a.	1.52417	0.0297563	0.279497	1.04997	3.60104	4.41138	0.0244427	0.360544	100.252	3.079	11.39	5.538	1.774	2.542	19.23	205.9	68.52	13.61	226.5	56.81	10.69	1.858	177.3	6.291	18.62	17.76	3.444	31.31	72.52	9.052	35.29	8.261	0.495	8.489	1.593	9.998	2.091	6.323	1.004	6.318	0.98
58	Alatao range	Al1101-2	Granite	73.708	0.207659	13.9446	n.a.	n.a.	1.64458	0.0314634	0.303098	0.934464	3.60521	5.5061	0.0272683	0.342677	100.255	2.352	11.08	3.178	1.832	1.961	20.06	229.4	71.2	14.14	309.8	46.78	9.472	1.211	176.5	6.374	20.62	21.41	3.371	36.61	80.33	10.01	37.78	8.066	0.527	7.735	1.346	8.488	1.76	5.3	0.822	5.375	0.821
59	Alatao range	Al1105-1	Granite	73.5421	0.196491	14.1419	n.a.	n.a.	1.59982	0.0271396	0.265968	1.03456	4.04232	5.12939	0.0249685	0.266302	100.271	2.747	11.58	3.897	1.75	1.938	21.34	219.1	75.93	13.76	254.3	46.04	9.284	1.252	191.3	6.8	20.54	21.65	2.011	37.27	78.35	9.612	35.61	7.785	0.577	7.741	1.37	8.495	1.815	5.355	0.838	5.384	0.846
60	Alatao range	Al1105-2	Granite	75.3782	0.224771	12.8512	n.a.	n.a.	1.8668	0.0296867	0.337156	0.954216	3.54943	4.66612	0.0328675	0.347929	100.238	3.086	12.91	6.149	2.083	2.518	20.24	224.3	61.89	11.92	223	53.49	11.58	1.445	167.7	6.254	20.81	23.79	2.916	35.12	79	9.644	36.27	8.261	0.459	8.178	1.496	9.372	1.992	5.901	0.927	5.924	0.91
61	Alatao range	KWSY1*	Granite	76.48	0.16	12.94	n.a.	n.a.	1.51	0.03	0.19	0.88	3.73	4.73	0.03	0.7	101.36	3.57	n.a.	n.a.	2.4	n.a.	17.51	243.8	61.51	14.31	251.6	52.19	14.58	2.11	138.79	5.76	21.1	19.57	1.04	28.66	67.61	8.52	30.73	7.31	0.48	7.4	1.33	8.46	1.81	5.63	0.92	6.29	0.94
62	Alatao range	KWSY5*	Granite	73.77	0.18	13.54	n.a.	n.a.	1.63	0.03	0.21	0.99	4	5.14	0.04	0.78	100.29	5.18	n.a.	n.a.	2.49	n.a.	19.75	228.52	74.54	8.02	310.81	46.38	12.73	1.56	164.86	6.06	20.1	21.59	1.44	32.47	70.9	8.99	32.74	7.33	0.63	7	1.24	8.13	1.78	5.04	0.77	5.07	0.76
63	Alatao range	KWSY8*	Granite	74.15	0.34	13.13	n.a.	n.a.	2.56	0.04	0.6	1.44	3.29	4.47	0.08	1.12	101.2	4.7	n.a.	n.a.	5.43	n.a.	22.74	184.2	154.18	8.96	443.51	45.31	12.91	1.67	191.93	6.57	17.83	17.31	2.76	34.08	75.47	9.7	34.02	8.21	0.83	8.04	1.37	8.71	1.62	4.83	0.71	4.65	0.72
64	Alatao range	KWSY12*	Granite	73.05	0.29	13.39	n.a.	n.a.	2.43	0.05	0.52	1.65	3.7	4.37	0.07	0.68	100.21	6.42	n.a.	n.a.	4.46	n.a.	21.38	187.58	133.18	8.06	407.87	45.88	17.01	3.93	194.92	7.02	19.58	19.82	2.94	31.88	68.45	8.63	31.94	7.7	0.82	7.7	1.36	7.89	1.67	5.01	0.79	5.25	0.8
65	Alatao range	Al1102-1	Granite dyke	76.387	0.0705565	12.8382	n.a.	n.a.	0.922457	0.0145263	0.118286	0.725279	3.13463	4.93895	0.00415038	1.08082	100.235	1.329	2.513	1.373	0.292	0.754	23.85	369.1	27.41	8.058	31.82	94.53	13.39	2.234	109.2	5.555	18.66	45.47	6.95	16.99	45.54	6.247	25.16	8.653	0.074	11	2.288	15.31	3.367	10.1	1.587	10.19	1.478
66	Alatao range	Al1102-2	Granite dyke	76.1641	0.0717398	12.2164	n.a.	n.a.	0.936548	0.0176893	0.0717398	0.889377	3.45432	4.45278	0.00294821	1.19297	99.4706	1.337	2.602	1.125	0.218	0.47	22.36	333.5	24.44	6.498	17.14	90.68	11.83	2.125	114.8	5.541	26.76	47.77	6.711	21.23	51.86	7.472	29.68	9.652	0.071	12.13	2.397	15.14	3.273	9.726	1.477	9.665	1.38
67	Alatao range	Al1106-1	Granite dyke	76.7705	0.178291	12.432	n.a.	n.a.	1.59005	0.0225549	0.211586	0.483319	3.73324	4.34235	0.0161106	0.462803	100.243	2.07	7.139	3.523	1.523	1.785	22.19	298.4	21.53	6.594	35.45	74.52	21.83	3.093	165.1	7.808	20.13	40.83	13.27	30.11	73.18	9.252	34.41	8.369	0.14	9.022	1.714	11.27	2.589	8.442	1.412	9.708	1.466
68	Alatao range	Al1106-2	Granite dyke	76.8239	0.149439	12.6217	n.a.	n.a.	1.36691	0.0204269	0.196743	0.488095	3.68277	4.5853	0.0118261	0.312686	100.26	1.812	6.875	3.929	1.331	2.138	21.28	294.4	22.37	7.353	36.32	70.57	18.19	3.059	140.7	7.095	22.95	39.51	12.33	25.35	62.2	7.946	30.63	7.848	0.15	8.641	1.757	11.52	2.596	8.492	1.428	9.953	1.541
69	Alatao range	KWSY1	Granite	76.48	0.16	12.94	n.a.	n.a.	1.51	0.03	0.19	0.88	3.73	4.73	0.03	0.7	101.36	3.57	n.a.	n.a.	2.4	n.a.	17.51	243.8	61.51	14.31	251.6	52.19	14.58	2.11	138.79	5.76	21.1	19.57	1.04	28.66	67.61	8.52	30.73	7.31	0.48	7.4	1.33	8.46	1.81	5.63	0.92	6.29	0.94
70	Alatao range	KWSY5	Granite	73.77	0.18	13.54	n.a.	n.a.	1.63	0.03	0.21	0.99	4	5.14	0.04	0.78	100.29	5.18	n.a.	n.a.	2.49	n.a.	19.75	228.52	74.54	8.02	310.81	46.38	12.73	1.56	164.86	6.06	20.1	21.59	1.44	32.47	70.9	8.99	32.74	7.33	0.63	7	1.24	8.13	1.78	5.04	0.77	5.07	0.76
71	Alatao range	KWSY8	Granite	74.15	0.34	13.13	n.a.	n.a.	2.56	0.04	0.6	1.44	3.29	4.47	0.08	1.12	101.2	4.7	n.a.	n.a.	5.43	n.a.	22.74	184.2	154.18	8.96	443.51	45.31	12.91	1.67	191.93	6.57	17.83	17.31	2.76	34.08	75.47	9.7	34.02	8.21	0.83	8.04	1.37	8.71	1.62	4.83	0.71	4.65	0.72
72	Alatao range	KWSY12	Granite	73.05	0.29	13.39	n.a.	n.a.	2.43	0.05	0.52	1.65	3.7	4.37	0.07	0.68	100.21	6.42	n.a.	n.a.	4.46	n.a.	21.38	187.58	133.18	8.06	407.87	45.88	17.01	3.93	194.92	7.02	19.58	19.82	2.94	31.88	68.45	8.63	31.94	7.7	0.82	7.7	1.36	7.89	1.67	5.01	0.79	5.25	0.8
73	Alatao range	KWSY3	Granite dyke	76.97	0.08	12.43	n.a.	n.a.	0.93	0.01	0.04	0.44	3.91	4.57	0.01	1.09	100.47	0.36	n.a.	n.a.	1.01	n.a.	12.94	225.01	14.81	5.08	47.96	83.23	13.35	2.02	143.23	7.64	18.07	42.71	7.81	18.16	49.72	7.28	27.56	7.82	0.1	8.25	1.76	11.84	2.76	9.01	1.51	10.18	1.62
74	Alatao range	KWSY4	Granite dyke	75.41	0.18	12.2	n.a.	n.a.	1.77	0.03	0.19	0.69	3.3	5.14	0.03	1.12	100.05	1.9	n.a.	n.a.	2.49	n.a.	13.68	280.23	27.73	7.59	72.82	51.49	13.01	1.9	179.21	7.32	24.6	51.93	5.45	24.92	59.37	7.57	27.73	6.84	0.17	6.86	1.32	8.36	1.78	5.61	0.85	5.9	0.95
75	Alatao range	KWSY10	Granite dyke	77.32	0.04	12.64	n.a.	n.a.	0.75	0.01	<0.01	0.5	4.1	4.48	0	0.61	100.44	1.6	n.a.	n.a.	0.53	n.a.	14.55	213.02	19.51	13.1	54.64	72.33	20.88	5.34	170.92	10.88	25.68	47.86	10.98	7.19	22.04	3.35	14.56	4.71	0.12	5.54	1.4	10.14	2.53	8.85	1.63	12.05	1.9
76	Alatao range	KWSY30	Granite dyke	77.23	0.04	12.16	n.a.	n.a.	0.94	0.01	0.01	0.37	3.95	4.85	0.01	0.87	100.43	0.41	n.a.	n.a.	0.17	n.a.	14.75	205.36	7.89	5.9	36.9	95.34	12.62	0.93	100.56	6.43	23.66	38.34	3.44	14.41	46.87	7.68	34.28	9.54	0.07	11.31	2.51	17.29	3.69	10.6	1.62	10.24	1.56
77	Alatao range	KWSY24	Granite	76.39	0.07	12.24	n.a.	n.a.	1.06	0.02	0.02	0.44	3.82	4.77	0.01	0.82	99.67	1.7	n.a.	n.a.	0.36	n.a.	13.37	198	12.42	6.81	64.91	80.33	14.17	1.02	182.7	8.31	21.64	21.18	4.99	34.08	84.67	11.24	41.73	11.25	0.18	11.78	2.26	12.24	2.91	8.8	1.36	8.59	1.31
78	Alatao range	KWSY25	Granite	76.19	0.08	12.83	n.a.	n.a.	1.18	0.02	0.02	0.36	4.08	5.17	0.01	0.53	100.47	1.82	n.a.	n.a.	0.32	n.a.	13.63	207.96	10.03	12.74	64.46	63.37	13.58	1.16	164.44	7.48	22.84	18.07	4.08	29.15	70.36	9.35	32.98	9.66	0.18	9.89	1.83	10.56	2.39	6.98	1.03	6.59	0.99
79	Alatao range	KWSY27	Granite	77.16	0.1	12.36	n.a.	n.a.	1.38	0.02	0.03	0.44	3.85	4.8	0.01	0.6	100.75	1.36	n.a.	n.a.	0.45	n.a.	13.46	203.52	15.81	8.49	60.26	76.59	15.27	1.44	215.37	9.22	22.18	21.92	5.21	40.31	92.39	12.13	44.23	11.96	0.18	12.21	2.26	12.59	2.76	8.45	1.24	8.07	1.13
80	Awulale range	YXQ-1	Quartz syenite porphyry	59.7	1.2	17.1	n.a.	n.a.	8.15	0.1	0.22	1.1	4.79	6.34	0.6	0.39	99.69	18.5	106	2.57	22.4	2.83	18.9	212	104	n.a.	722	31.9	12.4	0.82	291	7.65	9.81	23.8	4.44	34.4	84.1	10.2	41.6	8.56	1.68	7.68	1.1	6.22	1.27	3.5	0.5	3.51	0.54
81	Awulale range	YXQ-2	Quartz syenite porphyry	62.1	1.02	15.5	n.a.	n.a.	6.26	0.14	1.3	1.73	3.98	6.54	0.34	0.75	99.66	14.1	61.2	0.16	25.6	1.43	19	267	227	n.a.	589	34.9	14.8	1	256	6.88	19.2	22.4	4.89	35.1	79.4	11	44.2	8.9	1.55	7.91	1.22	6.81	1.4	4.08	0.62	3.96	0.65
82	Awulale range	YXQ-3	Quartz syenite porphyry	58.8	1.16	16.7	n.a.	n.a.	8.35	0.07	0.18	1.2	4.4	7.88	0.61	0.33	99.67	19.8	112	4.75	20.1	3.68	17.4	260	91.9	n.a.	954	33.8	13.6	0.98	271	7.22	9.68	25.7	5.18	50.7	111	13.9	54.8	10.4	1.82	8.96	1.28	6.78	1.33	3.74	0.53	3.43	0.53
83	Awulale range	YXQ-4	Quartz syenite porphyry	59.3	1.16	16.7	n.a.	n.a.	8.1	0.08	0.16	1.16	5.03	6.99	0.6	0.32	99.67	20.3	92.5	3.04	19.8	2.53	16.4	220	101	n.a.	808	33.3	13.1	0.94	313	8.05	11.4	23.8	4.59	35.7	82.2	10.6	42.8	8.6	1.59	8.03	1.17	6.47	1.33	3.71	0.53	3.69	0.59
84	Awulale range	YXQ-6	Quartz syenite porphyry	59	1.16	16.6	n.a.	n.a.	8.17	0.07	0.18	1.21	4.55	7.69	0.62	0.34	99.66	19	87	1.54	37.5	2.6	16.2	243	93	n.a.	922	32.5	12.6	0.87	254	6.9	7.96	24.6	4.95	39.6	86.7	11.4	46.5	9.64	1.73	8.4	1.16	6.64	1.31	3.7	0.54	3.42	0.53
85	Awulale range	YXQ-7	Quartz syenite porphyry	61.9	1.02	15.6	n.a.	n.a.	6.59	0.14	1.25	1.9	4.71	5.41	0.36	0.84	99.67	16.2	77.1	1.69	36.9	4.21	19.7	235	212	n.a.	503	36.3	14.9	1.07	262	7.27	14.1	20.8	4.48	36.3	80.1	11.4	46.5	9.45	1.67	8.03	1.25	7.35	1.52	4.38	0.64	4.02	0.68
86	Awulale range	0943-3	Granite	70.73	0.48	13.44	n.a.	n.a.	1.92223	0.05	1.02	1.76	2.69	5.39	0.09	1.31868	100.169	n.a.	43.892	13.699	2.37	17.537	12.822	134.06	58.203	0.638	253.665	18.193	7.048	0.675	179.038	5.123	2.288	15.386	4.404	15.298	32.513	4.091	15.508	3.207	0.573	3.07	0.518	3.089	0.631	1.842	0.302	2.096	0.322
87	Awulale range	0943-5	Granite	71.91	0.51	13.19	n.a.	n.a.	1.23208	0.04	0.9	1	2.75	5.53	0.11	0.979217	99.6792	n.a.	30.923	10.163	4.942	1.884	12.753	108.575	105.003	0.603	179.383	16.932	6.819	0.674	162.565	4.763	2.283	15.564	4.753	20.08	41.521	5.009	18.572	3.656	0.677	3.384	0.551	3.018	0.585	1.68	0.281	1.992	0.309
88	Awulale range	0943-9	Granite	70.94	0.47	13.43	n.a.	n.a.	0.932071	0.05	1.05	1.84	2.5	5.47	0.09	1.17835	100.178	n.a.	10.352	14.859	2.582	26.277	9.665	59.932	74.689	0.402	182.893	14.076	6.626	0.81	163.838	5.204	1.881	13.662	5.888	12.785	21.056	2.188	8.212	1.874	0.367	2.052	0.365	2.263	0.483	1.515	0.265	2.103	0.354
89	Awulale range	0943-10	Granite	71.15	0.47	13.48	n.a.	n.a.	0.522025	0.05	1.05	1.93	2.56	5.16	0.09	0.858969	100.109	n.a.	8.612	5.604	1.604	0.903	9.929	62.871	71.169	0.378	144.918	11.908	6.779	0.81	164.452	5.251	1.71	13.153	5.51	5.259	10.744	1.37	5.682	1.49	0.307	1.636	0.303	1.918	0.419	1.313	0.237	1.835	0.323
90	Awulale range	0943-11	Granite	71.42	0.46	13.32	n.a.	n.a.	0.551951	0.05	0.99	1.84	2.69	5.16	0.09	1.11955	100.32	n.a.	8.472	12.036	1.824	0.197	8.71	92.33	59.754	0.483	212.209	11.684	6.911	0.863	170.823	5.524	1.69	15.012	5.666	8.132	15.324	1.679	6.493	1.537	0.3074	1.624	0.3	1.89	0.408	1.258	0.24	1.92	0.327
91	Awulale range	DD-117	K-Feldspar granite	74.77	0.27	12.94	n.a.	n.a.	1.79901	0.04	0.27	1.06	3.28	5.41	0.05	0.6	101.03	n.a.	n.a.	n.a.	n.a.	2.02	14.7	213	96.5	2.42	360	60.2	9.99	0.96	263	6.76	2.93	22.4	4.97	36	78.8	10.3	39	8.56	0.9	9	1.59	10.1	2.18	6.91	0.97	6.33	0.92
92	Awulale range	DD-118	K-Feldspar granite	75.05	0.28	12.44	n.a.	n.a.	1.89793	0.04	0.29	1.08	3.29	5.01	0.05	0.67	100.81	n.a.	n.a.	n.a.	n.a.	2.85	14.1	185	89.8	n.a.	342	55.6	9.92	0.91	n.a.	7.64	2.55	22.5	4.86	39.5	88.1	11	40.8	8.55	0.81	8.7	1.46	9.35	1.96	6.34	0.9	6.14	0.87
93	Awulale range	DD-119	K-Feldspar granite	76.76	0.14	11.94	n.a.	n.a.	0.914503	0.03	0.17	1.13	2.67	4.87	0.01	1.41	101.36	n.a.	n.a.	n.a.	n.a.	1.79	15.5	244	24.1	n.a.	140	44.2	15.7	1.39	n.a.	9.43	4.5	67.6	15.1	16.6	31.2	4.38	15.9	3.79	0.12	4.64	0.96	7.05	1.59	5.35	0.81	5.73	0.91
94	Awulale range	ZK001-4	Granodorite	71.47	0.32	13.86	n.a.	n.a.	2.93	0.05	0.54	1.91	4.23	3.54	0.1	0.24	99.19	5.12	15.2	295	5.61	7.39	15.5	85.6	205	1.74	729	31.5	12.4	0.698	88.8	2.29	10.4	9.88	2.21	32.4	67.4	7.52	30.2	5.33	1.15	4.78	0.928	5.09	1.08	3.05	0.592	3.82	0.49
95	Awulale range	ZK001-5	Granodorite	68.89	0.47	14.67	n.a.	n.a.	4.01	0.1	0.82	2.76	4.55	2.68	0.17	0.38	99.5	7.66	23.8	251	6.78	7.04	18	60.7	289	2.08	667	39.5	12.5	0.641	73.9	2.19	10.7	6.47	1.81	37.5	74.9	9.27	35.6	7.2	1.67	6.63	1.2	6.65	1.33	3.73	0.71	4.58	0.534
96	Awulale range	ZK001-6	Granodorite	68.28	0.51	14.8	n.a.	n.a.	4.3	0.1	0.93	2.91	4.46	2.69	0.19	0.44	99.61	8.38	32.8	211	6.85	6.14	17.5	61.3	311	2.12	733	40.7	12.8	0.633	99.2	2.48	8.74	6.72	1.59	39.3	81.6	10	38.6	7.52	1.81	6.94	1.33	7.15	1.42	3.87	0.723	4.48	0.558
97	Awulale range	ZK001-7	Granodorite	70.38	0.41	14.17	n.a.	n.a.	3.52	0.09	0.69	2.26	4.43	3.14	0.14	0.38	99.61	6.29	25.2	292	6.47	7.1	17.5	80.9	240	2.6	739	34.6	12.2	0.628	92.6	2.53	9.17	7.6	1.99	39.3	78.9	9.01	34	6.06	1.49	5.54	1.08	5.8	1.23	3.26	0.601	4.01	0.513
98	Awulale range	ZK001-8	Granodorite	70.47	0.4	14.14	n.a.	n.a.	3.41	0.08	0.68	2.24	4.44	3.11	0.14	0.52	99.63	5.92	24.3	288	5.78	7.31	17.4	78.4	240	2.6	688	34.5	11.8	0.656	107	2.75	9.6	8.1	2.37	34.4	72.2	8.49	31.6	5.91	1.41	5.8	1.1	5.78	1.18	3.25	0.642	4.12	0.49
99	Awulale range	ZK001-9	Granodorite	69.65	0.46	14.47	n.a.	n.a.	3.96	0.1	0.8	2.61	4.45	2.88	0.17	0.36	99.91	7.54	26.2	203	6.15	5.9	17.1	87.4	257	1.61	655	46.6	14.3	0.865	82.9	2.63	10.2	8.66	2.87	32.5	71.9	8.88	35.3	6.9	1.7	6.94	1.3	7.24	1.58	4.3	0.872	5.65	0.683
100	Awulale range	NS-1	Quartz monzonite porphyry	69.29	0.25	15.48	1.26	2.06024	n.a.	0.02	0.79	1.43	5.8	2.55	0.09	1.66	99.4202	2.65	31	9.58	2.96	5.32	16.8	39.2	221	5.3	762	3.78	8.9	21.66	90.8	2.71	6.32	2.09	1.05	11	21.1	2.66	9.67	1.75	0.61	1.54	0.15	0.75	0.13	0.41	0.05	0.39	0.06
101	Awulale range	NS-2	Quartz monzonite porphyry	71	0.25	14.67	1.11	1.99354	n.a.	0.03	0.79	1.01	5.83	2.65	0.09	1.12	99.4335	3.21	29.7	8.12	3.02	7.53	15.8	40.8	192	3.83	769	4.16	5.95	8.66	90.1	2.69	7.28	2.16	1.07	11.6	21.8	2.59	9.8	1.91	0.64	1.71	0.17	0.82	0.15	0.44	0.06	0.42	0.07
102	Awulale range	NS-3	Quartz monzonite porphyry	68.09	0.25	14.79	1.08	2.0702	n.a.	0.03	0.85	2.33	6.3	2.44	0.09	2.27	99.5102	3.45	32.6	5.53	3.01	4.37	16.1	38.9	237	4.83	765	3.01	6.64	11.3	87.8	2.64	5.22	2.12	0.86	12.8	23.1	2.86	10.15	1.77	0.59	1.49	0.13	0.65	0.11	0.34	0.05	0.33	0.06
103	Awulale range	NS-4	Quartz monzonite porphyry	67.96	0.25	14.4	1.26	2.06024	n.a.	0.03	0.83	2.61	5.54	3.37	0.09	2.42	99.5602	3.36	31.2	7.23	2.93	4.83	14.4	53.8	298	4.12	1045	3.05	7.17	14.6	86.2	2.59	5.16	2.01	0.87	12.8	20.4	2.34	8.13	1.55	0.64	1.35	0.12	0.54	0.11	0.35	0.05	0.34	0.06
104	Awulale range	NS-5	Quartz monzonite porphyry	66.29	0.27	14.32	1.34	1.77914	n.a.	0.05	0.87	3.94	4.78	4.1	0.1	3.72	100.219	3.49	30.6	12.3	3.1	8.06	14.5	73.8	263	3.3	3801	4.2	4.44	2.93	102	2.87	10.79	2.15	1.04	16.8	36	4.09	14.3	3.3	1.36	2.24	0.19	0.84	0.15	0.45	0.05	0.39	0.06
105	Awulale range	NS-6	Quartz monzonite porphyry	68.28	0.24	14.54	1.04	1.87575	n.a.	0.03	0.83	2.39	5.35	3.54	0.09	2.31	99.4758	3.46	28.4	10.2	2.83	7.12	15.1	56.2	262	4.11	1024	3.11	5.52	4.71	87	2.68	5.68	2.07	0.78	20.1	37.3	3.52	11.7	1.77	0.68	1.69	0.14	0.58	0.11	0.36	0.05	0.36	0.06
106	Awulale range	QJ1-2	Albite porphyry	72.11	0.52	13.8	n.a.	n.a.	2.27	0.03	0.17	0.52	4.96	4.37	0.06	0.83	99.64	6.72	24.3	0.17	25.9	0.43	17.3	85.8	76.8	n.a.	612	34.4	20	1.26	582	13.4	9.24	15.8	5.3	51	105	13.6	49.1	8.54	1.55	6.57	1.13	6.77	1.42	4.31	0.64	4.35	0.71
107	Awulale range	QJ1-3	Albite porphyry	71.71	0.53	14.13	n.a.	n.a.	2.27	0.04	0.33	0.56	4.94	4.67	0.06	0.41	99.65	6.6	20.5	0.57	22.4	0.83	17.7	90	47.7	n.a.	506	34.4	20.1	1.27	552	13.4	3.15	15.3	3.71	40.4	85.9	11.4	42.1	7.81	1.43	6.12	1.04	6.67	1.4	4.09	0.68	4.34	0.67
108	Awulale range	QJ1-4	Albite porphyry	71.6	0.52	14.32	n.a.	n.a.	2.26	0.04	0.26	0.55	5.17	4.48	0.05	0.4	99.65	7.38	27.1	1.29	24.5	0.12	17.9	89.6	62.1	n.a.	553	35	21	1.41	559	13.6	3.14	16.4	4.22	45.2	96.6	12.5	46.6	8.46	1.63	6.76	1.19	7.1	1.52	4.33	0.68	4.73	0.73
109	Awulale range	QJ1-5	Albite porphyry	70.9	0.52	14.21	n.a.	n.a.	2.27	0.04	0.26	1.26	5.61	3.67	0.05	0.85	99.64	6.73	19.8	0.76	14.7	0.86	17.6	66.1	51.6	n.a.	370	34.2	19.3	1.23	573	13.8	2.52	16.1	3.79	42.9	89.9	11.9	43.9	8.11	1.59	6.39	1.09	6.91	1.46	4.11	0.66	4.38	0.7
110	Awulale range	QJ1-6	Albite porphyry	70.62	0.55	15.1	n.a.	n.a.	2.19	0.02	0.06	0.63	6.89	2.71	0.06	0.84	99.67	7.09	41	1.76	28.3	0.49	20.3	48.3	47.5	n.a.	228	37	21.8	1.37	634	14.8	3.29	17	6.16	51.1	103	12.9	47.9	8.43	1.67	6.66	1.14	7.09	1.5	4.53	0.72	4.54	0.77
111	Awulale range	QJ1-7	Albite porphyry	69.9	0.57	15.34	n.a.	n.a.	2.42	0.01	0.03	0.65	7.25	2.53	0.06	0.88	99.64	7.44	44.8	0.98	13.5	0.28	21.7	44.3	48.6	n.a.	201	38.8	21.6	1.28	620	14	5.76	16	5.5	56	106	13.6	50.3	8.67	1.74	6.94	1.18	7.36	1.58	4.47	0.71	4.8	0.76
112	Awulale range	QJ2-4	Albite porphyry	71.37	0.54	14.14	n.a.	n.a.	3.16	0.02	0.15	0.59	6.1	2.85	0.05	0.68	99.65	5.5	19.8	0.08	26.8	0.61	16.8	52.6	40.9	n.a.	338	28	19.7	1.2	588	13.1	9.1	15.1	3.51	25.9	67.3	8.57	32.4	6.11	0.97	4.55	0.71	4.58	1.02	3.27	0.52	3.77	0.63
113	Awulale range	11QJ5-1	Albite porphyry	71.51	0.4	13.32	n.a.	n.a.	3.2	0.03	0.26	1.12	4.69	4.03	0.05	0.89	99.49	5.46	20.1	13.8	2.23	1.24	15.5	89.4	57.6	n.a.	397	43	19.7	1.44	421	9.5	6.45	18.2	5.59	28.2	70.2	9.7	37.6	7.57	0.9	6.95	1.24	7.72	1.72	5.04	0.82	5.67	0.91
114	Awulale range	11QJ5-2	Albite porphyry	70.17	0.44	14.23	n.a.	n.a.	3.56	0.03	0.29	1.01	5.48	3.65	0.06	0.74	99.66	5.67	24	51.6	3.24	2.78	16.6	76.9	70.4	n.a.	375	44.1	18.8	1.38	559	11.8	10.8	17.1	6.07	46.3	105	13.5	49.1	8.96	1.17	7.91	1.39	8.32	1.86	5.16	0.86	5.62	0.9
115	Awulale range	10QJ-3D	Albite porphyry	70.06	0.49	14.33	n.a.	n.a.	2.53	0.06	0.2	1.42	5.15	4.32	0.06	1.04	99.6	6.96	15.4	34.9	1.33	1.01	16.2	86.2	53.3	n.a.	445	35.1	19.8	1.25	522	10.3	7.63	14.1	3.43	23.1	59.7	8.44	34.2	7.12	1.34	6.26	1.09	6.45	1.41	3.98	0.63	4.36	0.68
116	Awulale range	QJ100	Albite porphyry	71.51	0.49	14.47	0.68	1.52568	n.a.	0.03	0.26	0.58	5.69	3.72	0.06	0.9	99.79	6.7	34.5	1.47	1.86	0.74	16.2	69.9	49.7	0.51	331	36.22	24	1.64	604	16.3	1.94	7.78	1.51	31.89	72.21	9.44	36.68	7.05	1.39	6.19	1.02	6.27	1.26	3.97	0.76	5.02	0.88
117	Awulale range	QJ02	Albite porphyry	76.93	0.42	9.82	1.04	2.24575	n.a.	0.11	0.13	0.72	3.23	2.79	0.06	0.95	98.19	5.9	24.6	27.25	2.77	2.93	11.2	72.9	44.2	0.83	337	91.39	57.73	4.36	468	13.7	4.49	14.41	4.23	33.62	68.39	11.3	50.47	12.49	2.21	11.1	2.17	14.47	3.17	10.44	1.97	13.51	2.32
118	Awulale range	QJ09	Albite porphyry	70.99	0.51	14.74	0.9	2.37017	n.a.	0.11	0.21	0.55	6.66	2.66	0.08	0.26	100.02	6.8	36.3	16.6	3.12	2.65	17.8	52.9	71	0.61	261	40.77	21.33	1.57	559	15	2.96	12.33	2.63	22.99	53.16	7.01	27.87	5.61	0.86	5.28	1.01	6.72	1.41	4.42	0.84	5.47	0.96
119	Awulale range	QJ10	Albite porphyry	68.95	0.53	14.54	1.74	2.30366	n.a.	0.1	0.45	0.67	7.16	0.94	0.07	1.4	97.85	6.8	40.1	9.68	2.34	2	19.7	26.9	89.1	0.3	158	41.56	22.26	1.62	621	17.6	7.57	8.3	1.88	63.57	98.2	11.66	40.85	6.49	1.17	6.19	1.03	6.55	1.36	4.37	0.8	5.34	0.94
120	Awulale range	QJ11	Albite porphyry	71.34	0.53	13.45	1.94	2.47592	n.a.	0.1	0.21	0.57	5.27	3.02	0.06	0.25	98.03	7.4	34.6	7.73	1.78	2.01	15.8	66.1	60	0.43	355	21.24	23.28	1.53	609	16.9	1.24	6.7	1.35	20.91	42.96	5.3	19.38	4.13	0.8	3.4	0.64	4.04	0.81	2.61	0.5	3.27	0.58
121	Awulale range	QJ14	Albite porphyry	66.44	0.61	15.64	1.98	2.88037	n.a.	0.08	0.16	0.63	6.96	2.7	0.07	0.26	97.36	6.3	45.5	6.36	1.15	1.91	17.7	57.3	41.9	0.28	241	32.83	26.85	1.82	707	18.9	3.31	9.67	1.92	27.7	49	6.43	24.07	5.4	1.13	4.91	0.88	5.7	1.16	3.68	0.73	4.93	0.9
122	Awulale range	QJ15	Albite porphyry	65.3	0.54	14.12	1.53	3.01029	n.a.	0.09	0.19	1.84	5.49	2.99	0.06	0.77	95.43	7	25.3	11	1.87	1.33	14.2	56.9	40.4	0.43	232	40.02	25.02	1.66	653	18.1	4.77	8.25	1.47	16.41	40.83	5.5	22.37	4.82	0.93	4.61	0.88	5.9	1.26	3.97	0.74	4.95	0.87
123	Awulale range	QJ22	Albite porphyry	70.6	0.49	14.23	1.53	3.01029	n.a.	0.13	0.22	1.21	5.33	4.27	0.06	0.52	100.02	6.3	34.1	11.5	2.19	2.17	17.2	87.2	34	0.56	345	38.33	25.37	1.64	601	16.4	4.11	10.6	1.57	43.32	79.9	10.17	39.36	7.27	1.44	6.4	1.05	6.57	1.29	4.02	0.73	4.83	0.85
124	Awulale range	QJ26	Albite porphyry	71.54	0.51	13.39	1.14	2.94688	n.a.	0.11	0.24	0.47	4.92	3.38	0.06	0.71	99.66	7.4	35.6	5.37	1.68	1.99	16.6	71.7	35.6	0.48	316	20.69	24.4	1.63	591	16.1	1.54	6.46	1.54	33.61	67.43	7.88	26.81	4.85	0.92	4.11	0.63	3.84	0.76	2.53	0.51	3.53	0.66
125	Awulale range	QJ32	Albite porphyry	72.33	0.42	13.21	0.86	2.34572	n.a.	0.1	0.23	0.75	3.98	5.27	0.06	0.31	99.88	5.4	29.1	21.2	3.04	2.48	13.9	114	49.7	1.1	523	41.81	23.61	1.69	495	13.4	5.83	20.3	5.39	18.62	36.7	5.26	21.77	5.08	0.65	4.91	1	6.85	1.46	4.54	0.87	5.69	1.03
126	Awulale range	06XJ93	Granite porphyry	67.73	0.33	15.28	n.a.	n.a.	2.15	0.02	0.75	2.99	4.73	2.55	0.09	3.36	99.97	3.19	35.3	12	4.09	6.28	14.8	49.6	862	8.04	534	3.52	1.86	0.127	90.3	2.35	5.98	2.02	0.559	11.1	23	2.85	10.7	1.7	0.509	1.11	0.133	0.658	0.119	0.301	0.04	0.288	0.044
127	Awulale range	06XJ94	Granite porphyry	68.9	0.32	16.07	n.a.	n.a.	2.15	0.05	0.86	0.64	5.98	3.39	0.03	1.31	99.69	5.86	36.3	12	4.69	4.96	16.3	72.6	433	6.03	845	2.37	3.61	0.237	120	3.13	6.05	2.07	0.749	12.2	22.1	2.66	9.03	1.27	0.44	0.842	0.092	0.459	0.087	0.224	0.035	0.244	0.037
128	Awulale range	06XJ95	Granite porphyry	68.29	0.34	16.56	n.a.	n.a.	1.98	0.05	0.87	0.64	6.21	3.63	0.04	1.1	99.71	4.02	38.5	15.4	4.99	7.99	17.8	83.7	497	10.7	968	2.77	3.8	0.243	135	3.38	7.74	2.1	0.885	16.9	34	3.68	12.6	1.75	0.458	1.01	0.108	0.534	0.093	0.275	0.041	0.264	0.041
129	Awulale range	06XJ96-1	Granite porphyry	70.11	0.25	15.8	n.a.	n.a.	1.86	0.02	0.76	0.84	4.85	4.29	0.04	0.89	99.7	4.01	28.4	18.3	3.5	5.88	17.1	108	559	13.2	1630	2.96	4.31	0.315	115	3.22	12.5	2.2	1.03	11.4	21.2	2.16	7.29	1.05	0.406	0.687	0.095	0.482	0.097	0.308	0.045	0.357	0.055
130	Awulale range	06XJ96-	Granite porphyry	69.05	0.28	15.8	n.a.	n.a.	2.48	0.02	0.61	0.76	5.34	4.69	0.03	0.95	100	3.98	28.7	11.5	3.35	5.58	16.9	96.7	586	19.7	1431	3.24	4.29	0.303	108	2.99	4.92	2.07	0.884	8.04	14.1	1.42	4.98	0.903	0.375	0.704	0.098	0.578	0.115	0.322	0.051	0.373	0.062
131	Awulale range	06XJ-98	Granite porphyry	69.01	0.29	15.72	n.a.	n.a.	2.25	0.03	0.68	1.28	5.06	3.82	0.04	1.23	99.4	4.02	30.9	17.3	4.52	7.61	16	64.6	696	2.8	880	2.96	3.82	0.265	124	3.21	9.61	2.22	0.79	17.2	32.7	3.5	11.4	1.5	0.407	0.896	0.109	0.561	0.108	0.282	0.045	0.303	0.054
132	Awulale range	06XJ-99	Granite porphyry	67.25	0.33	16.21	n.a.	n.a.	2.45	0.04	1.02	1.69	5.1	3.48	0.04	1.9	99.52	3.67	36.9	13.2	5.03	5.04	18.3	55.9	617	2.12	1099	2.87	3.66	0.232	93.1	2.47	9.35	2.16	0.678	19.3	37.7	4.12	13.5	1.93	0.468	1.11	0.116	0.602	0.104	0.277	0.037	0.261	0.038
133	Awulale range	06XJ-10	Granite porphyry	68.32	0.33	15.86	n.a.	n.a.	2.08	0.03	0.41	2.03	4.85	3.79	0.05	2.01	99.75	3.79	36.9	21	4.04	9.91	14.5	56.1	530	3.75	992	3.35	3.6	0.215	138	3.35	18.7	2.08	0.682	17.6	34.6	3.75	13	1.96	0.556	1.14	0.127	0.624	0.108	0.298	0.043	0.272	0.043
134	Awulale range	06XJ-11	Granite porphyry	60.37	0.58	17.37	n.a.	n.a.	4.32	0.08	2.65	3.32	6.05	2.71	0.09	2.08	99.61	9.31	78.9	34.2	13.2	25.3	19	50	813	2.61	1135	5.64	3.56	0.196	111	2.95	7.46	1.15	0.373	13	27.2	3.41	13	2.22	0.788	1.59	0.214	1.13	0.222	0.604	0.084	0.599	0.095
135	Awulale range	NLKB14-1	Monzonite porphyry	69.8	0.25	15.43	1.36905	0.241596	1.79	0.02	0.5	0.67	4.88	4.48	0.1	1.8	97.92	4	38	n.a.	6.1	<20	16.3	87.3	371.6	22.4	977	5.1	3.8	0.3	94.1	2.5	4.2	2.1	0.5	18.8	33.9	3.54	12.2	1.84	0.55	1.47	0.18	0.93	0.19	0.52	0.07	0.46	0.07
136	Awulale range	NLKB14-2	Monzonite porphyry	64.28	0.53	15.3	2.09563	0.369818	2.74	0.1	0.38	4.2	5.32	3.77	0.09	2.9	96.71	12	78	n.a.	6.8	<20	13.9	78.7	309.8	1.5	1171	17.9	5.9	0.5	160.7	4.2	60.1	8	2	23.3	43.9	5.11	19.7	3.62	1.08	3.33	0.55	3.18	0.67	1.94	0.29	1.82	0.31
137	Awulale range	NLKB14-3	Monzonite porphyry	65.83	0.58	15.49	2.35568	0.415708	3.08	0.08	0.42	3.12	4.41	3.58	0.09	3.1	96.68	11	92	n.a.	7.7	<20	14.5	75	197.4	8.8	827	18.8	6.9	0.5	179	4.8	350.2	8.5	1.6	25.8	46.7	5.61	21.9	4.22	1.17	3.75	0.58	3.44	0.69	1.95	0.33	2.03	0.32
138	Awulale range	NLKB14-4	Monzonite porphyry	69.27	0.26	14.77	1.54496	0.272639	2.02	0.04	0.9	1.59	5.16	3.41	0.1	2.2	97.52	4	37	n.a.	4	<20	16.1	57.7	417.6	4.5	1277	3.3	3.3	0.3	100.3	2.8	5.9	1.8	0.7	16.9	31.2	3.16	11	1.47	0.46	1.13	0.11	0.61	0.14	0.32	0.06	0.34	0.04
139	Awulale range	NLKB14-5	Monzonite porphyry	68.77	0.27	15.21	1.62144	0.286136	2.12	0.04	0.83	1.79	4.96	3.33	0.1	2.4	97.42	4	33	n.a.	3.8	<20	16.9	55.9	260.5	6.3	897	3.4	3.6	0.2	101.9	2.6	4.2	1.9	0.4	19.8	36.8	3.68	12.5	1.87	0.51	1.19	0.15	0.62	0.12	0.33	0.05	0.32	0.05
140	Awulale range	NLKB14-6	Monzonite porphyry	68.59	0.27	15.26	1.66733	0.294235	2.18	0.03	0.92	1.41	4.99	3.6	0.1	2.4	97.35	4	35	n.a.	4.3	<20	16.7	72.3	525.7	15.1	1197	3.9	3.9	0.2	102.7	2.8	4.8	1.7	0.4	19.4	37.1	3.73	13.3	1.83	0.61	1.26	0.13	0.63	0.12	0.41	0.06	0.3	0.06
141	Awulale range	NLKB14-7	Monzonite porphyry	67.71	0.26	15.11	1.81265	0.319879	2.37	0.04	0.97	1.28	4.99	4.68	0.1	2.1	97.51	4	34	n.a.	4.1	<20	16.6	104.1	242.7	4.7	2012	3.7	3.8	0.7	103.2	3	6	1.8	0.8	14.9	27.4	3.03	11.4	1.73	0.51	1.27	0.13	0.73	0.12	0.27	0.05	0.31	0.06
142	Awulale range	NLKB14-8	Monzonite porphyry	68.14	0.28	15.8	1.85854	0.327977	2.43	0.03	0.95	0.8	5.05	4.59	0.11	1.5	98.18	4	38	n.a.	4.1	<20	18.3	87.1	351.4	8.4	1997	4	3.5	0.3	111.6	3.2	4.3	1.9	0.6	19.2	39.1	3.51	11.4	1.71	0.49	1.27	0.15	0.69	0.12	0.37	0.05	0.34	0.05
143	Awulale range	NLKB14-9	Monzonite porphyry	67	0.23	14.93	1.93502	0.341474	2.53	0.04	0.77	2.08	5.28	4.02	0.09	2.7	96.97	4	31	n.a.	3.7	<20	16.3	73.2	353.7	5.3	1481	3.7	3.8	0.3	89.1	2.7	3.6	2.1	0.6	19.6	38.5	4.14	13.4	1.88	0.53	1.24	0.14	0.71	0.13	0.37	0.07	0.4	0.05
144	Awulale range	NLKB14-10	Monzonite porphyry	69.28	0.23	14.82	1.52966	0.26994	2	0.05	0.77	1.68	6.19	2.64	0.09	2.1	97.75	4	30	n.a.	3.6	<20	15.8	46.5	322.4	6.8	597	4.2	3.8	0.3	90.7	2.6	4.4	1.9	0.5	23.1	48.2	4.19	13.8	1.96	0.54	1.39	0.16	0.73	0.14	0.35	0.06	0.35	0.05
145	Awulale range	NLK14-1	Granite porphyry	73.5	0.16	13.75	1.03252	0.182209	1.35	0.02	0.37	0.29	4.58	4.86	0.05	0.9	98.93	3	<8	n.a.	1.3	<20	15.3	90.9	42.5	0.9	517	4	2.9	0.3	62.8	2.1	1.6	2.1	0.8	16.8	31.7	3.32	11.9	1.96	0.43	1.28	0.16	0.82	0.13	0.36	0.06	0.38	0.07
146	Awulale range	NLK14-2	Granite porphyry	75.12	0.15	13.52	0.481843	0.0850311	0.63	0.01	0.33	0.17	4.34	5.02	0.04	0.5	99.33	2	14	n.a.	0.9	<20	15.6	88.3	54.5	1.3	546	4.3	2.4	0.2	59.4	1.9	3.4	2.5	0.7	22.1	40.9	3.96	12.7	1.8	0.39	1.26	0.15	0.74	0.13	0.46	0.07	0.36	0.06
147	Awulale range	NLK14-3	Granite porphyry	74.84	0.15	13.38	0.818368	0.144418	1.07	0.02	0.38	0.15	4.26	4.95	0.04	0.6	99.24	2	8	n.a.	1.1	<20	14.7	87.7	38.5	1.1	484	3.3	2.3	0.5	57.1	1.8	4.9	2.2	0.6	12.1	24.2	2.43	7.7	1.18	0.22	0.73	0.12	0.62	0.13	0.36	0.05	0.39	0.06
148	Awulale range	NLK14-4	Granite porphyry	75.09	0.14	13.51	0.588919	0.103927	0.77	0.02	0.37	0.15	4.34	4.92	0.04	0.5	99.35	2	9	n.a.	0.8	<20	14.9	86.8	42.2	0.9	500	4.3	2.4	0.7	60.5	2.2	11.2	2.2	1	13.1	26.5	2.76	9.6	1.63	0.28	1.25	0.15	0.78	0.14	0.49	0.07	0.43	0.06
149	Awulale range	NLK14-5	Granite porphyry	74.86	0.15	13.51	0.481843	0.0850311	0.63	0.01	0.32	0.18	4.39	5.04	0.04	0.7	99.13	2	11	n.a.	0.9	<20	14.2	89.2	54.6	1.4	579	4.5	2.3	0.3	57.9	2.1	4.4	2.3	0.9	16.3	30.1	2.98	9.9	1.33	0.32	1.02	0.13	0.74	0.13	0.42	0.06	0.44	0.06
150	Awulale range	NLK14-6	Granite porphyry	74.38	0.15	13.21	1.03252	0.182209	1.35	0.03	0.62	0.19	4.33	4.56	0.05	1	98.87	2	14	n.a.	2	<20	18.7	81.8	45.5	1.3	525	4	2.2	0.2	58.2	2.1	8.1	2.3	0.5	12.2	24.2	2.48	8.3	1.22	0.29	0.95	0.13	0.68	0.12	0.38	0.06	0.43	0.06
151	Awulale range	NLK14-7	Granite porphyry	73.73	0.15	13.63	1.11665	0.197056	1.46	0.02	0.43	0.14	4.32	5.1	0.05	0.8	99.03	2	<8	n.a.	2.5	<20	15.8	93.3	53.2	1.1	561	4.8	2.5	0.2	59.9	2	6.9	2.2	0.6	12.5	24.9	2.55	9.2	1.44	0.31	1.06	0.13	0.73	0.13	0.43	0.06	0.42	0.06
152	Awulale range	NLK14-8	Granite porphyry	74.01	0.15	13.52	1.15489	0.203805	1.51	0.02	0.42	0.17	4.35	4.97	0.04	0.7	99.16	2	10	n.a.	1.7	<20	16.1	90	40.1	0.8	490	4.2	2.5	0.4	59.4	2.1	2.6	2.2	0.8	14.9	29.6	2.94	10.4	1.31	0.31	1.01	0.14	0.66	0.15	0.37	0.07	0.39	0.05
153	Awulale range	NLK14-9	Granite porphyry	73.52	0.15	13.84	1.02487	0.18086	1.34	0.02	0.41	0.32	4.54	5.01	0.04	0.6	99.19	2	15	n.a.	1.5	<20	15.9	89.2	43	1.1	497	4.1	2.4	0.1	59.1	2.1	5.2	2.1	0.8	16.8	32.9	3.3	11.7	1.65	0.39	1.35	0.15	0.83	0.14	0.38	0.06	0.42	0.05
154	Awulale range	NLK14-10	Granite porphyry	75.09	0.15	13.2	0.757182	0.13362	0.99	0.02	0.46	0.24	4.28	4.69	0.04	0.7	99.16	2	16	n.a.	1.4	<20	15.1	81.8	53.7	1.3	555	4.3	2.3	0.1	58.3	1.9	4.7	2.4	0.6	13.6	24.6	2.45	7.9	1.2	0.23	0.91	0.12	0.62	0.12	0.35	0.06	0.37	0.06
155	Awulale range	NLK14-11	Granite porphyry	75.19	0.15	13.17	0.67305	0.118774	0.88	0.02	0.42	0.22	4.31	4.76	0.05	0.6	99.17	2	13	n.a.	1.6	<20	14.1	82.8	57.8	1.4	597	3.9	2.5	0.2	57.8	1.9	9.1	2.3	1.1	18.8	32.7	3.28	11.2	1.37	0.27	1.03	0.13	0.67	0.11	0.35	0.07	0.4	0.06
156	Awulale range	NLK14-12	Granite porphyry	74.43	0.16	13.75	0.49714	0.0877305	0.65	0.01	0.35	0.18	4.56	4.97	0.05	0.7	99.11	2	19	n.a.	1.2	<20	15.4	90.4	41.8	1	525	5.5	2.2	0.2	59.6	2	7.5	1.8	0.8	14.4	28.9	3.14	10.8	1.76	0.38	1.5	0.19	0.89	0.19	0.41	0.07	0.44	0.07
157	Awulale range	109-02	Albite porphyry	72.1	0.5	12.13	2.21	n.a.	1.42	0.16	0.03	0.61	6.6	0.13	0.076	1.83	95.71	8.2	15.6	37.4	1.46	2.82	11.6	26.9	29	0.18	80	52.3	9.2	0.7	352	11.6	4.02	4.94	0.75	43.1	80.5	10.4	42.7	8.4	1.1	7.6	1.3	7.6	1.5	4.3	0.8	4.8	0.8
158	Awulale range	109-03	Albite porphyry	74.28	0.54	11.32	1.07	n.a.	0.58	0.03	0.16	0.83	6.04	0.37	0.076	1.76	96.16	11.4	14.5	1.8	0.8	0.2	11.6	26.9	48.5	1.07	70	43.6	10.5	0.9	360	11.4	2.31	7.19	1.34	28	57.8	7.2	30.4	6.6	0.9	5.9	1.1	6.9	1.4	4.3	0.8	5	0.9
159	Awulale range	109-04	Albite porphyry	60.14	0.54	11.32	4.29	n.a.	2.42	0.1	0.26	0.36	5.31	0.43	0.064	1.31	82.83	14	20.9	18.5	1.76	1.45	< 2.0	26.9	34.9	0.5	315	17.1	9.5	0.7	171	34	48	3.44	1.05	10.4	24.1	3.2	13.1	3.3	0.4	3.2	0.7	5	1.1	3.4	0.6	4	0.7
160	Awulale range	109-06	Albite porphyry	70.37	0.39	10.06	2.99	n.a.	1.92	0.19	0.08	0.23	5.1	0.06	0.039	2.42	91.03	10.3	17.5	43.9	1.52	2.66	< 2.0	26.9	29.9	0.12	169	28.3	6.8	0.5	206	23.4	24.75	3.43	0.97	5.7	12.9	1.7	8	2.2	0.3	2.3	0.5	3.9	1	3.1	0.6	3.7	0.7
161	Awulale range	109-07	Albite porphyry	76.22	0.41	11.31	1.65	n.a.	1.1	0.18	0.03	1.49	6.5	0.13	0.071	1.41	98.9	5.5	18.8	41.8	2.47	3.7	10.2	26.9	30.6	0.52	33	40.5	10.4	0.7	290	8.3	1.73	6.01	1.33	51.1	92.8	12	49.1	9.2	1.1	7.9	1.2	6.9	1.4	4.2	0.8	5	0.9
162	Awulale range	109-08	Albite porphyry	66.42	0.56	13.1	2.94	n.a.	1.64	0.16	0.19	0.6	6.3	0.28	0.084	1.19	90.94	14.6	24.9	15.6	1.44	1.54	< 2.0	26.9	50.3	0.25	185	37.4	9.7	0.8	266	24.5	26.3	5.67	2.27	13.6	28.2	4.2	18.4	4.7	0.6	4.6	1	7	1.5	4.8	0.9	5.7	1
163	Awulale range	109-09	Albite porphyry	61.39	0.52	11.44	5.54	n.a.	3.4	0.22	0.57	0.78	2.65	4.37	0.075	1.97	87.86	12.6	23.3	15	3.4	1.9	< 2.0	123	45.9	1.25	1017	26.5	9.9	0.7	253	27.9	33.5	11.8	4.29	9.1	22.5	3.4	15.7	4.1	0.4	3.9	0.8	5.1	1.1	3.4	0.6	3.9	0.7
164	Awulale range	109-10	Albite porphyry	70.88	0.45	10.59	2.42	n.a.	1.46	0.12	0.03	0.31	6.3	0.07	0.056	1.16	91.66	10.4	17.6	30.2	1.01	1.63	2.1	26.9	33	0.11	150	39.9	7.6	0.6	282	18.6	18.4	4.77	0.92	9.4	19.8	2.7	12	3.1	0.4	3.2	0.7	4.8	1.1	3.5	0.7	4.3	0.8
165	Awulale range	11KL01-1h	Albite porphyry	66.82	0.33	16.12	1.06	3.17798	n.a.	0.06	1.45	1.56	5.47	3.35	0.17	1.41	101.03	5.17	51.5	n.a.	6.77	8.37	17.9	63.9	660	n.a.	823	6.69	3.56	0.29	91	2.33	8.91	2.82	0.87	18.8	40.4	4.99	19.1	3.18	0.93	1.83	0.27	1.3	0.26	0.61	0.089	0.59	0.11
166	Awulale range	11KL01-2h	Albite porphyry	66.42	0.33	16.14	1.31	3.1658	n.a.	0.05	1.49	1.78	5.54	3.41	0.17	1.39	100.73	5.71	50.7	n.a.	7.23	7.17	18	63.8	651	n.a.	812	6.74	3.42	0.22	98.5	2.59	9.52	2.77	0.97	19.9	41.9	5.4	20	3.36	1.01	2.09	0.26	1.31	0.25	0.62	0.086	0.59	0.093
167	Awulale range	11KL01-3h	Albite porphyry	66.72	0.33	16.2	1.06	3.13798	n.a.	0.05	1.52	1.36	5.66	3.44	0.17	1.42	101.09	5.57	49.6	n.a.	7.32	7.06	18.2	68.2	514	n.a.	803	6.41	3.4	0.22	93.8	2.62	9.96	3.12	0.93	21.8	44.4	5.26	20	3.21	1	2.2	0.26	1.28	0.24	0.62	0.084	0.062	0.076
190	Awulale range	YTS7	Granite porphyry	74.16	0.14	13.7	n.a.	n.a.	0.88	0.02	0.46	0.16	4.16	5.48	0.04	0.47	99.66	1.34	10.7	11.3	30.8	6.77	18.5	108	52.4	n.a.	729	4.38	2.78	0.27	70.5	2.45	17.1	2.87	0.93	14.2	27.5	3.47	12.2	1.81	0.47	1.37	0.18	0.85	0.17	0.47	0.07	0.43	0.07
191	Awulale range	YTS9	Granite porphyry	73.99	0.14	13.11	n.a.	n.a.	0.34	0.01	0.44	1.15	3.99	5.07	0.04	1.38	99.65	0.84	10.5	0.85	17	0.26	16.7	93.5	56.9	n.a.	667	3.83	2.63	0.23	62	2.22	32.5	2.62	1.07	14	27.2	3.51	12.3	1.86	0.4	1.27	0.15	0.79	0.14	0.41	0.06	0.41	0.06
192	Awulale range	YTS11	Granite porphyry	74.03	0.13	13.29	n.a.	n.a.	0.48	0.02	0.53	0.85	4.01	5.11	0.04	1.16	99.65	1.38	9.2	44.6	15.3	27.95	20.3	103	41.6	n.a.	770	4.41	2.78	0.24	71.8	2.46	7.1	2.86	0.99	12.7	26	3.27	12.1	1.86	0.42	1.28	0.16	0.84	0.17	0.43	0.06	0.4	0.07
193	Awulale range	YTS12	Granite porphyry	74.86	0.13	14.09	n.a.	n.a.	0.73	0.01	0.51	0.16	3.78	4.73	0.03	0.7	99.73	1.37	9.08	0.8	16.3	0.39	18.5	101	41.2	n.a.	575	3.93	2.71	0.23	64.2	2.33	22.1	2.77	1.17	18	33.3	4.15	14.6	2.04	0.45	1.39	0.15	0.78	0.14	0.39	0.06	0.37	0.05
194	Awulale range	YTS13	Granite porphyry	73.47	0.12	13.54	n.a.	n.a.	0.57	0.02	0.46	0.8	3.77	5.62	0.04	1.3	99.69	1.03	7.57	0.5	9	0.26	17.7	113	43	n.a.	872	4.27	2.72	0.22	66.2	2.26	12.3	2.78	1.18	8.83	18.8	2.37	9.09	1.49	0.41	1.08	0.16	0.74	0.15	0.41	0.06	0.42	0.07
195	Awulale range	11YT2	Granite porphyry	73.72	0.15	13.37	n.a.	n.a.	0.98	0.01	0.43	1	4.46	4.44	0.04	1.12	99.72	3.21	12.8	25.6	1.71	8.17	15.1	85.8	38.5	1.17	636	4.87	2.44	0.21	60.3	2.15	5.05	2.64	1.07	10.2	22.4	2.87	10.9	1.89	0.38	1.44	0.18	0.88	0.17	0.46	0.07	0.5	0.08
196	Awulale range	11YT3	Granite porphyry	72.68	0.13	13.13	n.a.	n.a.	0.87	0.01	0.52	1.68	4.05	4.79	0.05	1.76	99.67	2.9	12.7	24.5	1.83	8.59	16.2	88.2	31.8	0.98	594	5.28	2.34	0.21	60.5	2.12	12.8	2.51	1.01	8.82	19	2.51	9.61	1.79	0.41	1.39	0.19	0.98	0.18	0.49	0.07	0.51	0.08
197	Awulale range	11YT4	Granite porphyry	72.69	0.13	12.78	n.a.	n.a.	0.9	0.01	0.43	1.64	3.99	4.73	0.05	1.74	99.09	3.15	12.9	23.3	2.19	11.06	15.7	89.2	92.9	1.15	3273	4.93	2.34	0.21	60.7	2.1	7.12	2.52	1.12	17.1	33.6	3.85	13.9	2.04	0.58	1.56	0.19	0.88	0.17	0.46	0.07	0.48	0.08
198	Awulale range	11YT5	Granite porphyry	74.36	0.15	13.53	n.a.	n.a.	0.96	0.01	0.47	0.38	4.47	4.59	0.05	0.61	99.58	2.75	12.3	25.1	1.46	8.8	15.8	88.4	33.1	1.59	585	3.85	2.45	0.22	61.7	2.2	16	2.55	0.93	11.8	24.4	2.8	10.5	1.65	0.38	1.24	0.16	0.79	0.14	0.37	0.06	0.39	0.06
199	Awulale range	11YT6	Granite porphyry	73.03	0.11	11.81	n.a.	n.a.	1.26	0.01	0.36	2.53	3.79	4.29	0.04	2.35	99.58	3.08	13.1	31.5	2.86	8.87	14.3	84.3	81.9	0.77	2905	5.07	2.02	0.19	52.5	1.87	11.9	2.3	0.97	17.9	35.3	4.11	14.6	2.13	0.65	1.67	0.19	0.86	0.16	0.42	0.07	0.43	0.07
200	Awulale range	11YT7	Granite porphyry	74.55	0.14	13.49	n.a.	n.a.	1.04	0.01	0.48	0.24	4.11	5.02	0.04	0.63	99.75	3.11	13.3	27	1.48	6.5	15.6	97.8	32.4	1.23	711	4.46	2.43	0.22	60.7	2.15	7.99	2.53	0.85	12.4	25.6	3.13	11.5	1.82	0.44	1.4	0.17	0.83	0.15	0.38	0.06	0.41	0.06
201	Alatao range	C14BL22	Ignimbrite	65.8	0.28	13.85	n.a.	n.a.	5.87	0.11	0.18	2.61	3.43	3.08	0.07	3.67	99	19.88	3.16	10.3	1.29	2.97	25.6	105	107	7.54	325	60.4	6.43	0.19	642	13.2	6.77	6.79	2.13	35.5	74.2	9.56	42.3	9.06	1.8	9.1	1.65	9.77	2.02	6.01	0.91	6.29	0.92
202	Alatao range	C14BL23	Ignimbrite	65.8	0.31	14.15	n.a.	n.a.	6.66	0.12	0.18	1.77	4.2	3.05	0.08	2.75	99.1	20.77	2.3	6.4	1.19	0.9	25.5	98.5	109	10.7	398	60.4	9	0.42	691	13.7	10.1	6.59	1.9	34.3	72.7	9.26	41.3	8.91	1.76	8.92	1.63	9.46	1.92	5.99	0.9	6.07	0.93
203	Alatao range	C14BL24	Ignimbrite	67	0.32	14	n.a.	n.a.	5.51	0.09	0.27	2.11	3.91	2.75	0.08	3.31	99.4	21.74	2.34	9.51	1.3	2.05	26.8	99.8	92.1	8.81	264	59.9	9.27	0.45	718	13.8	6.91	6.73	3.09	35.1	75.6	9.75	43	9.16	1.78	8.71	1.55	9.37	1.99	5.91	0.84	5.92	0.93
204	Alatao range	C14BL25	Ignimbrite	71.5	0.19	13.7	n.a.	n.a.	4.23	0.02	0.17	0.72	4.22	2.55	0.04	1.72	99.1	13.24	2.69	9.63	0.778	1.48	26.1	77.1	78	5.19	359	63.6	8.67	0.31	468	10.4	4.53	8.44	2.41	50	104	13	55.5	10.8	1.64	10.67	1.82	10.4	2.13	6.48	0.96	6.31	0.92
205	Alatao range	C14BL26	Ignimbrite	67.5	0.35	14.85	n.a.	n.a.	6.16	0.04	0.38	1	3.02	3.35	0.08	2.69	99.4	21.66	1.84	7.63	1.37	1.55	28.3	115	60.7	6.67	331	61.1	9.72	0.47	745	14.6	7.61	6.84	3.09	35.4	75.6	9.74	44.1	9.57	1.83	9.45	1.67	9.84	2.12	6.21	0.93	6.33	1.01
206	Alatao range	C14BL17	Rhyolite	74	0.27	12.85	n.a.	n.a.	1.63	0.03	0.2	1.4	3.13	4.36	0.04	1.82	99.7	9.16	14.3	13.5	1.89	3.04	18.4	134	65.7	5.41	568	40.9	7.16	0.45	242	6.26	18.1	11.9	2.56	27.6	57.1	7.14	28.3	6.03	0.59	5.91	1.1	6.45	1.37	4.11	0.61	3.79	0.6
207	Alatao range	C14BL18	Rhyolite	72.7	0.25	12.65	n.a.	n.a.	1.92	0.03	0.25	1.63	3.17	4.23	0.03	2.13	99	9.29	13.8	14.2	2.28	4.17	17.8	132	66.9	4.68	563	40.6	7.02	0.48	237	5.91	18.7	11.4	3.03	26.9	54.3	6.89	28	6.16	0.56	5.9	1.1	6.35	1.34	3.77	0.57	3.69	0.54
208	Alatao range	C14BL19	Rhyolite	73	0.26	12.75	n.a.	n.a.	2.07	0.03	0.25	1.16	3.51	4.21	0.03	1.68	99	9.71	13.6	13.7	2.34	2.96	18.9	131	60.2	3.91	515	42	7.6	0.52	242	6.2	18.6	11.7	2.47	28.5	58.7	7.33	29.5	6.4	0.62	6.25	1.12	6.73	1.33	3.93	0.6	3.8	0.58
209	Alatao range	C14BL20	Rhyolite	72.9	0.26	12.75	n.a.	n.a.	2.07	0.03	0.25	1.4	3.33	4.14	0.03	1.78	98.9	9.7	14.3	11.9	2.47	3.47	19	140	46.7	4.64	497	45.4	7.45	0.52	243	5.99	18.5	12.2	2.21	29.3	63	7.61	30.9	6.51	0.67	6.33	1.19	6.95	1.43	4.11	0.63	4.05	0.58
210	Alatao range	C14TL56	Biotite granite	75.5	0.13	13.4	n.a.	n.a.	1.25	0.04	0.34	1.54	3.66	3.27	0.04	0.46	99.6	7.3	24.8	7.12	1.93	2.82	15.8	94.2	203	8.33	709	13.4	8.43	0.64	74.8	2.01	14.4	8.47	0.964	17.9	32.6	3.42	12.5	2.42	0.46	2.2	0.351	1.85	0.362	1.14	0.16	1.08	0.17
211	Alatao range	C14TL57	Biotite granite	74.9	0.11	13.55	n.a.	n.a.	1.11	0.04	0.31	1.54	3.79	3.27	0.04	0.46	99.1	7.13	16.1	7.75	1.87	1.84	14.9	88.7	202	6.46	734	11.7	6.93	0.68	73.5	2.05	15.2	7.6	0.855	15.3	28.4	2.95	11.1	1.96	0.39	1.77	0.32	1.7	0.351	0.981	0.16	1.06	0.14
212	Alatao range	C14TL58	Biotite granite	75.1	0.13	13.65	n.a.	n.a.	1.28	0.05	0.35	1.63	3.85	3.09	0.04	0.42	99.6	6.84	17	7.1	1.87	1.76	15.7	88.1	208	7.51	725	12.1	7.59	0.6	78.2	2.21	15.1	8.55	0.957	18.8	34.2	3.75	13.1	2.39	0.42	1.97	0.338	1.88	0.335	1.12	0.16	0.99	0.16
213	Alatao range	C14TL59	Biotite granite	75.3	0.14	13.65	n.a.	n.a.	1.36	0.05	0.38	1.56	3.72	3.25	0.04	0.43	99.9	6.7	16.8	6.94	1.93	2.2	15.3	93.8	200	8.05	745	13.1	8.18	0.73	79.8	2.33	15.4	8.35	0.959	17.2	31.7	3.47	12.3	2.38	0.46	2.07	0.373	1.87	0.374	1.16	0.17	1.17	0.17
214	Alatao range	C14TL60	Biotite granite	74.7	0.13	13.55	n.a.	n.a.	1.31	0.05	0.35	1.63	3.79	3.04	0.05	0.42	99	6.96	18.4	13.1	1.99	5.65	15.5	90.9	208	9.13	731	13.5	8.01	0.64	86.8	2.37	14.9	9.1	1.08	19.4	35	3.85	13.9	2.28	0.46	2.29	0.369	1.94	0.398	1.11	0.17	1.13	0.18
215	Alatao range	C14TL61	Biotite granite	75.2	0.11	13.45	n.a.	n.a.	1.13	0.04	0.3	1.58	3.74	3.18	0.04	0.33	99.1	6.33	16.9	6.1	1.49	1.05	14.4	86.3	206	7.68	765	9.59	7.06	0.79	74.4	2.06	14.6	9.13	0.787	18.3	34.3	3.8	13.4	2.4	0.45	1.93	0.301	1.52	0.289	0.794	0.12	0.785	0.12
216	Alatao range	C14TL62	Biotite granite	75.5	0.13	13.35	n.a.	n.a.	1.28	0.05	0.34	1.58	3.76	3.12	0.03	0.38	99.5	6.55	16.7	5.43	1.73	1.18	14.8	104	192	19.4	695	13.5	7.94	0.76	84.1	2.46	15.1	7.97	1.01	16.6	30.5	3.25	11.8	2.14	0.43	2.11	0.369	1.99	0.398	1.21	0.17	1.12	0.17
217	Alatao range	KWSY17	Rhyolite	74.45	0.25	11.95	n.a.	n.a.	2.28	0.04	0.14	1.31	3.35	3.93	0.06	1.07	98.82	8.63	n.a.	n.a.	1.82	n.a.	33.26	103.55	126.2	5.14	881.47	52.03	13.63	0.87	265.18	8.59	18.7	12.22	3.94	38.73	83.2	10.49	39.79	10.2	1.53	9.76	1.66	10.02	1.92	6.04	0.87	5.72	0.87
218	Alatao range	KWSY18	Rhyolite	77.85	0.15	11.85	n.a.	n.a.	1.56	0.03	0.07	0.49	3.11	4.27	0.03	0.88	100.29	7.08	n.a.	n.a.	0.72	n.a.	40.65	118.7	66.78	4.97	1167.81	58.9	14.74	1.2	57.11	7.44	26.62	16.06	2.4	50.2	104.93	13.65	51.05	12.55	1.48	11.82	1.94	11.28	2.26	6.84	0.97	6.41	0.97
219	Alatao range	KWSY22	Rhyolite	75.92	0.2	11.64	n.a.	n.a.	2.06	0.04	0.11	0.84	3.28	4.35	0.04	1.2	99.68	7.21	n.a.	n.a.	1.23	n.a.	32.83	122.87	76.95	3.8	838.8	50.97	13.07	1.09	202.63	7.08	21.21	12.45	2.47	36.94	82.23	10.15	38.36	10.07	1.4	9.21	1.61	8.87	1.93	5.75	0.83	5.46	0.82
220	Alatao range	NS01	Rhyolite	77.02	0.12	11.98	n.a.	n.a.	1.15	0.03	0.09	1.1	4.43	2.67	0.03	1.85	100.47	8.62	n.a.	n.a.	0.29	n.a.	25.58	96.26	171.87	4.76	603.62	60.98	12.24	1.13	155.47	5.91	18.19	13.71	3.75	36.98	81.5	11.01	39.55	10.07	0.87	10.29	1.8	11.28	2.19	6.61	0.94	6.02	0.88
221	Alatao range	NS02	Rhyolite	77.48	0.12	11.98	n.a.	n.a.	1.2	0.02	0.11	0.76	4.27	2.97	0.02	1.65	100.58	6.91	n.a.	n.a.	0.29	n.a.	28.4	112.31	151.55	5.18	672.27	59.63	12.1	0.92	153.59	5.91	17.72	13.85	3.63	38.1	88.54	11.03	41.5	10.57	0.93	10.33	1.76	9.74	2.1	6.18	0.94	5.93	0.92
285	Awulale range	TRD01	Andesite	54.29	2.14	15.46	1.5	8.01	n.a.	0.16	1.04	4.9	5.48	3.39	1.04	2.38	99.8	29.4	n.a.	5.5	15.6	3.01	17.3	109	82	n.a.	555	50.1	9.91	0.69	261	5.72	13.9	6.29	2.23	23.9	57.2	8.36	38.1	9.07	3.29	9.89	1.67	10.3	2.1	5.71	0.88	5.87	0.88
286	Awulale range	TRD02	Andesite	61.44	1.83	13.51	1.25	6.83	n.a.	0.12	1.14	3.16	4.19	3.84	0.89	1.75	99.97	27.4	n.a.	6.6	25.9	2.98	17.4	114	63	n.a.	652	44	9.34	0.67	213	4.64	14.3	5.93	2.41	22.8	55.7	7.92	35.6	8.5	3.3	9.54	1.55	9.35	1.84	4.86	0.71	4.56	0.7
287	Awulale range	TRD03	Andesite	56.32	1.9	13.44	2.33	5.71	n.a.	0.24	2.1	5.59	4.6	2.23	0.92	4.38	99.76	26.1	n.a.	11.2	22.9	7.74	17.5	80.4	115	n.a.	548	57.9	8.13	0.59	202	4.17	6.77	6.64	1.94	26.7	62	8.92	40.7	10.98	3.51	11.79	1.95	11.5	2.15	5.5	0.8	5.07	0.76
288	Awulale range	TRD05	Andesite	62.76	1.22	15.16	2.27	3.74	n.a.	0.18	1.92	1.98	4.79	3.79	0.42	1.65	99.89	18.6	n.a.	0.7	15.7	1.54	18.9	140	203	n.a.	932	46.5	13.5	0.91	386	7.52	8.91	8.77	2.67	20.6	51.5	7.46	33.6	8.48	2.62	8.76	1.56	9.78	1.96	5.45	0.87	5.63	0.85
289	Awulale range	TRD07	Rhyolite	70.82	0.28	12.82	0.33	4.98	n.a.	0.07	0.05	0.31	2.78	6.74	0.06	0.5	99.75	11.4	n.a.	7	24	2.48	17.5	222	46.1	n.a.	357	56.8	13.5	1	414	8.19	4.89	15.03	4.34	34	67.7	9.02	38.2	8.61	0.56	9.39	1.65	10.5	2.19	6.39	1.04	7.12	1.12
290	Awulale range	TRD08	Rhyolite	74.27	0.13	12.04	0.16	2.35	n.a.	0.01	0.1	0.07	0.65	9.58	0.01	0.38	99.76	7.63	n.a.	1.5	24.9	1.72	13.9	387	64	n.a.	509	47.9	17.3	1.3	455	9.62	5.14	18.16	5.26	30.2	51.8	7.42	28.7	5.78	0.24	5.98	1.22	8.95	2.1	6.62	1.13	8.02	1.23
291	Awulale range	TRD09	Rhyolite	75.57	0.14	11.99	0.16	2.26	n.a.	0.01	0.03	0.34	3.07	5.63	0.01	0.47	99.7	7.21	n.a.	2	66.7	1.98	17.6	211	60.6	n.a.	215	34.5	16.6	1.35	481	10.4	4.73	17.07	4.01	33.1	72.3	7.48	28.2	5.43	0.27	4.97	0.87	5.63	1.25	4	0.7	4.99	0.81
292	Awulale range	TRD10	Rhyolite	74.74	0.15	12.33	0.48	2.13	n.a.	0.01	0.02	0.08	1.99	7.58	0.01	0.27	99.8	8.45	n.a.	1.5	42	1.8	17.7	292	49.4	n.a.	371	39.4	16.4	1.24	503	10.2	6.09	17.8	4.33	28.9	60.4	7.15	27.7	5.41	0.25	5.05	0.94	6.71	1.63	5.8	1.02	7.69	1.26
293	Awulale range	TRD11	Rhyolite	75.7	0.13	12.03	0.2	2.17	n.a.	0.02	0.02	0.4	2.59	6.16	0.01	0.44	99.85	6.44	n.a.	5	28.6	1.54	20.9	234	43.8	n.a.	302	54	16.6	1.21	453	9.87	3.85	18.44	4.66	49.3	99.9	11.6	45.4	9.17	0.3	8.42	1.53	10	2.13	6.5	1.05	7.5	1.13
294	Awulale range	TRD12	Rhyolite	75.99	0.13	12.07	0.16	2.25	n.a.	0.02	0.03	0.33	3.09	5.26	0.01	0.51	99.84	6.46	n.a.	3.3	36.6	1.56	20.1	194	41.8	n.a.	337	66	17.7	1.34	434	9.12	4.44	18.93	4.9	29.2	62.9	8.13	32.9	7.66	0.25	8.62	1.81	12.3	2.64	7.73	1.25	8.37	1.28
325	Awulale range	B016-2	Rhyolite	73.96	0.3	12.45	0.15	n.a.	1.97	0.06	0.36	0.35	2.75	6.87	0.03	0.81	99.91	7.87	12	4.28	0.71	1.21	17.8	197	41.1	1.62	468	55.8	20.3	1.26	489	12.7	7.16	15.8	4.13	48.4	97	11.6	45.6	9.37	1.67	8.92	1.66	10.3	2.06	6.42	1.04	6.99	1.18
[truncated: 107 more rows]
[truncated: 3 more columns]
